# Supplementary material for: Gram-scale enzymatic synthesis of 2′-deoxyribonucleoside analogues using nucleoside transglycosylase-2
Source: Royal Society of Chemistry journal article supplement (doi:10.1039/d4sc04938a), 2024-01-01
Supplement: d4sc04938a1.pdf [file d4sc04938a1.pdf]

## Supplementary Information

### Gram-scale enzymatic synthesis of 2'-deoxyribonucleoside analogues using nucleoside transglycosylase

Admir Salihovic,<sup>1</sup> Alex Ascham,<sup>2</sup> Andrea Taladriz-Sender,<sup>1</sup> Samantha Bryson,<sup>1</sup> Jamie M. Withers,<sup>1</sup> Iain J.W. McKean,<sup>1</sup> Paul A. Hoskisson,<sup>3</sup> Gideon Grogan,<sup>2\*</sup> Glenn A. Burley<sup>1\*</sup>

<sup>1</sup> Department of Pure and Applied Chemistry, University of Strathclyde. Thomas Graham Building, 295 Cathedral Street, Glasgow, G1 1XL, U.K. Email: [glenn.burley@strath.ac.uk](mailto:glenn.burley@strath.ac.uk)

<sup>2</sup> Department of Chemistry, University of York, Heslington, York, YO105DD, U.K. E-mail: [gideon.grogan@york.ac.uk](mailto:gideon.grogan@york.ac.uk)

<sup>3</sup> Strathclyde Institute of Pharmacy and Biomedical Sciences, University of Strathclyde, 161 Cathedral Street, Glasgow, G4 0RE, UK.

1. General Information – S2
  - 1.1 Reagents and solvents
  - 1.2 NMR spectroscopy
  - 1.3 LC-MS
  - 1.4 HPLC
2. General experimental techniques and procedures – S3-S6
  - 2.1 Preparation of stock solutions
  - 2.2 General procedures
  - 2.3 Analytical RP-HPLC method parameters
  - 2.4 RP-HPLC semi preparatory method parameters
3. Substrate screening – S6-S14
  - 3.1 Co-solvent screening
  - 3.2 Optimisation of 2'-Deoxy-5-ethynyluridine (**3**)
  - 3.3 Scale ups of pyrimidines
4. Protein Expression and Crystallisation – S14-S20
  - 4.1 Expression
  - 4.2 Purification
  - 4.3 Crystallisation
  - 4.4 Data collection and refinement
  - 4.5 Protease (Trypsin) digestion
5. Scope screening – S20-S51
  - 5.1 Pyrimidine SAR
  - 5.2 Purine SAR
  - 5.3 Scale up of Purines.
  - 5.4 <sup>15</sup>N labelling
6. References – S51-S53
7. Analytical section – S53-S157

## **1. General information**

### **1.1 Reagents and Solvents**

All reagents and solvents were used as supplied from commercial sources and used without any further purification unless otherwise specified. Solvents were all HPLC grade and used without any further purification, unless otherwise specified. Thin layer chromatography (TLC) was performed using Merck silica plates coated with fluorescent indicator UV254. TLC plates were analysed under 254 nm UV light or developed in p-Anisaldehyde. Normal-phase column chromatography was carried out using Fluorochem Silicagel 60 Å 40-63 µm. Normal phase auto column chromatography was carried out using Silicycle silicagel on an interchim puriflash XS520 plus.

### **1.2 NMR Spectroscopy**

NMR spectroscopy was carried out using a Bruker 400 UltraShield™ “Avance I” spectrometer. All chemical shifts ( $\delta$ ) in CDCl<sub>3</sub> were referenced at 7.26 ppm (1H) and 77.16 ppm (13C) and in DMSO-*d*<sub>6</sub> at 2.50 ppm (1H) and 39.52 ppm (13C). Chemical shifts are reported in parts per million (ppm) and coupling constants are quoted in hertz (Hz). Abbreviations for splitting patterns are s (singlet), d (doublet), t (triplet), q (quartet) and m (multiplet). App (apparent) denotes signals in which similar *J* values have resulted in false equivalence. All NMR data was processed using MestRenova 11.0.3 software.

### **1.3 Liquid Chromatography-Mass Spectrometry (LC-MS)**

LC-MS was carried out on an Agilent 1200 series HPLC instrument in conjunction with an Agilent Quadrupole mass detector 9 (HPLC Agilent Technologies 6130 Quadrupole), using an agilent Infinity Lab Poroshell 120, 4.6 x 100 mm, 2.7 µ C18 column. A combination of electrospray ionization (ESI) and atmospheric pressure chemical ionization (APCI) was used in all cases (MM-ES+APCI). The solvent system used was Acetonitrile/Water with 5 mM Ammonium Acetate buffer.

### **1.4 High-Pressure Liquid Chromatography (HPLC)**

HPLC analysis was performed on a Dionex Ultimate 300 instrument utilising the VWD3400 variable wavelength detector. Analytical reversed-phase HPLC (RP-HPLC) was carried out on

a Shimadzu Prominence instrument utilising a PDA Detector scanning from 190-600 nm. Semi-preparative RP-HPLC purification was carried out on a Dionex Ultimate 3000 series instrument using a 150 x 21.2 mm Kinetex 5  $\mu$ m C18 column.

## **2. General experimental techniques and procedures**

### **2.1 Preparation of stock solutions**

#### **100 mM Phosphate buffer solution pH 6**

1.84 g (13.7 mM) of  $\text{Na}_2\text{HPO}_4 \cdot 7\text{H}_2\text{O}$  and 5.96 g (86.3 mM) of  $\text{NaH}_2\text{PO}_4 \cdot \text{H}_2\text{O}$  were dissolved in 500 mL of mQ  $\text{H}_2\text{O}$ , adjusted using 0.2 mL of 1M HCL obtaining a final pH of 6.

#### **Sugar donor stock solution**

727 mg (3 mmol) of thymidine were dissolved in 30 mL of mQ  $\text{H}_2\text{O}$  to prepare a 100 mM solution. Solution was shaken by hand for 1 min to ensure full solubility of the thymidine.

682 mg (3 mmol) of deoxycytidine (**8**) were dissolved in 30 mL of mQ  $\text{H}_2\text{O}$  to prepare a 100 mM solution. Solution was shaken by hand for 1 min to ensure full solubility of the deoxycytidine (**8**). Sugar donor stock solution is stored at rt.

#### **Nucleobase stock solutions**

As an example, 11.5 mg of nucleobase 10 was dissolved using sonication in 1768  $\mu$ L of mQ  $\text{H}_2\text{O}$  to form a 50 mM solution. Nucleobase solution is stored at rt.

#### **NDT enzyme solution**

*Lactobacillus Leichmanii* NDT (L/NDT, N2665 Sigma-Aldrich, expressed in *E. coli*) stock solution was prepared by dissolving 0.921 mg of powder enzyme in 0.921 mL of 100 mM  $\text{Na}_2\text{HPO}_4$  and 20% glycerol (1 mg/mL). Solution stored in  $-18^\circ\text{C}$ . One unit of enzyme produces 1  $\mu$ M of hypoxanthine in 1 minute at  $40^\circ\text{C}$ , pH 6.0 (1.22 units/mg solid).

### **2.2 General Procedures**

#### **General Enzymatic Nucleoside Transglycosylation Procedure A**

A 50 mM nucleobase stock solution in mQ H<sub>2</sub>O (10.0 µmol, 200 µL, 1 equiv) was mixed with a 100 mM thymidine or deoxycytidine solution dissolved in mQ H<sub>2</sub>O (50.0 µmol, 500 µL, 5 equiv) and 298 µL extra of mQ H<sub>2</sub>O to afford a final volume of 1 mL. Next, 2 µL of NDT stock solution (2 µg/mL) was added and the resulting reaction mixture was shaken at 950 rpm at 40 °C for 24 h. Then, an aliquot of 100 µL of reaction mixture was transferred to a 1 mL HPLC vial, quenched with 100 µL of HFIP and diluted with 800 µL of 100 mM Na<sub>2</sub>HPO<sub>4</sub> buffer. The crude was analysed by analytical RP-HPLC, and conversion of the target nucleoside was calculated by monitoring the ratio of the peak area of starting material to peak area of product. Reactions were carried out in triplicate and conversions were expressed as the average with the corresponding standard deviation.

### 2.3 Analytical RP-HPLC method parameters

#### Method A

Column specification: Luna C18 Polar Omega 3 µ (100 x 4.6 µm)

Column temperature: 40 °C

Mobile phase A: 0.1% v/v TFA in water

Mobile phase B: 0.1% v/v TFA in Acetonitrile

Flow rate 1.5 mL/min

Gradient profile:

| Time (min) | % A | % B |
|------------|-----|-----|
| 0          | 99  | 1   |
| 0.5        | 99  | 1   |
| 4          | 88  | 12  |
| 6.5        | 50  | 50  |
| 7          | 5   | 95  |
| 8          | 5   | 95  |
| 9          | 99  | 1   |
| 11.30      | 99  | 1   |

Detection wavelength of 254 nm.

#### Method B

Column specification: Luna C18 Polar Omega 3 µ (100 x 4.6 µm)

Column temperature: 40 °C

Mobile phase A: 0.1% v/v TFA in water



Mobile phase D: Acetonitrile

Flow rate 1.5 mL/min

Gradient profile:

| Time (min) | % A | % D |
|------------|-----|-----|
| 0          | 95  | 5   |
| 8          | 40  | 60  |
| 8.5        | 5   | 95  |
| 11         | 5   | 95  |
| 11.5       | 95  | 5   |
| 14         | 95  | 5   |

Detection wavelength of 254 nm.

### Method C

Column specification: Phenomenex Luna C18 3  $\mu$  phenyl-hexyl (150 x 4.6 mm)

Column temperature: 40 °C

Mobile phase A: 0.1% v/v TFA in water

Mobile phase B: 0.1% v/v TFA in Acetonitrile

Flow rate 1.2 mL/min

Gradient profile:

| Time (min) | % A | % B |
|------------|-----|-----|
| 0          | 99  | 1   |
| 8          | 70  | 30  |
| 9          | 5   | 95  |
| 11         | 5   | 95  |
| 11         | 99  | 1   |
| 13         | 99  | 1   |

Detection wavelength of 254 nm.

## 2.4 RP-HPLC semi preparatory method parameters:

### Method D

Column specification: Kinetex 5  $\mu$ m XB-C18 100 Å, 150 x 21.2 mm Å

Column temperature: 40 °C

Mobile phase A: Water

Mobile phase B: Acetonitrile

Flow rate: 12 mL/min

| Time (min) | % A | % B |
|------------|-----|-----|
| 0          | 95  | 5   |
| 18         | 82  | 18  |
| 19         | 5   | 95  |
| 23         | 5   | 95  |
| 24         | 95  | 5   |
| 28         | 95  | 5   |

Detection wavelength of 254 nm.

### 3. Optimisation of the reaction conditions

#### 3.1 Co-solvent screening

Nucleobases **9** (purine) and **10** (pyrimidine) were prepared and analysed using the general enzymatic nucleoside transglycosylation procedure. The 50 mM nucleobase stock solution was dissolved in the various solvents investigated.

**Table S1** – Co-solvent screening with purine **9** and pyrimidine **10** The standard error was calculated through the standard deviation, N = 3.

| Entry | Co-Solvent<br>(20% v/v) | Nucleobase <b>9</b><br>Conversion (%) | Nucleobase <b>10</b><br>Conversion (%) |
|-------|-------------------------|---------------------------------------|----------------------------------------|
| 1     | H <sub>2</sub> O        | 98 ± 1                                | 48 ± 1                                 |
| 2     | PBS                     | 98 ± 1                                | 79 ± 1                                 |
| 3     | ACN                     | 20 ± 6                                | 9 ± 6                                  |
| 4     | DMSO                    | 98 ± 1                                | 78 ± 1                                 |
| 5     | MeOH                    | 98 ± 1                                | 80 ± 1                                 |
| 6     | EtOH                    | 98 ± 1                                | 84 ± 3                                 |
| 7     | IPA                     | 97 ± 1                                | 85 ± 2                                 |
| 8     | Acetone                 | 97 ± 1                                | 81 ± 5                                 |

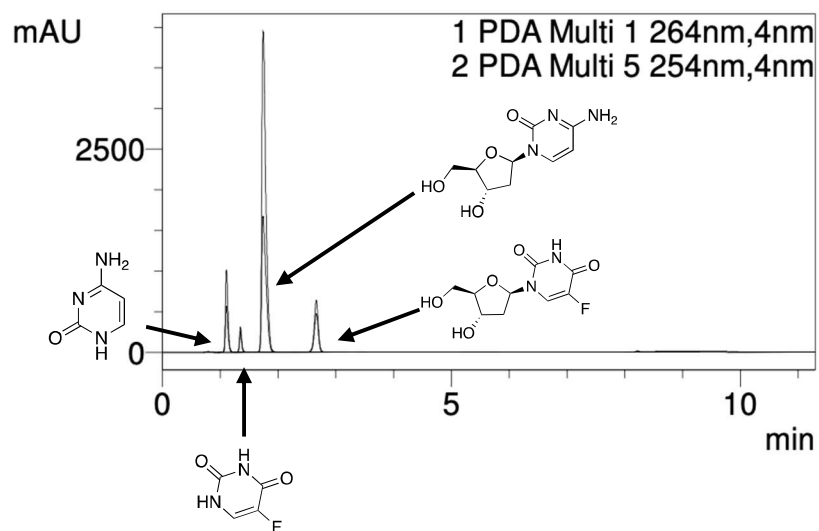

**Figure S1** - Representative example of the reaction forming nucleoside **12** in 20% MeOH v/v corresponding to entry 5 Table S1.

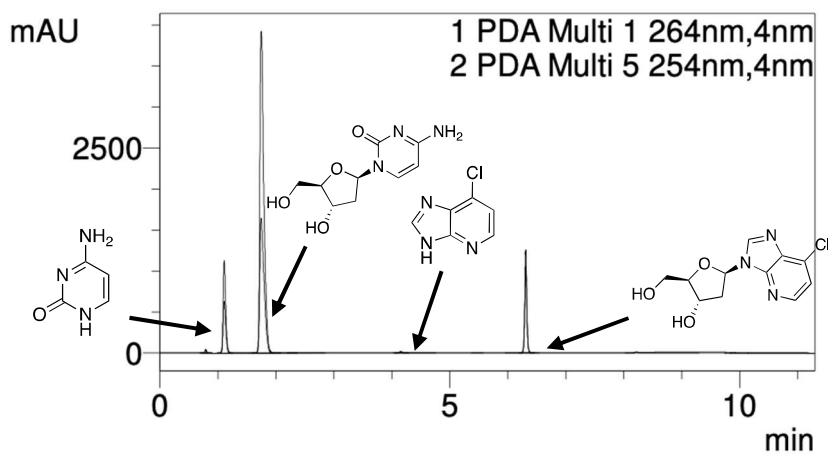

**Figure S2** - Representative example of the reaction forming nucleoside **11** in 20% MeOH v/v corresponding to entry 5 Table S1.

## 2'-Deoxy-deaza-6-chloropurine (11)

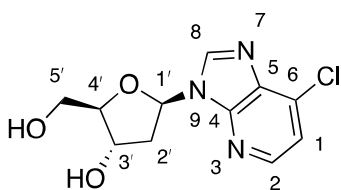

Prepared using the general enzymatic nucleoside transglycosylation procedure A. A 50 mM nucleobase stock solution (12 mg dissolved in 1563  $\mu\text{L}$ ) in mQ  $\text{H}_2\text{O}$  (10.0  $\mu\text{mol}$ , 200  $\mu\text{L}$ , 1 equiv) was mixed with a 100mM deoxycytidine solution (682 mg in 30 mL), which was dissolved in mQ  $\text{H}_2\text{O}$  (50.0  $\mu\text{mol}$ , 500  $\mu\text{L}$ , 5 equiv). Next, 298  $\mu\text{L}$  mQ  $\text{H}_2\text{O}$  solution was added alongside 2  $\mu\text{L}$  of NDT stock solution to afford a final volume of 1 mL and the resulting reaction mixture was shaken at 950 rpm at 40  $^\circ\text{C}$  for 24 h. The crude reaction mixture was purified by preparative HPLC (method D) affording 2'-deoxy-deaza-6-chloropurine (**11**).

**$^1\text{H}$  NMR** (400 MHz,  $\text{DMSO}-d_6$ , ppm)  $\delta$  8.77 (s, 1H,  $H^8$ ), 8.33 (d,  $J = 5.3$  Hz, 1H,  $H^1$  or  $H^2$ ), 7.48 (d,  $J = 5.3$  Hz, 1H,  $H^1$  or  $H^2$ ), 6.50 (dd,  $J = 7.3, 6.2$  Hz, 1H,  $H^1$ ), 5.33 (d,  $J = 4.2$  Hz, 1H,  $\text{OH}^3$ ), 5.01 (*app* t,  $J = 5.6$  Hz, 1H,  $\text{OH}^5$ ), 4.44 (*app* dq,  $J = 7.0, 3.5$  Hz, 1H,  $H^3$ ), 3.89 (*app* td,  $J = 4.5, 2.9$  Hz, 1H,  $H^4$ ), 3.62 (*app* dt,  $J = 11.7, 5.0$  Hz, 1H,  $H^{5'}$  or  $H^{5''}$ ), 3.53 (ddd,  $J = 11.8, 5.9, 4.5$  Hz, 1H,  $H^{5'}$  or  $H^{5''}$ ), 2.76 (ddd,  $J = 13.2, 7.4, 5.9$  Hz, 1H,  $H^{2'}$  or  $H^{2''}$ ), 2.34 (ddd,  $J = 13.2, 6.2, 3.4$  Hz, 1H,  $H^{2'}$  or  $H^{2''}$ ).

$^1\text{H}$  NMR in agreement with literature values<sup>1</sup>

**$^{13}\text{C}\{^1\text{H}\}$ -NMR** (101 MHz,  $\text{DMSO}-d_6$ , ppm)  $\delta$  147.1 ( $\text{C}^4$ ), 144.5 ( $\text{C}^1$  or  $\text{C}^2$ ), 143.7 ( $\text{C}^8$ ), 133.2 ( $\text{C}^4$  or  $\text{C}^5$ ), 133.0 ( $\text{C}^4$  or  $\text{C}^5$ ), 118.7 ( $\text{C}^1$  or  $\text{C}^2$ ), 87.9 ( $\text{C}^{4'}$ ), 83.9 ( $\text{C}^{1'}$ ), 70.6 ( $\text{C}^{3'}$ ), 61.6 ( $\text{C}^{5'}$ ).  $\text{C}^{2'}$  peak hidden by DMSO peak confirmed through 2D NMR.

**RP-HPLC** (Method A):  $t_R = 6.38$  min, 98% conversion (std = 0.2)

**HRMS** (ESI)  $m/z$ :  $[\text{M}+\text{H}]^+$  calcd for  $\text{C}_{11}\text{H}_{13}\text{ClN}_3\text{O}_3$  270.0640; found, 270.0632.

## 2'-Deoxy-5-fluorouracil (12)

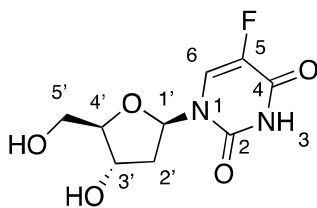

Prepared using the general enzymatic nucleoside transglycosylation procedure. A 50 mM nucleobase stock solution (11.5 mg dissolved in 1768  $\mu\text{L}$ ) in mQ  $\text{H}_2\text{O}$  (10.0  $\mu\text{mol}$ , 200  $\mu\text{L}$ , 1 equiv) was mixed with a 100mM deoxycytidine solution (227 mg in 10 mL), which was dissolved in mQ  $\text{H}_2\text{O}$  (100.0  $\mu\text{mol}$ , 500  $\mu\text{L}$ , 10 equiv). Next, 298  $\mu\text{L}$  mQ  $\text{H}_2\text{O}$  solution was added alongside 2  $\mu\text{L}$  of NDT stock solution to afford a final volume of 1 mL and the resulting reaction mixture was shaken at 950 rpm at 40  $^{\circ}\text{C}$  for 24 h. The crude reaction mixture was purified by preparative HPLC (method D) affording 2'-deoxy-5-fluorouracil (**12**) for characterisation.

**RP-HPLC** (Method A):  $t_{\text{R}}$  = 2.62 min, 78 % conversion (std = 1).

Characterisation of the target nucleoside was confirmed through  $^1\text{H}$  NMR in comparison with the large-scale characterisation.

### 3.2 2'-Deoxy-5-ethynyluridine (**3**) optimisation

2'-Deoxy-5-ethynyluridine (**3**) optimisation reactions were prepared and analysed using the general enzymatic nucleoside transglycosylation procedure A. The 50 mM nucleobase stock solution was dissolved in ethanol (12 mg dissolved in 1763  $\mu\text{L}$  of ethanol) and the 100 mM deoxycytidine solution was adjusted to match the equivalents used in the optimisation study. 10 equivalents of deoxycytidine used a 200 mM stock solution, 20 equivalents of deoxycytidine used a 400 mM stock solution. The stock solutions were dissolved in mQ  $\text{H}_2\text{O}$  (for 100 mM stock, 50.0  $\mu\text{mol}$ , 500  $\mu\text{L}$ , 5 equiv).

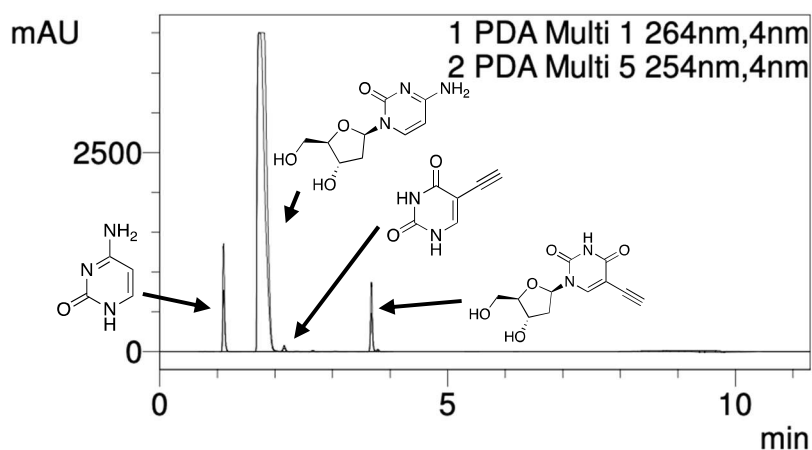

**Figure S3** - Representative HPLC example of entry 8 Figure 2 (C) forming nucleoside **3**.

#### 2'-Deoxy-5-ethynyl-2'-deoxyuridine (**3**)

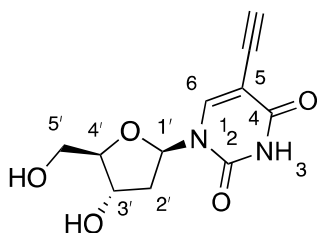

Compound **3** was prepared using the general enzymatic nucleoside transglycosylation procedure A. 50 mM nucleobase stock solution (10.7 mg dissolved in 1683  $\mu$ L) in EtOH (10.0  $\mu$ mol, 200  $\mu$ L, 1 equiv) was mixed with a 400mM deoxycytidine solution (908 mg in 10 mL), which was dissolved in mQ H<sub>2</sub>O (200.0  $\mu$ mol, 500  $\mu$ L, 20 equiv). Next, 296  $\mu$ L mQ H<sub>2</sub>O solution was added alongside 4  $\mu$ L of NDT stock solution to afford a final volume of 1 mL and the resulting reaction mixture was shaken at 950 rpm at 40 °C for 24 h. The crude reaction mixture was analysed by RP-HPLC and purified by preparative HPLC (method D) affording nucleoside **3** for characterisation.

**RP-HPLC** (Method A):  $t_R$  = 3.60 min, 90 % conversion (std = 1).

Characterisation of the target nucleoside was confirmed through <sup>1</sup>H NMR in comparison with the large-scale characterisation.

### 3.3 Scale up of pyrimidines.

### 2'-Deoxy-5-ethynyluridine (**3**)

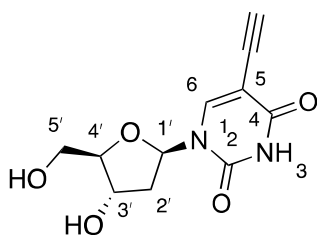

Deoxycytidine (2.27 g, 10 mmol, 10 equiv) and 5-ethynyluracil (**13**) (136 mg, 1 mmol, 1 equiv) were dissolved in 100 mL of mQ H<sub>2</sub>O. The solution was left stirring for an hour at 40 °C before 400  $\mu$ L of enzyme stock were added. The reaction was stirred for 24 h at 40 °C. The solvent was evaporated *in vacuo*, dry loaded onto silica and purified by flash column chromatography (silica gel, 0-40% CH<sub>2</sub>Cl<sub>2</sub>/MeOH) to obtain nucleoside **3** in 52% yield (132 mg, 0.52 mmol) as a white solid.

**<sup>1</sup>H NMR** (400 MHz, DMSO-*d*<sub>6</sub>, ppm)  $\delta$  11.60 (s, 1H, NH), 8.28 (s, 1H, H<sup>6</sup>), 6.10 (*app* t, *J* = 6.5 Hz, 1H, H<sup>1'</sup>), 5.23 (d, *J* = 4.3 Hz, 1H, OH<sup>3'</sup>), 5.11 (*app* t, *J* = 4.9 Hz, 1H, OH<sup>5'</sup>), 4.26 – 4.21 (m, 1H, H<sup>3'</sup>), 4.08 (s, 1H, C<sup>5</sup>CCH), 3.79 (*app* q, *J* = 3.3 Hz, 1H, H<sup>4'</sup>), 3.62 (ddd, *J* = 11.9, 5.0, 3.3 Hz, 1H, H<sup>5'</sup> or H<sup>5''</sup>), 3.56 (ddd, *J* = 11.8, 4.9, 3.4 Hz, 1H, H<sup>5'</sup> or H<sup>5''</sup>), 2.17-2.10 (*m*, 2H, H<sup>2'</sup> and H<sup>2''</sup>).

<sup>1</sup>H NMR in agreement with literature values<sup>2</sup>

**<sup>13</sup>C{<sup>1</sup>H}-NMR** (101 MHz, DMSO-*d*<sub>6</sub>, ppm)  $\delta$  161.6 (C<sup>4</sup>), 149.4 (C<sup>2</sup>), 144.5(C<sup>6</sup>), 97.6 (C<sup>5</sup>C), 87.6(C<sup>4'</sup>), 84.8(C<sup>1'</sup>), 83.5(C<sup>5</sup>CCH), 76.4(C<sup>5</sup>), 70.0(C<sup>3'</sup>), 60.8(C<sup>5'</sup>), 40.2(C<sup>2'</sup>).

**RP-HPLC** (Method A): *t*<sub>R</sub> = 3.60 min, 82% conversion

**IR**  $\nu_{\text{max}}$  (cm<sup>-1</sup>): 3247(C $\equiv$ C-H stretch), 1680 (C=O stretch)

**HRMS** (ESI) *m/z*: [M+Na]<sup>+</sup> calcd for C<sub>11</sub>H<sub>12</sub>N<sub>2</sub>O<sub>5</sub>Na 275.0638; found, 275.0636

### 2'-Deoxy-5-fluorouridine (**12**)

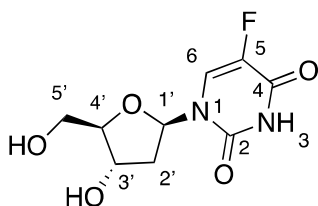

Deoxycytidine (1.14 g, 5 mmol, 5 equiv) and 5-fluorouracil (130 mg, 1 mmol, 1 equiv) were dissolved in 100 mL of mQ H<sub>2</sub>O. The solution was left stirring for an hour at 40 °C before 200  $\mu$ L of enzyme were added. The reaction was stirred for 24 h at 40 °C. The crude residue was concentrated *in vacuo*, dry loaded onto silica and purified by flash column chromatography (silica gel, 0-40% CH<sub>2</sub>Cl<sub>2</sub>/MeOH) to obtain nucleoside (**12**) in 56% yield as a white solid (137 mg, 1.0 mmol).

**<sup>1</sup>H NMR** (400 MHz, DMSO-*d*<sub>6</sub>, ppm)  $\delta$  11.80 (s, 1H, NH), 8.21 (d, *J* = 7.2 Hz, 1H, *H*<sup>6</sup>), 6.12 (*app* td, *J* = 6.6, 2.0 Hz, 1H, *H*<sup>1'</sup>), 5.23 (d, *J* = 4.3 Hz, 1H, OH<sup>3'</sup>), 5.13 (*app* t, *J* = 5.0 Hz, 1H, OH<sup>5'</sup>), 4.23 (*app* dt, *J* = 7.7, 3.8 Hz, 1H, *H*<sup>3'</sup>), 3.78 (*app* q, *J* = 3.3 Hz, 1H, *H*<sup>4'</sup>), 3.62 (ddd, *J* = 12.6, 5.4, 3.8 Hz, 1H, *H*<sup>5'</sup> or *H*<sup>5''</sup>), 3.56 (ddd, *J* = 11.9, 4.9, 3.5 Hz, 1H, *H*<sup>5'</sup> or *H*<sup>5''</sup>), 2.14-2.06 (*m*, 2H, *H*<sup>2'</sup> and *H*<sup>2''</sup>).

<sup>1</sup>H NMR in agreement with literature values<sup>3</sup>

**<sup>13</sup>C{<sup>1</sup>H}-NMR** (101 MHz, DMSO-*d*<sub>6</sub>, ppm)  $\delta$  157.0 (d, *J* = 26.3 Hz, C<sup>4</sup>), 149 (C<sup>2</sup>), 139.9 (d, *J* = 230.0 Hz C<sup>5</sup>), 124.7 (d, *J* = 34.3 Hz, C<sup>6</sup>), 87.48 (C<sup>4'</sup>), 84.52 (C<sup>1'</sup>), 70.11 (C<sup>3'</sup>), 61.00(C<sup>5'</sup>). C<sup>2'</sup> peak hidden by DMSO peak confirmed through 2D NMR.

**<sup>19</sup>F NMR** (471 MHz, DMSO, ppm)  $\delta$  -167.2.

**RP-HPpLC** (Method A): *t*<sub>R</sub> = 2.62 min, 80% conversion.

**HRMS** (ESI) *m/z*: [M+H]<sup>+</sup> calcd for C<sub>9</sub>H<sub>12</sub>FN<sub>2</sub>O<sub>5</sub>, 269.0544; found, 269.0536.

## 2'-Deoxy-5-Azidomethyluridine (**15**)

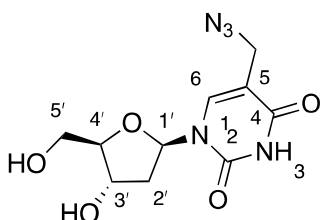

Deoxycytidine (1.36 g, 5.98 mmol, 10 equiv) and 5-(azidomethyl)pyrimidine-2,4(1*H*,3*H*)-dione (100 mg, 0.6 mmol, 1 equiv) were dissolved in 50 mL of 2 mM Na<sub>2</sub>HPO<sub>4</sub> pH 6. The solution was left stirring for an hour at 40 °C before 200  $\mu$ L of enzyme were added. The reaction was stirred for 24 h at 40 °C. The crude residue was concentrated *in vacuo*, dry loaded onto silica



and purified by flash column chromatography (silica gel, 0-12% CH<sub>2</sub>Cl<sub>2</sub>/MeOH) to obtain the target compound (**15**) in 31% yield (53 mg, 0.6 mmol) as a white solid.

Characterisation of the target nucleoside was confirmed through <sup>1</sup>H NMR in comparison with the small-scale characterisation.

### 2'-Deoxy-5-iodouridine (**14**)

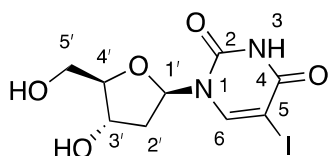

Deoxycytidine (2.86 g, 12.6 mmol, 3 equiv) and 5-iodouracil (1.00 g, 4.2 mmol, 1 equiv) were dissolved in 300 mL of mQ H<sub>2</sub>O. The solution was left stirring for an hour at rt before 600 μL of enzyme were added. The reaction was stirred for 24 h at rt. The crude residue was concentrated *in vacuo*, loaded onto silica and purified by flash column chromatography (silica gel, 0-20% CH<sub>2</sub>Cl<sub>2</sub>/MeOH) to obtain the target compound (**14**) in 56% yield (840 mg, 4.2 mmol) as a white solid.

Characterisation of the target nucleoside was confirmed through <sup>1</sup>H NMR in comparison with the small-scale characterisation.

### 2'-Deoxy-5-nitrouridine (**20**)

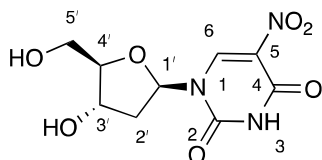

Deoxycytidine (788 mg, 3.18 mmole, 5 equiv) and 5-nitrouacil (100 mg, 0.64 mmol, 1 equiv) were dissolved in 64 mL of mQ H<sub>2</sub>O. The solution was left stirring for an hour at 40 °C before 128 μL of enzyme were added. The reaction was stirred for 24 h at 40 °C. The crude residue was concentrated *in vacuo*, loaded onto silica, and purified by flash column chromatography (silica gel, 0-40% (CH<sub>2</sub>Cl<sub>2</sub>/MeOH) to obtain to obtain compound 5-nitrouridine (**20**) in 22% yield as a white solid (37 mg, 0.14 mmol).

**<sup>1</sup>H NMR** (400 MHz, DMSO-*d*<sub>6</sub>, ppm): δ 12.01 (s, 1H, NH), 9.49 (s, 1H, C<sup>6</sup>), 6.06 (*app* t, *J* = 5.9 Hz, 1H, *H*<sup>1'</sup>), 5.29 (d, *J* = 4.5 Hz, OH<sup>3'</sup>), 5.24 (*app* t, *J* = 4.4 Hz, 1H, OH<sup>5'</sup>), 4.31 – 4.20 (m, 1H,

$H^{3'}$ ), 3.89 (*app* q,  $J = 3.4$  Hz, 1H,  $H^{4'}$ ) 3.69 (ddd,  $J = 11.8, 4.5, 3.2$  Hz, 1H,  $H^{5'}$  or  $H^{5''}$ ), 3.60 (ddd,  $J = 11.9, 4.5, 3.1$  Hz, 1H,  $H^{5'}$  or  $H^{5''}$ ), 2.30 - 2.24 (*m*, 2H,  $H^{2'}$  and  $H^{2''}$ ).

$^1\text{H}$  NMR in agreement with literature values<sup>4</sup>

$^{13}\text{C}\{^1\text{H}\}$ -NMR (101 MHz, DMSO- $d_6$ , ppm):  $\delta$  154.8 ( $C^4$ ), 148.7 ( $C^2$ ), 145.4 ( $C^6$ ), 125.4 ( $C^5$ ), 88.0 ( $C^4$ ), 86.5 ( $C^{1'}$ ), 69.1 ( $C^3$ ), 60.1 ( $C^5$ ), 40.8 ( $C^{2'}$ ).

**RP-HPLC** (Method A):  $t_R = 3.28$  min, 38% conversion

**IR**  $\nu_{\max}$  ( $\text{cm}^{-1}$ ): 1717 (N=O stretch).

**HRMS** (ESI)  $m/z$ :  $[M+Na]^+$  calcd for  $C_9H_{11}O_7N_3Na$ , 296.0489; found, 296.0488.

## 4. Protein expression and Purification

### 4.1 Expression

The coding sequence for the wild type *Lactobacillus leichmannii* NDT (Uniprot: Q9R5V5) with an N-terminal 6-His tag, was synthesized by GenScript (with codon optimization for *Escherichia coli*) and subcloned into a pET29a+ plasmid. The plasmids were received from GenScript in the lyophilised form. Plasmid DNA was resuspended in nuclease -free water (6  $\mu\text{L}$ ) according to manufacturer protocol.

Amino acid sequence of protein used in this work:

GSSHHHHHHSSGLEVLFGQPAMPKKTIFYGAGWFTDRQNKAYKEAMEALKENPTIDLENSY  
VPLDNQYKGIRVDEHPEYLDKVVWATATYNNDLNGIKTNDIMLGVIYIPDEEDVGLGMELGYA  
LSQGKYVLLVIPDEDYGKPINLMSWGVSDNVIKMSQLKDFNFKPRFDFYEGAVY\*

Plasmid (0.8  $\mu\text{L}$ ) containing target gene pET29a+-NDT was transformed into BL21 (DE3) *E. coli* competent cells (Invitrogen) using the heat shock method. Transformants harbouring the plasmid were plated on LB agar containing 50  $\mu\text{g}/\text{mL}$  kanamycin and incubated at 37 °C overnight. Colonies were inoculated into 10 mL LB media containing 50  $\mu\text{g}/\text{mL}$  kanamycin and grown overnight at 37 °C while shaking gently at 200 rpm. Overnight transformants were used to inoculate 450 mL of LB media supplemented with 50  $\mu\text{g}/\text{mL}$  kanamycin into an OD of 0.01 and incubated at 37 °C, 200 rpm until reaching an OD of ~0.4. When OD reached ~0.4

cells were induced with IPTG (0.5 mM, 2.5 mL) solution for 3 hours.. The cells were harvested by centrifugation (10,000 x g for 20 min at 4 °C) and the supernatant was discarded. The cell pellet was resuspended in 10 mM sodium phosphate buffer pH 7 (~10 mL buffer per 1 g of cell pellet). The resuspended cell pellets were lysed using a French press. The resulting cell lysate was separated by centrifugation (10,000 g, 30 mins, 4 °C) and the supernatant collected.

## 4.2 Purification

Binding Buffer (Buffer A): 10 mM sodium phosphate, 10 mM imidazole, 100 mM NaCl, pH 7.0

Binding Buffer (Buffer B): 10 mM sodium phosphate, 500 mM imidazole, 100 mM NaCl, pH 7.0.

The collected supernatant was filtered through a 0.45 µm PES filter and the proteins were purified by affinity chromatography. A 5 mL HisTrap FF column (GE Healthcare 17525501) was fitted on an Akta Pure protein purification system and equilibrated with 5 column volumes (CV) of binding buffer A before the supernatant of the cell lysate was loaded on to the column. The flow-through was collected as the non-absorbed fraction (NAF). The column was then washed with binding buffer A for 13 CV and when the UV absorbance was stable the protein was eluted with a gradient of imidazole (Buffer B 0-100%) over 17 CV. The fractions were analysed by SDS-PAGE.

General SDS-PAGE conditions involved mixing the sample with appropriate amount of 4X SDS dye and loaded into wells of Novex™ 4-20% Tris-Glycine Mini-Gels 50:50. Gels were run in 1x running buffer for 60 minutes at 140 V. SDS-PAGE gels were stained in Coomassie Blue for 1 hour prior to de-staining overnight at room temperature, on a shaking-platform.

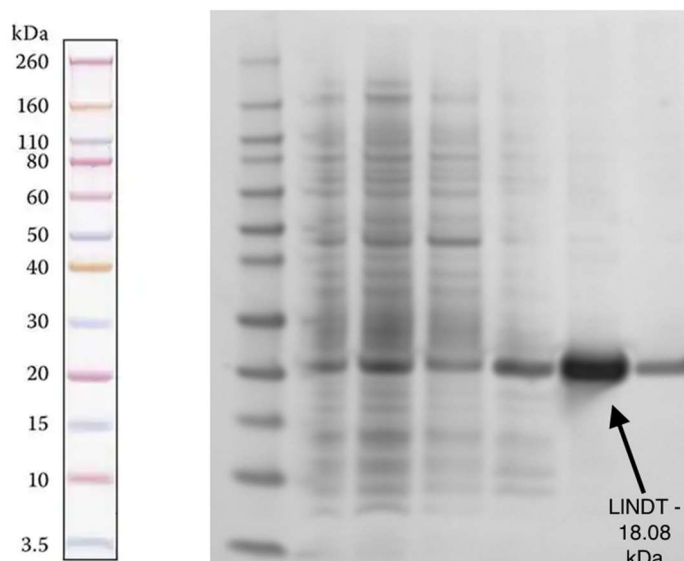

**Figure S4** – HisTRAP FF SDS PAGE gel – lane order, Marker, flow through, flow through, column wash, pure NDT fraction, pure NDT fraction, post fraction wash out.

Appropriate fractions were pooled together, and 200  $\mu$ L (400 units) of HRV 3C protease was added and dialysed over 48 hours at 4 °C into 20 mM sodium phosphate, 100 mM NaCl, pH 7.0 for histag removal. Histag cleavage was monitored and analysed by SDS-PAGE. Once his cleavage was complete, fractions were pooled and loaded onto a 5 mL HisTrap FF column (GE Healthcare 17525501) using a Akta Pure protein purification system. The system was once again equilibrated with 5 column volumes of binding buffer A before loading of the pooled fractions. The flow-through was collected as the non-absorbed fraction containing the cleaved LINDT protein. This was confirmed once again by SDS-PAGE, before appropriate fractions were applied to a 5,000 MW Amicon Centrifugal filter unit to be concentrated (10 mg/mL) and calculated by nanodrop.

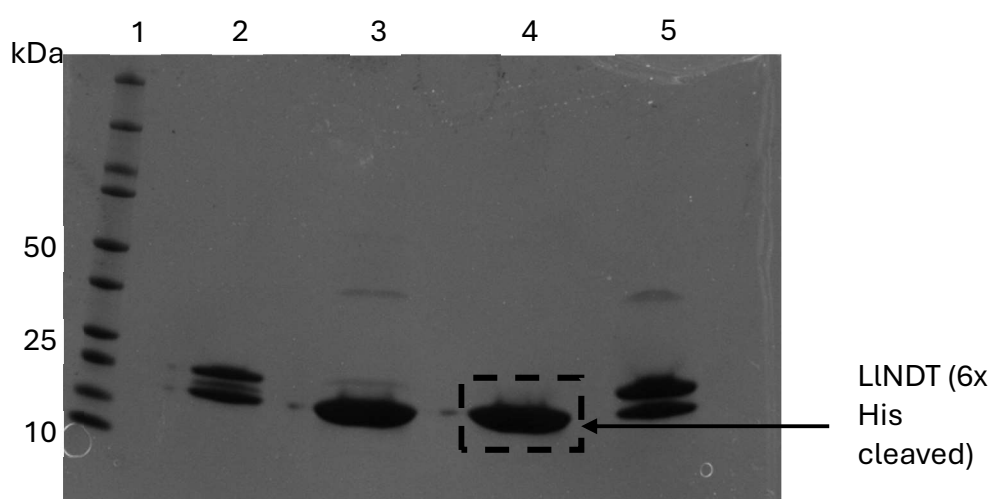

**Figure S5** – SDS PAGE gel – lane order: 1 = ladder, 2 = HRV 3C protease histag removal after 24 hours, 3 = HRV 3C protease histag removal after 48 hours, 4 = pooled fractions after the second IMAC following histag removal, 5= HRV 3C protease histag removal after 30 hours.

For crystallization studies, pooled fractions were additionally purified by SEC using the following protocol (SEC buffer: 20 mM sodium phosphate, 100 mM NaCl, pH 7.0). A Superdex 200 prep grade 16/60 Size Exclusion chromatography (SEC) column was equilibrated with SEC buffer and loaded with 2.5 mL aliquots of the HisTrap concentrate (10 mg/mL). The column was eluted with SEC buffer with 1 mL fractions collected and analysed by SDS-PAGE. Fractions containing NDT were concentrated using a 5,000 MW Amicon Centrifugal filter unit to 1.5 mL at a concentration of 21 mg/mL, with 0.75 mL in 10 % glycerol (20 mM sodium

phosphate, 100 mM NaCl, pH 7.0) and an alternative 0.75 mL in 20 mM sodium phosphate, 100 mM NaCl, pH 7.0. This was flash frozen with N<sub>2</sub> (l) and stored at 20°C.

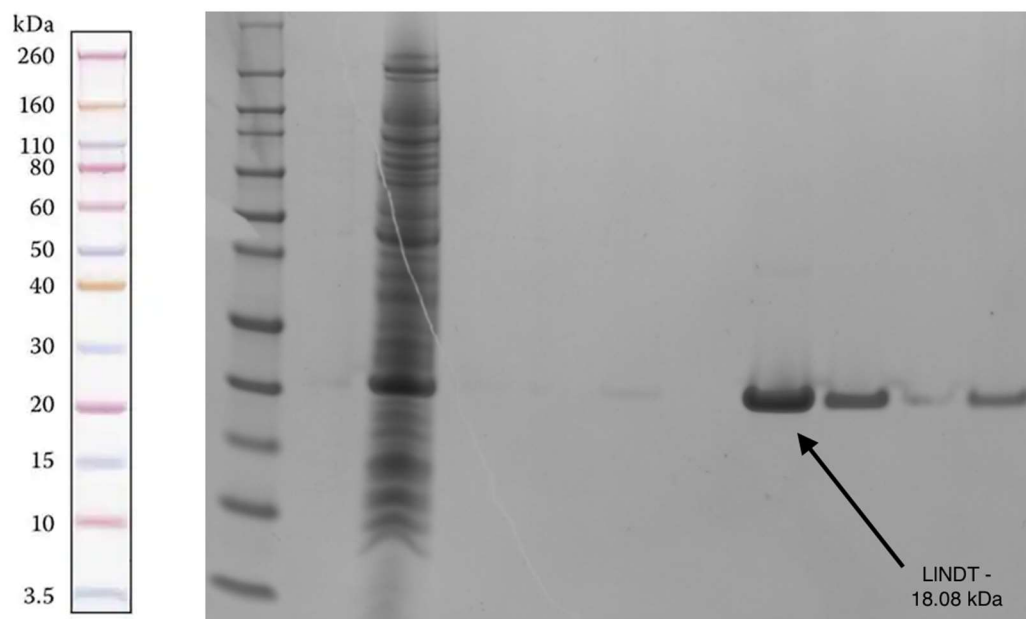

**Figure S6** - Size exclusion chromatography (SEC) SDS PAGE gel – lane order, blank, HisTrap flow through, blank, HisTrap elution, blank, SEC pure fraction, SEC pure fraction, blank, SEC pure fraction.

### 4.3 Crystallisation

Purified LLNDT was concentrated to 10 mg mL<sup>-1</sup> and this was screened for crystallisation in 96 well-plate format against a number of commercially available crystallization screens using a Mosquito robot (SPT Labtech), which was programmed to deliver drop volumes of 150 nL protein plus 150 nL precipitant solution. Crystals were obtained in several different conditions. Crystals for Dataset #1 (*apo*-) were obtained from drops containing 20 mM NaH<sub>2</sub>PO<sub>4</sub> buffer at pH 7.0 with 0.2 M sodium citrate and 20% (w/v) PEG 3350. Crystals for Dataset #2 (compound **3**) were obtained from conditions containing 35% tascimate, again at pH 7.0. Crystals for Dataset #3 (compound **50**) were obtained from conditions containing 0.2 M sodium citrate tribasic dehydrate and 20% (w/v) PEG 3350 again at pH 7.0. Substrate soaks for crystals yielding Datasets #2 and #3 were obtained by incubating crystals for 4 h in their mother liquor containing 10 mM ligand, which had in each case been derived from a 100 mM stock in DMSO.

### 4.4 Data Collection and Refinement

The datasets described were collected at the Diamond Light Source, Didcot, Oxfordshire U.K. on beamline I03. Data were processed and integrated using XDS<sup>5</sup> and scaled using SCALA<sup>6</sup> included in the Xia2 processing system<sup>7</sup>. Data collection statistics are provided in **Table S2**. Crystals for all Datasets were obtained in space group  $I3_12$ , with approximately the same cell dimensions and with two molecules in the asymmetric unit that constituted one third of the LLNDT hexamer. The solvent content in the crystals was approximately 67% in each case. The structures of LLNDT were solved by molecular replacement using MOLREP<sup>8</sup> with the monomer of LLNDT (PDB code 1F8Y<sup>9</sup>) as the model. The structures were built and refined using iterative cycles in Coot<sup>10</sup> and REFMAC<sup>11</sup>, employing local NCS restraints in the refinement cycles. Following building and refinement of the protein and water molecules in the structural complexes obtained from Datasets #2 and #3, residual density was observed in the omit maps at the active sites. For Dataset #2, this could be modelled as the deoxyribosyl intermediate covalently bonded to E98; for dataset #3 density in subunit A was modelled as 2-deoxycytidine (**8**); in subunit B it was modelled as the deoxyribosyl intermediate covalently bonded to E98 and also two overlapping molecules of 7-Bromo-1H-imidazo[4,5-b]pyridine (**17**).

The final structures obtained from Datasets #1, #2 and #3 exhibited  $R_{\text{cryst}}/R_{\text{free}}$  values of 0.18/0.23, 0.20/0.23 and 0.19/0.21 respectively. Refinement statistics for the structures are presented in **Table S2**. The coordinates and structure factors for Datasets #1, #2 and #3 have been deposited in the Protein Databank as **apo-LLNDT (PDB code 9EZK)**, **LLNDT-deoxyribose (PDB code 9F08)** and **LLNDT-deoxycytidine-deoxyribose-7-Bromo-1H-imidazo[4,5-b]pyridine, respectively (PDB code 9F09)**.

**Table S2** - Data collection and refinement statistics for LLNDT. Numbers in brackets refer to data for highest resolution shells.

|                | Dataset #1<br><b>apo-LLNDT</b> | Dataset #2<br><b>LLNDT with<br/>deoxyribose (16)</b> | Dataset #3<br><b>LLNDT with<br/>deoxyxycytidine,<br/>deoxyribose and 7-<br/>Bromo-1H-<br/>imidazo[4,5-<br/>b]pyridine (17)</b> |
|----------------|--------------------------------|------------------------------------------------------|--------------------------------------------------------------------------------------------------------------------------------|
| Beamline       | I03                            | I03                                                  | I03                                                                                                                            |
| Wavelength (Å) | 0.976277                       | 0.976277                                             | 0.976269                                                                                                                       |
| Resolution (Å) | 60.94-2.79 (2.94-2.79)         | 60.61 – 2.37 (2.46-2.37)                             | 60.78 – 2.37 (2.46-2.37)                                                                                                       |

|                                                 |                                                                |                                                                |                                                                |
|-------------------------------------------------|----------------------------------------------------------------|----------------------------------------------------------------|----------------------------------------------------------------|
| Space Group                                     | $I3_12$                                                        | $I3_12$                                                        | $I3_12$                                                        |
| Unit cell (Å)                                   | $a = b = c = 149.27$ ; $\alpha = \beta = \gamma = 90.00^\circ$ | $a = b = c = 148.46$ ; $\alpha = \beta = \gamma = 90.00^\circ$ | $a = b = c = 148.88$ ; $\alpha = \beta = \gamma = 90.00^\circ$ |
| No. of molecules in the asymmetric unit         | 2                                                              | 2                                                              | 2                                                              |
| Unique reflections                              | 13954 (2028)                                                   | 22224 (2312)                                                   | 22441 (2337)                                                   |
| Completeness (%)                                | 100.0 (100.0)                                                  | 100.0 (100.0)                                                  | 100.0 (100.0)                                                  |
| $R_{\text{merge}}$ (%)                          | 0.15 (2.20)                                                    | 0.06 (0.96)                                                    | 0.09 (1.48)                                                    |
| $R_{\text{p.i.m.}}$                             | 0.03 (0.49)                                                    | 0.01 (0.22)                                                    | 0.02 (0.32)                                                    |
| Multiplicity                                    | 40.8 (40.0)                                                    | 41.2 (38.5)                                                    | 41.7 (43.5)                                                    |
| $\langle I/\sigma(I) \rangle$                   | 22.6 (2.3)                                                     | 42.5 (5.1)                                                     | 33.3 (3.6)                                                     |
| Overall $B$ from Wilson plot ( $\text{\AA}^2$ ) | 75                                                             | 61                                                             | 56                                                             |
| $CC_{1/2}$                                      | 1.00 (0.82)                                                    | 1.00 (0.95)                                                    | 1.00 (0.91)                                                    |
| $R_{\text{cryst}}/R_{\text{free}}$ (%)          | 0.18/0.23                                                      | 0.20/0.23                                                      | 0.19/0.21                                                      |
| r.m.s.d 1-2 bonds (Å)                           | 0.008                                                          | 0.007                                                          | 0.008                                                          |
| r.m.s.d 1-3 angles ( $^\circ$ )                 | 1.820                                                          | 1.646                                                          | 1.695                                                          |
| Avg main chain $B$ ( $\text{\AA}^2$ )           | 78                                                             | 64                                                             | 58                                                             |
| Avg side chain $B$ ( $\text{\AA}^2$ )           | 84                                                             | 69                                                             | 67                                                             |
| Avg waters $B$ ( $\text{\AA}^2$ )               | 66                                                             | 59                                                             | 58                                                             |
| Avg Ligand $B$ ( $\text{\AA}^2$ )               | -                                                              | 62                                                             | 68                                                             |

#### 4.5 Protease (trypsin) digestion

SDS gel bands corresponding to the expressed WT NDT and the commercial NDT (Sigma-Aldrich N2665) were excised at the MW marker of 18 kDa corresponding to the single monomer mass of NDT. Trypsin digestion and resulting peptide analysis was carried out by the mass spectrometry and proteomics facility at The University of St Andrews.

The results obtained from the trypsin digestion were contrasted against the amino acid sequence from LINDT.

MPKKTIYFGAGWFTDRQNKAYKEAMEALKENPTIDLENSYVPLDNQYKGIRVDEHPEYLHD  
 KVWATATYNNDLNGIKTNDIMLGVIYIPDEEDVGLGMELGYALSQGGKYVLLVIPDEEDYGKPINL  
 MSWGVSDNVIKMSQLKDFNFKPRDFYEGAVY.

Both gel bands matched the same amino acid sequence corresponding with the provided LINDT.

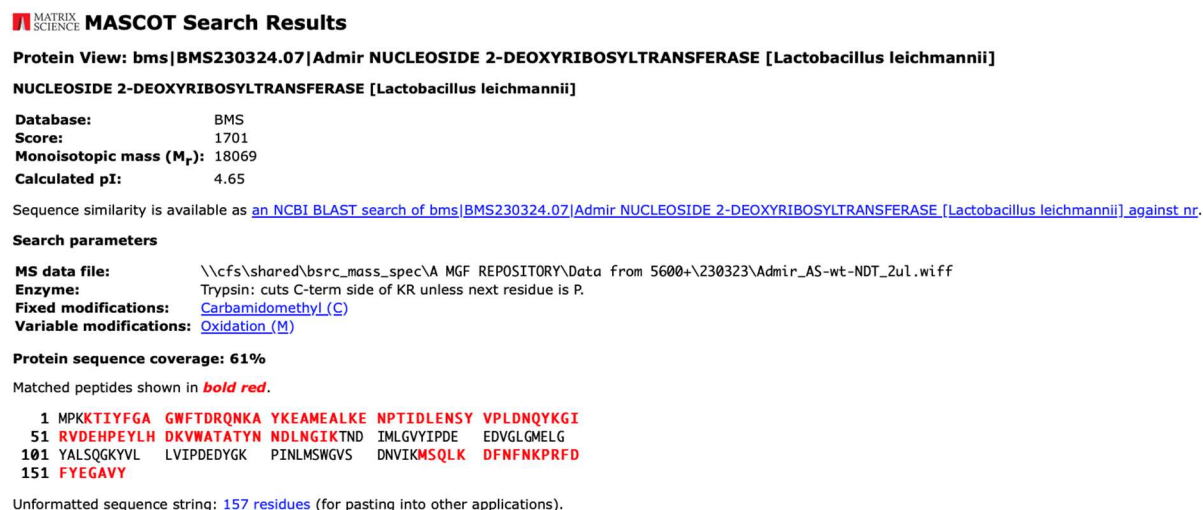

**Figure S7** - Sequence coverage of 61% for the WT L/NDT (expressed using IPTG) (emPAI score of 89.39).

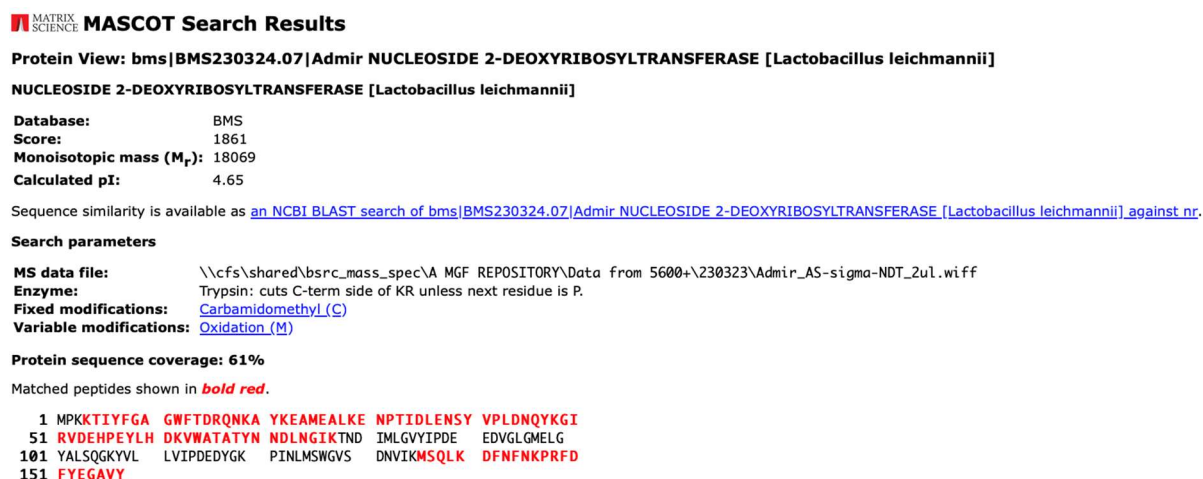

**Figure S8** - Sequence coverage of 61% for the L/NDT (Sigma-Aldrich) (emPAI score of 82.68).

## 5. Scope Screening

### 5.1 Pyrimidine SAR

#### 2'-Deoxy-5-hydroxymethyluridine (18)



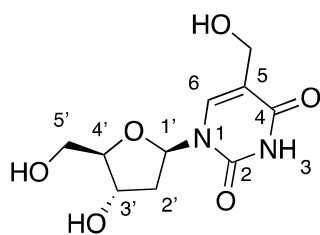

Prepared using the general enzymatic nucleoside transglycosylation procedure. A 50 mM nucleobase stock solution (28.8 mg dissolved in 4.05 mL) in mQ H<sub>2</sub>O (10.0 μmol, 200 μL, 1 equiv) was mixed with a 100 mM deoxycytidine solution (682 mg in 30 mL), which was dissolved in mQ H<sub>2</sub>O (50.0 μmol, 500 μL, 5 equiv). Next, 298 μL mQ H<sub>2</sub>O solution was added alongside 2 μL of NDT stock solution to afford a final volume of 1 mL and the resulting reaction mixture was shaken at 950 rpm at 40 °C for 24 h. The crude reaction mixture was purified by preparative HPLC (method D) affording nucleoside 2'-deoxy-5-hydroxymethyluridine (**18**).

**<sup>1</sup>H NMR** (400 MHz, DMSO-*d*<sub>6</sub>, ppm) δ 11.30 (s, 1H, NH), 7.72 (d, *J* = 1.3 Hz, 1H, H<sup>6</sup>), 6.19 (*app* t, *J* = 6.9 Hz, 1H, H<sup>1'</sup>), 5.24 (*br* s, 1H, OH<sup>3'</sup>), 4.95 (*br* s, 1H, OH<sup>5'</sup>), 4.89 (s, 1H, C<sup>5</sup>CH<sub>2</sub>OH), 4.23 (*app* dt, *J* = 6.5, 3.3 Hz, 1H, H<sup>3'</sup>), 4.13 (s, 2H, C<sup>5</sup>CH<sub>2</sub>OH), 3.77 (*app* q, *J* = 4.0 Hz, 1H, H<sup>4'</sup>), 3.61-3.49 (*m*, 2H, H<sup>5'</sup> and H<sup>5''</sup>), 2.18 – 1.95 (*m*, 2H, H<sup>2'</sup> and H<sup>2''</sup>).

**<sup>13</sup>C{<sup>1</sup>H}-NMR** (101 MHz, DMSO-*d*<sub>6</sub>, ppm) δ 162.6(C<sup>4</sup>), 150.3(C<sup>2</sup>), 136.7(C<sup>6</sup>), 114.2(C<sup>5</sup>), 87.3(C<sup>4'</sup>), 83.9(C<sup>1'</sup>), 70.5(C<sup>3'</sup>), 61.4(C<sup>5'</sup>), 56.0 (C<sup>5</sup>C). \*C<sup>2'</sup> peak hidden by DMSO peak confirmed through 2D NMR.

NMR values in agreement with literature<sup>12</sup>

**RP-HPLC** (Method A): *t*<sub>R</sub> = 2.48 min, 60% conversion (std =5).

**HRMS (ESI)** *m/z*: [M+Na]<sup>+</sup> calcd for C<sub>10</sub>H<sub>14</sub>N<sub>2</sub>O<sub>6</sub>Na 281.0774; found, 281.0738

### 2'-Deoxy-5-Azidomethyluridine (**15**)

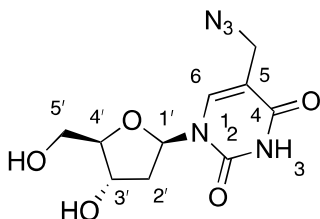

Prepared using the general enzymatic nucleoside transglycosylation procedure. A 50 mM nucleobase stock solution (10.5 mg dissolved in 1257  $\mu$ L) in mQ H<sub>2</sub>O (10.0  $\mu$ mol, 200  $\mu$ L, 1 equiv) was mixed with a 200 mM deoxycytidine solution (454 mg in 10 mL), which was dissolved in mQ H<sub>2</sub>O (100.0  $\mu$ mol, 500  $\mu$ L, 10 equiv). Next, 296  $\mu$ L 30 mM Na<sub>2</sub>HPO<sub>4</sub> pH 6 solution was added alongside 4  $\mu$ L of NDT stock solution to afford a final volume of 1 mL and the resulting reaction mixture was shaken at 950 rpm at rt for 24 h. The crude reaction mixture was purified by preparative HPLC (method D) affording 2'-deoxy-5-azidomethyluridine (**15**).

**<sup>1</sup>H NMR** (400 MHz, DMSO-*d*<sub>6</sub>, ppm)  $\delta$  11.55 (s, 1H, NH), 8.04 (s, 1H, *H*<sup>6</sup>), 6.15 (*app* t, *J* = 6.7 Hz, 1H, *H*<sup>1'</sup>), 5.25 (d, *J* = 4.2 Hz, 1H, OH<sup>3'</sup>), 5.03 (*app* t, *J* = 5.2 Hz, 1H, OH<sup>5'</sup>), 4.28-4.18 (m, 1H, *H*<sup>3'</sup>), 4.07 (d, *J* = 1.5 Hz, 2H, CH<sub>2</sub>), 3.79 (*app* q, *J* = 3.7 Hz, 1H, *H*<sup>4'</sup>), 3.61 (ddd, *J* = 11.8, 5.4, 4.0 Hz, 1H, *H*<sup>5'</sup> or *H*<sup>5''</sup>), 3.55 (ddd, *J* = 11.8, 5.2, 4.1 Hz, 1H, *H*<sup>5'</sup> or *H*<sup>5''</sup>), 2.14 – 2.08 (m, 2H, *H*<sup>2'</sup> and *H*<sup>2''</sup>).

**<sup>13</sup>C{<sup>1</sup>H}-NMR** (101 MHz, DMSO-*d*<sub>6</sub>, ppm)  $\delta$  162.8(C<sup>4</sup>), 150.2(C<sup>2</sup>), 139.8(C<sup>6</sup>), 108.2(C<sup>5</sup>), 87.4(C<sup>4'</sup>), 84.2(C<sup>1'</sup>), 70.2(C<sup>3'</sup>), 61.2(C<sup>5'</sup>), 46.9(C<sup>5</sup>CH<sub>2</sub>), 45.7(C<sup>2'</sup>).

NMR values in agreement with literature<sup>12</sup>

**RP-HPLC** (Method A): *t*<sub>R</sub> = 4.12 min, 60% conversion (std = 2).

**IR**  $\nu_{\text{max}}$  (cm<sup>-1</sup>): 2110 (N=N=N stretch), 1672 (C=O).

**HRMS (ESI)** *m/z*: [M+Na]<sup>+</sup> calcd for C<sub>10</sub>H<sub>13</sub>N<sub>5</sub>O<sub>5</sub>Na 306.0809; found, 306.0804.

### 2'-Deoxy-5-nitrouridine (**20**)

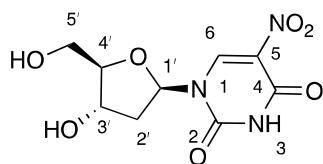

Prepared using the general enzymatic nucleoside transglycosylation procedure. A 50 mM nucleobase stock solution (6 mg dissolved in 769  $\mu$ L) in DMSO (10.0  $\mu$ mol, 200  $\mu$ L, 1 equiv) was mixed with a 100mM deoxycytidine solution (227 mg in 10 mL), which was dissolved in mQ H<sub>2</sub>O (80.0  $\mu$ mol, 792  $\mu$ L, 8 equiv). Next, 8  $\mu$ L of NDT stock solution was added to afford a final volume of 1 mL and the resulting reaction mixture was shaken at 950 rpm at 40 °C for 24

h. The crude reaction mixture was purified by preparative HPLC (method D) affording 2'-deoxy-5-nitrouridine (**20**) for characterisation.

**RP-HPLC** (Method A):  $t_R$  = 5.09 min, 51% conversion (std = 1).

Characterisation of the target nucleoside was confirmed through  $^1\text{H}$  NMR in comparison with the small-scale characterisation.

### 2'-Deoxy-5-trifluorouridine (**21**)

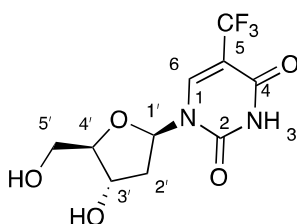

Prepared using the general enzymatic nucleoside transglycosylation procedure. A 50 mM nucleobase stock solution (17.4 mg dissolved in 1.9 mL) in DMSO (10.0  $\mu\text{mol}$ , 200  $\mu\text{L}$ , 1 equiv) was mixed with a 100 mM deoxycytidine solution (682 mg in 30 mL) dissolved in 100 mM  $\text{Na}_2\text{HPO}_4$  buffer solution (50.0  $\mu\text{mol}$ , 500  $\mu\text{L}$ , 5 equiv). Next, 298  $\mu\text{L}$  100 mM  $\text{Na}_2\text{HPO}_4$  buffer solution was added alongside 2  $\mu\text{L}$  of NDT stock solution to afford a final volume of 1 mL and the resulting reaction mixture was shaken at 950 rpm at 40  $^\circ\text{C}$  for 24 h. The crude reaction mixture was purified by preparative HPLC (method D) affording 2'-deoxy-5-trifluorouridine (**21**).

**$^1\text{H}$  NMR** (400 MHz,  $\text{DMSO}-d_6$ , ppm)  $\delta$  11.82 (br s, 1H,  $\text{NH}$ ), 8.67 (s, 1H,  $\text{H}^6$ ), 6.09 (*app* t,  $J$  = 6.1 Hz, 1H,  $\text{H}^{1'}$ ), 5.24 (br s, 1H,  $\text{OH}^{3'}$ ), 5.18 (br s, 1H,  $\text{OH}^{5'}$ ), 4.24 (*app* q,  $J$  = 5.0 Hz, 1H,  $\text{H}^{3'}$ ), 3.82 (*app* q,  $J$  = 3.2 Hz, 1H,  $\text{H}^{4'}$ ), 3.69 – 3.61 (m, 1H,  $\text{H}^{5'}$  or  $\text{H}^{5''}$ ), 3.61 – 3.54 (m, 1H,  $\text{H}^{5'}$  or  $\text{H}^{5''}$ ), 2.22 - 2.15 (m, 2H,  $\text{H}^{2'}$  and  $\text{H}^{2''}$ ).

**$^{13}\text{C}\{^1\text{H}\}$ -NMR** (101 MHz,  $\text{DMSO}-d_6$ , ppm)  $\delta$  159.5 ( $\text{C}^4$ ), 149.9 ( $\text{C}^2$ ), 142.0 ( $\text{C}^6$ ), 102.8, 102.5, 87.6( $\text{C}^{4'}$ ), 85.4( $\text{C}^{1'}$ ), 69.4( $\text{C}^{3'}$ ), 60.3( $\text{C}^{5'}$ ), 40.6( $\text{C}^{2'}$ ).  $\text{CF}_3$  carbon missing.

**$^{19}\text{F}$  NMR** (376 MHz, DMSO, ppm)  $\delta$  -61.5.

NMR values in agreement with literature<sup>13</sup>

**RP-HPLC** (Method A):  $t_R$  = 4.77 min, 71% conversion (std = 1).

**HRMS (ESI)  $m/z$ :**  $[M+Na]^+$  calcd for  $C_{10}H_{11}F_3N_2O_5Na$ , 292.0459; found, 292.0462.

**2'-Deoxy-5-carboxyuridine (22)**

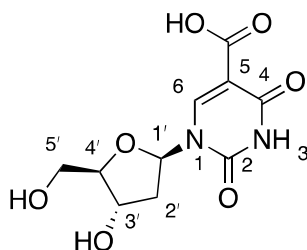

Prepared using the general enzymatic nucleoside transglycosylation procedure. A 50 mM nucleobase stock solution (22.3 mg dissolved in 2857  $\mu$ L) in DMSO (10.0  $\mu$ mol, 200  $\mu$ L, 1 equiv) was mixed with a 200 mM deoxycytidine solution (454 mg in 10 mL), which was dissolved in mQ  $H_2O$  (50.0  $\mu$ mol, 500  $\mu$ L, 10 equiv). Next, 296  $\mu$ L 100 mM  $Na_2HPO_4$  buffer solution was added alongside 4  $\mu$ L of NDT stock solution to afford a final volume of 1 mL and the resulting reaction mixture was shaken at 950 rpm at 40  $^{\circ}C$  for 24 h. The crude reaction mixture was purified by preparative HPLC (method D) affording 2'-deoxy-5-carboxyuridine (22).

**$^1H$  NMR** (400 MHz,  $DMSO-d_6$ , ppm)  $\delta$  12.84 (br s, 1H, COOH), 12.15 (br s, 1H, NH), 8.84 (s, 1H,  $H^6$ ), 6.09 (*app* t,  $J$  = 6.3 Hz, 1H,  $H^{1'}$ ), 5.27 (d,  $J$  = 4.3 Hz, 1H,  $OH^{3'}$ ), 5.08 (t,  $J$  = 4.6 Hz, 1H,  $OH^{5'}$ ), 4.23 (*app* dq,  $J$  = 5.9, 3.9 Hz, 1H,  $H^{3'}$ ), 3.87 (*app* q,  $J$  = 3.5 Hz, 1H,  $H^{4'}$ ), 3.62 (ddd,  $J$  = 11.7, 4.7, 3.6 Hz, 1H,  $H^{5'}$  or  $H^{5''}$ ), 3.56 (ddd,  $J$  = 11.7, 4.6, 3.6 Hz, 1H,  $H^{5'}$  or  $H^{5''}$ ), 2.28 – 2.12 (m, 2H,  $H^{2'}$  and  $H^{2''}$ ).

**$^{13}C\{^1H\}$ -NMR** (101 MHz,  $DMSO-d_6$ , ppm)  $\delta$  164.2(COOH), 163.3 ( $C^2$  or  $C^4$ ), 149.4 ( $C^2$  or  $C^4$ ), 148.0 ( $C^6$ ), 102.3( $C^5$ ), 88.0( $C^4$ ), 86.0( $C^{1'}$ ), 70.0( $C^{3'}$ ), 60.8( $C^{5'}$ ), 40.5( $C^{2'}$ ).

NMR values in agreement with literature<sup>14</sup>

**RP-HPLC** (Method A):  $t_R$  = 3.34 min, 26% conversion (std = 1).

**HRMS (ESI)  $m/z$ :**  $[M+Na]^+$  calcd for  $C_{10}H_{12}N_2O_7Na$ , 295.0537; found, 295.0527.

**3-((2*R*,4*S*,5*R*)-4-hydroxy-5-(hydroxymethyl)tetrahydrofuran-2-yl)pyrimidin-4(1*H*)-one (23).**<sup>15</sup>

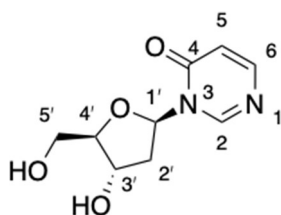

Prepared using the general enzymatic nucleoside transglycosylation procedure. A 50 mM nucleobase stock solution (28 mg dissolved in 5828  $\mu\text{L}$ ) in mQ  $\text{H}_2\text{O}$  (10.0  $\mu\text{mol}$ , 200  $\mu\text{L}$ , 1 equiv) was mixed with a 100 mM deoxycytidine solution (682 mg in 30 mL), which was dissolved in mQ  $\text{H}_2\text{O}$  (50.0  $\mu\text{mol}$ , 500  $\mu\text{L}$ , 5 equiv). Next, 298  $\mu\text{L}$  mQ  $\text{H}_2\text{O}$  solution was added alongside 2  $\mu\text{L}$  of NDT stock solution to afford a final volume of 1 mL and the resulting reaction mixture was shaken at 950 rpm at 40  $^\circ\text{C}$  for 24 h. The crude reaction mixture was purified by preparative HPLC (method D) affording 3-((2*R*,4*S*,5*R*)-4-hydroxy-5-(hydroxymethyl)tetrahydrofuran-2-yl)pyrimidin-4(1*H*)-one (**23**).

**$^1\text{H}$  NMR** (400 MHz,  $\text{DMSO}-d_6$ , ppm)  $\delta$  8.73 (s, 1H,  $H^2$ ), 7.93 (dd,  $J$  = 6.6, 0.6 Hz, 1H,  $H^6$ ), 6.37 (dd,  $J$  = 6.6, 1.0 Hz, 1H,  $H^5$ ), 6.25 (*app* t,  $J$  = 6.5 Hz, 1H  $H^{1'}$ ), 5.28 (d,  $J$  = 4.3 Hz, 1H,  $\text{OH}^{3'}$ ), 5.08 (*app* t,  $J$  = 5.1 Hz, 1H,  $\text{OH}^{5'}$ ), 4.27 (*app* dq,  $J$  = 5.9, 3.8 Hz, 1H,  $H^{3'}$ ), 3.88 (*app* q,  $J$  = 3.6 Hz, 1H,  $H^{4'}$ ), 3.65 (ddd,  $J$  = 11.9, 5.2, 3.6 Hz, 1H,  $H^{5'}$  or  $H^{5''}$ ), 3.58 (ddd,  $J$  = 11.9, 5.0, 3.8 Hz, 1H,  $H^{5'}$  or  $H^{5''}$ ), 2.38-2.27 (m, 1H,  $H^{2'}$  or  $H^{2''}$ ), 2.12 (ddd,  $J$  = 13.2, 6.8, 6.0 Hz, 1H,  $H^{2'}$  or  $H^{2''}$ ).

**$^{13}\text{C}\{^1\text{H}\}$ -NMR** (101 MHz,  $\text{DMSO}-d_6$ , ppm)  $\delta$  159.6 ( $\text{C}^4$ ), 153.2 ( $\text{C}^6$ ), 148.8 ( $\text{C}^2$ ), 114.4 ( $\text{C}^5$ ), 88.0 ( $\text{C}^4$ ), 84.7 ( $\text{C}^{1'}$ ), 70.0 ( $\text{C}^3$ ), 60.8 ( $\text{C}^5$ ), 41.1 ( $\text{C}^2$ ).

**RP-HPLC** (Method A):  $t_{\text{R}}$  = 2.80 min, 57% conversion (std = 1)

**HRMS (ESI)**  $m/z$ :  $[\text{M}+\text{Na}]^+$  calcd for  $\text{C}_9\text{H}_{12}\text{N}_2\text{O}_4\text{Na}$  235.0689; found, 235.0687.

## 2'-Deoxy-*N*-3-methyluridine (**24**)

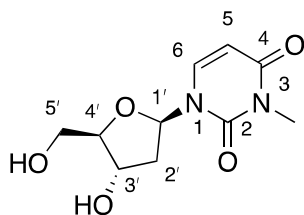

Prepared using the general enzymatic nucleoside transglycosylation procedure. A 50 mM nucleobase stock solution (16.0 mg dissolved in 2537.2261  $\mu\text{L}$ ) in DMSO (10.0  $\mu\text{mol}$ , 200  $\mu\text{L}$ , 1 equiv) was mixed with a 200mM deoxycytidine solution (454 mg in 10 mL), which was dissolved in mQ  $\text{H}_2\text{O}$  (50.0  $\mu\text{mol}$ , 500  $\mu\text{L}$ , 10 equiv). Next, 296  $\mu\text{L}$  100 mM  $\text{Na}_2\text{HPO}_4$  buffer solution was added alongside 4  $\mu\text{L}$  of NDT stock solution to afford a final volume of 1 mL and the resulting reaction mixture was shaken at 950 rpm at 40  $^\circ\text{C}$  for 24 h. The crude reaction mixture was purified by preparative HPLC (method D) affording 2'-deoxy-*N*-3-methyluridine (**24**).

**$^1\text{H}$  NMR** (400 MHz,  $\text{DMSO}-d_6$ , ppm)  $\delta$  7.92 (d,  $J$  = 8.1 Hz, 1H,  $H^5$  or  $H^6$ ), 6.19 (dd,  $J$  = 7.3, 6.1 Hz, 1H,  $H^{1'}$ ), 5.77 (d,  $J$  = 8.0 Hz, 1H,  $H^5$  or  $H^6$ ), 5.26 (d,  $J$  = 4.2 Hz, 1H,  $\text{OH}^{3'}$ ), 5.02 (t,  $J$  = 5.1 Hz, 1H,  $\text{OH}^{5'}$ ), 4.24 (*app* dq,  $J$  = 6.6, 3.3 Hz, 1H,  $H^{3'}$ ), 3.81 (*app* q,  $J$  = 3.6 Hz, 1H,  $H^{4'}$ ), 3.63 – 3.57 (m, 1H,  $H^{5'}$  or  $H^{5''}$ ), 3.54 (*app* dd,  $J$  = 8.0, 3.9 Hz, 1H,  $H^{5'}$  or  $H^{5''}$ ), 3.16 (s, 3H,  $\text{N}^3\text{CH}^3$ ), 2.20 – 2.04 (m, 2H,  $H^{2'}$  and  $H^{2''}$ ).

$^1\text{H}$  NMR in agreement with literature<sup>16</sup>

**$^{13}\text{C}\{^1\text{H}\}$ -NMR** (101 MHz,  $\text{DMSO}-d_6$ , ppm)  $\delta$  162.1( $\text{C}^2$  or  $\text{C}^4$ ), 150.6( $\text{C}^2$  or  $\text{C}^4$ ), 138.7( $\text{C}^6$  or  $\text{C}^5$ ), 100.7( $\text{C}^6$  or  $\text{C}^5$ ), 87.5( $\text{C}^{4'}$ ), 85.3( $\text{C}^{1'}$ ), 70.2( $\text{C}^{3'}$ ), 61.2( $\text{C}^{5'}$ ), 27.1( $\text{N}^3\text{CH}^3$ ).  $H^{2'}$  carbon is in the DMSO peak.

**RP-HPLC** (Method A):  $t_R$  = 4.04 min, 22% conversion (std = 1).

**HRMS (ESI)**  $m/z$ :  $[\text{M}+\text{Na}]^+$  calcd for  $\text{C}_{10}\text{H}_{14}\text{N}_2\text{O}_5\text{Na}$ , 265.0795; found, 265.0791.

### 2'-Deoxy-5-fluorocytidine (**25**)<sup>17</sup>

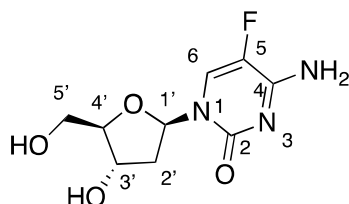

Prepared using the general enzymatic nucleoside transglycosylation procedure. A 50 mM nucleobase stock solution (16 mg dissolved in 2479  $\mu\text{L}$ ) in mQ  $\text{H}_2\text{O}$  (10.0  $\mu\text{mol}$ , 200  $\mu\text{L}$ , 1 equiv) was mixed with a 200mM thymidine solution (1454 mg in 30 mL), which was dissolved in mQ  $\text{H}_2\text{O}$  (50.0  $\mu\text{mol}$ , 500  $\mu\text{L}$ , 10 equiv). Next, 296  $\mu\text{L}$  mQ  $\text{H}_2\text{O}$  solution was added alongside

4  $\mu\text{L}$  of NDT stock solution to afford a final volume of 1 mL and the resulting reaction mixture was shaken at 950 rpm at 40 °C for 24 h. The crude reaction mixture was purified by preparative HPLC (method D) affording 2'-deoxy-5-fluorocytidine (**25**).

**$^1\text{H}$  NMR** (400 MHz,  $\text{DMSO}-d_6$ , ppm)  $\delta$  8.08 (d,  $J$  = 7.2 Hz, 1H,  $H^6$ ), 7.71 (s, 1H, NH), 7.48 (s, 1H, NH), 6.10 (ddd,  $J$  = 8.1, 6.1, 2.2 Hz, 1H,  $H^{1'}$ ), 5.18 (d,  $J$  = 4.2 Hz, 1H,  $\text{OH}^{3'}$ ), 5.07 (*app* t,  $J$  = 5.1 Hz, 1H,  $\text{OH}^{5'}$ ), 4.21 (*app* dq,  $J$  = 7.0, 3.7 Hz, 1H,  $H^{3'}$ ), 3.77 (*app* q,  $J$  = 3.4 Hz, 1H,  $H^{4'}$ ), 3.61 (ddd,  $J$  = 11.9, 5.1, 3.5 Hz, 1H,  $H^{5'}$  or  $H^{5''}$ ), 3.55 (ddd,  $J$  = 11.9, 5.0, 3.6 Hz, 1H,  $H^{5'}$  or  $H^{5''}$ ), 2.11 (ddd,  $J$  = 13.2, 6.0, 3.5 Hz, 1H,  $H^{2'}$  or  $H^{2''}$ ), 1.97 (ddd,  $J$  = 13.1, 7.2, 6.0 Hz, 1H,  $H^{2'}$  or  $H^{2''}$ ).

**$^{13}\text{C}\{^1\text{H}\}$ -NMR** (101 MHz,  $\text{DMSO}-d_6$ , ppm)  $\delta$  205.0, 180.6, 153.2, 125.3 (d,  $J$  = 31.9 Hz,  $\text{C}^6$ ), 87.3( $\text{C}^{4'}$ ), 85.1( $\text{C}^{1'}$ ), 70.1( $\text{C}^{3'}$ ), 61.0( $\text{C}^{5'}$ ), 40.4( $\text{C}^{2'}$ ).

**$^{19}\text{F}$  NMR** (376 MHz, DMSO)  $\delta$  -73.4.

**RP-HPLC** (Method A):  $t_R$  = 2.03 min, 62% conversion (std = 16).

**HRMS (ESI)**  $m/z$ :  $[\text{M}+\text{Na}]^+$  calcd for  $\text{C}_9\text{H}_{12}\text{FN}_3\text{O}_4\text{Na}$  268.0704; found, 268.0703.

### 2'-Deoxy-2-thiocytidine (**26**)

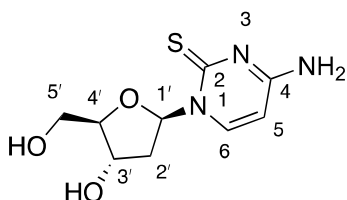

Prepared using the general enzymatic nucleoside transglycosylation procedure. A 50 mM nucleobase stock solution (10.7 mg dissolved in 1683  $\mu\text{L}$ ) in mQ  $\text{H}_2\text{O}$  (10.0  $\mu\text{mol}$ , 200  $\mu\text{L}$ , 1 equiv) was mixed with a 200mM deoxycytidine solution (454 mg in 10 mL), which was dissolved in mQ  $\text{H}_2\text{O}$  (100.0  $\mu\text{mol}$ , 500  $\mu\text{L}$ , 10 equiv). Next, 296  $\mu\text{L}$  mQ  $\text{H}_2\text{O}$  solution was added alongside 4  $\mu\text{L}$  of NDT stock solution to afford a final volume of 1 mL and the resulting reaction mixture was shaken at 950 rpm at 40 °C for 24 h. The crude reaction mixture was purified by preparative HPLC (method D) affording 2'-deoxy-2-thiocytidine (**26**).

**$^1\text{H}$  NMR** (400 MHz,  $\text{DMSO}-d_6$ , ppm)  $\delta$  8.09 (d,  $J$  = 7.5 Hz, 1H,  $H^5$ ), 7.65 (s, 1H, NH), 7.51 (s, 1H, NH), 6.95 (*app* t,  $J$  = 6.4 Hz, 1H,  $H^{1'}$ ), 6.07 (d,  $J$  = 7.5 Hz, 1H,  $H^6$ ), 5.21 (d,  $J$  = 4.1 Hz, 1H,  $\text{OH}^{3'}$ ), 5.05 (*app* t,  $J$  = 5.2 Hz, 1H,  $\text{OH}^{5'}$ ), 4.20 (*app* dq,  $J$  = 6.1, 3.7 Hz, 1H,  $H^{3'}$ ), 3.83 (*app* q,  $J$  = 3.6 Hz, 1H,  $H^{4'}$ ), 3.63 (ddd,  $J$  = 11.8, 5.2, 3.5 Hz, 1H,  $H^{5'}$  or  $H^{5''}$ ), 3.61 – 3.54 (m, 1H,  $H^{5'}$ ).

or  $H^{5''}$ ), 2.36 (ddd,  $J = 13.3, 6.0, 3.7$  Hz, 1H,  $H^{2'}$  or  $H^{2''}$ ), 1.88 (*app* dt,  $J = 13.1, 6.4$  Hz, 1H,  $H^{2'}$  or  $H^{2''}$ ).

**$^{13}\text{C}\{^1\text{H}\}$ -NMR** (101 MHz, DMSO- $d_6$ , ppm)  $\delta$  179.3( $\text{C}^4$  or  $\text{C}^2$ ), 160.3( $\text{C}^4$  or  $\text{C}^2$ ), 141.2( $\text{C}^5$ ), 97.8( $\text{C}^6$ ), 89.8( $\text{C}^{1'}$ ), 87.8( $\text{C}^{4'}$ ), 69.9 ( $\text{C}^3$ ), 60.9( $\text{C}^5$ ), 40.8 ( $\text{C}^{2'}$ ).

**RP-HPLC** (Method A):  $t_R = 3.61$  min, 52% conversion (std = 1).

**HRMS (ESI)**  $m/z$ :  $[\text{M}+\text{H}]^+$  calcd for  $\text{C}_9\text{H}_{14}\text{N}_3\text{O}_3\text{S}$  244.0750; found, 244.0750.

### 2'-Deoxy-4-hydroxyaminocytidine (**27**)<sup>18</sup>

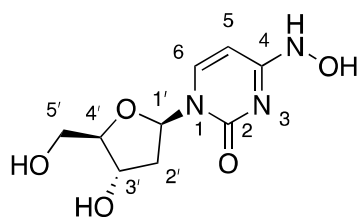

Prepared using the general enzymatic nucleoside transglycosylation procedure. A 50 mM nucleobase stock solution (10.1 mg dissolved in 1589  $\mu\text{L}$ ) in mQ  $\text{H}_2\text{O}$  (10.0  $\mu\text{mol}$ , 200  $\mu\text{L}$ , 1 equiv) was mixed with a 100mM thymidine solution (727 mg in 30 mL), which was dissolved in mQ  $\text{H}_2\text{O}$  (50.0  $\mu\text{mol}$ , 500  $\mu\text{L}$ , 10 equiv). Next, 296  $\mu\text{L}$  100 mM  $\text{Na}_2\text{HPO}_4$  buffer solution was added alongside 4  $\mu\text{L}$  of NDT stock solution to afford a final volume of 1 mL and the resulting reaction mixture was shaken at 950 rpm at 40  $^\circ\text{C}$  for 24 h. The crude reaction mixture was purified by preparative HPLC (method D) affording 2'-deoxy-4-hydroxyaminocytidine (**27**).

**$^1\text{H}$  NMR** (600 MHz, DMSO)  $\delta$  7.16 (d,  $J = 8.2$  Hz, 1H,  $H^6$ ), 6.14 (dd,  $J = 8.0, 6.1$  Hz, 1H,  $H^{1'}$ ), 5.61 (d,  $J = 8.2$  Hz, 1H,  $H^5$ ), 4.20 (*app* dt,  $J = 5.8, 2.9$  Hz, 1H,  $H^3$ ), 3.73 (*app* td,  $J = 3.9, 2.6$  Hz, 1H,  $H^{4'}$ ), 3.57 – 3.47 (m, 2H,  $H^{5'}$  and  $H^{5''}$ ), 2.10 – 1.94 (m, 2H,  $H^{2'}$  and  $H^{2''}$ ).

**$^{13}\text{C}$  NMR** (151 MHz, DMSO)  $\delta$  174.4, 149.4( $\text{C}^2$ ), 145.1( $\text{C}^4$ ), 131.7( $\text{C}^6$ ), 98.0( $\text{C}^5$ ), 87.4( $\text{C}^{4'}$ ), 83.9( $\text{C}^{1'}$ ), 71.1( $\text{C}^3$ ), 62.0( $\text{C}^5$ ), 39.2( $\text{C}^{2'}$ ).

**RP-HPLC** (Method A):  $t_R = 1.9$  min, 46% conversion (std = 4).

**HRMS (ESI)**  $m/z$ :  $[\text{M}+\text{Na}]^+$  calcd for  $\text{C}_9\text{H}_{13}\text{N}_3\text{O}_5\text{Na}$  266.07474; found, 266.0745.



### 2'-Deoxy-5-ethynyluridine (**3**)

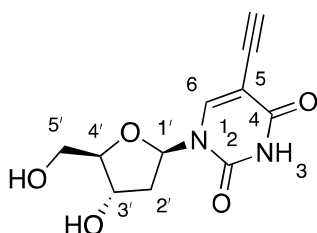

Prepared using the general enzymatic nucleoside transglycosylation procedure. A 50 mM nucleobase stock solution (10.7 mg dissolved in 1683  $\mu$ L) in EtOH (10.0  $\mu$ mol, 200  $\mu$ L, 1 equiv) was mixed with a 400mM deoxycytidine solution (908 mg in 10 mL), which was dissolved in mQ H<sub>2</sub>O (200.0  $\mu$ mol, 500  $\mu$ L, 20 equiv). Next, 296  $\mu$ L mQ H<sub>2</sub>O solution was added alongside 4  $\mu$ L of NDT stock solution to afford a final volume of 1 mL and the resulting reaction mixture was shaken at 950 rpm at 40 °C for 24 h. The crude reaction mixture was purified by preparative HPLC (method D) affording 2'-deoxy-5-ethynyluridine (**3**) for characterisation.

**RP-HPLC** (Method A):  $t_R$  = 3.60 min, 90 % conversion (std = 1).

Characterisation of the target nucleoside was confirmed through <sup>1</sup>H NMR in comparison with the large-scale characterisation.

### 2'-Deoxy-5-iodouridine (**14**)

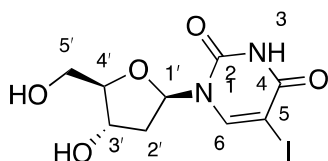

Prepared using the general enzymatic nucleoside transglycosylation procedure. A 50 mM nucleobase stock solution (21.2 mg dissolved in 1782  $\mu$ L) in EtOH (10.0  $\mu$ mol, 200  $\mu$ L, 1 equiv) was mixed with a 100mM deoxycytidine solution (682 mg in 30 mL), which was dissolved in mQ H<sub>2</sub>O (50.0  $\mu$ mol, 500  $\mu$ L, 5 equiv). Next, 298  $\mu$ L mQ H<sub>2</sub>O solution was added alongside 2  $\mu$ L of NDT stock solution to afford a final volume of 1 mL and the resulting reaction mixture was shaken at 950 rpm at 40 °C for 24 h. The crude reaction mixture was purified by preparative HPLC (method D) affording 2'-deoxy-5-iodouridine (**14**).

**<sup>1</sup>H NMR** (400 MHz, DMSO-*d*<sub>6</sub>, ppm)  $\delta$  11.65 (s, 1H, NH), 8.39 (s, 1H,  $H^6$ ), 6.09 (*app* t,  $J$  = 6.6 Hz, 1H,  $H^{1'}$ ), 5.23 (br s, 1H,  $OH^{3'}$ ), 5.13 (br s, 1H,  $OH^{5'}$ ), 4.24 (*app* q, 4.3 Hz 1H,  $H^{3'}$ ), 3.79 (*app*

q,  $J = 3.3$  Hz, 1H,  $H^{4'}$ ), 3.63 (*app* dd,  $J = 11.9, 3.3$  Hz, 1H,  $H^{5'}$  or  $H^{5''}$ ), 3.56 (*app* dd,  $J = 11.8, 3.3$  Hz, 1H,  $H^{5'}$  or  $H^{5''}$ ), 2.15 – 2.09 (m, 2H,  $H^{2'}$  and  $H^{2''}$ ).

$^{13}\text{C}\{^1\text{H}\}$ -NMR (101 MHz, DMSO- $d_6$ , ppm)  $\delta$  160.5( $C^4$  or  $C^5$ ), 150.1( $C^4$  or  $C^5$ ), 145.0( $C^6$ ), 87.5( $C^{4'}$ ), 84.6( $C^{1'}$ ), 70.0( $C^3$ ), 69.2( $C^2$ ), 60.8( $C^5$ ), 30.7( $C^{2'}$ ).

NMR in agreement with literature<sup>19</sup>

**RP-HPLC** (Method A):  $t_R = 4.10$  min, 88% conversion (std = 4).

**HRMS (ESI)**  $m/z$ :  $[M+Na]^+$  calcd for  $C_9H_{11}N_2O_5Na$  376.0905; found, 376.9599.

## 5.2 Purine SAR

### 2'-Deoxy-2-fluoro-6-chloropurine (32)

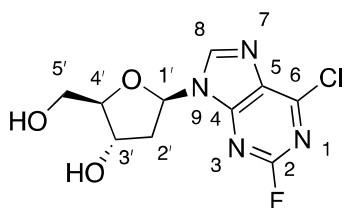

Prepared using the general enzymatic nucleoside transglycosylation procedure. A 50 mM nucleobase stock solution (32.2 mg dissolved in 3798  $\mu\text{L}$ ) in mQ  $\text{H}_2\text{O}$  (10.0  $\mu\text{mol}$ , 200  $\mu\text{L}$ , 1 equiv) was mixed with a 100mM deoxycytidine solution (682 mg in 30 mL), which was dissolved in mQ  $\text{H}_2\text{O}$  (50.0  $\mu\text{mol}$ , 500  $\mu\text{L}$ , 5 equiv). Next, 298  $\mu\text{L}$  mQ  $\text{H}_2\text{O}$  solution was added alongside 2  $\mu\text{L}$  of NDT stock solution to afford a final volume of 1 mL and the resulting reaction mixture was shaken at 950 rpm at 40  $^\circ\text{C}$  for 24 h. The crude reaction mixture was purified by preparative HPLC (method D) affording 2'-deoxy-2-fluoro-6-chloro-purine (32) for characterisation.

**RP-HPLC** (Method A):  $t_R = 6.33$  min, 89% conversion (std =1).

Characterisation of the target nucleoside was confirmed through  $^1\text{H}$  NMR in comparison with the large-scale characterisation.

### 2'-Deoxy-6-chloroguanosine (33)

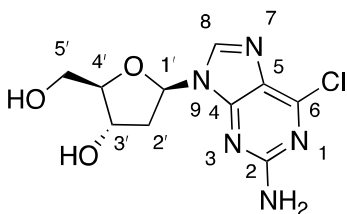

Prepared using the general enzymatic nucleoside transglycosylation procedure. A 50 mM nucleobase stock solution (32.2 mg dissolved in 3798  $\mu$ L) in mQ H<sub>2</sub>O (10.0  $\mu$ mol, 200  $\mu$ L, 1 equiv) was mixed with a 100mM deoxycytidine solution (682 mg in 30 mL), which was dissolved in mQ H<sub>2</sub>O (50.0  $\mu$ mol, 500  $\mu$ L, 5 equiv). Next, 298  $\mu$ L mQ H<sub>2</sub>O solution was added alongside 2  $\mu$ L of NDT stock solution to afford a final volume of 1 mL and the resulting reaction mixture was shaken at 950 rpm at 40 °C for 24 h. The crude reaction mixture was purified by preparative HPLC (method D) affording 2'-deoxy-6-chloroguanosine (**33**).

**<sup>1</sup>H NMR** (400 MHz, DMSO-*d*<sub>6</sub>, ppm)  $\delta$  8.34 (s, 1H, *H*<sup>8</sup>), 6.94 (s, 2H, NH), 6.22 (dd, *J* = 7.4, 6.1 Hz, 1H, *H*<sup>1'</sup>), 5.28 (d, *J* = 4.1 Hz, 1H OH<sup>3'</sup>), 4.92 (*app* t, *J* = 5.5 Hz, 1H, OH<sup>5'</sup>), 4.37 (*app* dq, *J* = 6.6, 3.4 Hz, 1H, *H*<sup>3'</sup>), 3.83 (*app* td, *J* = 4.6, 2.9 Hz, 1H, *H*<sup>4'</sup>), 3.58 (*app* dt, *J* = 11.8, 5.1 Hz, 1H, *H*<sup>5'</sup> or *H*<sup>5''</sup>), 3.51 (*app* dt, *J* = 11.7, 5.0 Hz, 1H, *H*<sup>5'</sup> or *H*<sup>5''</sup>), 2.61 (ddd, *J* = 13.2, 7.5, 5.8 Hz, 1H, *H*<sup>2'</sup> or *H*<sup>2''</sup>), 2.25 (ddd, *J* = 13.2, 6.2, 3.4 Hz, 1H, *H*<sup>2'</sup> or *H*<sup>2''</sup>).

**<sup>13</sup>C{<sup>1</sup>H}-NMR** (101 MHz, DMSO-*d*<sub>6</sub>, ppm)  $\delta$  159.7 (*C*<sup>6</sup>), 153.6 (*C*<sup>4</sup>), 149.4 (*C*<sup>2</sup>), 141.0 (*C*<sup>8</sup>), 123.5 (*C*<sup>5</sup>), 87.7 (*C*<sup>4'</sup>), 83.0 (*C*<sup>1'</sup>), 70.5 (*C*<sup>3'</sup>), 61.5 (*C*<sup>5'</sup>).

*C*<sup>2'</sup> peak hidden by DMSO peak confirmed through 2D NMR.

NMR values in agreement with literature<sup>20</sup>

**RP-HPLC** (Method A): *t*<sub>R</sub> = 5.30 min, 97% conversion (std = 1)

**HRMS (ESI)** *m/z*: [M+H]<sup>+</sup> calcd for C<sub>10</sub>H<sub>13</sub>ClN<sub>5</sub>O<sub>3</sub>. 286.0712 ; found, 286.0696.

### 2'-Deoxy-2-iodo-6-chloropurine (**34**)

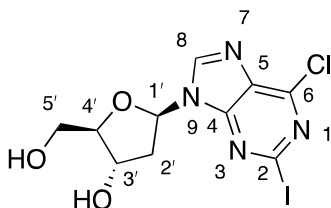

Prepared using the general enzymatic nucleoside transglycosylation procedure. A 50 mM nucleobase stock solution (17.9 mg dissolved in 1277  $\mu$ L) in EtOH (10.0  $\mu$ mol, 200  $\mu$ L, 1 equiv) was mixed with a 100mM deoxycytidine solution (682 mg in 30 mL), which was dissolved in mQ H<sub>2</sub>O (50.0  $\mu$ mol, 500  $\mu$ L, 5 equiv). Next, 298  $\mu$ L mQ H<sub>2</sub>O solution was added alongside 2  $\mu$ L of NDT stock solution to afford a final volume of 1 mL and the resulting reaction mixture was shaken at 950 rpm at 40 °C for 24 h. The crude reaction mixture was purified by preparative HPLC (method D) affording 2'-deoxy-2-iodo-6-chloropurine (**34**).

**<sup>1</sup>H NMR** (400 MHz, DMSO-*d*<sub>6</sub>, ppm)  $\delta$  8.87 (s, 1H, *H*<sup>8</sup>), 6.35 (*app* t, *J* = 6.4 Hz, 1H, *H*<sup>1'</sup>), 5.35 (d, *J* = 4.4 Hz, 1H, *OH*<sup>3'</sup>), 4.92 (*app* t, *J* = 5.5 Hz, 1H, *OH*<sup>5'</sup>), 4.42 (*app* dq, *J* = 6.1, 4.1 Hz, 1H, *H*<sup>3'</sup>), 3.88 (*app* q, *J* = 4.4 Hz, 1H, *H*<sup>4'</sup>), 3.61 (ddd, *J* = 11.8, 5.5, 4.5 Hz, 1H, *H*<sup>5'</sup> or *H*<sup>5''</sup>), 3.52 (ddd, *J* = 11.8, 5.5, 4.5 Hz, 1H, *H*<sup>5'</sup> or *H*<sup>5''</sup>), 2.70 (*app* dt, *J* = 13.6, 6.3 Hz, 1H, *H*<sup>2'</sup> or *H*<sup>2''</sup>), 2.43-2.29 (m, 1H, *H*<sup>2'</sup> or *H*<sup>2''</sup>).

**<sup>13</sup>C{<sup>1</sup>H}-NMR** (101 MHz, DMSO-*d*<sub>6</sub>, ppm)  $\delta$  150.8(*C*<sup>6</sup> or *C*<sup>2</sup>), 148.8(*C*<sup>5</sup> or *C*<sup>4</sup>), 145.6(*C*<sup>8</sup>), 138.3(*C*<sup>5</sup> or *C*<sup>4</sup>), 123.7(*C*<sup>6</sup> or *C*<sup>2</sup>), 88.1(*C*<sup>4'</sup>), 84.2(*C*<sup>1'</sup>), 70.2 (*C*<sup>3'</sup>), 61.1(*C*<sup>5'</sup>).

\**C*<sup>2'</sup> peak hidden by DMSO peak confirmed through 2D NMR.

**RP-HPLC** (Method A): *t*<sub>R</sub> = 6.80 min, 92% conversion (std = 1)

**HRMS** (ESI) *m/z*: [*M*+*H*]<sup>+</sup> calcd for C<sub>10</sub>H<sub>10</sub>ClN<sub>4</sub>O<sub>3</sub> 396.9559; found, 396.9555.

### 2'-Deoxy-4-acetamide-6chloropurine (**35**)

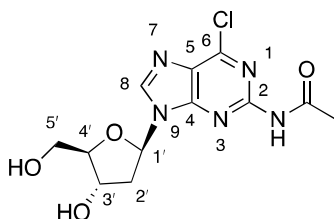

Prepared using the general enzymatic nucleoside transglycosylation procedure. A 50 mM nucleobase stock solution (19.4 mg dissolved in 1833  $\mu$ L) in EtOH (10.0  $\mu$ mol, 200  $\mu$ L, 1 equiv) was mixed with a 200 mM deoxycytidine solution (454 mg in 10 mL) dissolved in mQ H<sub>2</sub>O (100.0  $\mu$ mol, 500  $\mu$ L, 10 equiv). Next, 296  $\mu$ L mQ H<sub>2</sub>O was added alongside 4  $\mu$ L of NDT stock solution to afford a final volume of 1 mL and the resulting reaction mixture was shaken at 950 rpm at 40 °C for 24 h. The crude reaction mixture was purified by preparative HPLC (method D) affording 2'-deoxy-4-acetamide-6chloropurine (**35**).

**<sup>1</sup>H NMR** (400 MHz, DMSO-*d*<sub>6</sub>, ppm): δ 10.85 (s, 1H, *H*<sup>8</sup>), 8.70 (s, 1H, NH), 6.35 (*app* t, *J* = 6.7 Hz, 1H, *H*<sup>1'</sup>), 5.33 (br s, 1H, OH<sup>3'</sup>), 4.88 (br s, 1H, OH<sup>5'</sup>), 4.46 (*app* dt, *J* = 6.4, 3.4 Hz, 1H, *H*<sup>3'</sup>), 3.87 (*app* td, *J* = 4.7, 3.1 Hz, 1H, *H*<sup>4'</sup>), 3.61 (*app* dd, *J* = 11.8, 4.7 Hz, 1H, *H*<sup>5'</sup> or *H*<sup>5''</sup>), 3.54 (*app* dd, *J* = 11.8, 4.8 Hz, 1H *H*<sup>5'</sup> or *H*<sup>5''</sup>), 2.77 (*app* dt, *J* = 13.1, 6.5 Hz 1H *H*<sup>2'</sup> or *H*<sup>2''</sup>), 2.32 (ddd, *J* = 13.2, 6.4, 3.7 Hz, 1H, *H*<sup>2'</sup> or *H*<sup>2''</sup>), 2.18 (s, 3H, COCH<sup>3</sup>).

**<sup>13</sup>C{<sup>1</sup>H}-NMR** (101 MHz, DMSO-*d*<sub>6</sub>, ppm) δ 168.5 (CO), 152.3, 152.0, 149.0, 144.7, 127.6 (C<sup>2</sup>), 88.1(C<sup>4'</sup>), 83.8(C<sup>1'</sup>), 70.5(C<sup>3'</sup>), 61.5(C<sup>5'</sup>), 45.8, 24.5(COCH<sup>3</sup>).

\*C<sup>2'</sup> peak hidden by DMSO peak confirmed through 2D NMR.

**RP-HPLC** (Method A): *t*<sub>R</sub> = 5.34 min, 82.1% conversion (std = 3).

**HRMS** (ESI) *m/z*: [M+Na]<sup>+</sup> calcd for C<sub>12</sub>H<sub>14</sub>ClN<sub>5</sub>O<sub>4</sub>Na, 350.0627; found, 350.0630.

### 2'-Deoxy-6-thioguanosine (36)

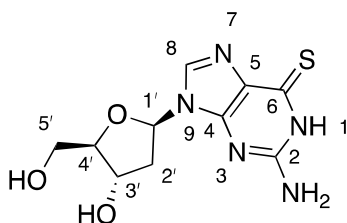

Prepared using the general enzymatic nucleoside transglycosylation procedure. A 50 mM nucleobase stock solution (7.5 mg dissolved in 897 μL) in mQ H<sub>2</sub>O (10.0 μmol, 200 μL, 1 equiv) was mixed with a 100mM deoxycytidine solution (682 mg in 30 mL), which was dissolved in mQ H<sub>2</sub>O (50.0 μmol, 500 μL, 5 equiv). Next, 298 μL mQ H<sub>2</sub>O solution was added alongside 2 μL of NDT stock solution to afford a final volume of 1 mL and the resulting reaction mixture was shaken at 950 rpm at 40 °C for 24 h. The crude reaction mixture was purified by preparative HPLC (method D) affording 2'-deoxy-6-thioguanosine (**36**) for characterisation.

**RP-HPLC** (Method A): *t*<sub>R</sub> = 3.7 min, 97% conversion (std = 1)

Characterisation of the target nucleoside was confirmed through <sup>1</sup>H NMR in comparison with the large-scale characterisation.

### 2'-Deoxy-6-O-methylguanosine (37)

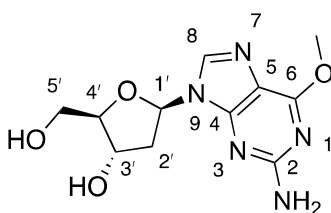

Prepared using the general enzymatic nucleoside transglycosylation procedure. A 50 mM nucleobase stock solution (10 mg dissolved in 1211  $\mu\text{L}$ ) in mQ  $\text{H}_2\text{O}$  (10.0  $\mu\text{mol}$ , 200  $\mu\text{L}$ , 1 equiv) was mixed with a 100mM deoxycytidine solution (682 mg in 30 mL), which was dissolved in mQ  $\text{H}_2\text{O}$  (50.0  $\mu\text{mol}$ , 500  $\mu\text{L}$ , 5 equiv). Next, 298  $\mu\text{L}$  mQ  $\text{H}_2\text{O}$  solution was added alongside 2  $\mu\text{L}$  of NDT stock solution to afford a final volume of 1 mL and the resulting reaction mixture was shaken at 950 rpm at 40  $^\circ\text{C}$  for 24 h. The crude reaction mixture was purified by preparative HPLC (method D) affording 2'-deoxy-6-O-methylguanosine (**37**).

**$^1\text{H}$  NMR** (400 MHz,  $\text{DMSO}-d_6$ , ppm)  $\delta$  8.08 (s, 1H,  $H^8$ ), 6.43 (s, 2H, NH), 6.21 (dd,  $J$  = 7.9, 6.0 Hz, 1H,  $H^{1'}$ ), 5.25 (br s, 1H,  $\text{OH}^{3'}$ ), 4.97 (br s, 1H,  $\text{OH}^{5'}$ ), 4.35 (*app* dd,  $J$  = 5.8, 2.9 Hz, 1H,  $H^{3'}$ ), 3.96 (s, 3H,  $\text{C}^6\text{OCH}_3$ ), 3.82 (*app* d,  $J$  = 2.8 Hz, 1H,  $H^{4'}$ ), 3.57 (*app* dd,  $J$  = 11.7, 4.7 Hz, 1H,  $H^{5'}$  or  $H^{5''}$ ), 3.50 (*app* dd,  $J$  = 11.7, 4.5 Hz, 1H,  $H^{5'}$  or  $H^{5''}$ ), 2.63 – 2.53 (m, 1H,  $H^{2'}$  or  $H^{2''}$ ), 2.21 (ddd,  $J$  = 13.1, 6.0, 3.0 Hz, 1H,  $H^{2'}$  or  $H^{2''}$ ).

**$^{13}\text{C}\{^1\text{H}\}$ -NMR** (101 MHz,  $\text{DMSO}-d_6$ , ppm)  $\delta$  160.6, 159.7, 153.7, 137.7, 113.9( $\text{C}^5$ ), 87.6( $\text{C}^{4'}$ ), 82.7( $\text{C}^{1'}$ ), 70.7( $\text{C}^{3'}$ ), 63.2( $\text{C}^{5'}$ ), 53.1( $\text{C}^6\text{OCH}_3$ ). \* $\text{C}^{2'}$  peak hidden by DMSO peak confirmed through 2D NMR.

NMR in agreement with literature<sup>21</sup>

**RP-HPLC** (Method A):  $t_R$  = 4.95 min, 98% conversion (std = 1)

**HRMS** (ESI)  $m/z$ :  $[\text{M}+\text{H}]^+$  calcd for  $\text{C}_{11}\text{H}_{16}\text{N}_5\text{O}_4$ . 282.1197; found, 282.1197.

### 2'-Deoxy-N2-Isobutyrylguanosine (**38**)

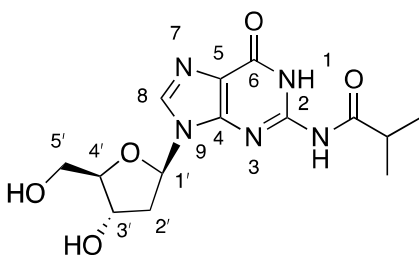

Prepared using the general enzymatic nucleoside transglycosylation procedure. A 50 mM nucleobase stock solution (17.5 mg dissolved in 1582  $\mu\text{L}$ ) in EtOH (10.0  $\mu\text{mol}$ , 200  $\mu\text{L}$ , 1 equiv) was mixed with a 200 mM deoxycytidine solution (454 mg in 10 mL) dissolved in mQ  $\text{H}_2\text{O}$  (100.0  $\mu\text{mol}$ , 500  $\mu\text{L}$ , 10 equiv). Next, 296  $\mu\text{L}$  mQ  $\text{H}_2\text{O}$  was added alongside 4  $\mu\text{L}$  of NDT stock solution to afford a final volume of 1 mL and the resulting reaction mixture was shaken at 950 rpm at 40  $^\circ\text{C}$  for 24 h. The crude reaction mixture was purified by preparative HPLC (method D) affording 2'-deoxy-N2-Isobutyrylguanosine (**38**).

**$^1\text{H}$  NMR** (400 MHz,  $\text{DMSO}-d_6$ , ppm):  $\delta$  12.17 (s, 1H, NH), 11.55 (s, 1H, NH), 8.49 (s, 1H,  $H^8$ ), 6.52 (*app* t,  $J$  = 6.5 Hz, 1H,  $H^{1'}$ ), 5.29 (d,  $J$  = 4.2 Hz, 1H,  $\text{OH}^{3'}$ ), 4.95 (*app* t,  $J$  = 5.4 Hz, 1H,  $\text{OH}^{5'}$ ), 4.32 (*app* dq,  $J$  = 7.2, 3.8 Hz, 1H,  $H^{3'}$ ), 3.86 (*app* q,  $J$  = 4.2 Hz, 1H,  $H^{4'}$ ), 3.61 (*app* dt,  $J$  = 11.8, 4.9 Hz, 1H, ,  $H^{5'}$  or  $H^{5''}$ ), 3.56 – 3.49 (*app* m, 1H, ,  $H^{5'}$  or  $H^{5''}$ ), 2.80 – 2.70 (m, 1H,  $\text{NHCOCH}$ ), 2.38 – 2.29 (m, 1H,  $H^{2'}$  or  $H^{2''}$ ), 1.12 (d,  $J$  = 6.8 Hz, 6H,  $\text{NHCOCHCH}_3\text{CH}_3$ ). The other  $H^{2'}$  or  $H^{2''}$  is in the DMSO peak.

$^1\text{H}$  NMR in agreement with literature<sup>22</sup>

**RP-HPLC** (Method A):  $t_R$  = 6.39 min, 47.1% conversion (std = 18).

**HRMS** (ESI)  $m/z$ :  $[\text{M}+\text{Na}]^+$  calcd for  $\text{C}_{14}\text{H}_{19}\text{N}_5\text{O}_5\text{Na}$  360.1278; found, 360.1281.

### 2'-Deoxy-2-fluoroadenosine (**39**)

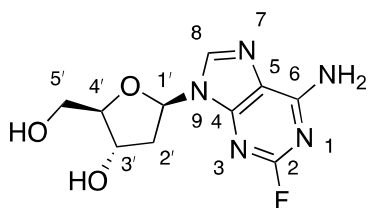

Prepared using the general enzymatic nucleoside transglycosylation procedure. A 50 mM nucleobase stock solution (13 mg dissolved in 1698  $\mu\text{L}$ ) in mQ  $\text{H}_2\text{O}$  (10.0  $\mu\text{mol}$ , 200  $\mu\text{L}$ , 1 equiv) was mixed with a 100mM thymidine solution (727 mg in 30 mL), which was dissolved in mQ  $\text{H}_2\text{O}$  (50.0  $\mu\text{mol}$ , 500  $\mu\text{L}$ , 5 equiv). Next, 298  $\mu\text{L}$  mQ  $\text{H}_2\text{O}$  solution was added alongside 2  $\mu\text{L}$  of NDT stock solution to afford a final volume of 1 mL and the resulting reaction mixture was shaken at 950 rpm at 40  $^\circ\text{C}$  for 24 h. The crude reaction mixture was purified by preparative HPLC (method D) affording 2'-deoxy-2-fluoroadenosine (**39**).

**<sup>1</sup>H NMR** (400 MHz, DMSO-*d*<sub>6</sub>, ppm) δ 8.31 (s, 1H, *H*<sup>8</sup>), 7.82 (s, 2H, *NH*), 6.23 (dd, *J* = 7.5, 6.2 Hz, 1H, *H*<sup>1'</sup>), 5.29 (d, *J* = 4.2 Hz, 1H, *OH*<sup>3'</sup>), 4.94 (*app* t, *J* = 5.6 Hz, 1H, *OH*<sup>5'</sup>), 4.38 (*app* dq, *J* = 6.4, 3.3 Hz, 1H, *H*<sup>3'</sup>), 3.85 (*app* td, *J* = 4.6, 2.8 Hz, 1H, *H*<sup>4'</sup>), 3.64 – 3.55 (m, 1H, *H*<sup>5'</sup> or *H*<sup>5''</sup>), 3.50 (ddd, *J* = 11.7, 5.9, 4.5 Hz, 1H, *H*<sup>5'</sup> or *H*<sup>5''</sup>), 2.65 (ddd, *J* = 13.4, 7.5, 5.8 Hz, 1H, *H*<sup>2'</sup> or *H*<sup>2''</sup>), 2.26 (ddd, *J* = 13.3, 6.2, 3.3 Hz, 1H, *H*<sup>2'</sup> or *H*<sup>2''</sup>).

**<sup>13</sup>C{<sup>1</sup>H}-NMR** (101 MHz, DMSO-*d*<sub>6</sub>, ppm) δ 159.5, 157.7 (d, <sup>3</sup>*J*<sub>C-F</sub> = 21.4 Hz, C<sup>4</sup> or C<sup>6</sup>), 150.2 (d, <sup>3</sup>*J*<sub>C-F</sub> = 20.0 Hz, C<sup>4</sup> or C<sup>6</sup>), 139.7(C<sup>8</sup>), 117.5(C<sup>5</sup>), 87.9(C<sup>4'</sup>), 83.5(C<sup>1'</sup>), 70.7(C<sup>3'</sup>), 61.6(C<sup>5'</sup>). C<sup>2'</sup> peak hidden by DMSO peak confirmed through 2D NMR. C2 missing from the carbon spectrum.

**<sup>19</sup>F NMR** (376 MHz, DMSO, ppm) δ –52.1.

**RP-HPLC** (Method A): *t*<sub>R</sub> = 4.68 min, 98% conversion (std = 1).

**HRMS** (ESI) *m/z*: [M+Na]<sup>+</sup> calcd for C<sub>10</sub>H<sub>12</sub>FN<sub>5</sub>O<sub>3</sub>Na 292.0816; found, 292.0807.

## 2'-Deoxy-2-aminoadenosine (**40**)

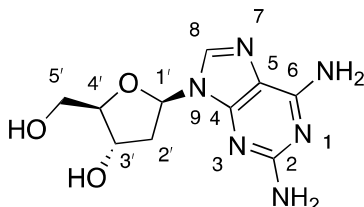

Prepared using the general enzymatic nucleoside transglycosylation procedure. A 50 mM nucleobase stock solution (5.4 mg dissolved in 719 μL) in mQ H<sub>2</sub>O (10.0 μmol, 200 μL, 1 equiv) was mixed with a 100mM deoxycytidine solution (682 mg in 30 mL), which was dissolved in mQ H<sub>2</sub>O (50.0 μmol, 500 μL, 5 equiv). Next, 298 μL mQ H<sub>2</sub>O solution was added alongside 2 μL of NDT stock solution to afford a final volume of 1 mL and the resulting reaction mixture was shaken at 950 rpm at 40 °C for 24 h. The crude reaction mixture was purified by preparative HPLC (method D) affording 2'-deoxy-2-aminoadenosine (**40**).

**<sup>1</sup>H NMR** (400 MHz, DMSO-*d*<sub>6</sub>, ppm) δ 7.91 (s, 1H, *H*<sup>8</sup>), 6.82 (s, 2H, *NH*), 6.16 (dd, *J* = 8.2, 5.9 Hz, 1H, *H*<sup>1'</sup>), 5.84 – 5.71 (m, 2H, *NH*), 5.22 (d, *J* = 3.9 Hz, 2H, *OH*<sup>3'</sup> and *OH*<sup>5'</sup>), 4.35 (*app* dq, *J* = 5.9, 2.8 Hz 1H, *H*<sup>3'</sup>), 3.83 (*app* td, *J* = 4.3, 2.3 Hz, 1H, *H*<sup>4'</sup>), 3.58 (*app* dd, *J* = 11.8, 4.4 Hz,



1H,  $H^{5'}$  or  $H^{5''}$ ), 3.50 (*app* dd,  $J = 11.8, 4.2$  Hz, 1H,  $H^{5'}$  or  $H^{5''}$ ), 2.59 (ddd,  $J = 13.5, 8.3, 5.6$  Hz, 1H,  $H^{2'}$  or  $H^{2''}$ ), 2.16 (ddd,  $J = 13.1, 5.9, 2.6$  Hz, 1H,  $H^{2'}$  or  $H^{2''}$ ).

**$^{13}\text{C}\{^1\text{H}\}$ -NMR** (101 MHz, DMSO- $d_6$ , ppm)  $\delta$  160.1, 156.2, 151.2( $\text{C}^5$ ), 135.9( $\text{C}^8$ ), 113.4( $\text{C}^6$ ), 87.7( $\text{C}^{4'}$ ), 83.1( $\text{C}^{1'}$ ), 71.0 ( $\text{C}^3$ ), 62.0( $\text{C}^5$ ).

$\text{C}^{2'}$  peak hidden by DMSO peak confirmed through 2D NMR.

NMR in agreement with literature<sup>23</sup>

**RP-HPLC** (Method A):  $t_R = 3.75$  min, 98% conversion (std = 1).

**HRMS** (ESI)  $m/z$ :  $[\text{M}+\text{H}]^+$  calcd for  $\text{C}_{10}\text{H}_{15}\text{N}_6\text{O}_3$ . 267.1200; found, 267.1210.

### 2'-Deoxy-6-methylpurine (41)

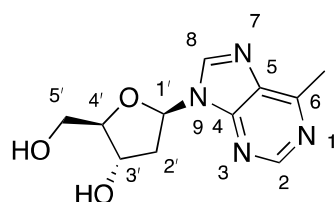

Prepared using the general enzymatic nucleoside transglycosylation procedure. A 50 mM nucleobase stock solution (10.5 mg dissolved in 1565.5  $\mu\text{L}$ ) in EtOH (10.0  $\mu\text{mol}$ , 200  $\mu\text{L}$ , 1 equiv) was mixed with a 100mM deoxycytidine solution (682 mg in 30 mL) dissolved in 100 mM  $\text{Na}_2\text{HPO}_4$  buffer solution (50.0  $\mu\text{mol}$ , 500  $\mu\text{L}$ , 5 equiv). Next, 298  $\mu\text{L}$  100 mM  $\text{Na}_2\text{HPO}_4$  buffer solution was added alongside 2  $\mu\text{L}$  of NDT stock solution to afford a final volume of 1 mL and the resulting reaction mixture was shaken at 950 rpm at 40  $^\circ\text{C}$  for 24 h. The crude reaction mixture was purified by preparative HPLC (method D) affording 2'-deoxy-6-methylpurine (41).

**$^1\text{H}$  NMR** (400 MHz, DMSO- $d_6$ , ppm)  $\delta$  8.78 (s, 1H,  $H^8$  or  $H^2$ ), 8.71 (s, 1H,  $H^8$  or  $H^2$ ), 6.45 (dd,  $J = 7.3, 6.3$  Hz, 1H,  $H^{1'}$ ), 5.33 (d,  $J = 4.2$  Hz, 1H,  $\text{OH}^{3'}$ ), 4.98 (*app* t,  $J = 5.6$  Hz, 1H,  $\text{OH}^{5'}$ ), 4.44 (*app* dq,  $J = 6.8, 3.5$  Hz, 1H,  $H^{3'}$ ), 3.89 (*app* td,  $J = 4.6, 2.9$  Hz, 1H,  $H^{4'}$ ), 3.62 (*app* dt,  $J = 11.8, 4.9$  Hz, 1H,  $H^{5'}$  or  $H^{5''}$ ), 3.52 (ddd,  $J = 11.7, 5.6, 4.5$  Hz, 1H,  $H^{5'}$  or  $H^{5''}$ ), 2.77 (ddd,  $J = 13.3, 7.3, 5.9$  Hz, 1H,  $H^{2'}$  or  $H^{2''}$ ), 2.72 (s, 3H,  $\text{C}^6\text{CH}_3$ ), 2.33 (ddd,  $J = 13.3, 6.3, 3.5$  Hz, 1H,  $H^{2'}$  or  $H^{2''}$ ).

**$^{13}\text{C}\{^1\text{H}\}$ -NMR** (101 MHz, DMSO- $d_6$ , ppm)  $\delta$  158.2 ( $\text{C}^6$  or  $\text{C}^5$ ), 151.6 ( $\text{C}^8$  or  $\text{C}^2$ ), 149.8 ( $\text{C}^4$ ), 143.9 ( $\text{C}^8$  or  $\text{C}^2$ ), 132.9 ( $\text{C}^6$  or  $\text{C}^5$ ), 88.0( $\text{C}^{4'}$ ), 83.7 ( $\text{C}^{1'}$ ), 70.7 ( $\text{C}^3$ ), 61.6 ( $\text{C}^5$ ) 19.1 ( $\text{C}^6\text{CH}_3$ ).

C<sup>2'</sup> peak hidden by DMSO peak confirmed through 2D NMR.

NMR in agreement with literature<sup>24</sup>

**RP-HPLC** (Method A):  $t_R$  = 3.60 min, 98% conversion (std = 1)

**HRMS** (ESI)  $m/z$ :  $[M+Na]^+$  calcd for C<sub>11</sub>H<sub>14</sub>N<sub>4</sub>O<sub>3</sub>Na, 273.0958; found, 273.0960.

### 2'-Deoxy-6-chloropurine (42)<sup>25</sup>

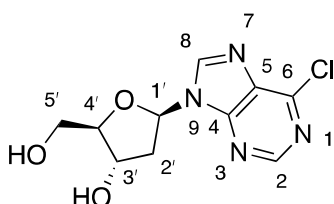

Prepared using the general enzymatic nucleoside transglycosylation procedure. A 50 mM nucleobase stock solution (22.3 mg dissolved in 2886  $\mu$ L) in EtOH (10.0  $\mu$ mol, 200  $\mu$ L, 1 equiv) was mixed with a 100mM thymidine solution (727 mg in 30 mL), which was dissolved in mQ H<sub>2</sub>O (50.0  $\mu$ mol, 500  $\mu$ L, 5 equiv). Next, 298  $\mu$ L mQ H<sub>2</sub>O solution was added alongside 2  $\mu$ L of NDT stock solution to afford a final volume of 1 mL and the resulting reaction mixture was shaken at 950 rpm at 40 °C for 24 h. The crude reaction mixture was purified by preparative HPLC (method D) affording 2'-deoxy-6-chloropurine (**42**).

**<sup>1</sup>H NMR** (400 MHz, DMSO-*d*<sub>6</sub>, ppm)  $\delta$  8.89 (s, 1H,  $H^8$ ), 8.80 (s, 1H,  $H^2$ ), 6.47 (*app* td,  $J$  = 6.6, 1.8 Hz, 1H,  $H^{1'}$ ), 5.45-5.31 (m, 1H,  $OH^{3'}$ ), 4.95 (br s, 1H,  $OH^{5'}$ ), 4.45 (*app* d,  $J$  = 5.3 Hz, 1H,  $H^{3'}$ ), 3.96 – 3.86 (m, 1H,  $H^{4'}$ ), 3.63 (*app* dd,  $J$  = 11.7, 4.4 Hz, 1H,  $H^{5'}$  or  $H^{5''}$ ), 3.54 (*app* dd,  $J$  = 11.9, 4.4 Hz 1H  $H^{5'}$  or  $H^{5''}$ ), 2.83 – 2.72 (m, 1H,  $H^{2'}$  or  $H^{2''}$ ), 2.38 (ddd,  $J$  = 13.4, 6.4, 3.9 Hz, 1H,  $H^{2'}$  or  $H^{2''}$ ).

**<sup>13</sup>C{<sup>1</sup>H}-NMR** (101 MHz, DMSO-*d*<sub>6</sub>, ppm)  $\delta$  151.6 ( $C^4$  or  $C^5$ ), 151.3 ( $C^2$ ), 149.2 ( $C^4$  or  $C^5$ ), 145.8 ( $C^8$ ), 131.4 ( $C^6$ ), 88.1 ( $C^{4'}$ ), 84.2 ( $C^{1'}$ ), 70.4 ( $C^{3'}$ ), 61.3 ( $C^{5'}$ ).

C<sup>2'</sup> peak hidden by DMSO peak confirmed through 2D NMR.

**RP-HPLC** (Method A):  $t_R$  = 5.40 min, 85% conversion (std = 1).

**HRMS** (ESI)  $m/z$ :  $[M+H]^+$  calcd for C<sub>10</sub>H<sub>12</sub>ClN<sub>4</sub>O<sub>3</sub> 271.0592; found, 271.0586.

### 2'-Deoxy-6-methyladenosine (43)

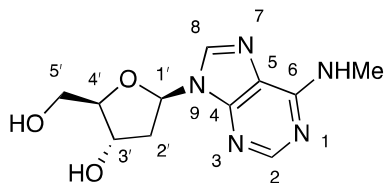

Prepared using the general enzymatic nucleoside transglycosylation procedure. A 50 mM nucleobase stock solution (12.8 mg dissolved in 1716  $\mu\text{L}$ ) in mQ  $\text{H}_2\text{O}$  (10.0  $\mu\text{mol}$ , 200  $\mu\text{L}$ , 1 equiv) was mixed with a 100mM deoxycytidine solution (682 mg in 30 mL), which was dissolved in mQ  $\text{H}_2\text{O}$  (50.0  $\mu\text{mol}$ , 500  $\mu\text{L}$ , 5 equiv). Next, 298  $\mu\text{L}$  mQ  $\text{H}_2\text{O}$  solution was added alongside 2  $\mu\text{L}$  of NDT stock solution to afford a final volume of 1 mL and the resulting reaction mixture was shaken at 950 rpm at 40  $^\circ\text{C}$  for 24 h. The crude reaction mixture was purified by preparative HPLC (method D) affording 2'-deoxy-6-methyladenosine (**43**).

**$^1\text{H}$  NMR** (400 MHz,  $\text{DMSO}-d_6$ , ppm)  $\delta$  8.31 (s, 1H,  $H^2$  or  $H^8$ ), 8.21 (s, 1H,  $H^2$  or  $H^8$ ), 7.76 (s, 1H, NH), 6.35 (dd,  $J = 7.9, 6.0$  Hz, 1H,  $H^{1'}$ ), 5.29 (d,  $J = 4.0$  Hz, 1H,  $\text{OH}^{3'}$ ), 5.22 (dd,  $J = 6.7, 4.9$  Hz, 1H,  $\text{OH}^{5'}$ ), 4.48 – 4.36 (m, 1H,  $H^{4'}$ ), 3.88 (app td,  $J = 4.3, 2.5$  Hz, 1H,  $H^{3'}$ ), 3.62 (app dt,  $J = 11.9, 4.6$  Hz, 1H,  $H^{5'}$  or  $H^{5''}$ ), 3.52 (ddd,  $J = 11.8, 6.7, 4.2$  Hz, 1H,  $H^{5'}$  or  $H^{5''}$ ), 2.95 (s, 3H,  $\text{C}^6\text{NHCH}_3$ ), 2.72 (ddd,  $J = 13.4, 8.0, 5.8$  Hz, 1H,  $H^{2'}$  or  $H^{2''}$ ), 2.25 (ddd,  $J = 13.2, 6.1, 2.9$  Hz, 1H,  $H^{2'}$  or  $H^{2''}$ ).

**$^{13}\text{C}\{^1\text{H}\}$ -NMR** (101 MHz,  $\text{DMSO}-d_6$ , ppm)  $\delta$  152.4( $\text{C}^2$  or  $\text{C}^8$ ), 139.2( $\text{C}^2$  or  $\text{C}^8$ ), 119.7, 88.0 ( $\text{C}^{4'}$ ), 83.9 ( $\text{C}^{1'}$ ), 71.0 ( $\text{C}^{3'}$ ), 61.9( $\text{C}^{5'}$ ).

$\text{C}^{2'}$  peak hidden by DMSO peak confirmed through 2D NMR.

**RP-HPLC** (Method A):  $t_R = 3.82$  min, 98% conversion (std = 1)

**HRMS** (ESI)  $m/z$ :  $[\text{M}+\text{H}]^+$  calcd for  $\text{C}_{11}\text{H}_{16}\text{N}_5\text{O}_3$  266.1248; found, 266.1249.

### 2'-Deoxy-N6-benzoyladenosine (44)

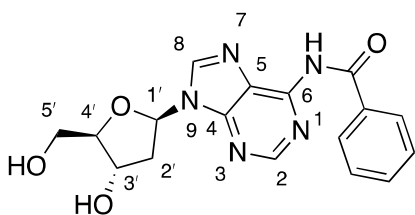

Prepared using the general enzymatic nucleoside transglycosylation procedure. A 50 mM nucleobase stock solution (10.5 mg dissolved in 823  $\mu\text{L}$ ) in mq  $\text{H}_2\text{O}$  (10.0  $\mu\text{mol}$ , 200  $\mu\text{L}$ , 1 equiv) was mixed with a 100mM thymidine solution (727 mg in 30 mL), which was dissolved in mQ  $\text{H}_2\text{O}$  (50.0  $\mu\text{mol}$ , 500  $\mu\text{L}$ , 5 equiv). Next, 298  $\mu\text{L}$  mQ  $\text{H}_2\text{O}$  solution was added alongside 2  $\mu\text{L}$  of NDT stock solution to afford a final volume of 1 mL and the resulting reaction mixture was shaken at 950 rpm at 40  $^\circ\text{C}$  for 24 h. The crude reaction mixture was purified by preparative HPLC (method D) affording 2'-deoxy-N6-benzoyladenine (**44**).

**$^1\text{H}$  NMR** (400 MHz,  $\text{DMSO}-d_6$ , ppm)  $\delta$  11.18 (s, 1H, NH), 8.76 (s, 1H,  $H^2$  or  $H^8$ ), 8.69 (s, 1H,  $H^2$  or  $H^8$ ), 8.09 – 8.00 (m, 2H,  $C^6bzH^{ortho}$ ), 7.70 – 7.61 (m, 1H,  $C^6bzH^{para}$ ), 7.61 – 7.52 (m, 2H,  $C^6bzH^{meta}$ ), 6.49 (dd,  $J = 7.3, 6.3$  Hz, 1H,  $H^{1'}$ ), 5.36 (d,  $J = 4.2$  Hz, 1H,  $OH^3$ ), 5.01 (*app t*,  $J = 5.6$  Hz, 1H,  $OH^{5'}$ ), 4.46 (*app dt*,  $J = 6.7, 3.3$  Hz, 1H,  $H^{3'}$ ), 3.91 (*app td*,  $J = 4.6, 2.9$  Hz, 1H,  $H^{4'}$ ), 3.65 (*app dt*,  $J = 11.7, 4.9$  Hz, 1H,  $H^{5'}$  or  $H^{5''}$ ), 3.55 (*app dt*,  $J = 11.8, 5.0, 5.0$  Hz, 1H,  $H^{5'}$  or  $H^{5''}$ ), 2.81 (ddd,  $J = 13.3, 7.4, 5.9$  Hz, 1H,  $H^{2'}$  or  $H^{2''}$ ), 2.37 (ddd,  $J = 13.2, 6.3, 3.4$  Hz, 1H  $H^{2'}$  or  $H^{2''}$ ).

**$^{13}\text{C}\{^1\text{H}\}$ -NMR** (101 MHz,  $\text{DMSO}-d_6$ , ppm)  $\delta$  150.3( $C^2$  or  $C^8$ ), 143.0( $C^2$  or  $C^8$ ), 132.4( $C^6bzC^{meta}$  or  $C^6bzC^{para}$ ) 128.4( $C^6bzC^{meta}$  or  $C^6bzC^{para}$  or  $C^6bzC^{ortho}$ ), 125.9( $C^6bzC^{meta}$  or  $C^6bzC^{para}$  or  $C^6bzC^{ortho}$ ), 88.0( $C^{4'}$ ), 83.7( $C^{1'}$ ), 70.7( $C^{3'}$ ), 61.6( $C^{5'}$ ).

$C^{2'}$  peak hidden by DMSO peak confirmed through 2D NMR.

NMR in agreement with literature<sup>26</sup>

**RP-HPLC** (Method A):  $t_R = 6.54$  min, 62% conversion (std = 1).

**HRMS** (ESI)  $m/z$ :  $[\text{M}+\text{H}]^+$  calcd for  $\text{C}_{17}\text{H}_{18}\text{N}_5\text{O}_4$  356.1353; found, 356.1363.

**2'-Deoxy-deaza-2-bromopurine (45)**

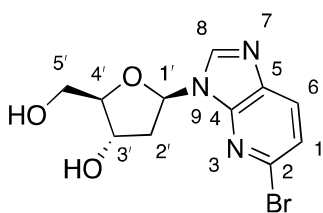

Prepared using the general enzymatic nucleoside transglycosylation procedure. A 50 mM nucleobase stock solution (23 mg dissolved in 2323  $\mu\text{L}$ ) in mQ  $\text{H}_2\text{O}$  (10.0  $\mu\text{mol}$ , 200  $\mu\text{L}$ , 1 equiv) was mixed with a 100mM thymidine solution (727 mg in 30 mL), which was dissolved in mQ  $\text{H}_2\text{O}$  (50.0  $\mu\text{mol}$ , 500  $\mu\text{L}$ , 5 equiv). Next, 298  $\mu\text{L}$  mQ  $\text{H}_2\text{O}$  solution was added alongside 2  $\mu\text{L}$  of NDT stock solution to afford a final volume of 1 mL and the resulting reaction mixture was shaken at 950 rpm at 40  $^\circ\text{C}$  for 24 h. The crude reaction mixture was purified by preparative HPLC (method D) affording 2'-deoxy-deaza-2-bromopurine (**45**).

**$^1\text{H}$  NMR** (400 MHz,  $\text{DMSO}-d_6$ , ppm)  $\delta$  8.71 (s, 1H,  $H^8$ ), 8.09 (d,  $J = 8.3$  Hz, 1H,  $H^1$  or  $H^6$ ), 7.51 (d,  $J = 8.4$  Hz, 1H,  $H^1$  or  $H^6$ ), 6.44 (dd,  $J = 7.4, 6.2$  Hz, 1H,  $H^{1'}$ ), 5.33 (d,  $J = 4.3$  Hz, 1H,  $\text{OH}^{3'}$ ), 4.90 (*app* t,  $J = 5.6$  Hz, 1H,  $\text{OH}^{5'}$ ), 4.51 – 4.31 (m, 1H,  $H^{3'}$ ), 3.88 (*app* td,  $J = 4.7, 2.9$  Hz, 1H,  $H^{4'}$ ), 3.61 (*app* dt,  $J = 11.7, 5.2$  Hz, 1H,  $H^{5'}$  or  $H^{5''}$ ), 3.52 (*app* dt,  $J = 11.7, 5.2$  Hz, 1H,  $H^{5'}$  or  $H^{5''}$ ), 2.73 (ddd,  $J = 13.3, 7.4, 5.9$  Hz, 1H,  $H^{2'}$  or  $H^{2''}$ ), 2.34 (ddd,  $J = 13.3, 6.3, 3.5$  Hz, 1H,  $H^{2'}$  or  $H^{2''}$ ).

**$^{13}\text{C}\{^1\text{H}\}$ -NMR** (101 MHz,  $\text{DMSO}-d_6$ , ppm)  $\delta$  144.2( $\text{C}^2$ ), 134.7( $\text{C}^5$ ), 134.6 ( $\text{C}^4$ ), 130.6( $\text{C}^1$  or  $\text{C}^6$ ), 122.1( $\text{C}^1$  or  $\text{C}^6$ ), 87.9( $\text{C}^{4'}$ ), 83.4 ( $\text{C}^{1'}$ ), 70.7( $\text{C}^3$ ), 61.6( $\text{C}^{5'}$ ).

$\text{C}^{2'}$  peak hidden by DMSO peak confirmed through 2D NMR.

**RP-HPLC** (Method A):  $t_R = 6.50$  min, 97% conversion (std = 1)

**HRMS** (ESI)  $m/z$ :  $[\text{M}+\text{H}]^+$  calcd for  $\text{C}_{11}\text{H}_{13}\text{BrN}_3\text{O}_3$ . 314.0135; found, 314.0135.

## 2'-Deoxy-deaza-2-methylpurine (**46**)

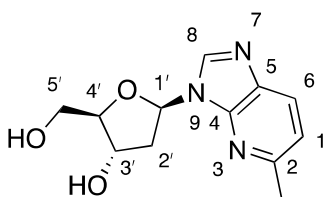

Prepared using the general enzymatic nucleoside transglycosylation procedure. A 50 mM nucleobase stock solution (11.4 mg dissolved in 1712  $\mu\text{L}$ ) in mQ  $\text{H}_2\text{O}$  (10.0  $\mu\text{mol}$ , 200  $\mu\text{L}$ , 1 equiv) was mixed with a 100mM thymidine solution (727 mg in 30 mL) dissolved in mQ  $\text{H}_2\text{O}$  (50.0  $\mu\text{mol}$ , 500  $\mu\text{L}$ , 5 equiv). Next, 298  $\mu\text{L}$  mQ  $\text{H}_2\text{O}$  solution was added alongside 2  $\mu\text{L}$  of NDT stock solution to afford a final volume of 1 mL and the resulting reaction mixture was shaken at 950 rpm at 40  $^\circ\text{C}$  for 24 h. The crude reaction mixture was purified by preparative HPLC (method D) affording 2'-deoxy-deaza-2-methylpurine (**46**).

**$^1\text{H}$  NMR** (400 MHz,  $\text{DMSO}-d_6$ , ppm)  $\delta$  8.56 (s, 1H,  $H^8$ ), 7.98 (d,  $J = 8.1$  Hz, 1H,  $H^1$  or  $H^6$ ), 7.18 (d,  $J = 8.1$  Hz, 1H,  $H^1$  or  $H^6$ ), 6.48 (dd,  $J = 8.1, 6.0$  Hz, 1H,  $H^{1'}$ ), 5.30 (d,  $J = 4.0$  Hz, 1H,  $\text{OH}^3$ ), 5.19 (dd,  $J = 6.7, 4.8$  Hz, 1H,  $\text{OH}^{5'}$ ), 4.43 (*app* dq,  $J = 5.9, 2.7$  Hz, 1H,  $H^{3'}$ ), 3.90 (*app* td,  $J = 4.3, 2.4$  Hz, 1H,  $H^{4'}$ ), 3.64 (*app* dt,  $J = 11.8, 4.6$  Hz, 1H,  $H^{5'}$  or  $H^{5''}$ ), 3.54 (ddd,  $J = 11.5, 6.7, 4.2$  Hz, 1H,  $H^{5'}$  or  $H^{5''}$ ), 2.76 (ddd,  $J = 13.5, 8.1, 5.7$  Hz, 1H,  $H^{2'}$  or  $H^{2''}$ ), 2.57 (s, 3H,  $\text{C}^2\text{CH}_3$ ), 2.28 (ddd,  $J = 13.1, 6.0, 2.8$  Hz, 1H,  $H^{2'}$  or  $H^{2''}$ ).

**$^{13}\text{C}\{^1\text{H}\}$ -NMR** (101 MHz,  $\text{DMSO}-d_6$ , ppm)  $\delta$  152.57 ( $\text{C}^2$ ), 145.76 ( $\text{C}^4$ ), 143.03 ( $\text{C}^8$ ), 133.54 ( $\text{C}^5$ ), 127.89 ( $\text{C}^1$  or  $\text{C}^6$ ), 118.27 ( $\text{C}^1$  or  $\text{C}^6$ ), 87.91 ( $\text{C}^{4'}$ ), 83.63 ( $\text{C}^{1'}$ ), 71.09 ( $\text{C}^{3'}$ ), 61.96 ( $\text{C}^{5'}$ ), 23.77 ( $\text{C}^2\text{CH}_3$ ).

$\text{C}^{2'}$  peak hidden by DMSO peak confirmed through 2D NMR.

**RP-HPLC** (Method A):  $t_R = 3.60$  min, 98% conversion (std = 1)

**HRMS** (ESI)  $m/z$ :  $[\text{M}+\text{H}]^+$  calcd for  $\text{C}_{12}\text{H}_{16}\text{N}_3\text{O}_3$  250.1186; found, 250.1178.

## 2'-Deoxy-deaza-2-trifluoropurine (**47**)

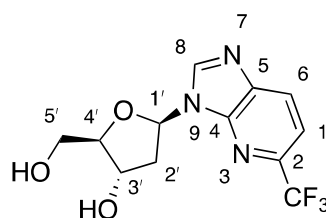

Prepared using the general enzymatic nucleoside transglycosylation procedure. A 50 mM nucleobase stock solution (11 mg dissolved in 1176  $\mu\text{L}$ ) in EtOH (10.0  $\mu\text{mol}$ , 200  $\mu\text{L}$ , 1 equiv) was mixed with a 100mM thymidine solution (727 mg in 30 mL), which was dissolved in mQ  $\text{H}_2\text{O}$  (50.0  $\mu\text{mol}$ , 500  $\mu\text{L}$ , 5 equiv). Next, 298  $\mu\text{L}$  mQ  $\text{H}_2\text{O}$  solution was added alongside 2  $\mu\text{L}$  of NDT stock solution to afford a final volume of 1 mL and the resulting reaction mixture was

shaken at 950 rpm at 40 °C for 24 h. The crude reaction mixture was purified by preparative HPLC (method D) affording 2'-deoxy-deaza-2-trifluoropurine (**47**).

**<sup>1</sup>H NMR** (400 MHz, DMSO-*d*<sub>6</sub>, ppm) δ 8.94 (s, 1H, *H*<sup>8</sup>), 8.38 (d, *J* = 8.2 Hz, 1H, *H*<sup>6</sup>), 7.81 (d, *J* = 8.3 Hz, 1H, *H*<sup>1</sup>), 6.53 (dd, *J* = 7.3, 6.3 Hz, 1H, *H*<sup>1</sup>'), 5.36 (d, *J* = 4.3 Hz, 1H, *OH*<sup>3</sup>'), 4.89 (*app* t, *J* = 5.6 Hz, 1H, *OH*<sup>5</sup>'), 4.46 (*app* dt, *J* = 6.3, 3.4 Hz, 1H, *H*<sup>3</sup>'), 3.89 (*app* td, *J* = 4.9, 2.9 Hz, 1H, *H*<sup>4</sup>'), 3.62 (*app* dt, *J* = 11.7, 5.2 Hz, 1H, *H*<sup>5</sup>' or *H*<sup>5''</sup>), 3.52 (*app* dt, *J* = 11.7, 5.1 Hz, 1H, *H*<sup>5</sup>' or *H*<sup>5''</sup>), 2.81 (ddd, *J* = 13.3, 7.4, 5.9 Hz, 1H, *H*<sup>2</sup>'), 2.37 (ddd, *J* = 13.3, 6.3, 3.5 Hz, 1H, *H*<sup>2''</sup>).

**<sup>13</sup>C{<sup>1</sup>H}-NMR** (101 MHz, DMSO-*d*<sub>6</sub>, ppm) δ 147.3(*C*<sup>4</sup>), 145.9 (*C*<sup>8</sup>), 140.3 (q, <sup>2</sup>*J*<sub>C-F</sub> = 34.2 Hz, *C*<sup>2</sup>) 137.8 (*C*<sup>5</sup>), 129.0(*C*<sup>6</sup>), 122.1 (q, <sup>1</sup>*J*<sub>C-F</sub> = 273.5 Hz, *CF*<sub>3</sub>) 115.2 (q, <sup>3</sup>*J*<sub>C-F</sub> = 3.4 Hz, *C*<sup>1</sup>), 88.0(*C*<sup>4</sup>'), 83.5(*C*<sup>1</sup>'), 70.7(*C*<sup>3</sup>'), 61.6(*C*<sup>5</sup>'). *C*<sup>2</sup>' peak hidden by DMSO peak confirmed through 2D NMR.

**<sup>19</sup>F NMR** (376 MHz, DMSO, ppm) δ -64.4.

**RP-HPLC** (Method A): *t*<sub>R</sub> = 7.00 min, 88% conversion (std = 2)

**HRMS** (ESI) *m/z*: [*M*+*Na*]<sup>+</sup> calcd for C<sub>12</sub>H<sub>12</sub>F<sub>3</sub>N<sub>3</sub>O<sub>3</sub>Na 326.0723; found, 326.0725.

## 2'-Deoxy-deaza-8-chloropurine (**48**)

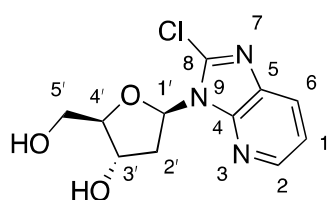

Prepared using the general enzymatic nucleoside transglycosylation procedure. A 50 mM nucleobase stock solution (11.8 mg dissolved in 1537 μL) in DMSO (10.0 μmol, 200 μL, 1 equiv) was mixed with a 200 mM deoxycytidine solution (454 mg in 10 mL) dissolved in mQ H<sub>2</sub>O (100.0 μmol, 500 μL, 10 equiv). Next, 296 μL 100 mM pH 6 Na<sub>2</sub>HPO<sub>4</sub> was added alongside 4 μL of NDT stock solution to afford a final volume of 1 mL and the resulting reaction mixture was shaken at 950 rpm at 40 °C for 24 h. The crude reaction mixture was purified by preparative HPLC (method D) affording 2'-deoxy-deaza-8-chloropurine (**48**).

**<sup>1</sup>H NMR** (400 MHz, DMSO-*d*<sub>6</sub>, ppm) δ 8.38 (dd, *J* = 4.9, 1.5 Hz, 1H, *H*<sup>2</sup>), 8.11 (dd, *J* = 8.1, 1.5 Hz, 1H *H*<sup>6</sup>), 7.39 (dd, *J* = 8.1, 4.9 Hz, 1H, *H*<sup>1</sup>), 6.46 (*app* t, *J* = 7.1 Hz, 1H, *H*<sup>1'</sup>), 5.36 (d, *J* = 4.4 Hz, 1H, *OH*<sup>3'</sup>), 5.00 (dd, *J* = 6.8, 5.1 Hz, 1H, *OH*<sup>5'</sup>), 4.54 (ddd, *J* = 7.6, 6.4, 3.4 Hz, 1H, *H*<sup>3'</sup>), 3.89 (*app* td, *J* = 5.3, 3.1 Hz, 1H, *H*<sup>4'</sup>), 3.66 (*app* dt, *J* = 11.7, 5.1 Hz, 1H, *H*<sup>5'</sup> or *H*<sup>5''</sup>), 3.48 (ddd, *J* = 11.9, 6.8, 5.5 Hz, 1H, *H*<sup>5'</sup> or *H*<sup>5''</sup>), 3.38 (ddd, *J* = 13.6, 7.7, 6.3 Hz, 1H, *H*<sup>2'</sup> or *H*<sup>2''</sup>), 2.27 (ddd, *J* = 13.3, 6.8, 3.3 Hz, 1H, *H*<sup>2'</sup> or *H*<sup>2''</sup>).

**<sup>13</sup>C{<sup>1</sup>H}-NMR** (101 MHz, DMSO-*d*<sub>6</sub>, ppm) δ 146.6(*C*<sup>5</sup>), 143.8(*C*<sup>2</sup>), 142.0(*C*<sup>4</sup> or *C*<sup>8</sup>), 134.1(*C*<sup>4</sup> or *C*<sup>8</sup>), 127.2(*C*<sup>6</sup>), 119.4(*C*<sup>1</sup>), 88.0(*H*<sup>4'</sup>), 84.9(*C*<sup>1'</sup>), 71.0(*H*<sup>3'</sup>), 61.9(*C*<sup>5'</sup>), 36.5(*C*<sup>2'</sup>).

**RP-HPLC** (Method A): *t*<sub>R</sub> = 6.59 min, 66% conversion (std = 0.2).

**HRMS** (ESI) *m/z*: [M+H]<sup>+</sup> calcd for C<sub>11</sub>H<sub>13</sub>ClN<sub>3</sub>O<sub>3</sub> 270.0640; found, 270.0628.

### 2'-Deoxy-deaza-8-trifluoropurine (49)

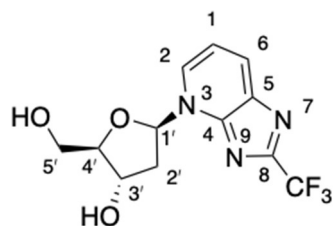

Prepared using the general enzymatic nucleoside transglycosylation procedure. A 50 mM nucleobase stock solution (15 mg dissolved in 1603 μL) in DMSO (10.0 μmol, 200 μL, 1 equiv) was mixed with a 200 mM deoxycytidine solution (454 mg in 10 mL) dissolved in mQ H<sub>2</sub>O (100.0 μmol, 500 μL, 10 equiv). Next, 296 μL mQ H<sub>2</sub>O was added alongside 4 μL of NDT stock solution to afford a final volume of 1 mL and the resulting reaction mixture was shaken at 950 rpm at 40 °C for 24 h. The crude reaction mixture was purified by preparative HPLC (method D) affording 2'-deoxy-deaza-8-trifluoropurine (49).

**<sup>1</sup>H NMR** (400 MHz, DMSO-*d*<sub>6</sub>, ppm) δ 8.90 (dd, *J* = 6.4, 1.1 Hz, 1H, *H*<sup>2</sup>), 8.62 (dd, *J* = 7.8, 1.0 Hz, 1H, *H*<sup>6</sup>), 7.54 (dd, *J* = 7.8, 6.4 Hz, 1H, *H*<sup>1</sup>), 6.91 (*app* t, *J* = 6.2 Hz, 1H, *H*<sup>1'</sup>), 5.44 (*app* s, 1H, *OH*<sup>3'</sup>), 5.25 (*app* s, 1H, *OH*<sup>5'</sup>), 4.44 – 4.28 (*app* m, 1H, *H*<sup>3'</sup>), 4.09 (*app* q, *J* = 3.7 Hz, 1H, *H*<sup>4'</sup>), 3.76 (*app* dd, *J* = 12.0, 3.6 Hz, 1H, *H*<sup>5'</sup> or *H*<sup>5''</sup>), 3.69 (*app* dd, *J* = 12.1, 4.0 Hz, 1H, *H*<sup>5'</sup> or *H*<sup>5''</sup>), 2.68 (ddd, *J* = 13.6, 6.4, 4.1 Hz, 1H, *H*<sup>2'</sup>), 2.43 (*app* dt, *J* = 13.6, 6.0 Hz, 1H, *H*<sup>2''</sup>).

**<sup>13</sup>C{<sup>1</sup>H}-NMR** (101 MHz, DMSO-*d*<sub>6</sub>, ppm) δ 149.3 (*C*<sup>4</sup> or *C*<sup>5</sup>), 142.0 (*C*<sup>4</sup> or *C*<sup>5</sup>), 133.8 (*C*<sup>6</sup>), 130.4 (*C*<sup>2</sup>), 122.1 (*CF*<sub>3</sub>), 114.9 (*C*<sup>1</sup>), 90.6 (*C*<sup>1'</sup>), 89.1(*C*<sup>4'</sup>), 69.8(*C*<sup>3'</sup>), 60.7(*C*<sup>5'</sup>), 41.7(*C*<sup>2'</sup>). *C*<sup>8</sup> not observed.



**$^{19}\text{F}$  NMR** (376 MHz, DMSO)  $\delta$  -63.6.

**RP-HPLC** (Method A):  $t_R$  = 5.87 min, 26% conversion.

**HRMS** (ESI)  $m/z$ :  $[\text{M}+\text{Na}]$  Calcd for  $\text{C}_{12}\text{H}_{12}\text{F}_3\text{N}_3\text{O}_3\text{Na}$  326.0723; found, 326.0720.

### 2'-Deoxy-triazolo-6-chloropurine (50)

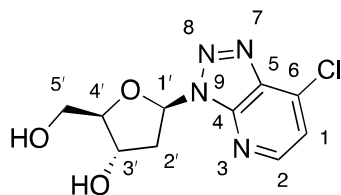

Prepared using the general enzymatic nucleoside transglycosylation procedure. A 50 mM nucleobase stock solution (17.2 mg dissolved in 2225.7  $\mu\text{L}$ ) in mQ  $\text{H}_2\text{O}$  (10.0  $\mu\text{mol}$ , 200  $\mu\text{L}$ , 1 equiv) was mixed with a 100mM thymidine solution (727 mg in 30 mL), which was dissolved in mQ  $\text{H}_2\text{O}$  (50.0  $\mu\text{mol}$ , 500  $\mu\text{L}$ , 5 equiv). Next, 298  $\mu\text{L}$  mQ  $\text{H}_2\text{O}$  solution was added alongside 2  $\mu\text{L}$  of NDT stock solution to afford a final volume of 1 mL and the resulting reaction mixture was shaken at 950 rpm at 40  $^\circ\text{C}$  for 24 h. The crude reaction mixture was purified by preparative HPLC (method D) affording 2'-deoxy-triazolo-6-chloropurine (**50**).

**$^1\text{H}$  NMR** (400 MHz,  $\text{DMSO}-d_6$ , ppm)  $\delta$  8.74 (d,  $J$  = 5.0 Hz, 1H,  $H^1$  or  $H^2$ ), 7.74 (d,  $J$  = 5.0 Hz, 1H,  $H^1$  or  $H^2$ ), 6.82 (dd,  $J$  = 7.0, 5.4 Hz, 1H,  $H^{1'}$ ), 5.42 (d,  $J$  = 4.6 Hz, 1H,  $\text{OH}^{3'}$ ), 4.72 (*app* t,  $J$  = 5.7 Hz, 1H,  $\text{OH}^{5'}$ ), 4.61 (*app* dq,  $J$  = 6.4, 4.7 Hz, 1H,  $H^{3'}$ ), 3.92 (*app* td,  $J$  = 5.7, 4.2 Hz, 1H,  $H^{4'}$ ), 3.56 (*app* dt,  $J$  = 11.0, 5.4 Hz, 1H,  $H^{5'}$  or  $H^{5''}$ ), 3.39 (*app* dt,  $J$  = 11.7, 5.9 Hz, 1H,  $H^{5'}$  or  $H^{5''}$ ), 3.13 (ddd,  $J$  = 13.6, 6.2, 5.4 Hz, 1H,  $H^{2'}$  or  $H^{2''}$ ). \*Other  $H^{2'}$  or  $H^{2''}$  is in the DMSO peak.

**$^{13}\text{C}\{^1\text{H}\}$ -NMR** (101 MHz,  $\text{DMSO}-d_6$ , ppm)  $\delta$  151.6( $\text{C}^1$  or  $\text{C}^2$ ), 146.2 ( $\text{C}^6$ ), 135.0( $\text{C}^4$  or  $\text{C}^5$ ), 134.8( $\text{C}^4$  or  $\text{C}^5$ ), 120.7( $\text{C}^1$  or  $\text{C}^2$ ), 88.4( $\text{C}^{4'}$ ), 85.7( $\text{C}^{1'}$ ), 70.6( $\text{C}^{3'}$ ), 61.8( $\text{C}^{5'}$ ), 38.1( $\text{C}^{2'}$ ).

**RP-HPLC** (Method A):  $t_R$  = 6.57 min, 12% conversion (std = 4).

**HRMS** (ESI)  $m/z$ :  $[\text{M}+\text{Na}]^+$  calcd for  $\text{C}_{10}\text{H}_{11}\text{ClN}_4\text{O}_3\text{Na}$  293.0412; found, 293.0410.

### 2'-Deoxy-deaza-6-bromopurine (51)

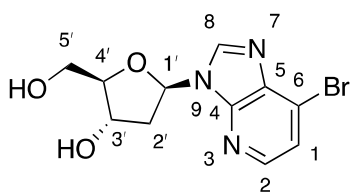

Prepared using the general enzymatic nucleoside transglycosylation procedure. A 50 mM nucleobase stock solution (14 mg dissolved in 1414  $\mu\text{L}$ ) in mQ  $\text{H}_2\text{O}$  (10.0  $\mu\text{mol}$ , 200  $\mu\text{L}$ , 1 equiv) was mixed with a 100mM thymidine solution (727 mg in 30 mL), which was dissolved in mQ  $\text{H}_2\text{O}$  (50.0  $\mu\text{mol}$ , 500  $\mu\text{L}$ , 5 equiv). Next, 298  $\mu\text{L}$  mQ  $\text{H}_2\text{O}$  solution was added alongside 2  $\mu\text{L}$  of NDT stock solution to afford a final volume of 1 mL and the resulting reaction mixture was shaken at 950 rpm at 40  $^\circ\text{C}$  for 24 h. The crude reaction mixture was purified by preparative HPLC (method D) affording 2'-deoxy-deaza-6-bromopurine (**51**) for characterisation.

**RP-HPLC** (Method B):  $t_{\text{R}}$  = 4.49 min, 90% conversion (std=4).

Characterisation of the target nucleoside was confirmed through  $^1\text{H}$  NMR in comparison with the large-scale characterisation.

### 5.3 Scale up of Purines

#### 2'-Deoxy-4-fluoro-6-chloropurine (**32**)

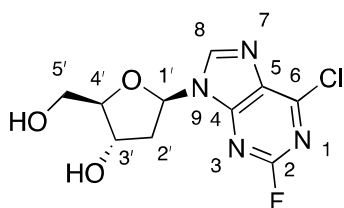

Deoxycytidine (658 mg, 2.9 mmol, 5 equiv) and 6-chloro-2-fluoro-9H-purine (100 mg, 0.6 mmol, 1 equiv) were dissolved in 59 mL of mQ  $\text{H}_2\text{O}$ . The solution was left stirring for an hour at 40  $^\circ\text{C}$  before 116  $\mu\text{L}$  of enzyme was added, while stirring for 24 h at 40  $^\circ\text{C}$ . The crude residue was reduced in vacuo, loaded onto silica and purified by flash column chromatography (silica gel, 0-30%  $\text{MeOH}/\text{CH}_2\text{Cl}_2$ ) to obtain 2'-deoxy-4-fluoro-6-chloropurine (**32**) in 54% yield (90 mg, 0.6 mmol) as a white solid.

**$^1\text{H}$  NMR** (400 MHz,  $\text{DMSO}-d_6$ , ppm)  $\delta$  8.88 (s, 1H,  $H^8$ ), 6.36 (t,  $J$  = 6.4 Hz, 1H,  $H^{1'}$ ), 5.36 (d,  $J$  = 4.4 Hz, 1H,  $\text{OH}^{3'}$ ), 4.93 (*app* t,  $J$  = 5.5 Hz, 1H,  $\text{OH}^{5'}$ ), 4.43 (*app* dq,  $J$  = 6.0, 4.0 Hz, 1H,  $H^{3'}$ ), 3.89 (*app* td,  $J$  = 4.4, 3.3 Hz, 1H,  $H^{4'}$ ), 3.62 (ddd,  $J$  = 11.9, 5.4, 4.5 Hz, 1H,  $H^{5'}$  or  $H^{5''}$ ), 3.53

(ddd,  $J = 11.8, 5.4, 4.5$  Hz, 1H,  $H^{5'}$  or  $H^{5''}$ ), 2.71 (*app* dt,  $J = 13.5, 6.3$  Hz, 1H,  $H^{2'}$  or  $H^{2''}$ ), 2.36 (ddd,  $J = 13.4, 6.4, 4.2$  Hz, 1H,  $H^{2'}$  or  $H^{2''}$ ).

**$^{13}\text{C}\{^1\text{H}\}$ -NMR** (101 MHz, DMSO- $d_6$ , ppm)  $\delta$  156.3 (d,  $^1J_{\text{C-F}} = 214.0$  Hz,  $\text{C}^2$ ), 153.4 (d,  $^3J_{\text{C-F}} = 17.5$  Hz  $\text{C}^4$ ), 150.6 (d,  $^3J_{\text{C-F}} = 18.1$  Hz  $\text{C}^6$ ), 146.7 (d,  $^5J_{\text{C-F}} = 3.3$  Hz  $\text{C}^8$ ), 130.7 (d,  $^4J_{\text{C-F}} = 4.6$  Hz  $\text{C}^5$ ), 88.1( $\text{C}^4$ ), 84.3( $\text{C}^1$ ), 70.1( $\text{C}^3$ ), 61.1( $\text{C}^5$ ).  $\text{C}^{2'}$  peak hidden by DMSO peak confirmed through 2D NMR.

**$^{19}\text{F}$  NMR** (376 MHz, DMSO, ppm)  $\delta$  -51.7.

NMR in agreement with literature<sup>27</sup>

**RP-HPLC** (Method A):  $t_{\text{R}} = 6.33$  min, 90% conversion.

**HRMS** (ESI)  $m/z$ :  $[\text{M}+\text{H}]^+$  calcd for  $\text{C}_{10}\text{H}_{11}\text{ClFN}_4\text{O}_3$ . 289.0498; found, 289.0495.

### 2'-Deoxy-6-thioguanosine (**36**)

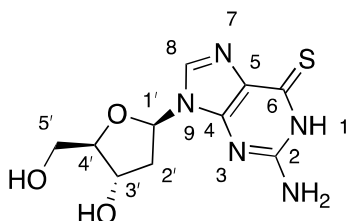

Deoxycytidine (1.14 g, 5 mmol, 5 equiv) and 6 thioguanine (167.2 mg, 1 mmol, 1 equiv) were dissolved in 100 mL of mQ  $\text{H}_2\text{O}$  to give a final concentration of 50 mM and 10 mM respectively. The solution was left stirring for an hour at 40 °C before 200  $\mu\text{L}$  of enzyme were added while stirring for 24 h and heating at 40 °C. The crude residue was allowed to cool to rt, with yellow crystals precipitating out in the solution, crystals were then dried, obtaining 2'-deoxy-6-thioguanosine (**36**) in 57% yield (163 mg, 1 mmol) as a yellow solid.

**$^1\text{H}$  NMR** (400 MHz, DMSO- $d_6$ , ppm)  $\delta$  11.92 (s, 1H,  $\text{NH}$ ), 8.10 (s, 1H,  $H^8$ ), 6.79 (s, 2H,  $\text{NH}$ ), 6.11 (dd,  $J = 7.6, 6.1$  Hz, 1H,  $H^1$ ), 5.26 (d,  $J = 4.0$  Hz, 1H,  $\text{OH}^3$ ), 4.92 (*app* t,  $J = 5.4$  Hz, 1H,  $\text{OH}^5$ ), 4.34 (*app* dq,  $J = 6.4, 3.2$  Hz, 1H,  $H^{3'}$ ), 3.81 (*app* td,  $J = 4.5, 2.7$  Hz, 1H,  $H^{4'}$ ), 3.56 (*app* dt,  $J = 11.6, 5.1$  Hz, 1H,  $H^{5'}$  or  $H^{5''}$ ), 3.50 (*app* dt,  $J = 11.7, 5.0$  Hz, 1H,  $H^{5'}$  or  $H^{5''}$ ), 2.21 (ddd,  $J = 13.1, 6.1, 3.3$  Hz, 1H,  $H^{2'}$  or  $H^{2''}$ ). The other 2  $H^{2''}$  is under the solvent peak.

**$^{13}\text{C}\{^1\text{H}\}$ -NMR** (101 MHz, DMSO- $d_6$ , ppm)  $\delta$  175.0 ( $\text{C}^6$ ), 153.0 ( $\text{C}^2$ ), 147.4( $\text{C}^4$ ), 138.2( $\text{C}^8$ ), 128.4( $\text{C}^5$ ), 87.6( $\text{C}^{4'}$ ), 82.7( $\text{C}^{1'}$ ), 70.6( $\text{C}^{3'}$ ), 61.5( $\text{C}^5$ ).

$\text{C}^{2'}$  peak hidden by DMSO peak confirmed through 2D NMR.

NMR in agreement with literature<sup>28</sup>

**RP-HPLC** (Method A):  $t_{\text{R}}$  = 3.7 min, 97% conversion.

**HRMS** (ESI)  $m/z$ :  $[\text{M}+\text{Na}]^+$  calcd for  $\text{C}_{10}\text{H}_{13}\text{N}_5\text{O}_3\text{SNa}$  306.0631; found, 306.0645.

### 2'-Deoxy-6-chloropurine (42)

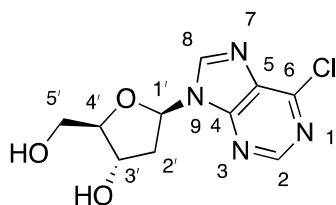

Prepared using the general scale-up enzymatic nucleoside transglycosylation procedure. Deoxycytidine (7.35 g, 32.4 mmol, 5 equiv) and 6-chloropurine (1.00 g, 6.47 mmol, 1 equiv) were transferred to a flask with 300 mL mQ  $\text{H}_2\text{O}$  and 600  $\mu\text{L}$  NDT. The mixture was stirred at 40  $^\circ\text{C}$  for 24 h. The crude reaction mixture was freeze dried and purified by column chromatography (silica gel, 0-20%  $\text{MeOH}/\text{CH}_2\text{Cl}_2$ ) obtain 2'-deoxy-6-chloropurine (**42**) with a 78% yield (1.37 g, 6.47 mmol) as a white solid.

Characterisation of the target nucleoside was confirmed through  $^1\text{H}$  NMR in comparison with the small-scale characterisation.

### 2'-Deoxy-deaza-2-bromopurine (45)

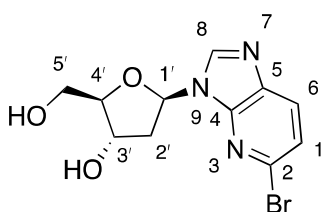

Deoxycytidine (551 mg, 2.42 mmol, 3 equiv) and 5-bromo-3*H*-imidazo[4,5-*b*]pyridine (160 mg, 808  $\mu\text{mol}$ , 1 equiv) were dissolved in 80 mL of mQ  $\text{H}_2\text{O}$ . Solution was left stirring for an hour

at 40 °C before 160  $\mu$ L of enzyme were added while stirring for 24 h and heating to 40 °C. The crude residue was reduced *in vacuo*, loaded onto silica and purified by flash column chromatography (silica gel, 0-30% MeOH/CH<sub>2</sub>Cl<sub>2</sub>) to obtain 2'-deoxy-deaza-2-bromopurine (**45**) with an 82% yield (208 mg, 808  $\mu$ mol) as a white solid.

Characterisation of the target nucleoside was confirmed through <sup>1</sup>H NMR in comparison with the small-scale characterisation.

### 2'-Deoxy-deaza-6-bromopurine (**51**)

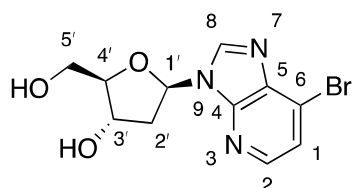

Deoxycytidine (551 mg, 2.42 mmol, 3 equiv) and 7-bromo-3H-imidazo[4,5-b]pyridine (160 mg, 808  $\mu$ mol, 1 equiv) were dissolved in 80 mL of mQ H<sub>2</sub>O. Solution was left stirring for an hour at 40 °C before 160  $\mu$ L of enzyme were added while stirring for 24 h and heating to 40 °C. The crude residue was reduced *in vacuo*, loaded onto silica and purified by flash column chromatography (silica gel, 0-30% MeOH/CH<sub>2</sub>Cl<sub>2</sub>) to obtain 2'-deoxy-deaza-6-bromopurine (**51**) with a 93% yield (236 mg, 808  $\mu$ mol) as an orange solid.

**<sup>1</sup>H NMR** (400 MHz, MeOD)  $\delta$  8.73 (s, 1H,  $H^8$ ), 8.23 (d,  $J$  = 5.3 Hz, 1H,  $H^2$ ), 7.60 (d,  $J$  = 5.3 Hz, 1H,  $H^1$ ), 6.59 (dd,  $J$  = 7.5, 6.1 Hz, 1H,  $H^{1'}$ ), 4.63 (*app* dt,  $J$  = 6.0, 3.0 Hz, 1H,  $H^3$ ), 4.11 (*app* q,  $J$  = 3.3 Hz, 1H,  $H^{4'}$ ), 3.88 (*app* dd,  $J$  = 12.2, 3.3 Hz, 1H,  $H^{5'}$ ) 3.78 (*app* dd  $J$  = 12.2, 3.7 Hz, 1H,  $H^{5''}$ ), 2.88 (ddd,  $J$  = 13.5, 7.5, 6.0 Hz, 1H,  $H^2$ ), 2.50 (ddd,  $J$  = 13.5, 6.2, 3.2 Hz, 1H,  $H^{2''}$ ).

**<sup>13</sup>C{<sup>1</sup>H}-NMR** (101 MHz, MeOD)  $\delta$  147.1 ( $C^4$ ), 145.7 ( $C^2$ ), 145.6 ( $C^8$ ), 136.5 ( $C^5$ ), 125.0 ( $C^6$ ), 123.6 ( $C^1$ ), 89.7 ( $C^{4'}$ ), 87.1 ( $C^{1'}$ ), 72.8 ( $C^{3'}$ ), 63.4 ( $C^{5'}$ ), 41.4 ( $C^{2'}$ ).

**RP-HPLC** (Method B):  $t_R$  = 4.49 min, 89% conversion.

**HRMS** (ESI)  $m/z$ :  $[M+Na]^+$  calculated for C<sub>11</sub>H<sub>12</sub>BrN<sub>3</sub>O<sub>3</sub>Na, 335.9954; found 335.9952.

### 2'-Deoxy-6-chloroguanosine (**33**)

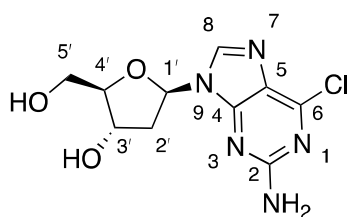

Deoxycytidine (322 mg, 1.40 mmol, 3 equiv) and 6-chloro-9*H*-purin-2-amine (80 mg, 0.47 mmol, 1 equiv) were dissolved in 40 mL of mQ H<sub>2</sub>O. The solution was left stirring for an hour at 40 °C before 200 µL of enzyme was added, while stirring for 24 h at RT. The crude residue was reduced in vacuo, loaded onto silica and purified by flash column chromatography (silica gel, 0-30% MeOH/CH<sub>2</sub>Cl<sub>2</sub>) to obtain 2'-deoxy-6-chloroguanosine (**33**) in 88% yield (118 mg, 0.47 mmol) as a white solid.

Characterisation of the target nucleoside was confirmed through <sup>1</sup>H NMR in comparison with the small-scale characterisation.

#### 5.4 <sup>15</sup>N Labelling

##### 3',5'-tri-O-acetyl-deaza-6-bromopurine (**57**)

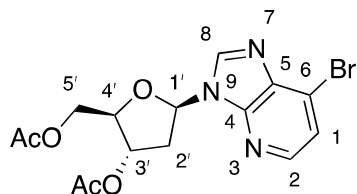

An oven-dried vial under an argon atmosphere was charged with nucleoside **51** (100 mg, 318 µmol) and 4-Dimethylaminopyridine (4 mg, 33 µmol, 0.1 equiv). The vial was capped with a rubber septum, and a solution of acetic anhydride (300 µL, 3.2 mmol, 10 equiv) and pyridine (3 mL) were added and stirred at rt for 18 h. The crude mixture was diluted with ice cold water (10 mL) and extracted three times with ethyl acetate (10 mL x 3). The combined organic layers were washed once with NaHCO<sub>3</sub> (10 mL) and twice with brine (10 mL). The organic layer was dried (Na<sub>2</sub>SO<sub>4</sub>), filtered and concentrated *in vacuo*, to obtain 2',5'-tri-O-acetyl-deaza-6-bromopurine (**57**) in (114 mg, 90% yield) as an orange oil.

**<sup>1</sup>H NMR** (500 MHz, DMSO-*d*<sub>6</sub>, ppm) δ 8.80 (s, 1H, *H*<sup>8</sup>), 8.28 (d, *J* = 5.2 Hz, 1H, *H*<sup>2</sup>), 7.67 (d, *J* = 5.2 Hz, 1H, *H*<sup>1</sup>), 6.53 (*app* t, *J* = 7.0 Hz, 1H, *H*<sup>1'</sup>), 5.48 – 5.42 (m, 1H, *H*<sup>3</sup>), 4.37 – 4.27 (m, 2H, *H*<sup>5'</sup> or *H*<sup>5''</sup> and *H*<sup>4'</sup>), 4.23 (*app* dd, *J* = 11.0, 5.4 Hz, 1H *H*<sup>5'</sup> or *H*<sup>5''</sup>), 3.22 (*app* dt, *J* = 14.3, 7.2

Hz, 1H,  $H^{2'}$  or  $H^{2''}$ ), 2.12 (s, 3H,  $C^{3'}$  or  $C^{5'}\text{OCOCH}^3$ ), 2.01 (s, 3H,  $C^{3'}$  or  $C^{5'}\text{OCOCH}^3$ ). Other  $H^{2'}$  or  $H^{2''}$  is under the DMSO peak.

**$^{13}\text{C}$  NMR** (126 MHz, DMSO- $d_6$ , ppm)  $\delta$  170.6 ( $C^{3'}$  or  $C^{5'}\text{OC}$ ), 170.5 ( $C^{3'}$  or  $C^{5'}\text{OC}$ ), 147.8 ( $C^4$  or  $C^5$ ), 146.7 ( $C^4$  or  $C^5$ ), 145.1 ( $C^2$  or  $C^8$ ), 145.0 ( $C^2$  or  $C^8$ ), 123.7 ( $C^6$ ), 122.5 ( $C^1$ ), 84.5 ( $C^{1'}$ ), 82.2 ( $C^{4'}$ ), 74.8 ( $C^{3'}$ ), 64.0 ( $C^{5'}$ ), 35.8 ( $C^2$ ), 21.3 ( $C^{3'}$  or  $C^{5'}\text{OCOC}$ ), 21.0 ( $C^{3'}$  or  $C^{5'}\text{OCOC}$ ).

**HRMS** (ESI)  $m/z$ :  $[M+H]^+$  calcd for  $\text{C}_{15}\text{H}_{17}\text{BrN}_3\text{O}_5$  398.03461; found, 398.0349.

## 2'-Deoxy-deaza-6- $^{15}\text{N}$ -benzamidepurine (**58**)

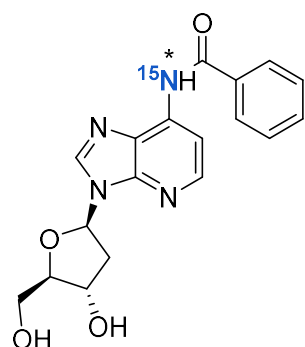

An oven-dried vial under an argon atmosphere was charged with  $\text{Pd}_2\text{dba}_3 \cdot \text{CHCl}_3$  (15 mg, 15  $\mu\text{mol}$ , 5 mol%) and 1,1'-bis-(diphenylphosphino) ferrocene (dppf) (25 mg, 45  $\mu\text{mol}$ , 15 mol%). The vial was capped with a rubber septum, and a solution of acetate protected nucleoside **52** (120 mg, 301  $\mu\text{mol}$ , 1 equiv.) in toluene (1.3 mL) was added dropwise. Then, benzamide (44 mg, 362  $\mu\text{mol}$ , 1.2 equiv.) and  $\text{Cs}_2\text{CO}_3$  (137 mg, 422  $\mu\text{mol}$ , 1.40 equiv.) were added and the reaction mixture was stirred at 80  $^\circ\text{C}$  for 4 h. After complete consumption of the starting nucleoside (determined by thin-layer chromatography), the resulting brown suspension was allowed to cool to rt, diluted in MeOH, filtered using a syringe filter and concentrated in *vacuo*. The residue was loaded onto silica gel and purified by flash column chromatography (silica gel, 0-6% Toluene / MeOH) to obtain 2'-deoxy-deaza-6- $^{15}\text{N}$ -benzamidepurine (**58**) (48 mg, 45%) as an off white solid.

**$^1\text{H}$  NMR** (400 MHz, DMSO- $d_6$ , ppm)  $\delta$  10.40 (d,  $J^{H-^{15}\text{N}} = 91.3$  Hz, 1H, NH), 8.65 (s, 1H,  $H^8$ ), 8.33 (d,  $J = 5.5$  Hz, 1H,  $H^1$  or  $H^2$ ), 8.06 – 8.02 (m, 3H,  $H^1$  or  $H^2$  and  $C^6\text{bzH}^{\text{meta}}$  or  $C^6\text{bzH}^{\text{ortho}}$ ), 7.69 – 7.63 (m, 1H,  $C^6\text{bzH}^{\text{para}}$ ), 7.61 – 7.54 (m, 2H,  $C^6\text{bzH}^{\text{meta}}$  or  $C^6\text{bzH}^{\text{ortho}}$ ), 6.52 (dd,  $J = 7.8$ , 6.0 Hz, 2H,  $H^{1'}$ ), 5.33 (d,  $J = 4.1$  Hz, 1H,  $\text{OH}^{3'}$ ), 5.16 (dd,  $J = 6.4$ , 5.0 Hz, 1H,  $\text{OH}^{5'}$ ), 4.50 – 4.43 (app m, 1H,  $H^{3'}$ ), 3.92 (app td,  $J = 4.4$ , 2.7 Hz, 1H,  $H^{4'}$ ), 3.66 (app dt,  $J = 11.8$ , 4.8 Hz, 1H,  $H^{5'}$  or  $H^{5''}$ ), 3.55 (ddd,  $J = 11.8$ , 6.4, 4.4 Hz, 1H,  $H^{5'}$  or  $H^{5''}$ ), 2.82 (ddd,  $J = 13.3$ , 7.7, 5.8 Hz, 1H,  $H^{2'}$  or  $H^{2''}$ ), 2.33 (app ddt,  $J = 9.3$ , 6.2, 3.1 Hz, 1H,  $H^{2'}$  or  $H^{2''}$ ).

**$^{13}\text{C}\{^1\text{H}\}$ -NMR** (101 MHz, DMSO- $d_6$ , ppm)  $\delta$  166.0(CO), 147.0( $C^4$  or  $C^5$ ), 144.7( $C^1$  or  $C^2$ ), 142.2( $C^8$ ), 137.2 (d,  $J^{15\text{N}} = 15.3$  Hz,  $C^6$ ), 132.2( $C^6\text{bzC}^{\text{para}}$ ), 128.5( $C^6\text{bzC}^{\text{meta}}$  or  $C^6\text{bzC}^{\text{ortho}}$ ), 127.9( $C^6\text{bzC}^{\text{meta}}$  or  $C^6\text{bzC}^{\text{ortho}}$ ), 126.8( $C^4$  or  $C^5$ ), 109.1( $C^1$  or  $C^2$ ), 87.9( $C^{4'}$ ), 83.9( $C^{1'}$ ), 70.9( $C^{3'}$ ), 61.8 ( $C^{5'}$ ). \* $C^{2'}$  carbon is in the DMSO peak.

**HRMS** (ESI) *m/z*: [M+H] Calcd for C<sub>18</sub>H<sub>19</sub>N<sub>3</sub><sup>15</sup>NO<sub>4</sub> 354.12147; found, 354.1227.

## 6. References

1. T. Wenzel and F. Seela, *Helvetica Chimica Acta*, 2004, **79**, 169-178.
2. S. Dey, C. L. Ruhl and A. Jaschke, *Chemistry*, 2017, **23**, 12162-12170.
3. F. Yang, Y. Zhu and B. Yu, *Chem Commun (Camb)*, 2012, **48**, 7097-7099.
4. T. S. Rao, R. F. Rando, J. H. Huffman and G. R. Revankar, *Nucleosides and Nucleotides*, 1995, **14**, 1997-2008.
5. W. Kabsch, *Acta Crystallographica Section D*, 2010, **66**, 125-132.
6. P. Evans, *Acta Crystallogr D Biol Crystallogr*, 2006, **62**, 72-82.
7. G. Winter, *Journal of Applied Crystallography*, 2010, **43**, 186-190.
8. A. Vagin and A. Teplyakov, *Journal of Applied Crystallography*, 1997, **30**, 1022-1025.
9. S. Armstrong, W. J. Cook, S. A. Short and S. E. Ealick, *Structure*, 1996, **4**, 97-107.
10. P. Emsley and K. Cowtan, *Acta Crystallogr D Biol Crystallogr*, 2004, **60**, 2126-2132.
11. G. N. Murshudov, A. A. Vagin and E. J. Dodson, *Acta Crystallogr D Biol Crystallogr*, 1997, **53**, 240-255.
12. X. Xu, S. Yan, J. Hu, P. Guo, L. Wei, X. Weng and X. Zhou, *Tetrahedron*, 2013, **69**, 9870-9874.
13. S. Fernández-García, V. O. Chantzakou and F. Juliá-Hernández, *Angewandte Chemie International Edition*, 2024, **63**, e202311984.
14. D. Tauraitė, J. Jakubovska, J. Dabužinskaitė, M. Bratchikov and R. Meškys, *Journal*, 2017, **22**.
15. K. Kraszewska, I. Kaczyńska, S. Jankowski, J. Karolak-Wojciechowska and E. Sochacka, *Bioorganic & Medicinal Chemistry*, 2011, **19**, 2443-2449.
16. X.-Y. Jin, Y.-M. He, T.-H. Hui, L. Liu and L. Cheng, *The Journal of Organic Chemistry*, 2024, **89**, 3597-3604.
17. M. J. Robins, M. MacCoss, S. R. Naik and G. Ramani, *Journal of the American Chemical Society*, 1976, **98**, 7381-7389.
18. T. Suzuki, A. Ozawa-Tamura, M. Takeuchi and Y. Sasabe, *Chemical and Pharmaceutical Bulletin*, 2021, **69**, 1067-1074.
19. C. H. Hwang, J. S. Park, J. H. Won, J. N. Kim and E. K. Ryu, *Archives of Pharmacal Research*, 1992, **15**, 69-72.
20. J. von Watzdorf and A. Marx, *ChemBioChem*, 2016, **17**, 1532-1540.
21. Z. Janeba, X. Lin and M. J. Robins, *Nucleosides, Nucleotides & Nucleic Acids*, 2004, **23**, 137-147.
22. R. F. Schinazi, J. W. Mellors, N. P. Sluis-Cremer, S. J. Coats, R. A. Whitaker, B. D. Herman, J. H. Cho, L. Zhou and H. Zhang, *Journal*, 2014.
23. R. Xia, L.-S. Chen, S.-H. Xu, C. Xia and L.-P. Sun, *Nucleosides, Nucleotides & Nucleic Acids*, 2022, **41**, 593-604.
24. P. Leonczak, P. Srivastava, O. Bande, G. Schepers, E. Lescrinier and P. Herdewijn, *The Journal of Organic Chemistry*, 2019, **84**, 13394-13409.
25. M. J. Uddin, M. I. Schulte, L. Maddukuri, J. Harp and L. J. Marnett, *Nucleosides, Nucleotides & Nucleic Acids*, 2010, **29**, 831-840.
26. H. Challa and T. C. Bruice, *Bioorganic & Medicinal Chemistry*, 2004, **12**, 1475-1481.



27. H. Yehia, S. Westarp, V. Röhrs, F. Kaspar, R. T. Giessmann, H. F. T. Klare, K. Paulick, P. Neubauer, J. Kurreck and A. Wagner, *Journal*, 2020, **25**.
28. F. Seela, Y. Chen, U. Bindig and Z. Kazimierczuk, *Helvetica Chimica Acta*, 1994, **77**, 194-202.

## 7. Analytical Section

### 2'-Deoxy-deaza-6-chloropurine (11)

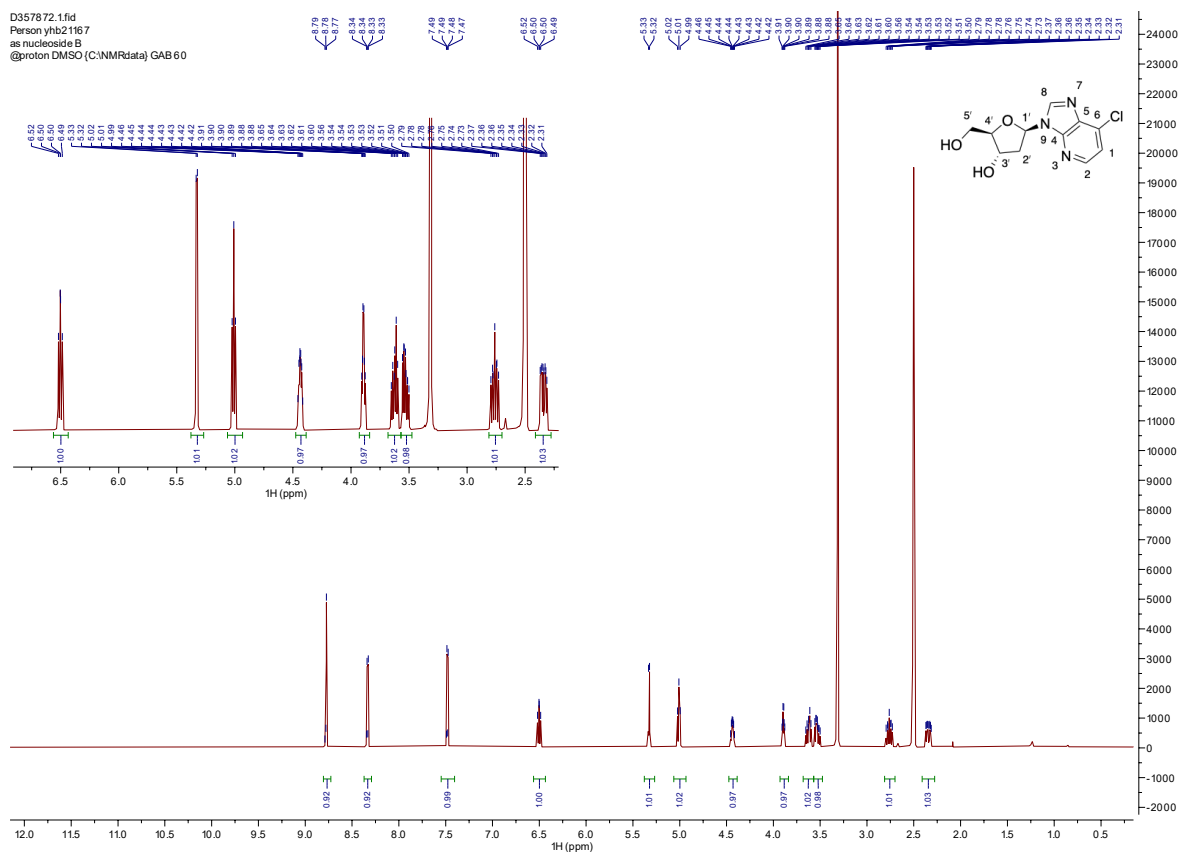

Figure S9 -  $^1\text{H}$  NMR spectra of nucleoside 11

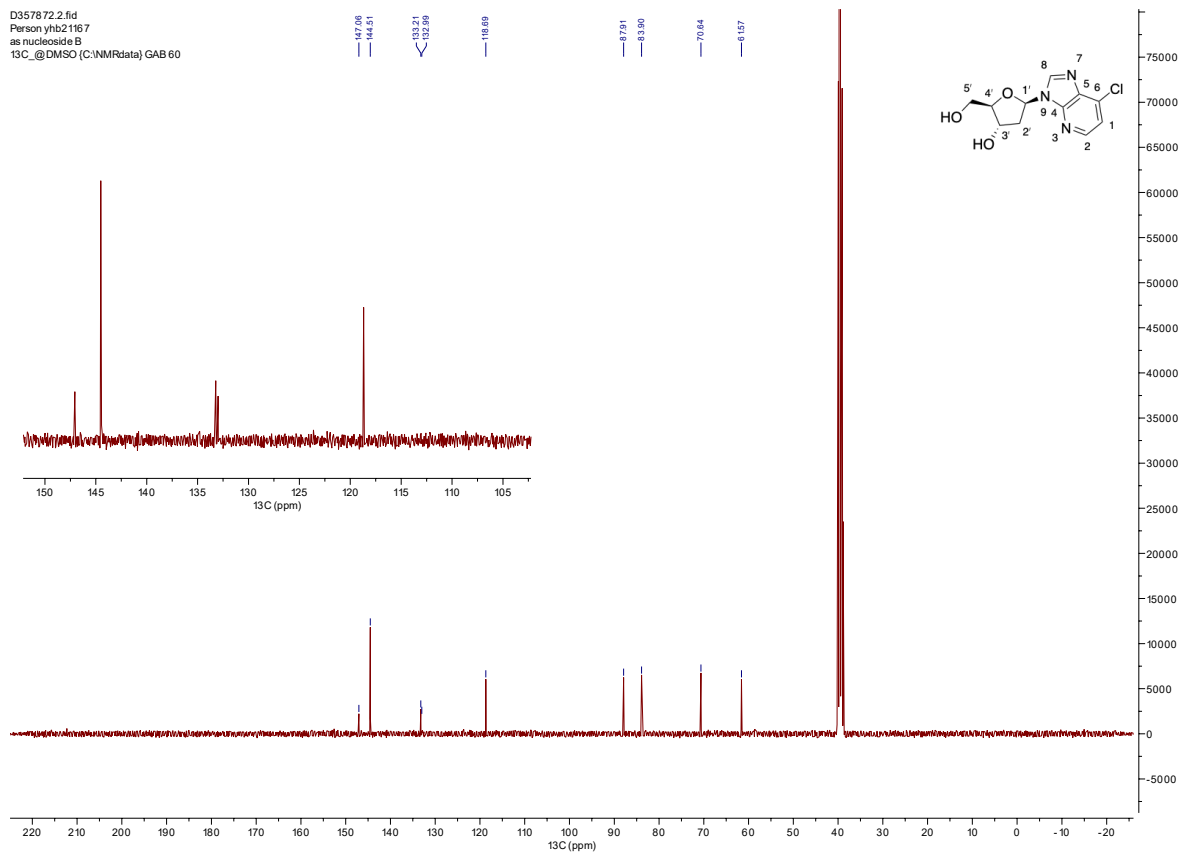

Sample Name : BAS028  
Sample ID :  
Data Filename : REACTIONS\_24022022\_016.lcd  
Method Filename : Admir Trans glyco Run.lcm  
Batch Filename : REACTIONS.lcb  
Vial # : 1-24  
Injection Volume : 10  $\mu\text{L}$   
Date Acquired : 24/02/2022 18:00:28  
Date Processed : 24/02/2022 18:11:48

Sample Type : Unknown  
Acquired by : Shimadzu  
Processed by : Shimadzu

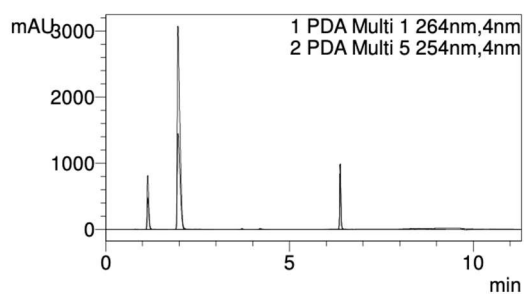

| Peak# | Ret. Time | Area     | Height  | ID# |
|-------|-----------|----------|---------|-----|
| 1     | 0.798     | 4083     | 1981    |     |
| 2     | 1.008     | 2468     | 615     |     |
| 3     | 1.140     | 2418160  | 810891  |     |
| 4     | 1.964     | 14967389 | 3049604 |     |
| 5     | 2.441     | 3082     | 942     |     |
| 6     | 2.547     | 5133     | 1451    |     |
| 7     | 3.703     | 22347    | 8586    |     |
| 8     | 4.202     | 40872    | 10019   |     |
| 9     | 6.088     | 1292     | 277     |     |
| 10    | 6.375     | 1804083  | 818195  |     |
| 11    | 8.300     | 43018    | 6738    |     |
| 12    | 8.635     | 43211    | 2317    |     |
| 13    | 8.736     | 6000     | 1863    |     |

Figure S11 - HPLC trace from the reaction used to obtain Nucleoside 11. R.T- 1.14 = cytosine nucleobase released, 1.96 = nucleoside dC, 6.38 = target nucleoside 11.



## 2'-Deoxy-5-fluorouracil (12)

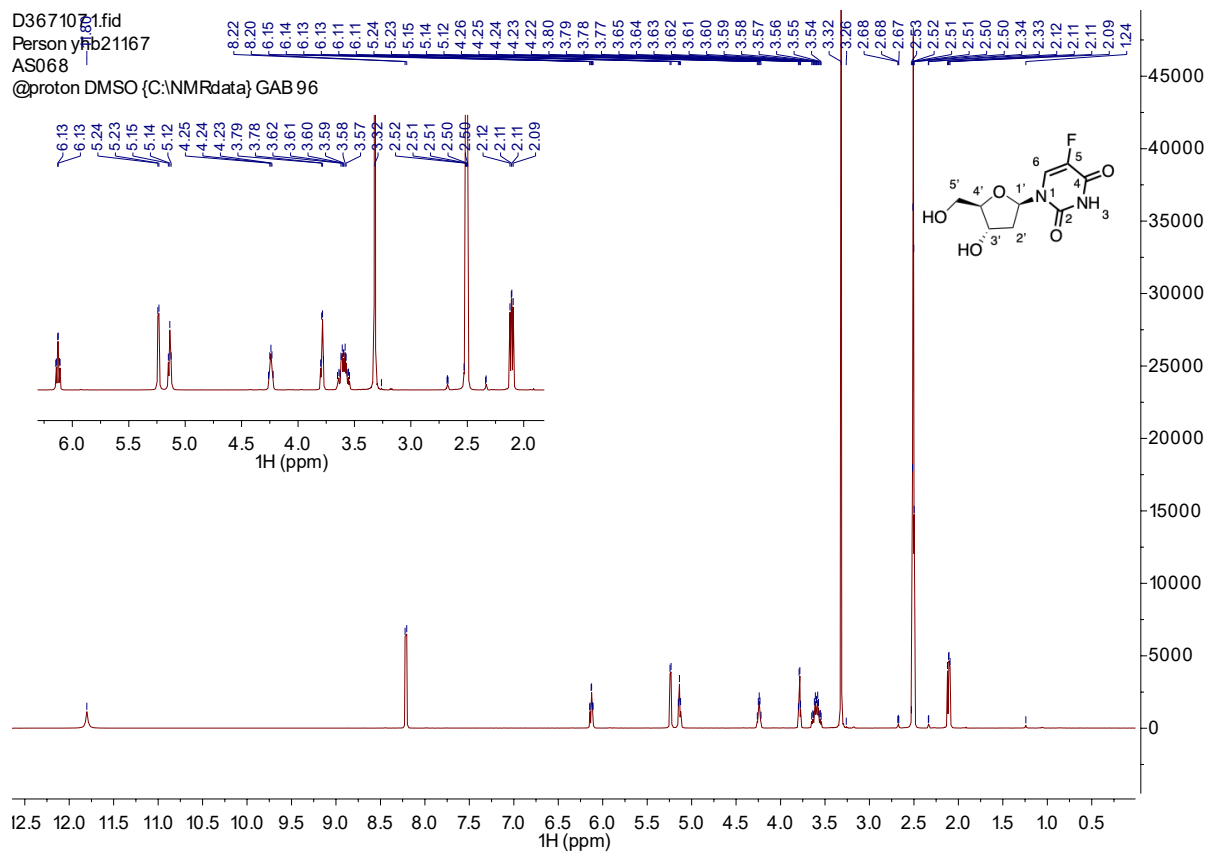

Figure S14 -  $^1\text{H}$  NMR spectrum of nucleoside 12

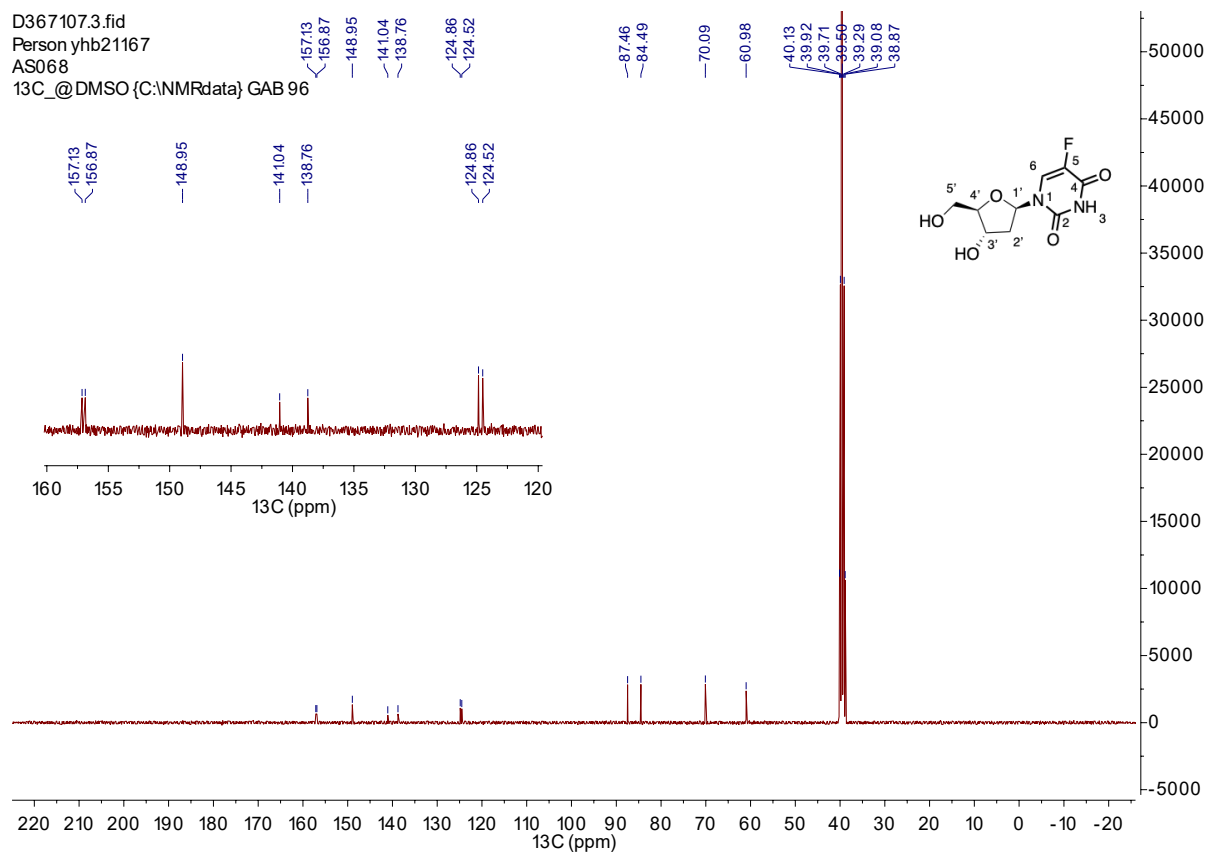

Figure S15 -  $^{13}\text{C}$  NMR spectrum of nucleoside 11

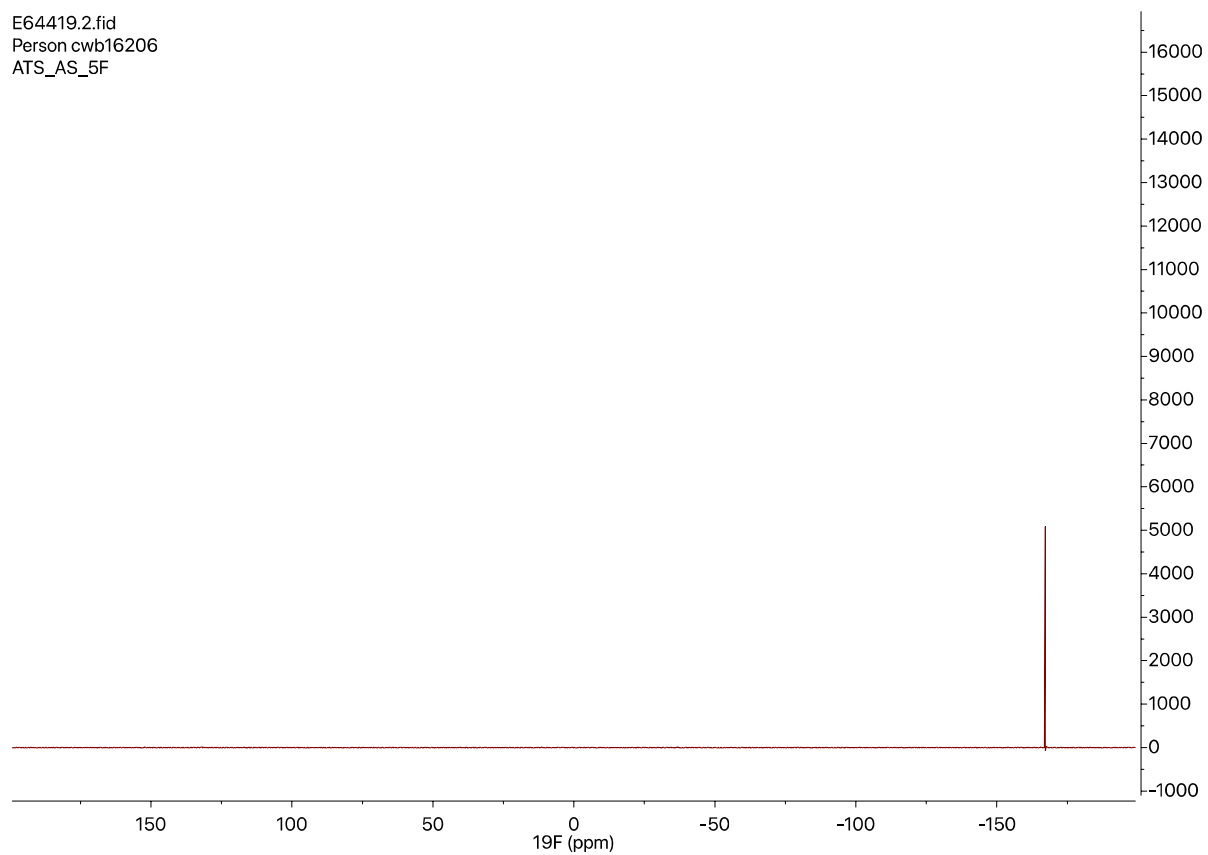

Figure S16 -  $^{19}\text{F}$  NMR spectrum of nucleoside 11

Sample Name : AS068  
 Sample ID :  
 Data Filename : AS068 - 5FU\_AS068\_001.lcd  
 Method Filename : Admir Trans glyco Run.lcm  
 Batch Filename : AS068 - 5FU.lcb  
 Vial # : 1-3  
 Injection Volume : 10 uL  
 Date Acquired : 01/11/2022 16:25:33  
 Date Processed : 01/11/2022 16:36:54

Sample Type : Unknown  
 Acquired by : Shimadzu  
 Processed by : Shimadzu

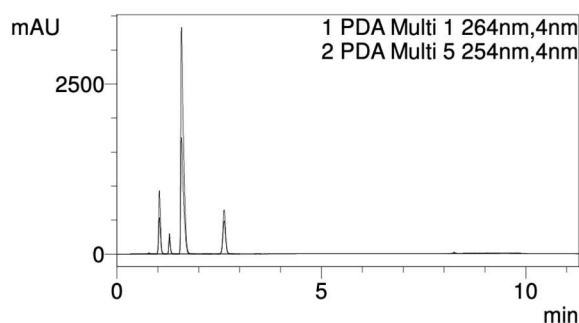

| Peak# | Ret. Time | Area     | Height  | ID# |
|-------|-----------|----------|---------|-----|
| 1     | 0.787     | 52625    | 19630   |     |
| 2     | 1.040     | 2854477  | 906639  |     |
| 3     | 1.286     | 753193   | 295354  |     |
| 4     | 1.581     | 15433221 | 3304531 |     |
| 5     | 2.189     | 7311     | 1805    |     |
| 6     | 2.624     | 2937292  | 642168  |     |
| 7     | 3.447     | 2185     | 754     |     |
| 8     | 8.056     | 1156     | 144     |     |
| 9     | 8.248     | 48781    | 17513   |     |
| 10    | 8.436     | 3236     | 639     |     |
| 11    | 8.600     | 7724     | 1286    |     |
| 12    | 8.606     | 2100     | 1021    |     |

Figure S17 - HPLC spectrum. R.T = 1.04 = nucleobase cytosine, 1.29 = nucleobase , 1.58 = nucleoside dC, 2.62 = nucleoside 11

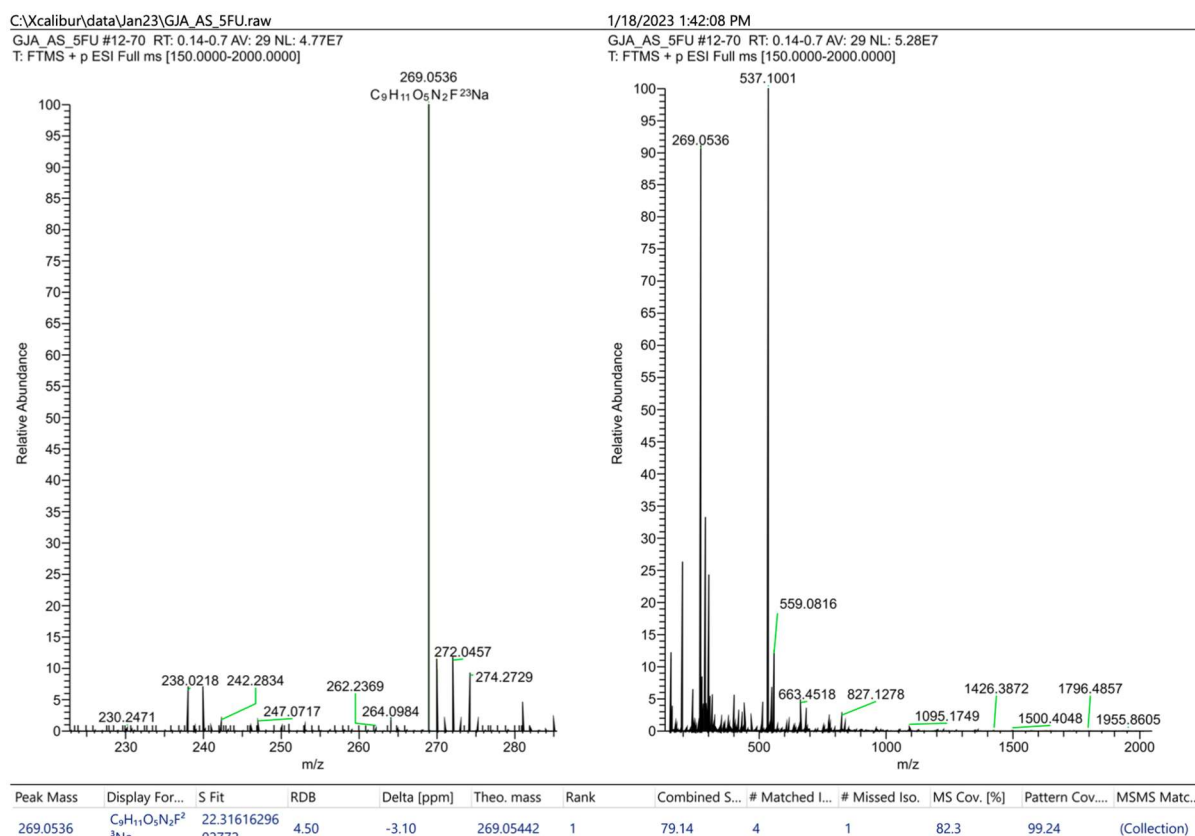

Figure S18 - HRMS spectrum of 11

## 2'-Deoxy-5-ethynyluridine (3)

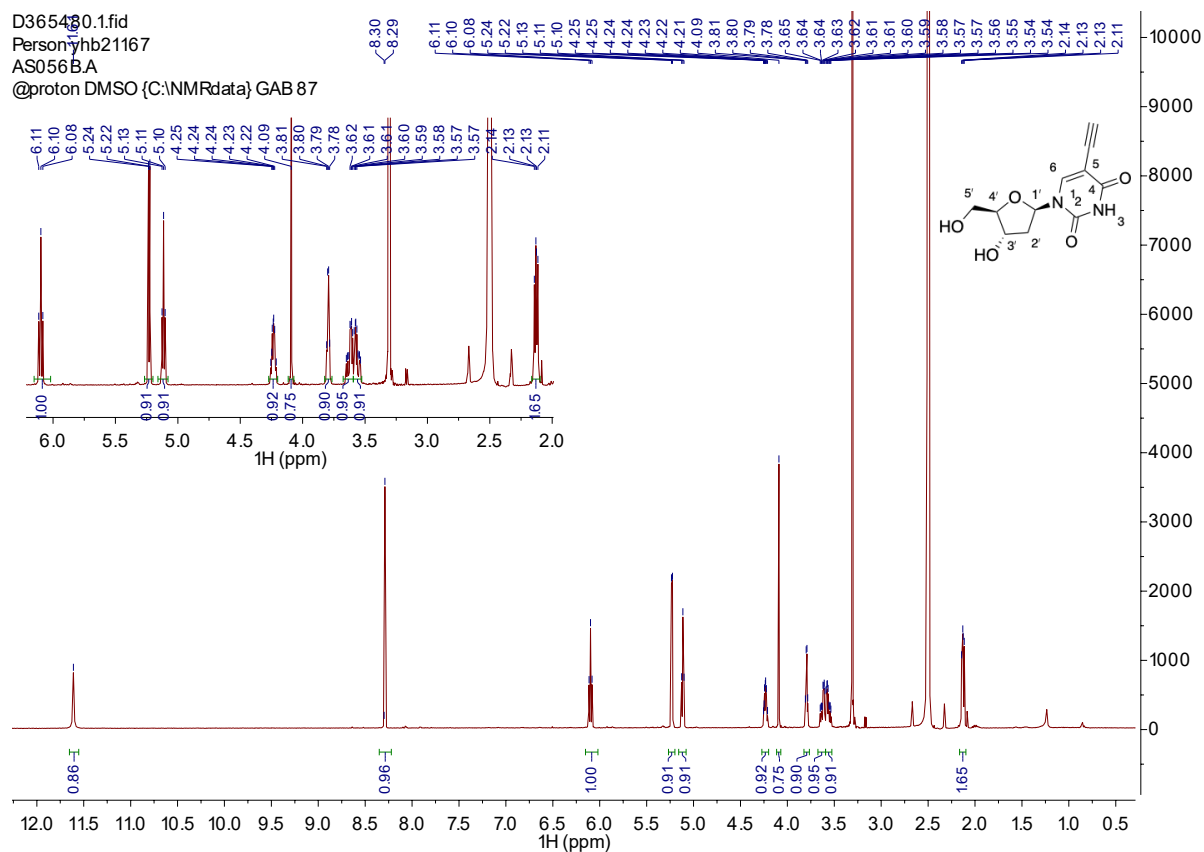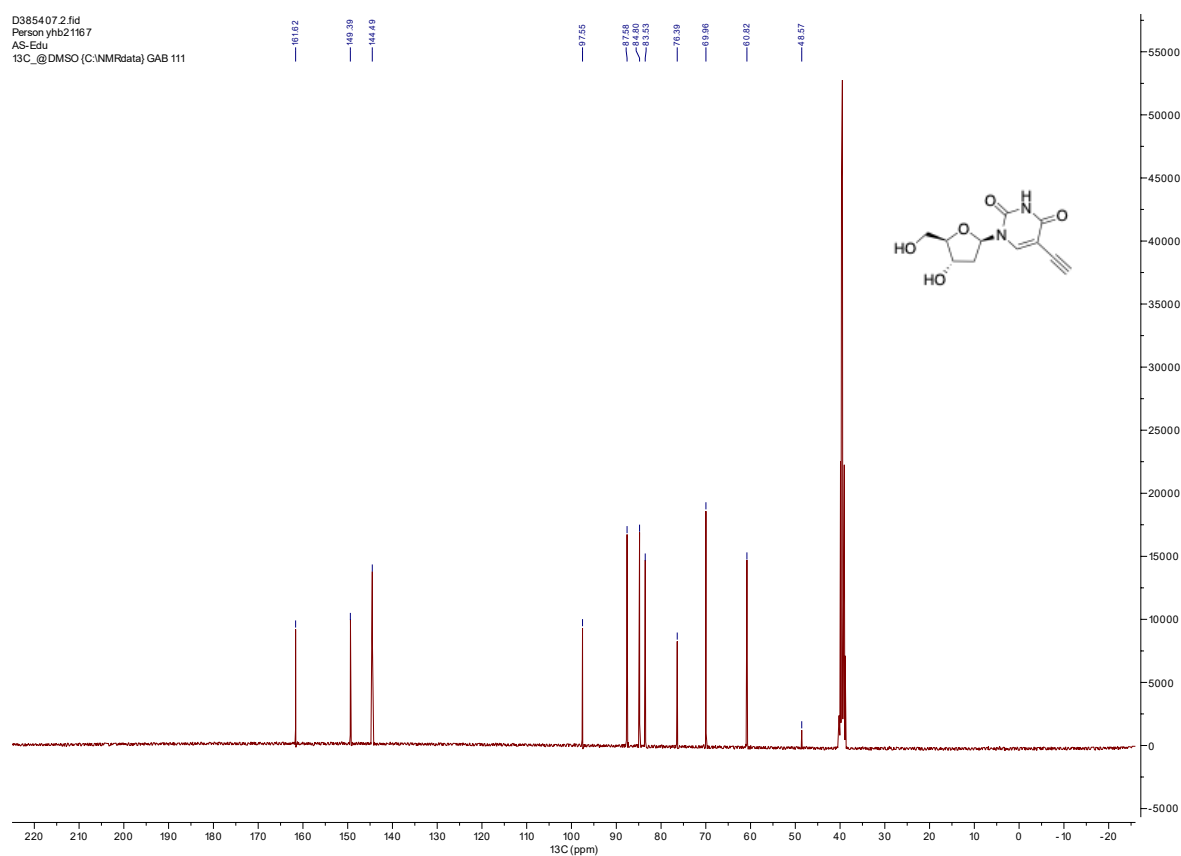

Sample Name : 1 RXN (X20 DC)  
 Sample ID :  
 Data Filename : 1 RXNS\_31052022\_006.lcd  
 Method Filename : Admir Trans glyco Run.lcm  
 Batch Filename : 1 RXNS.lcb  
 Vial # : 1-67  
 Injection Volume : 10 uL  
 Date Acquired : 31/05/2022 11:31:32  
 Date Processed : 31/05/2022 11:42:52

Sample Type : Unknown

Acquired by : Shimadzu  
 Processed by : Shimadzu

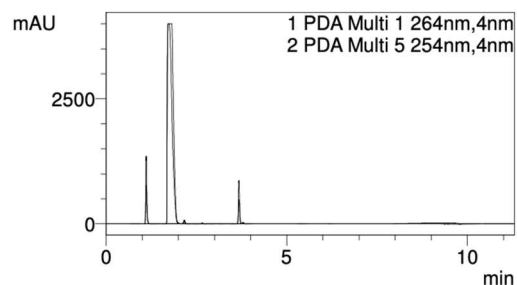

| Peak# | Ret. Time | Area     | Height  | ID# |
|-------|-----------|----------|---------|-----|
| 1     | 0.792     | 7834     | 3277    |     |
| 2     | 0.880     | 1434     | 533     |     |
| 3     | 1.110     | 2907287  | 1335128 |     |
| 4     | 1.295     | 3448     | 741     |     |
| 5     | 1.801     | 45399827 | 4000150 |     |
| 6     | 2.164     | 215611   | 72594   |     |
| 7     | 2.380     | 20804    | 6303    |     |
| 8     | 2.661     | 45634    | 13927   |     |
| 9     | 2.899     | 2026     | 630     |     |
| 10    | 3.054     | 29344    | 6052    |     |
| 11    | 3.493     | 1007     | 347     |     |
| 12    | 3.678     | 1973171  | 858740  |     |
| 13    | 3.790     | 82075    | 31685   |     |
| 14    | 3.952     | 1861     | 557     |     |
| 15    | 5.397     | 2669     | 370     |     |
| 16    | 6.185     | 1903     | 828     |     |
| 17    | 8.266     | 36439    | 3513    |     |
| 18    | 8.330     | 16576    | 4110    |     |
| 19    | 8.447     | 31445    | 4791    |     |
| 20    | 8.604     | 55315    | 5234    |     |
| 21    | 8.704     | 17751    | 5352    |     |
| 22    | 8.760     | 41330    | 5579    |     |
| 23    | 8.910     | 50155    | 5585    |     |
| 24    | 9.064     | 35299    | 5666    |     |
| 25    | 9.152     | 42071    | 5843    |     |
| 26    | 9.280     | 49131    | 6010    |     |
| 27    | 9.424     | 35684    | 6209    |     |
| 28    | 9.536     | 90301    | 6418    |     |
| 29    | 10.074    | 58658    | 2393    |     |
| 30    | 10.694    | 13008    | 519     |     |
| Total |           | 51269097 | 6399083 |     |

Figure S21 - HPLC trace for the reaction used to obtain nucleoside **3**. R.T = 1.11 = nucleobase cytosine, 1.8 = nucleoside dC, 2.16 = nucleobase 1, 3.67 = nucleoside **3**



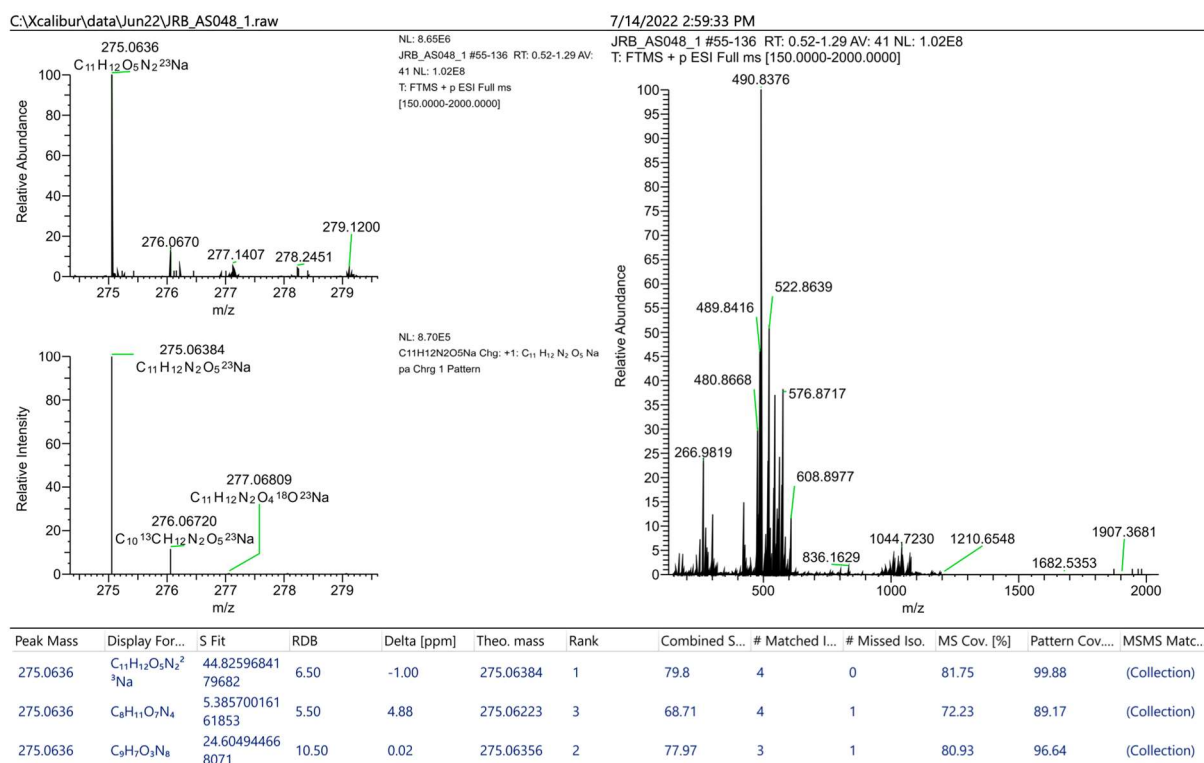

Figure S22 - HRMS spectra for nucleoside **3**

## 2'-Deoxy-5-iodouridine (14)

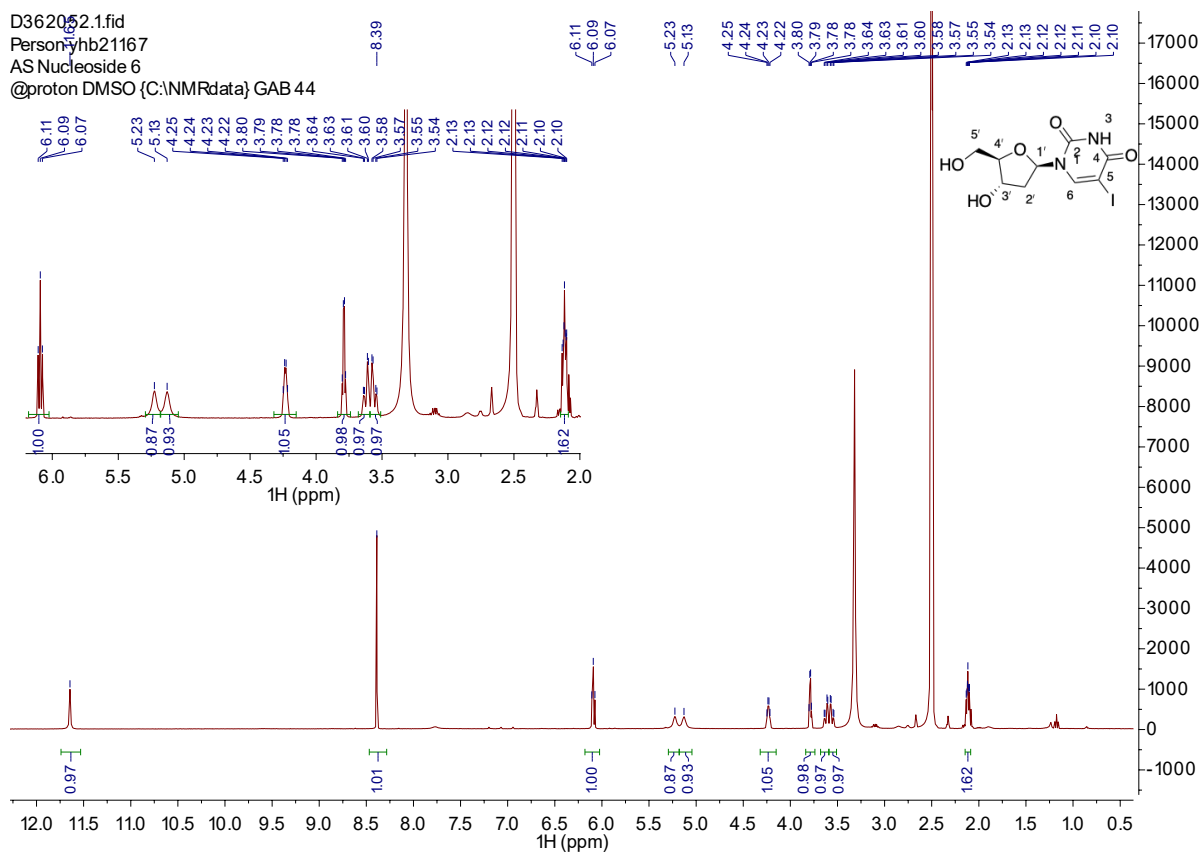

Figure S23 - <sup>1</sup>H NMR spectra of nucleoside **14**

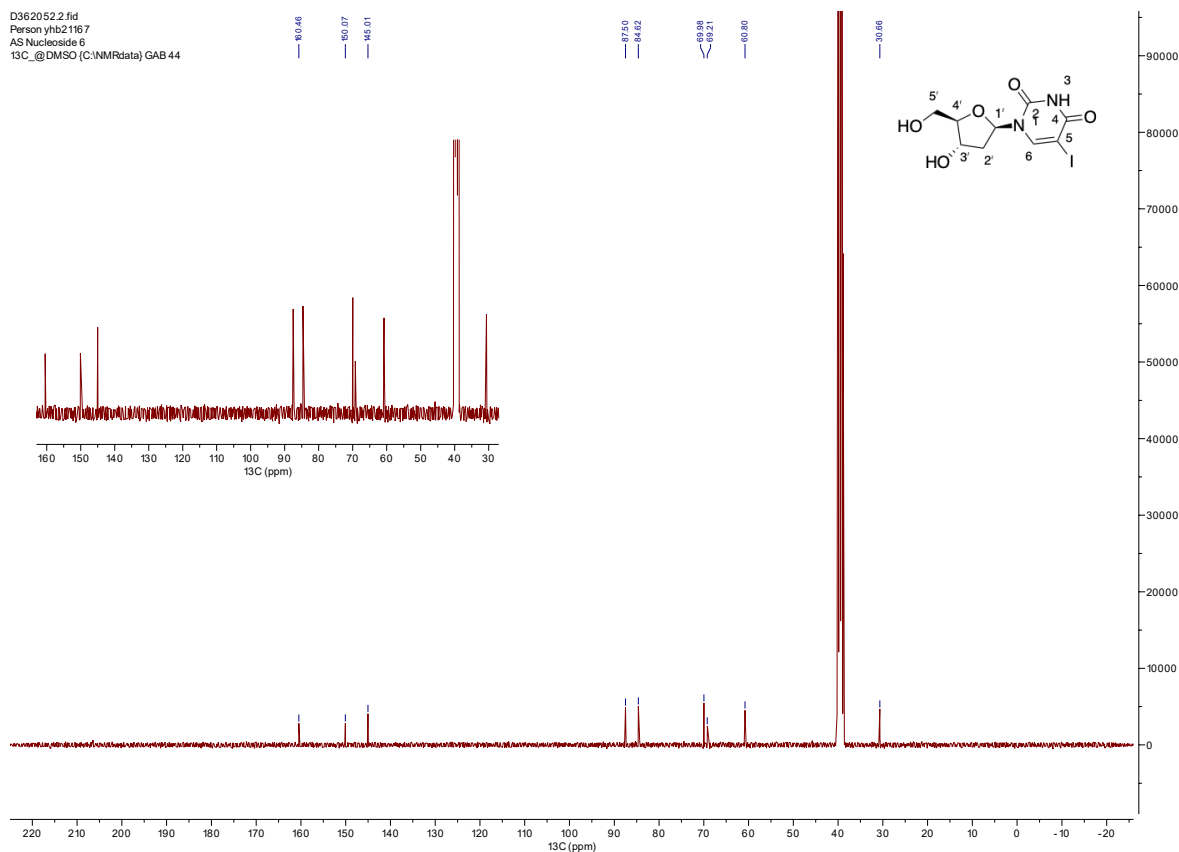

Sample Name : 6 RXN  
Sample ID :  
Data Filename : RXNS\_16052022\_005.lcd  
Method Filename : Admir Trans glyco Run.lcm  
Batch Filename : RXNS.lcb  
Vial # : 1-6  
Injection Volume : 10 uL  
Date Acquired : 16/05/2022 11:37:43  
Date Processed : 16/05/2022 11:49:03

Sample Type : Unknown  
Acquired by : Shimadzu  
Processed by : Shimadzu

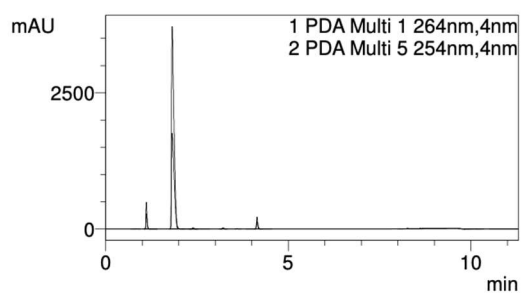

| Peak# | Ret. Time | Area     | Height  | ID# |
|-------|-----------|----------|---------|-----|
| 1     | 0.791     | 8609     | 3877    |     |
| 2     | 0.851     | 10616    | 4774    |     |
| 3     | 1.117     | 1023365  | 482375  |     |
| 4     | 1.297     | 5778     | 1965    |     |
| 5     | 1.824     | 17508738 | 3674741 |     |
| 6     | 2.394     | 62612    | 17925   |     |
| 7     | 3.218     | 59850    | 20838   |     |
| 8     | 3.597     | 21030    | 8806    |     |
| 9     | 3.925     | 1508     | 580     |     |
| 10    | 4.147     | 549528   | 213511  |     |
| 11    | 8.268     | 47587    | 8646    |     |
| 12    | 8.482     | 27702    | 2538    |     |
| 13    | 8.616     | 12479    | 2319    |     |
| 14    | 8.704     | 7288     | 1999    |     |
| 15    | 8.768     | 10658    | 1840    |     |
| 16    | 8.920     | 14689    | 1293    |     |
| 17    | 9.152     | 4611     | 545     |     |
| 18    | 10.077    | 62372    | 2489    |     |
| 19    | 10.710    | 11082    | 435     |     |
| Total |           | 19450102 | 4451498 |     |

Figure S25 - HPLC trace for the reaction used to obtain nucleoside **14**. R.T = 1.11 = nucleobase cytosine, 1.82 = nucleoside dC, 4.15 = nucleoside **14**

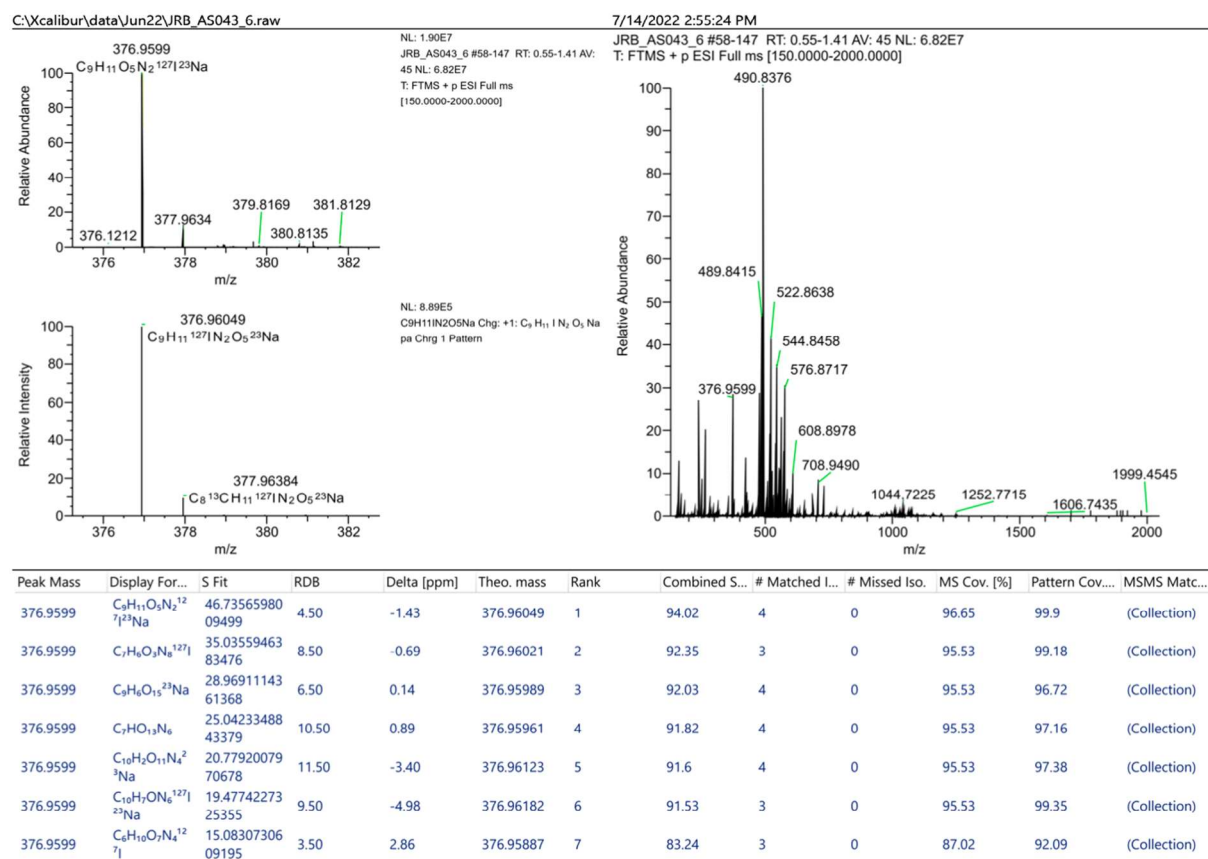

Figure S26 - HRMS for nucleoside 14

## 2'-Deoxy-5-Azidomethyluridine (15)

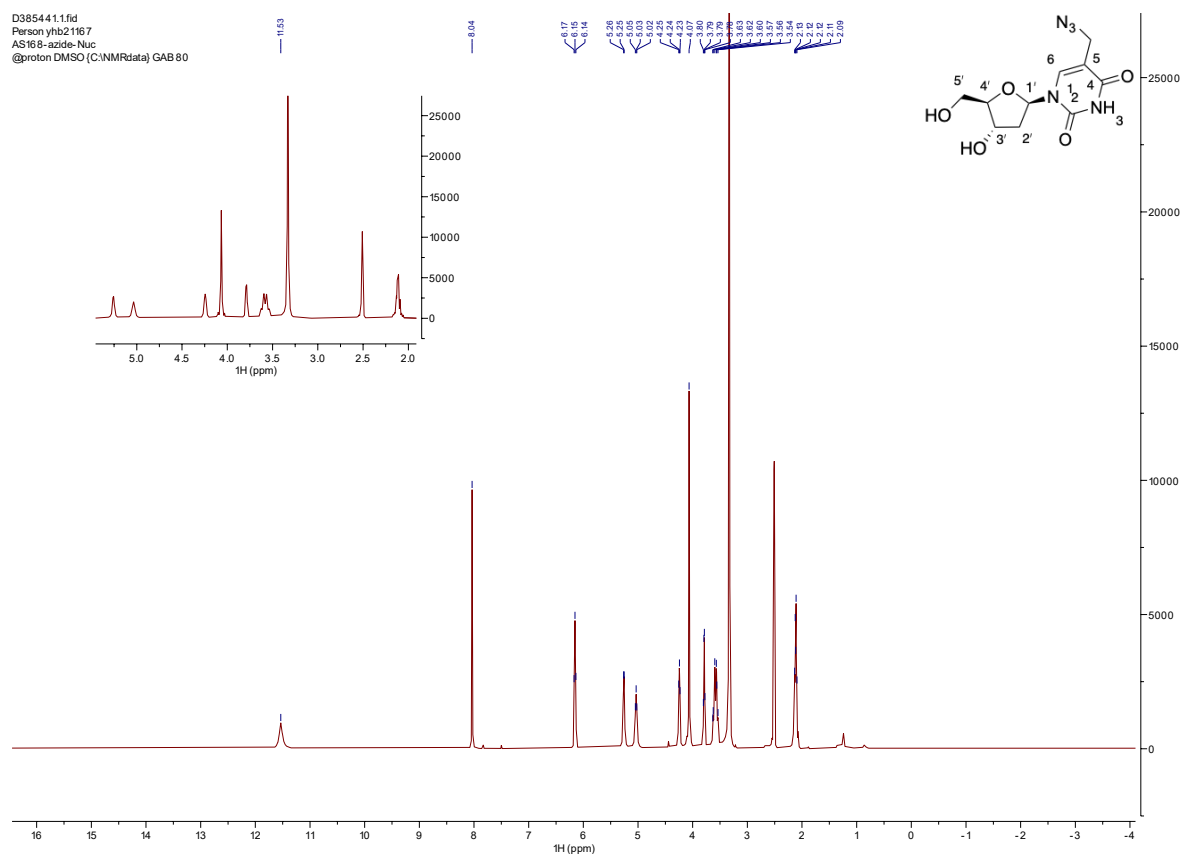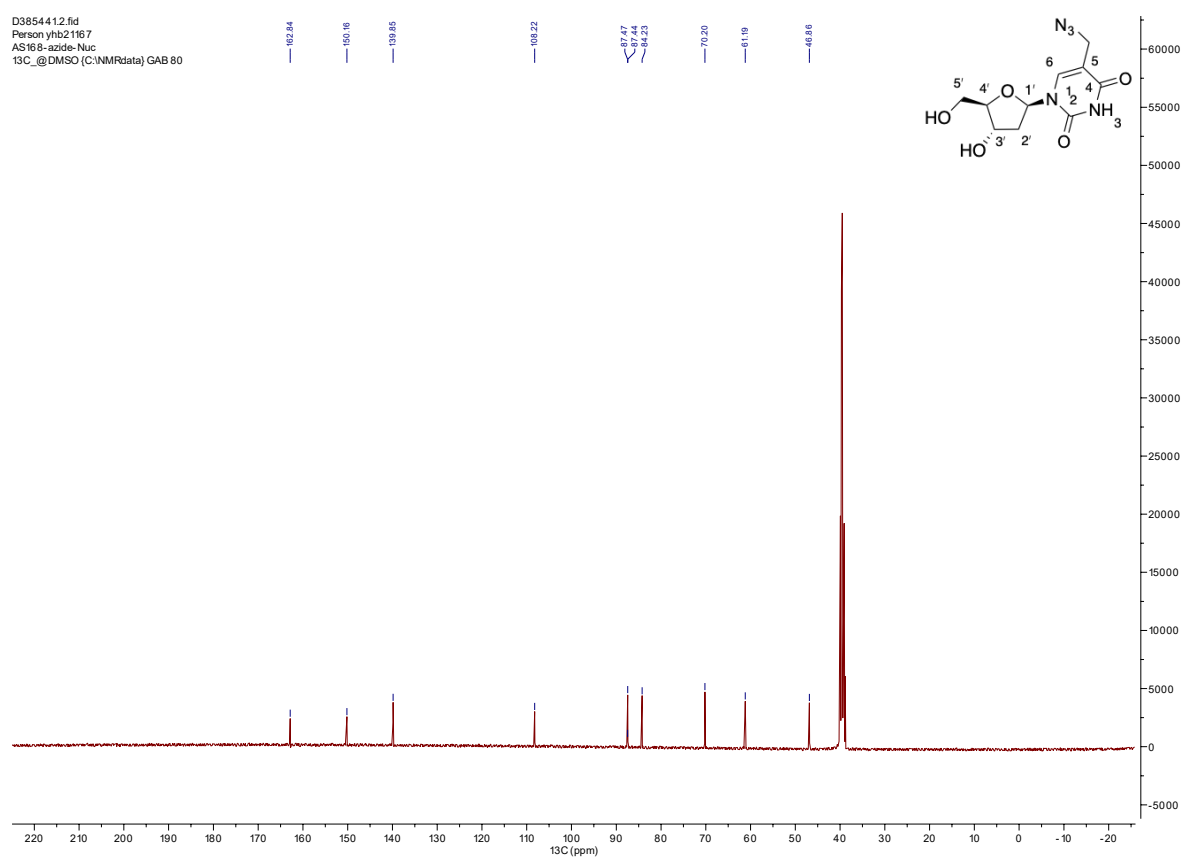

Sample Name : x10 0.4  
 Sample ID :  
 Data Filename : 0.4\_07022024\_004.lcd  
 Method Filename : Admir Trans glyco Run.lcm  
 Batch Filename : 0.4.lcb  
 Vial # : 1-19  
 Injection Volume : 10 uL  
 Date Acquired : 07/02/2024 13:54:19  
 Date Processed : 07/02/2024 14:05:40

Sample Type : Unknown  
 Acquired by : Shimadzu  
 Processed by : Shimadzu

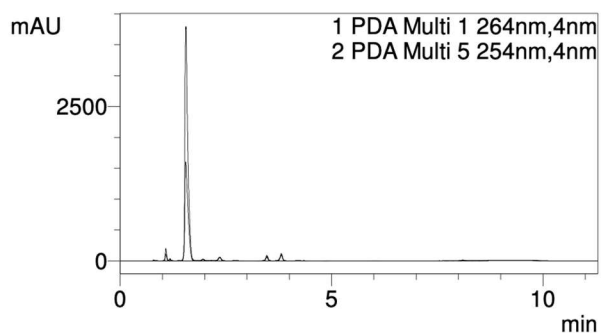

| PDA Ch1 264nm |           |          |         |     |
|---------------|-----------|----------|---------|-----|
| Peak#         | Ret. Time | Area     | Height  | ID# |
| 1             | 0.796     | 14288    | 10580   |     |
| 2             | 0.858     | 5503     | 2483    |     |
| 3             | 1.083     | 480695   | 190150  |     |
| 4             | 1.183     | 70638    | 32692   |     |
| 5             | 1.391     | 11365    | 3826    |     |
| 6             | 1.556     | 18298506 | 3781769 |     |
| 7             | 1.962     | 124826   | 26110   |     |
| 8             | 2.163     | 30957    | 5652    |     |
| 9             | 2.358     | 282466   | 58706   |     |
| 10            | 2.739     | 16937    | 2814    |     |
| 11            | 3.473     | 319135   | 83683   |     |
| 12            | 3.814     | 477530   | 116089  |     |
| 13            | 4.052     | 1053     | 254     |     |
| 14            | 4.204     | 18693    | 3835    |     |
| 15            | 4.350     | 3265     | 864     |     |
| 16            | 4.892     | 1713     | 373     |     |
| 17            | 6.038     | 1342     | 294     |     |
| 18            | 7.742     | 1152     | 304     |     |
| 19            | 8.103     | 43458    | 11963   |     |
| 20            | 8.224     | 5498     | 1448    |     |
| 21            | 8.424     | 3049     | 418     |     |
| 22            | 8.640     | 1930     | 197     |     |

Figure S29 - HPLC trace for the reaction used to obtain nucleoside **15**. R.T = 1.08 = released nucleobase cytosine, 1.27 = nucleobase, 1.55 = nucleoside dC, 2.3 = nucleobase, 3.47 = nucleoside **15**

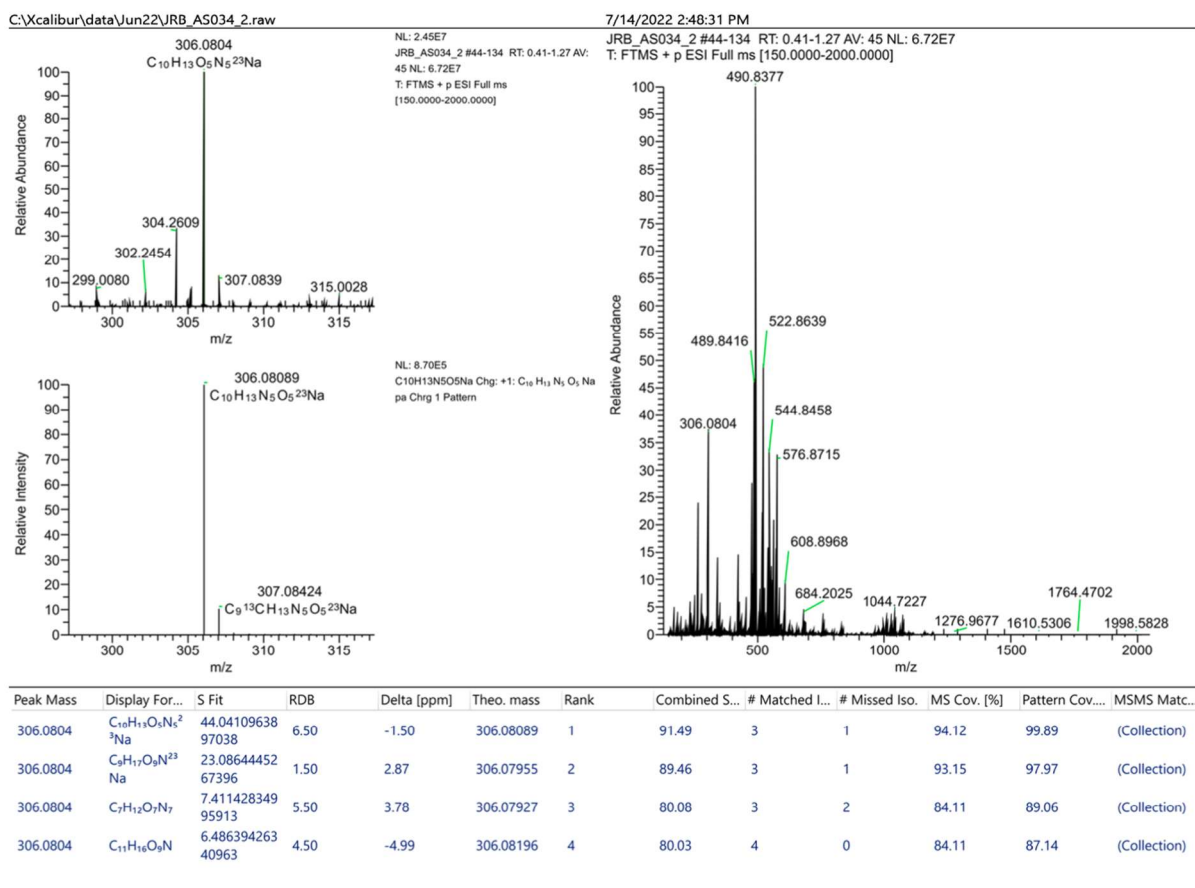

Figure S30 - HRMS for nucleoside 15

## 2'-Deoxy-5-hydroxymethyluridine (18)

D378852.1.fid  
Person yhb21167  
AS\_1\_nucleoside  
@proton DMSO (C:\NMR\data) GAB 80

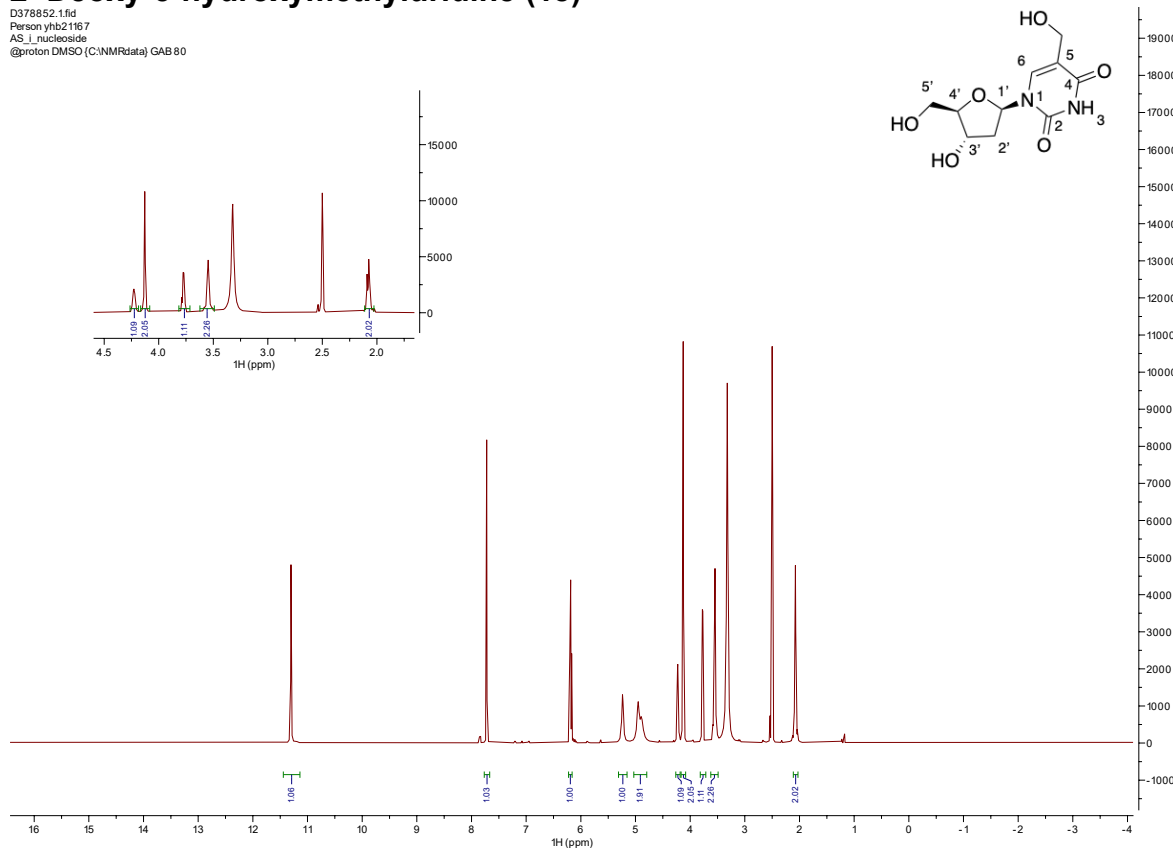

Figure S31 - <sup>1</sup>H NMR spectra for nucleoside 18

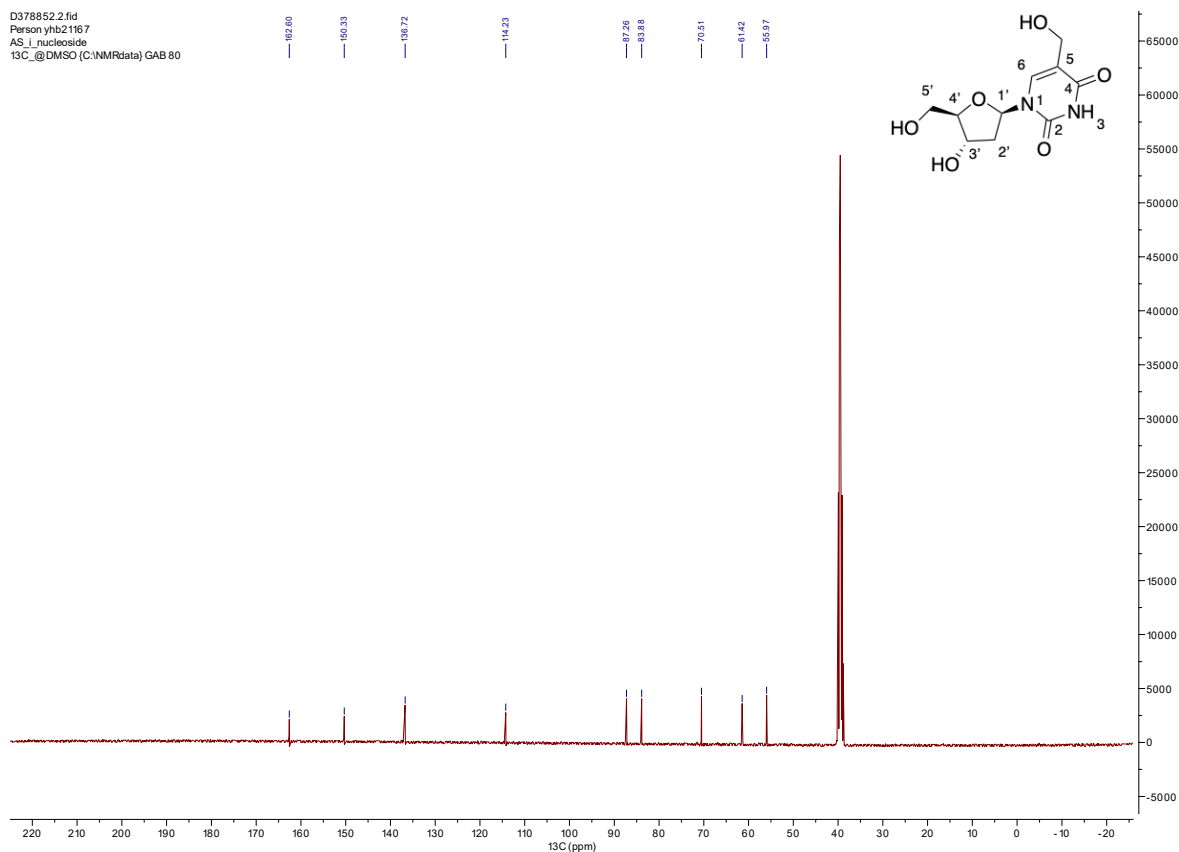

Sample Name : BASE I RXN  
Sample ID :  
Data Filename : BASE I RXN\_17032022\_003.lcd  
Method Filename : Admir Trans glyco Run.lcm  
Batch Filename : BASE I RXN.lcb  
Vial # : 1-54  
Injection Volume : 10  $\mu\text{L}$   
Date Acquired : 17/03/2022 19:31:14  
Date Processed : 17/03/2022 19:42:35

Sample Type : Unknown  
Acquired by : Shimadzu  
Processed by : Shimadzu

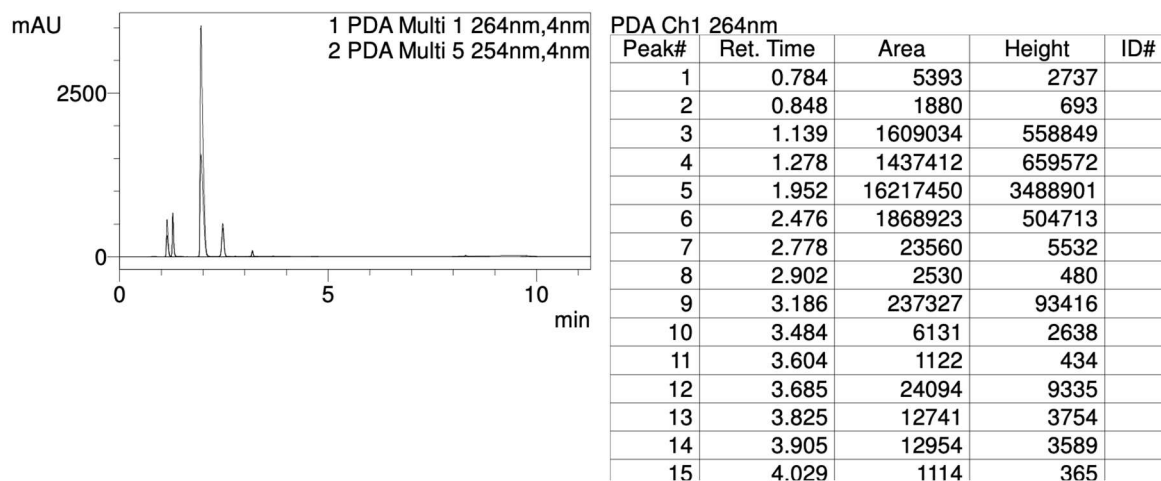

Figure S33 - HPLC trace for the reaction used to obtain nucleoside **18**. R.T = 1.1 = released nucleobase cytosine, 1.27 = nucleobase, 1.95 = nucleoside dC, 2.4 = nucleoside **18**

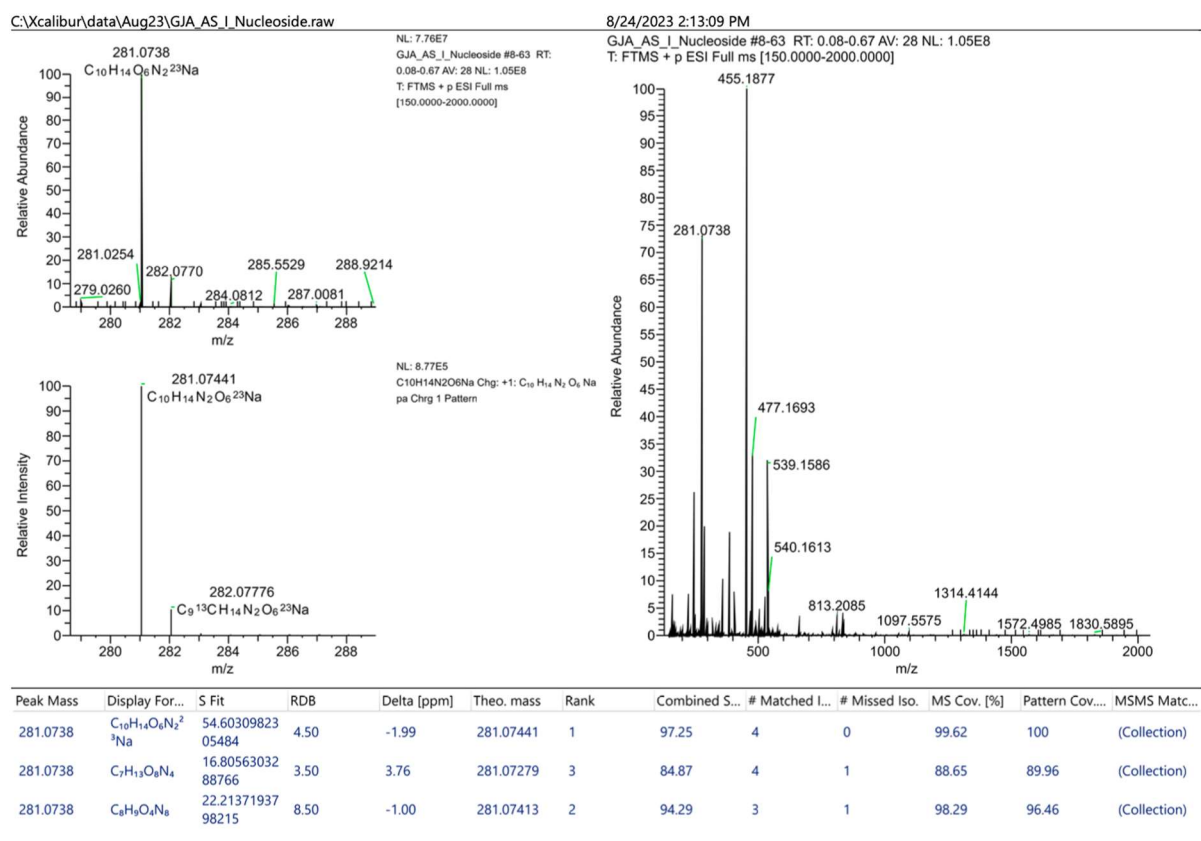

Figure S34 - HRMS for nucleoside **18**

## 2'-Deoxy-5-nitrouridine (**20**)



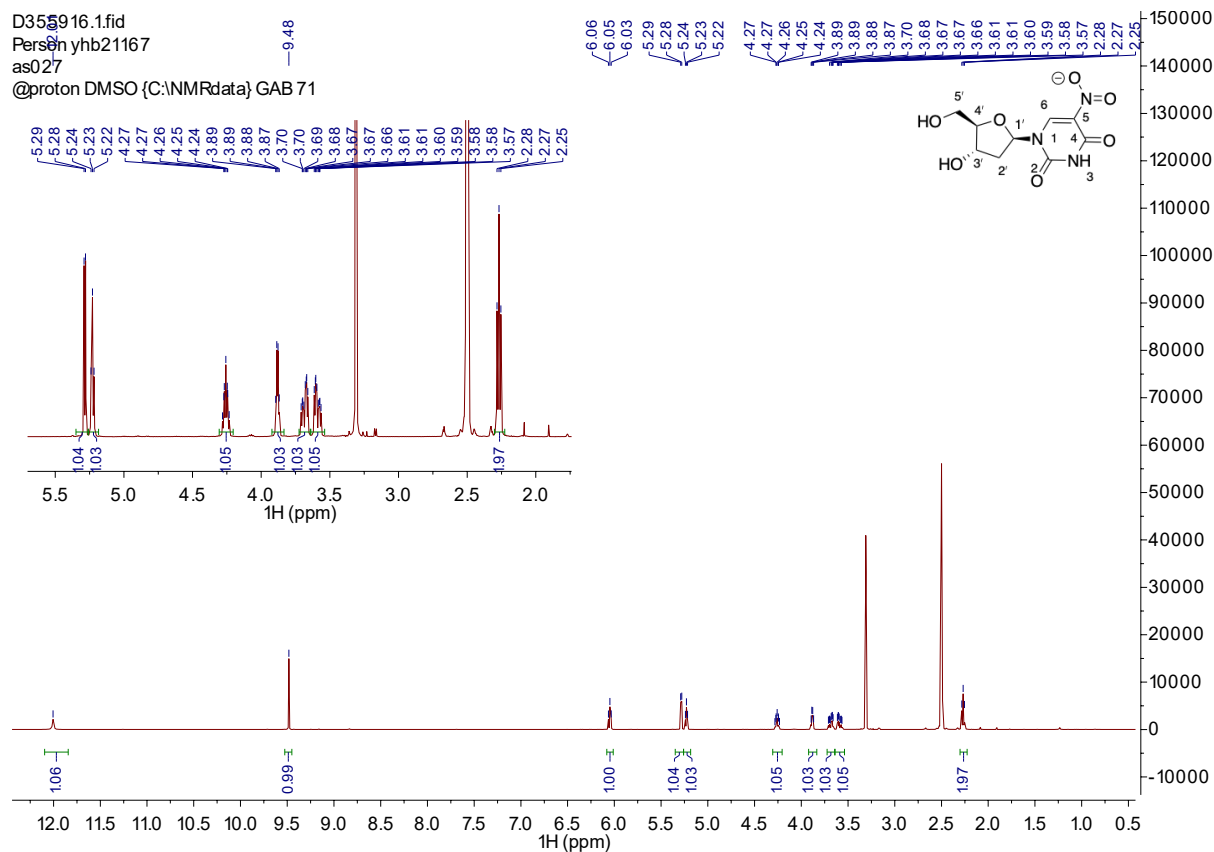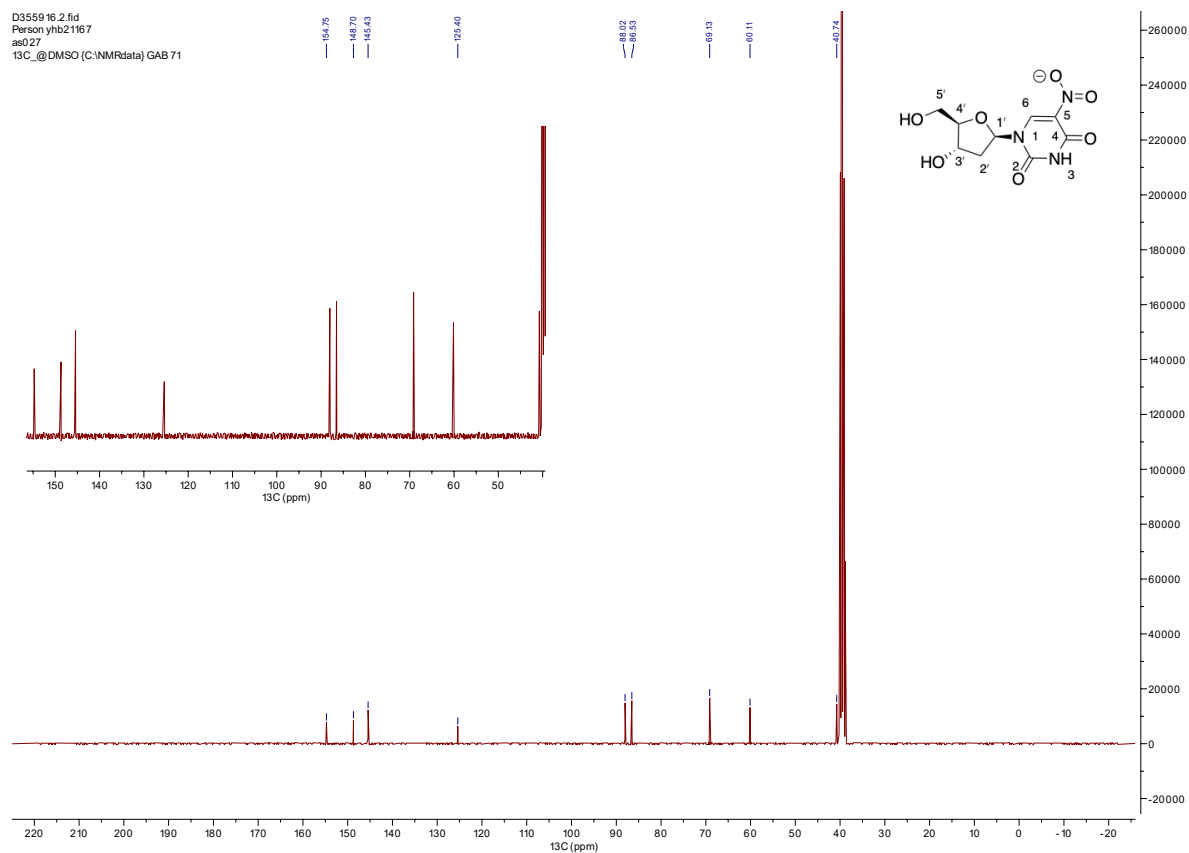

Sample Name : a1 rxn  
 Sample ID :  
 Data Filename : RXNS + STDS\_03022023\_005.lcd  
 Method Filename : Admir Trans glyco Run.lcm  
 Batch Filename : RXNS + STDS.lcb  
 Vial # : 1-19  
 Injection Volume : 10 uL  
 Date Acquired : 03/02/2023 11:58:50  
 Date Processed : 03/02/2023 12:10:11

Sample Type : Unknown  
 Acquired by : Shimadzu  
 Processed by : Shimadzu

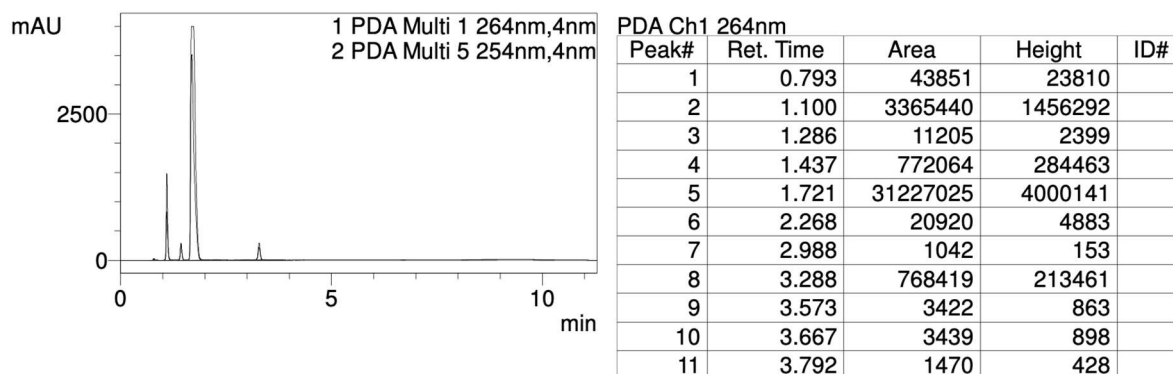

Figure S37 - HPLC trace for the reaction used to obtain nucleoside **20**. R.T = 1.1 = released nucleobase cytosine, 1.43 = nucleobase, 1.72 = nucleoside dC, 3.28 = nucleoside **20**

JRB\_AS027 #40-65 RT: 0.39-0.62 AV: 13 NL: 2.43E7

T: FTMS + p ESI Full ms [150.0000-2000.0000]

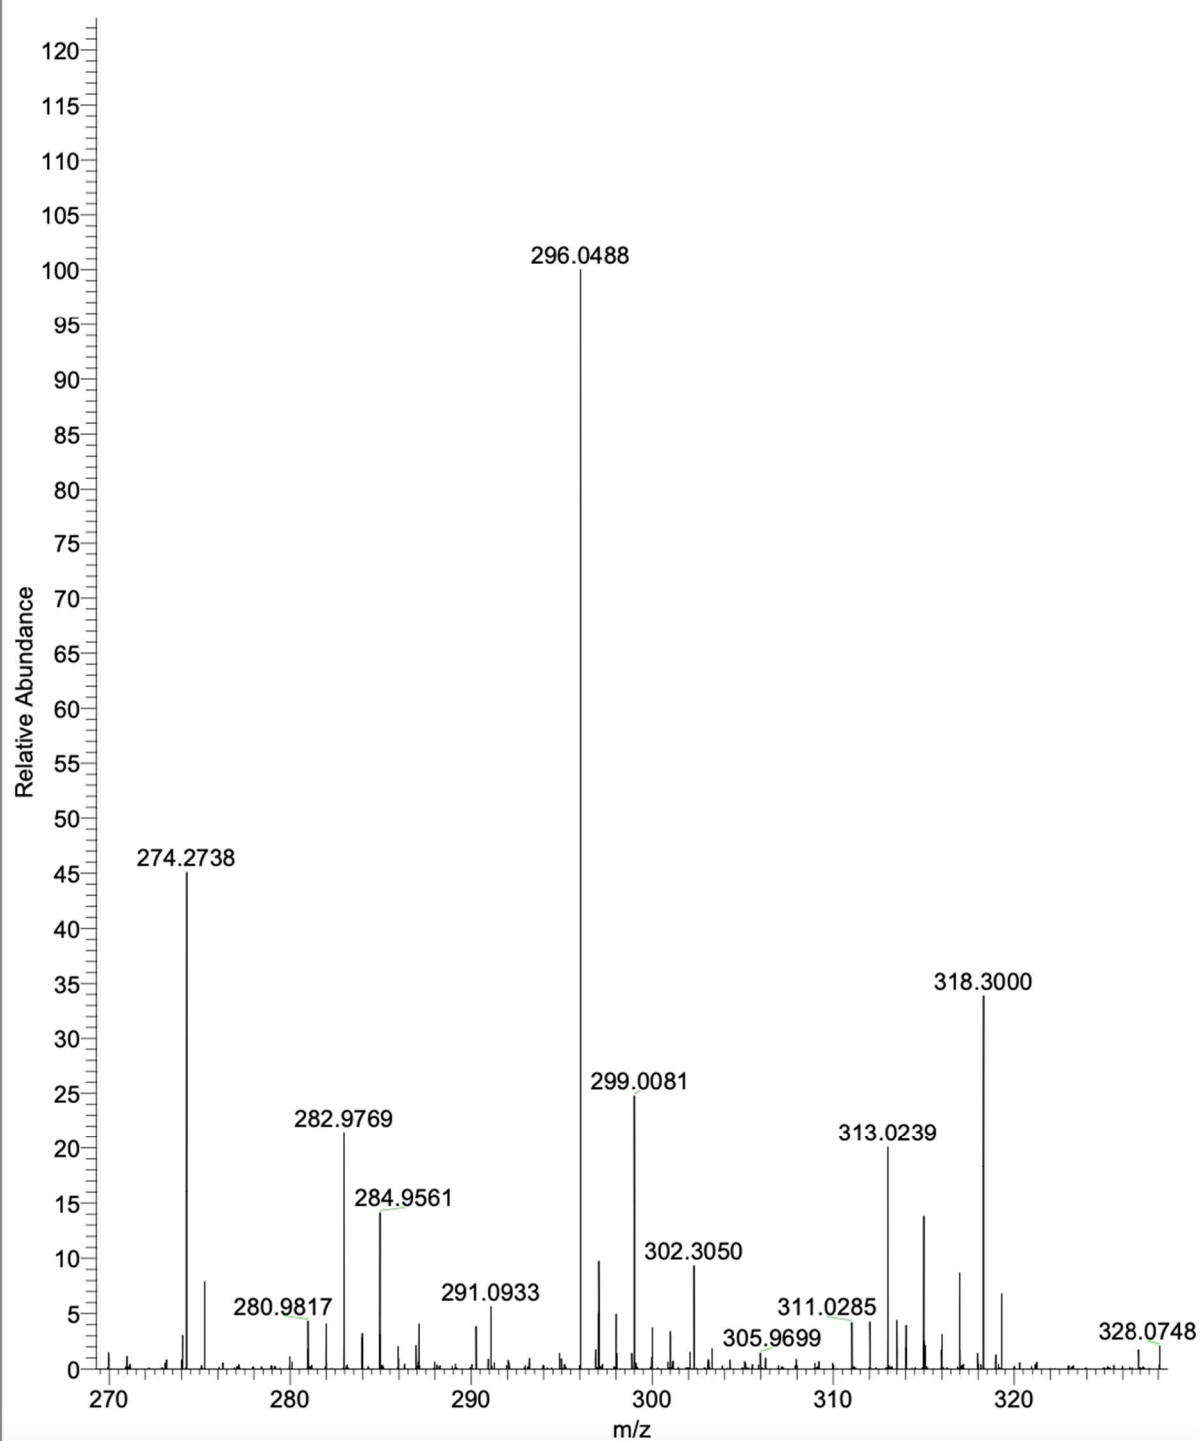

Figure S38 - HRMS for nucleoside 20

**2'-Deoxy-5-trifluorouridine (21)**



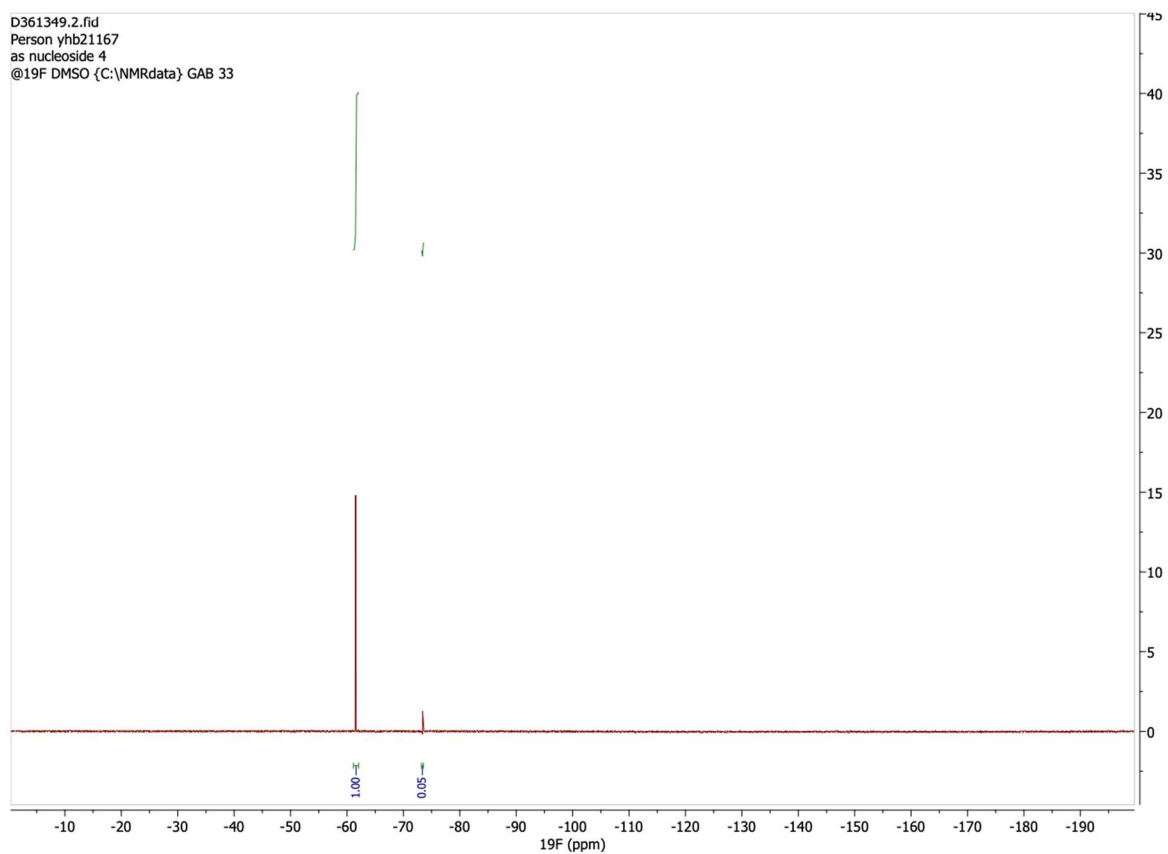

Figure S41 -  $^{19}\text{F}$  NMR spectra for nucleoside 21

Sample Name : 4 rxn  
Sample ID :  
Data Filename : rest of the rxns\_15062022\_008.lcd  
Method Filename : Admir Trans glyco Run.lcm  
Batch Filename : rest of the rxns.lcb  
Vial # : 1-18  
Injection Volume : 10 uL  
Date Acquired : 15/06/2022 15:50:38  
Date Processed : 15/06/2022 16:01:59

Sample Type : Unknown

Acquired by : Shimadzu  
Processed by : Shimadzu

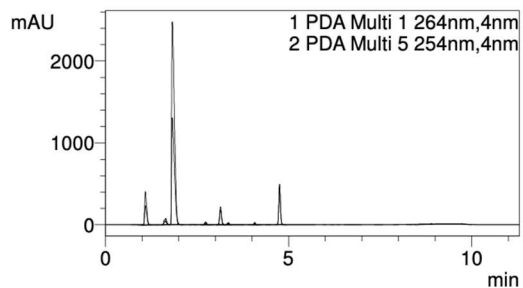

| Peak# | Ret. Time | Area     | Height  | ID# |
|-------|-----------|----------|---------|-----|
| 1     | 0.787     | 7400     | 2755    |     |
| 2     | 1.091     | 1561616  | 397981  |     |
| 3     | 1.299     | 13166    | 2562    |     |
| 4     | 1.648     | 358738   | 73850   |     |
| 5     | 1.829     | 12969229 | 2469692 |     |
| 6     | 2.382     | 24125    | 5950    |     |
| 7     | 2.733     | 129162   | 32877   |     |
| 8     | 3.143     | 638386   | 176476  |     |
| 9     | 3.357     | 101110   | 26751   |     |
| 10    | 3.495     | 4198     | 1245    |     |
| 11    | 3.640     | 1831     | 407     |     |
| 12    | 4.076     | 78410    | 29411   |     |
| 13    | 4.413     | 1477     | 322     |     |
| 14    | 4.755     | 1545418  | 487774  |     |
| 15    | 5.165     | 1686     | 315     |     |
| 16    | 5.329     | 1540     | 415     |     |
| 17    | 5.411     | 1423     | 347     |     |
| 18    | 5.635     | 1511     | 420     |     |
| 19    | 5.978     | 1204     | 544     |     |
| 20    | 6.175     | 1900     | 577     |     |
| 21    | 6.347     | 1289     | 397     |     |
| 22    | 6.554     | 1684     | 670     |     |
| 23    | 6.725     | 6932     | 2656    |     |
| 24    | 6.886     | 3337     | 623     |     |
| 25    | 7.519     | 1010     | 233     |     |
| 26    | 7.908     | 1541     | 641     |     |
| 27    | 8.256     | 7609     | 3341    |     |
| 28    | 8.327     | 2488     | 883     |     |
| 29    | 8.469     | 2005     | 730     |     |
| 30    | 8.595     | 4710     | 807     |     |
| 31    | 8.696     | 7133     | 1125    |     |
| 32    | 8.896     | 2094     | 684     |     |
| 33    | 9.809     | 10482    | 1543    |     |
| Total |           | 17495844 | 3725004 |     |

Figure S42 - HPLC trace of the reaction to obtain nucleoside 21. R.T = 1.1 = nucleobase cytosine, 1.6 = nucleoside dC, 4.76 = nucleoside 21

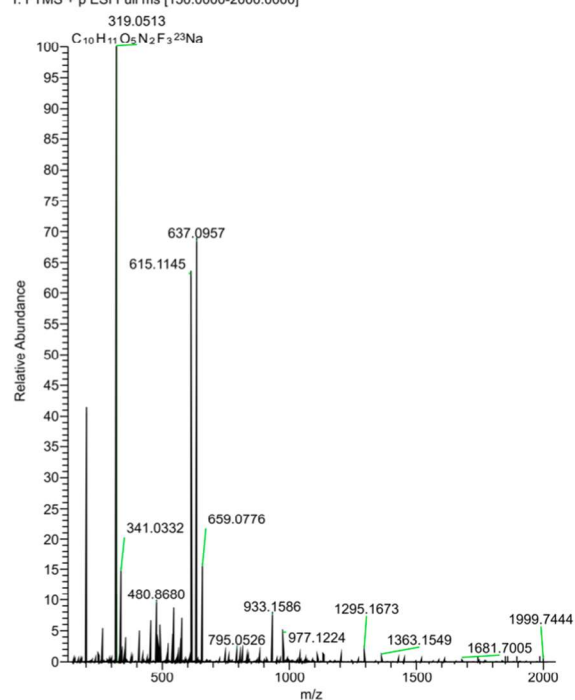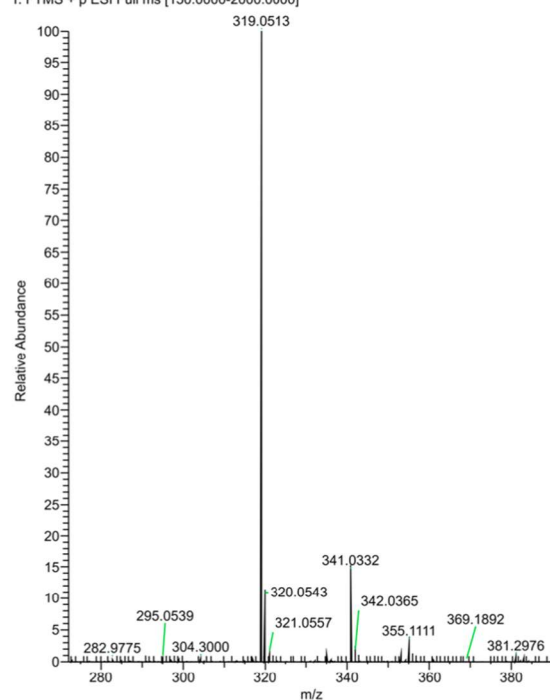

| Peak Mass | Display For...                                                                                | S Fit                | RDB  | Delta [ppm] | Theo. mass | Rank | Combined S... | # Matched I... | # Missed Iso. | MS Cov. [%] | Pattern Cov.... | MSMS Matc... |
|-----------|-----------------------------------------------------------------------------------------------|----------------------|------|-------------|------------|------|---------------|----------------|---------------|-------------|-----------------|--------------|
| 319.0513  | C <sub>10</sub> H <sub>11</sub> O <sub>5</sub> N <sub>2</sub> F <sub>3</sub> <sup>23</sup> Na | 72.40123496<br>52965 | 4.50 | 0.37        | 319.05123  | 1    | 98.38         | 4              | 0             | 99.82       | 100             | (Collection) |
| 319.0513  | C <sub>13</sub> H <sub>10</sub> O <sub>4</sub> N <sub>2</sub> F <sub>2</sub> <sup>23</sup> Na | 49.12337469<br>01087 | 8.50 | 3.96        | 319.05008  | 2    | 97.16         | 4              | 0             | 99.82       | 100             | (Collection) |

Figure S43 - HRMS spectra of the nucleoside 21

**2'-Deoxy-5-carboxyuridine (22)**

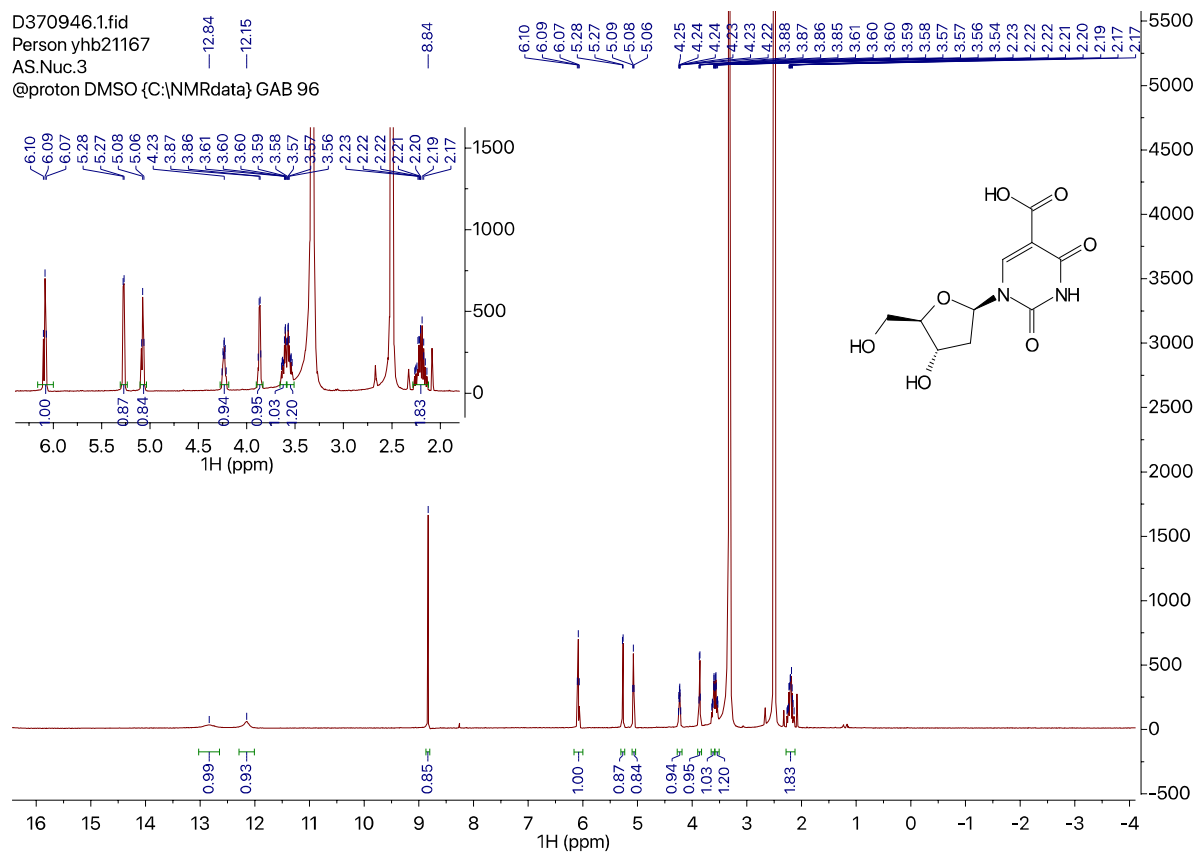

Figure S44 - <sup>1</sup>H NMR spectrum of Nucleoside 22

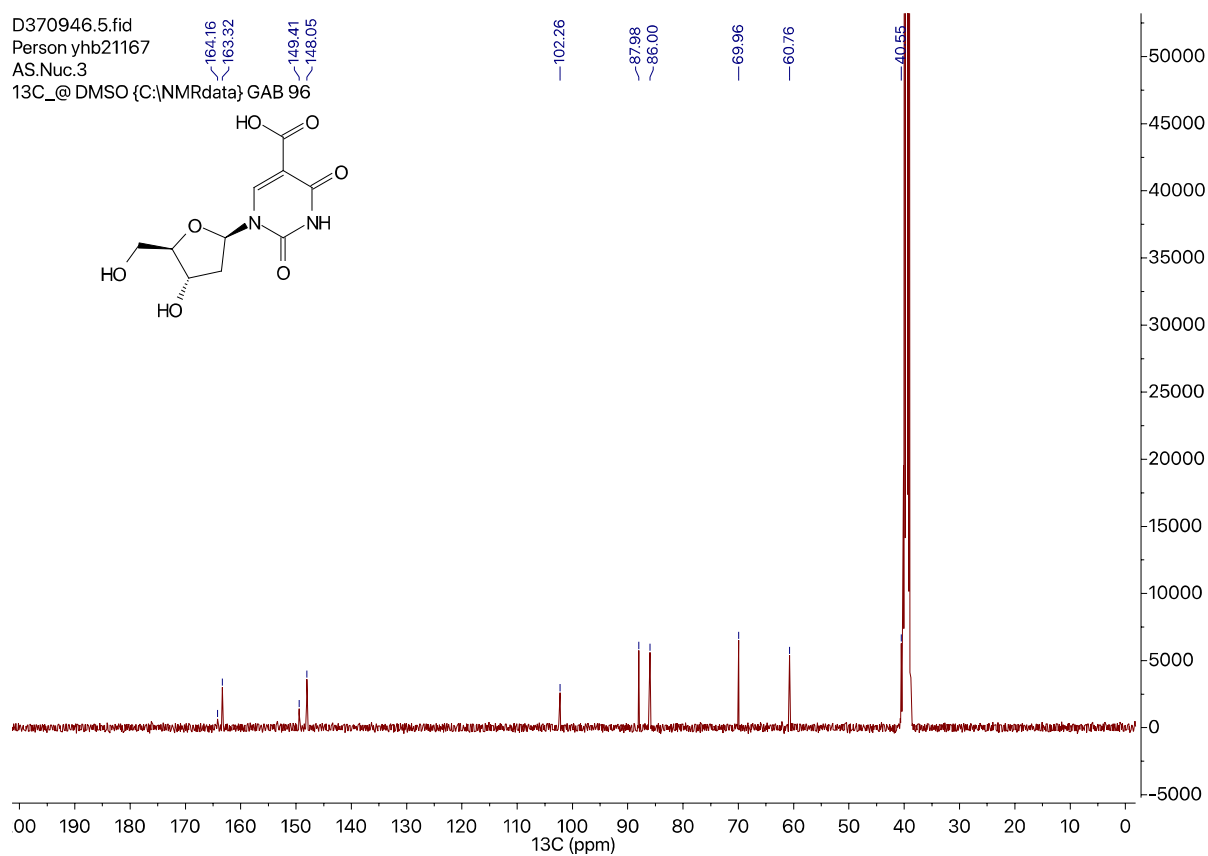

Figure S45 - <sup>13</sup>C NMR of Nucleoside 22



Sample Name : 3  
Sample ID :  
Data Filename : rest of rxns\_21062022\_012.lcd  
Method Filename : Admir Trans glyco Run.lcm  
Batch Filename : rest of rxns.lcb  
Vial # : 1-27  
Injection Volume : 10 uL  
Date Acquired : 21/06/2022 21:59:58  
Date Processed : 21/06/2022 22:11:19

Sample Type : Unknown  
Acquired by : Shimadzu  
Processed by : Shimadzu

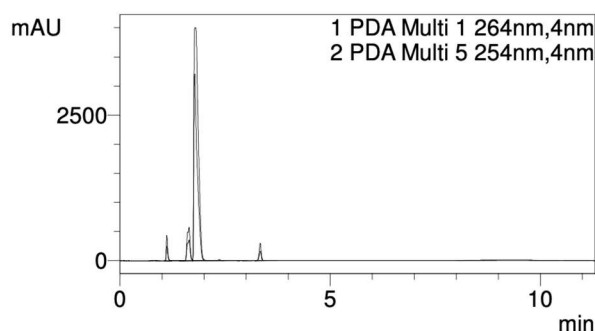

| Peak# | Ret. Time | Area     | Height  | ID# |
|-------|-----------|----------|---------|-----|
| 1     | 0.801     | 6268     | 2225    |     |
| 2     | 0.885     | 1073     | 436     |     |
| 3     | 1.116     | 997568   | 427625  |     |
| 4     | 1.305     | 12191    | 1715    |     |
| 5     | 1.645     | 2809996  | 569637  |     |
| 6     | 1.793     | 29333782 | 4000097 |     |
| 7     | 2.365     | 53923    | 14259   |     |
| 8     | 3.339     | 997625   | 297370  |     |
| 9     | 3.627     | 2646     | 984     |     |
| 10    | 8.252     | 11717    | 2031    |     |
| 11    | 8.323     | 7906     | 1731    |     |
| 12    | 8.462     | 9791     | 1375    |     |

Figure S46 - HPLC spectrum of Nucleoside 22. R.t of 1.1 min = cytosine released, 1.79 min = dC, 3.339 min = Nucleoside 22, 1.645 min = nucleobase starting material.

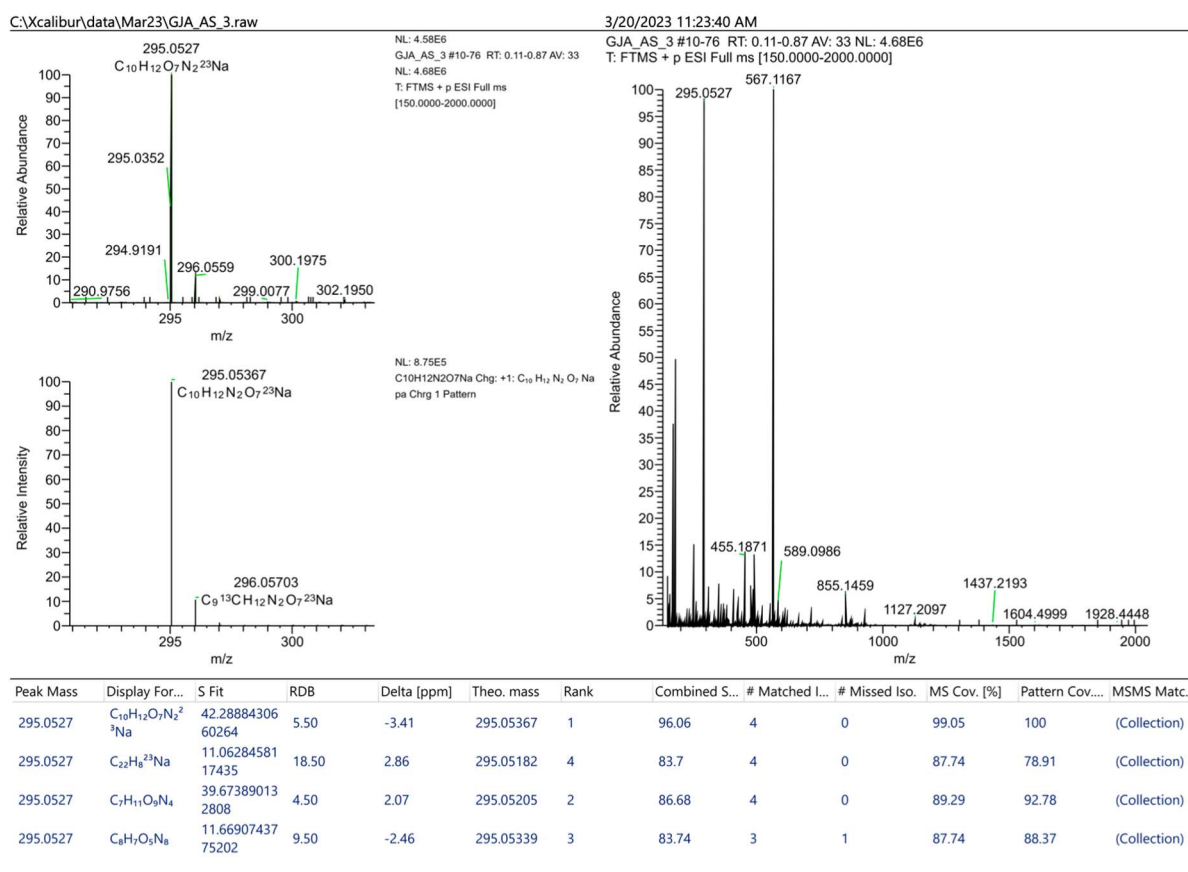

Figure S47- HRMS spectrum of Nucleoside 22

### 3-((2*R*,4*S*,5*R*)-4-hydroxy-5-(hydroxymethyl)tetrahydrofuran-2-yl)pyrimidin-4(1*H*)-one (23).

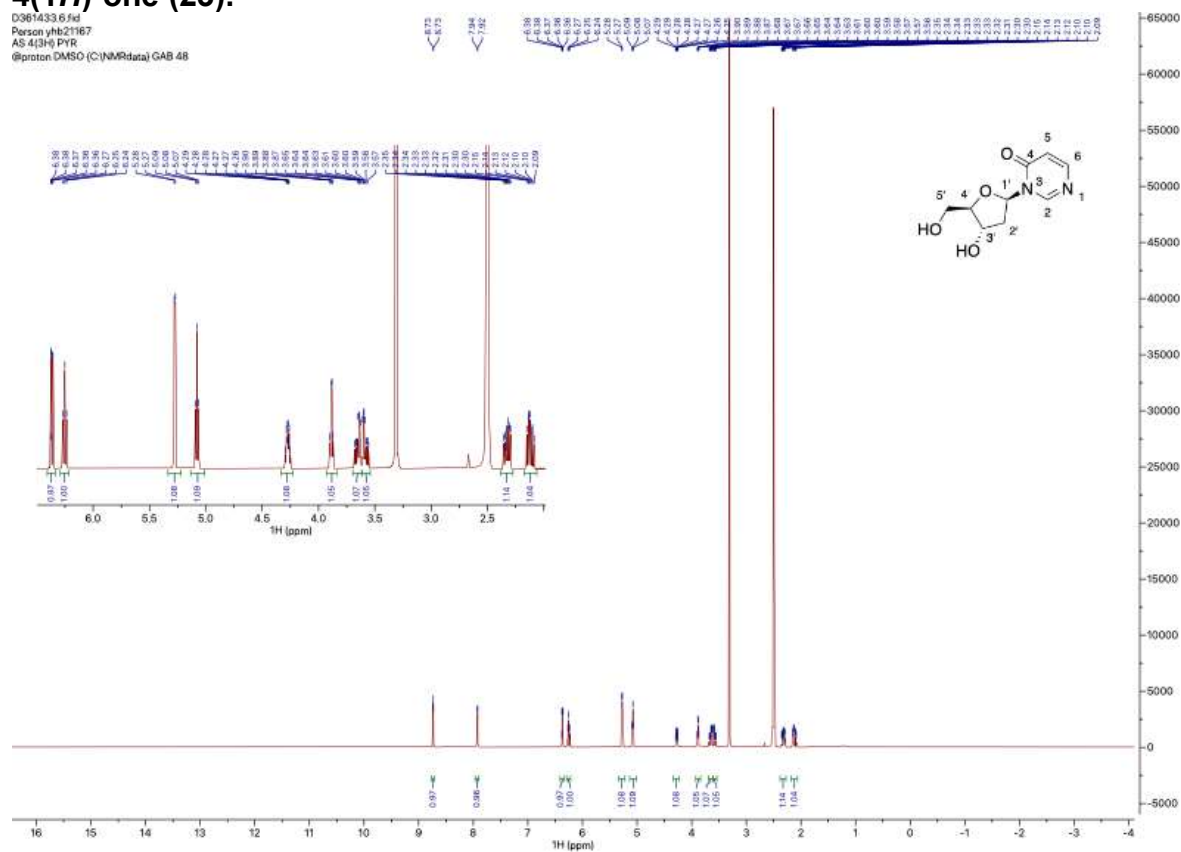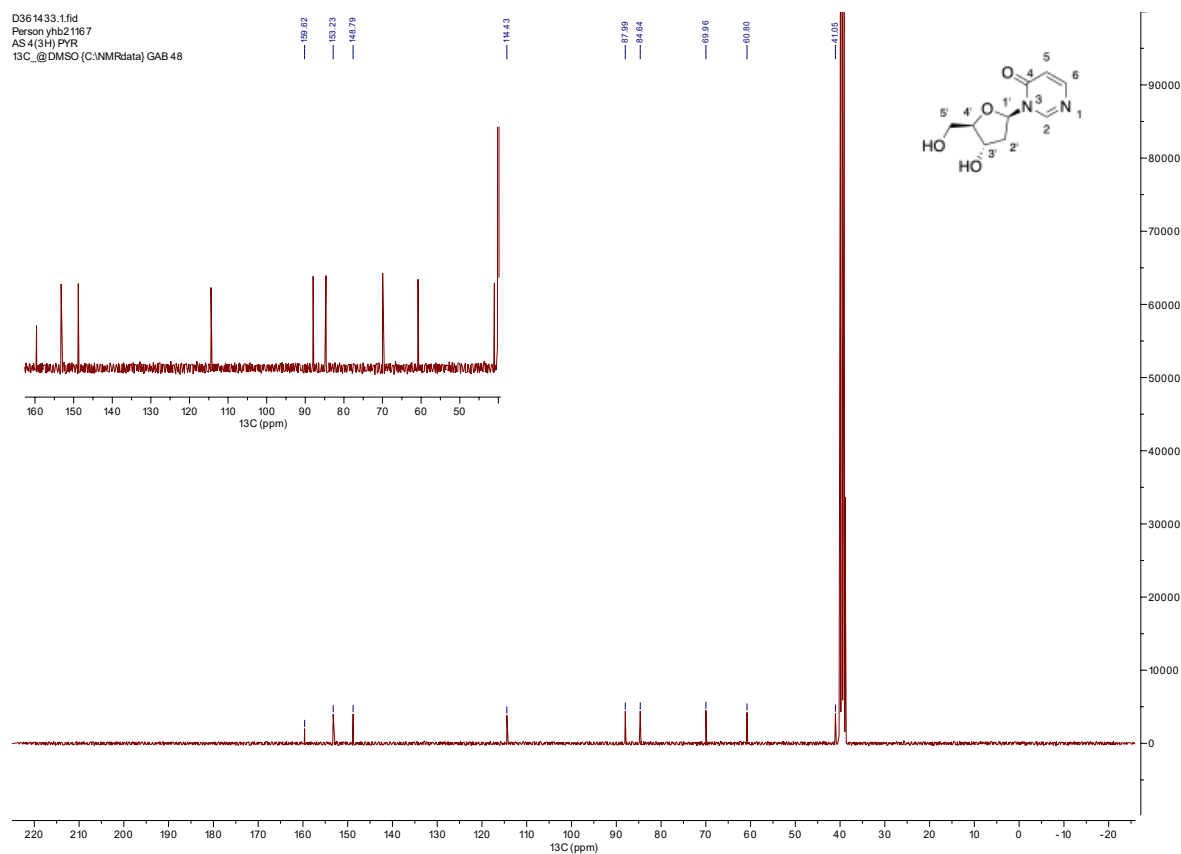

Sample Name : 4 PYRIMIDINONE RXN  
Sample ID :  
Data Filename : RXNS AND STDS\_22042022\_020.lcd  
Method Filename : Admir Trans glyco Run.lcm  
Batch Filename : RXNS AND STDS.lcb  
Vial # : 1-80  
Injection Volume : 10 uL  
Date Acquired : 22/04/2022 14:40:03  
Date Processed : 22/04/2022 14:51:24

Sample Type : Unknown  
Acquired by : Shimadzu  
Processed by : Shimadzu

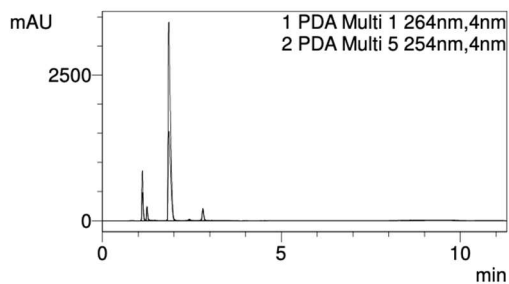

| Peak# | Ret. Time | Area     | Height  | ID# |
|-------|-----------|----------|---------|-----|
| 1     | 0.784     | 7989     | 2884    |     |
| 2     | 1.119     | 1972913  | 838866  |     |
| 3     | 1.249     | 522358   | 201293  |     |
| 4     | 1.382     | 3489     | 1704    |     |
| 5     | 1.463     | 3431     | 1652    |     |
| 6     | 1.856     | 15384031 | 3361927 |     |
| 7     | 2.434     | 82037    | 23463   |     |
| 8     | 2.811     | 684939   | 206266  |     |
| 9     | 3.063     | 14910    | 4115    |     |
| 10    | 3.264     | 12284    | 790     |     |
| 11    | 3.617     | 5927     | 2466    |     |
| 12    | 8.184     | 2046     | 246     |     |
| 13    | 8.352     | 1385     | 620     |     |
| 14    | 8.622     | 6414     | 857     |     |
| 15    | 8.719     | 3901     | 1038    |     |
| 16    | 8.776     | 3660     | 784     |     |
| 17    | 8.933     | 1657     | 410     |     |
| 18    | 9.834     | 18151    | 2815    |     |
| 19    | 10.670    | 14929    | 608     |     |
| Total |           | 18746450 | 4652803 |     |

| Peak# | Ret. Time | Area    | Height  | ID# |
|-------|-----------|---------|---------|-----|
| 1     | 1.119     | 1125290 | 477253  |     |
| 2     | 1.249     | 545285  | 225850  |     |
| 3     | 1.858     | 7414817 | 1511895 |     |
| 4     | 2.434     | 74241   | 21752   |     |
| 5     | 2.811     | 573732  | 175084  |     |
| Total |           | 9733365 | 2411834 |     |

Figure S50 - HPLC trace of the reaction used to obtain Nucleoside 23. R.T = 1.2 = nucleobase cytosine, 1.25 = nucleobase x, 1.86 = nucleoside dC, 2.81= Nucleoside 23

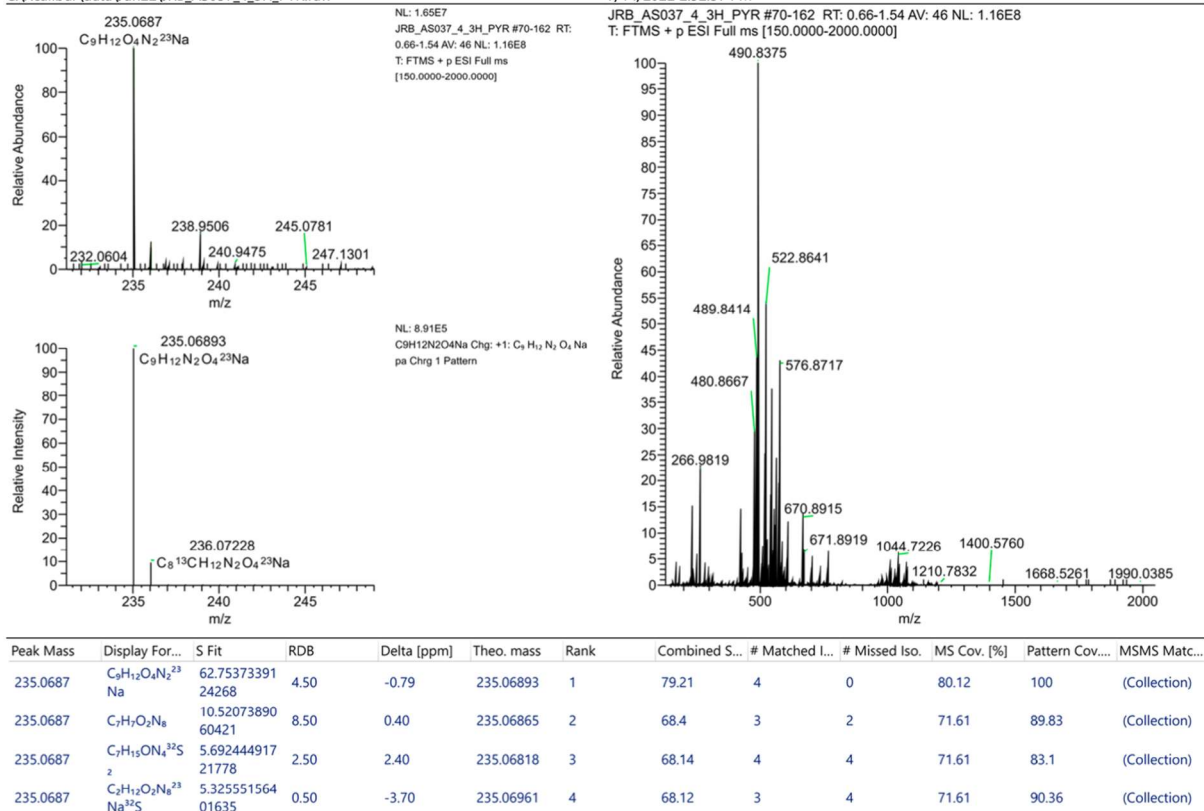

Figure S51 - HRMS of Nucleoside 23 sodium adduct.

## 2'-Deoxy-*N*-3-methyluridine (24)

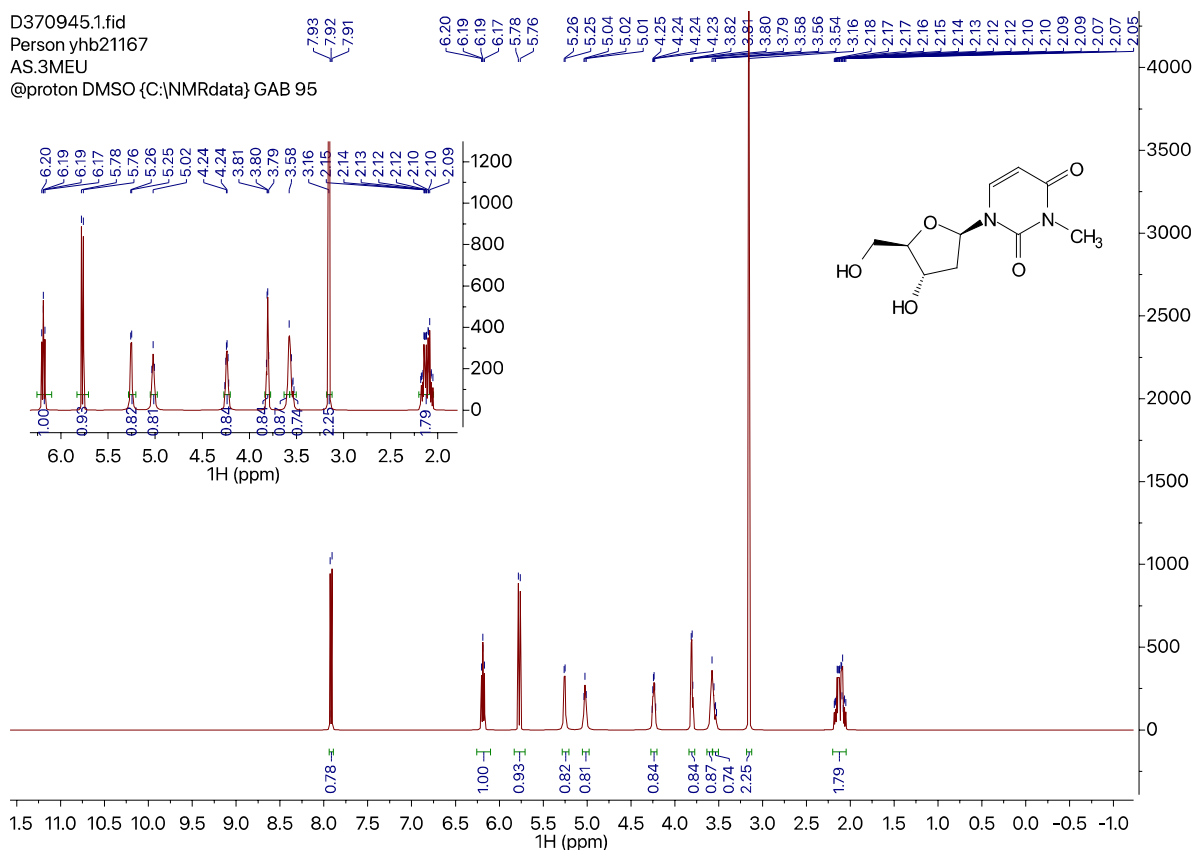

Figure S52 -  $^1\text{H}$  NMR spectra of nucleoside 24

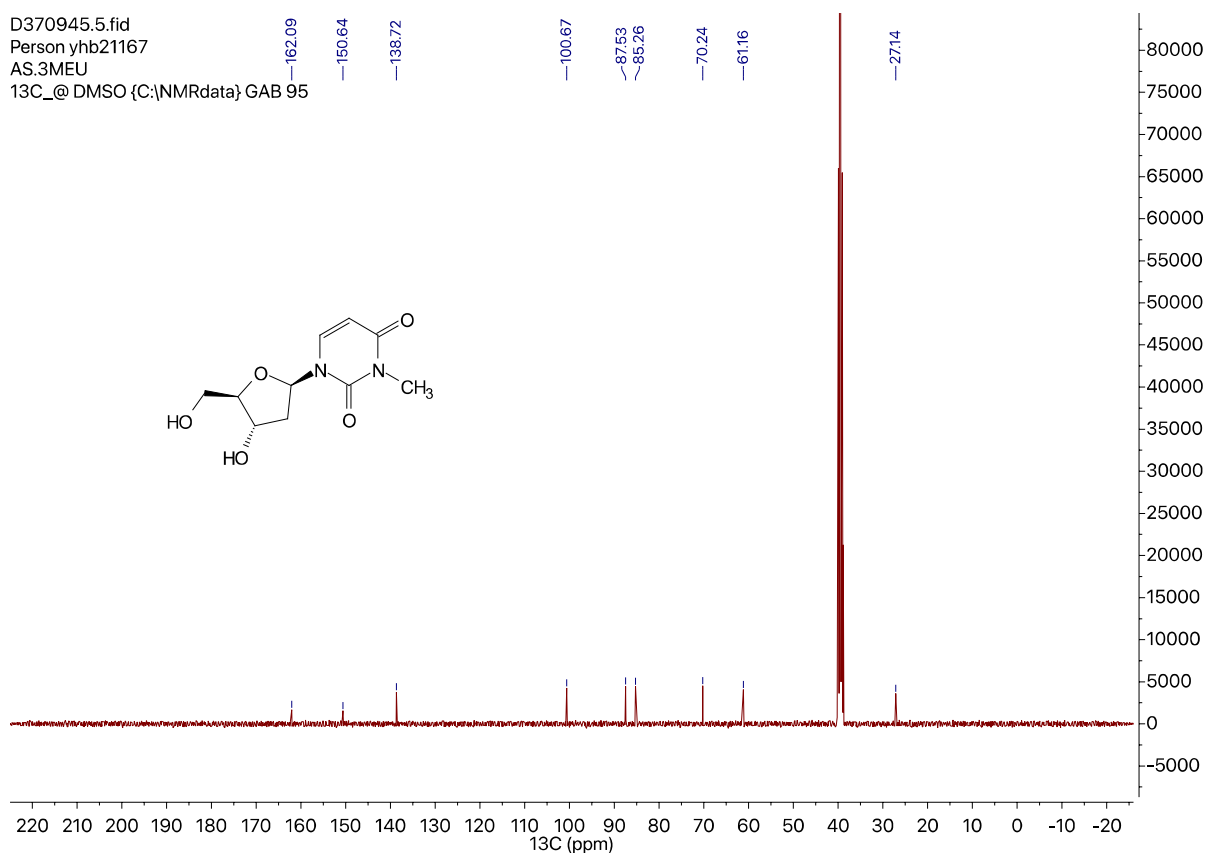

Figure S53 -  $^{13}\text{C}$  NMR spectra of nucleoside 24

Sample Name : 1.4c 3meu  
Sample ID :  
Data Filename : 1.;4c\_12102022\_001.lcd  
Method Filename : Admir Trans glyco Run.lcm  
Batch Filename : 1.;4c.lcb  
Vial # : 1-4  
Injection Volume : 10 uL  
Date Acquired : 12/10/2022 11:41:51  
Date Processed : 12/10/2022 11:53:12

Sample Type : Unknown  
Acquired by : Shimadzu  
Processed by : Shimadzu

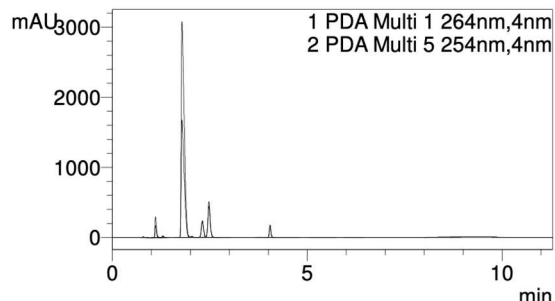

| Peak# | Ret. Time | Area     | Height  | ID# |
|-------|-----------|----------|---------|-----|
| 1     | 0.795     | 23069    | 11990   |     |
| 2     | 1.109     | 765781   | 291807  |     |
| 3     | 1.296     | 63683    | 21959   |     |
| 4     | 1.789     | 16583029 | 3069034 |     |
| 5     | 2.040     | 41034    | 13461   |     |
| 6     | 2.311     | 916751   | 232495  |     |
| 7     | 2.479     | 1862804  | 444172  |     |
| 8     | 3.781     | 18588    | 5604    |     |
| 9     | 4.048     | 513801   | 173697  |     |
| 10    | 4.448     | 1459     | 145     |     |
| 11    | 4.665     | 2842     | 231     |     |
| 12    | 5.234     | 3687     | 465     |     |
| 13    | 5.375     | 3029     | 282     |     |
| 14    | 5.698     | 1476     | 412     |     |
| 15    | 5.987     | 1722     | 496     |     |

Figure S54 - HPLC spectra of nucleoside 24. R.T = cytosine released = 1.1min, dC = 1.78 min, nucleobase starting material r.t = 2.48 min, product nucleoside 24 r.t = 4.05 min

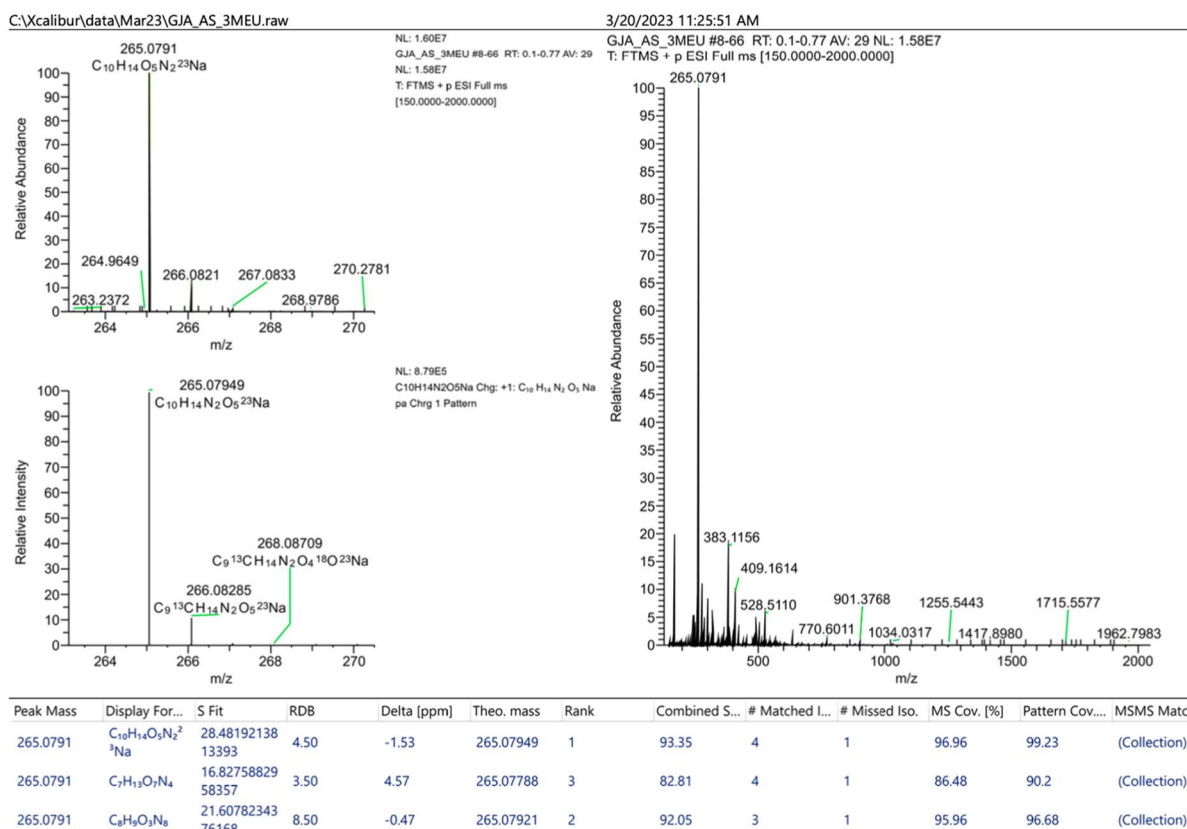

Figure S55 - HRMS of nucleoside 24

D379664.1.fid  
Person yhb21167  
AS.5FC  
@proton DMSO {C:\NMRdata} GAB 92

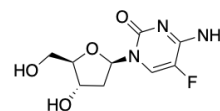

D379664.fid  
Person yhl21167  
AS.5FC  
13C @DMSO {C:\NMR\data} GAB 92

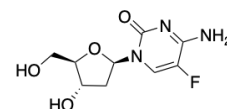

S83

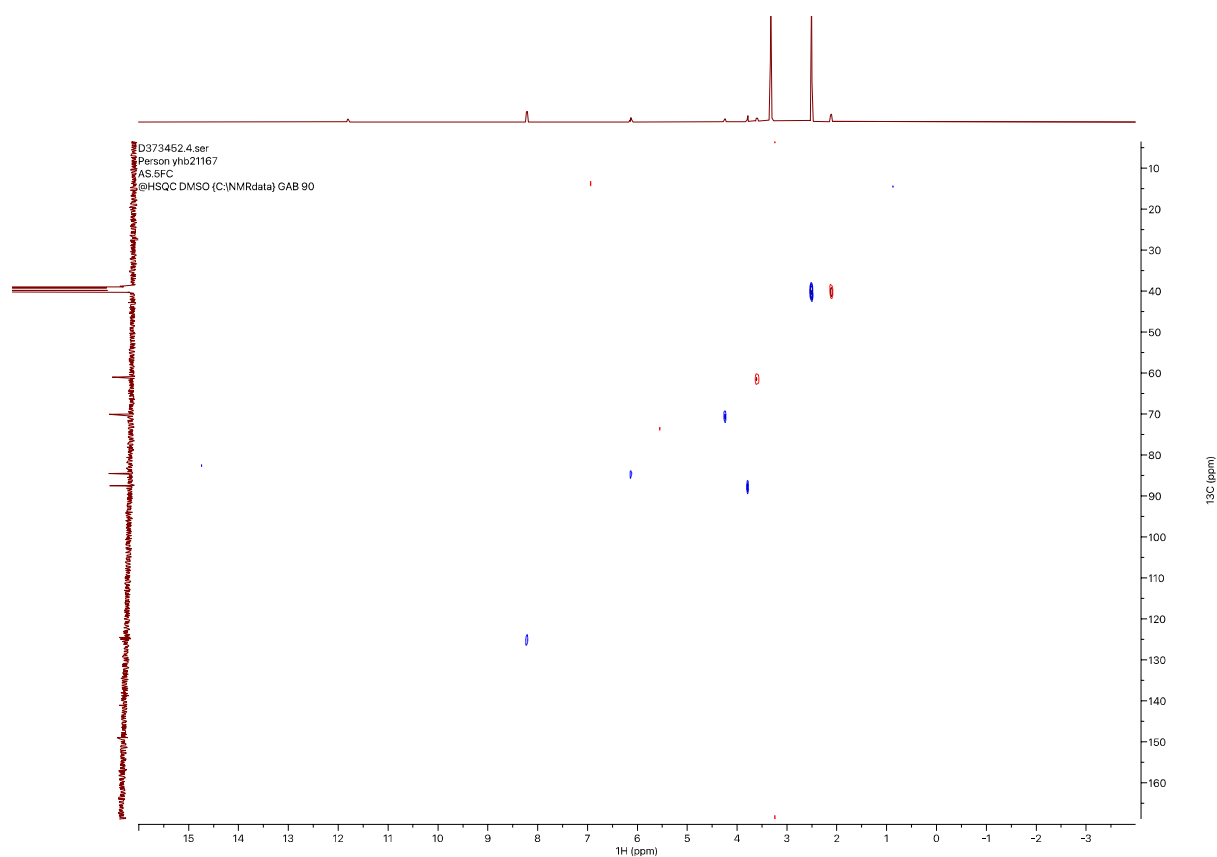

Figure S58 - HSQC NMR of Nucleoside 25

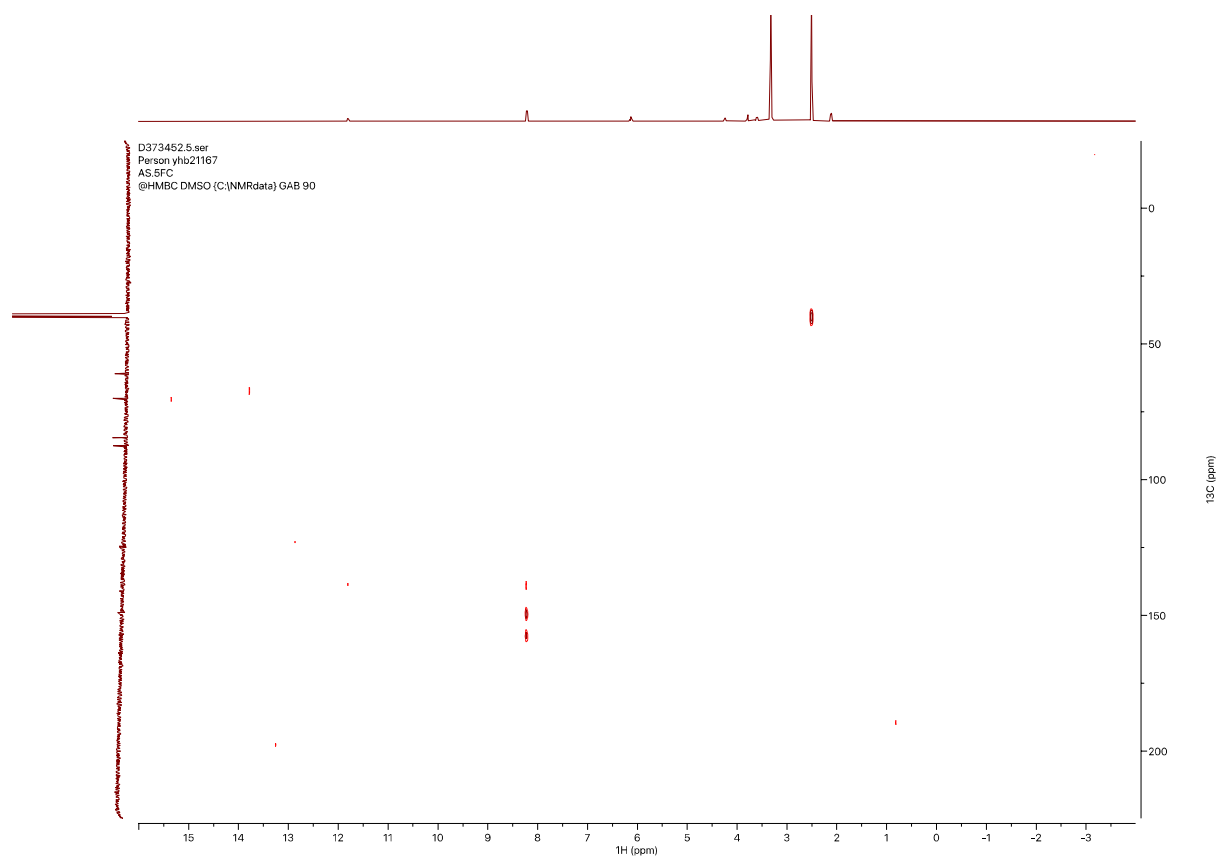

Figure S59 - HMBC NMR of Nucleoside 25



D379664.2.fid  
Person yhb21167  
AS.5FC  
@19F DMSO {C:\NMRdata} GAB 92

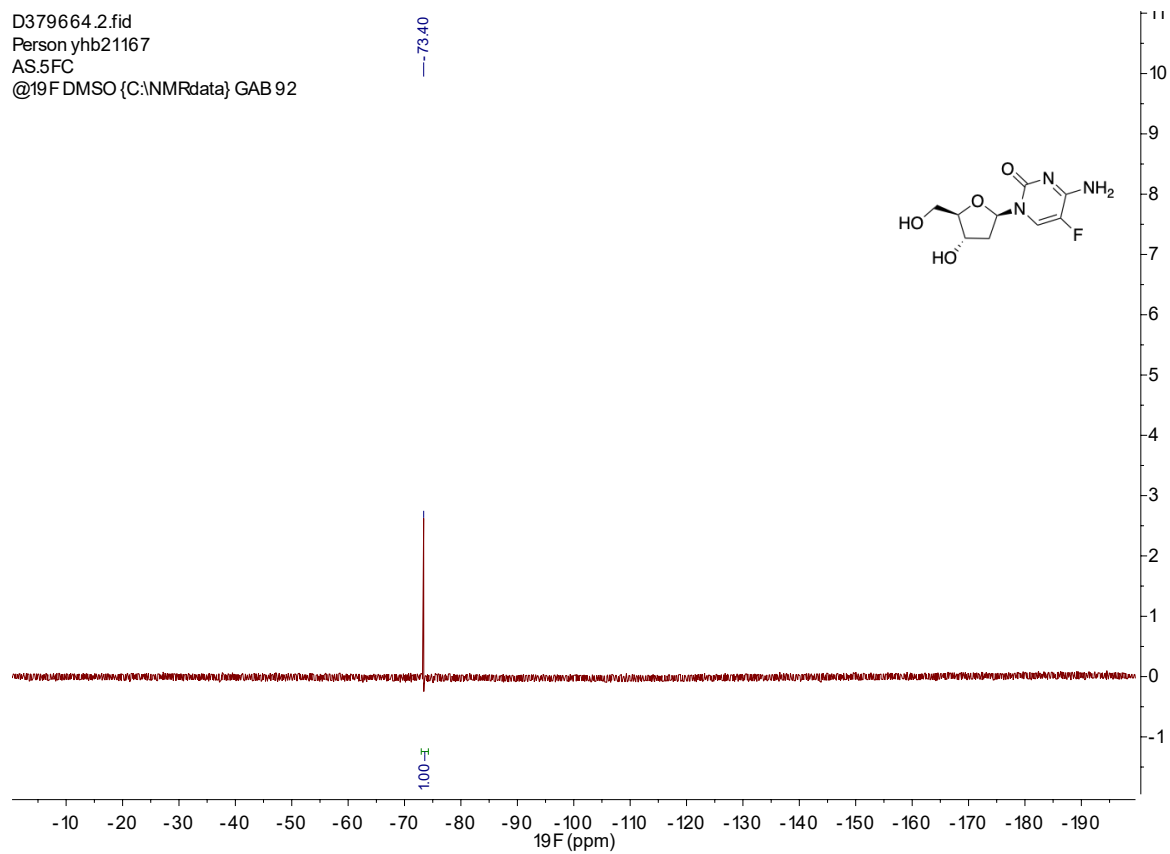

Figure S60 -  $^{19}\text{F}$  NMR of Nucleoside 25

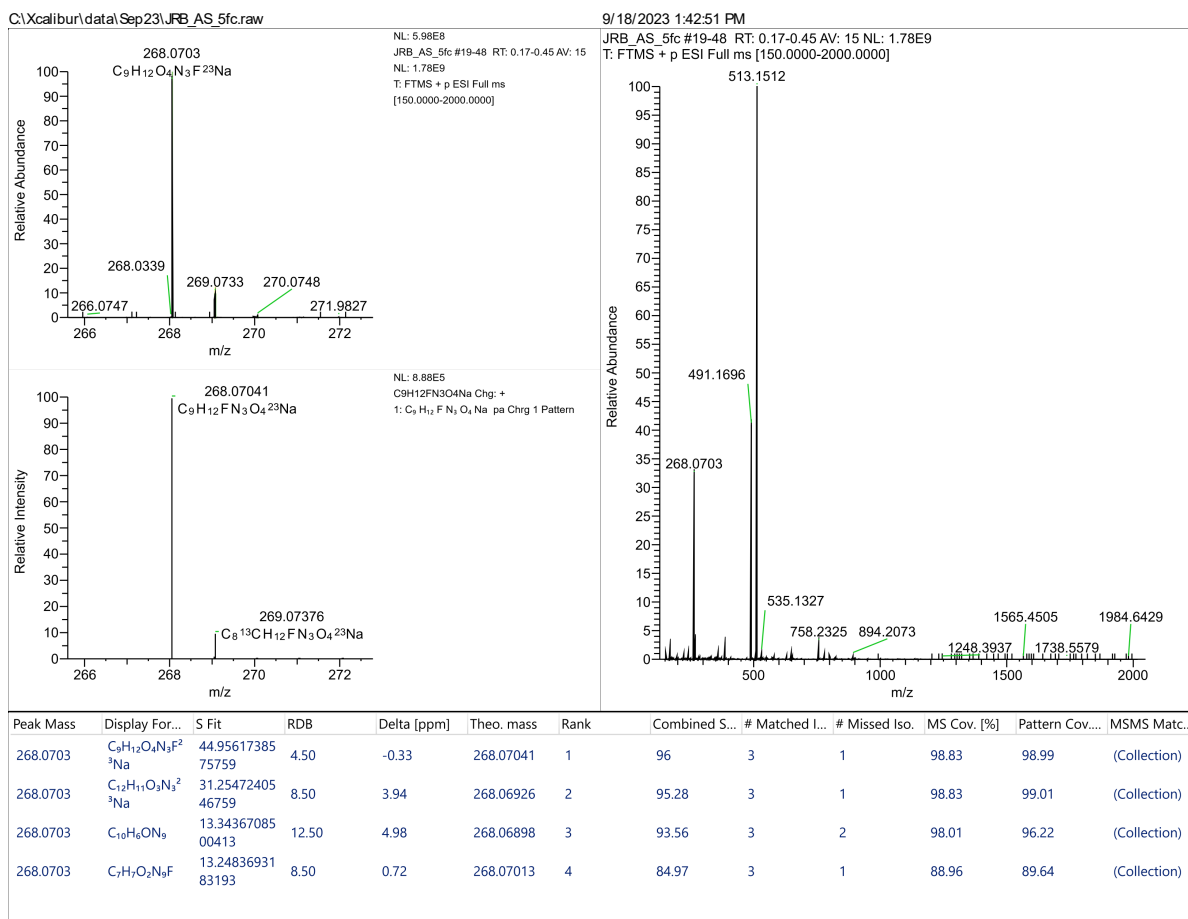

Figure S61 - HRMS of Nucleoside 25

## 2'-Deoxy-2-thiocytidine (26)

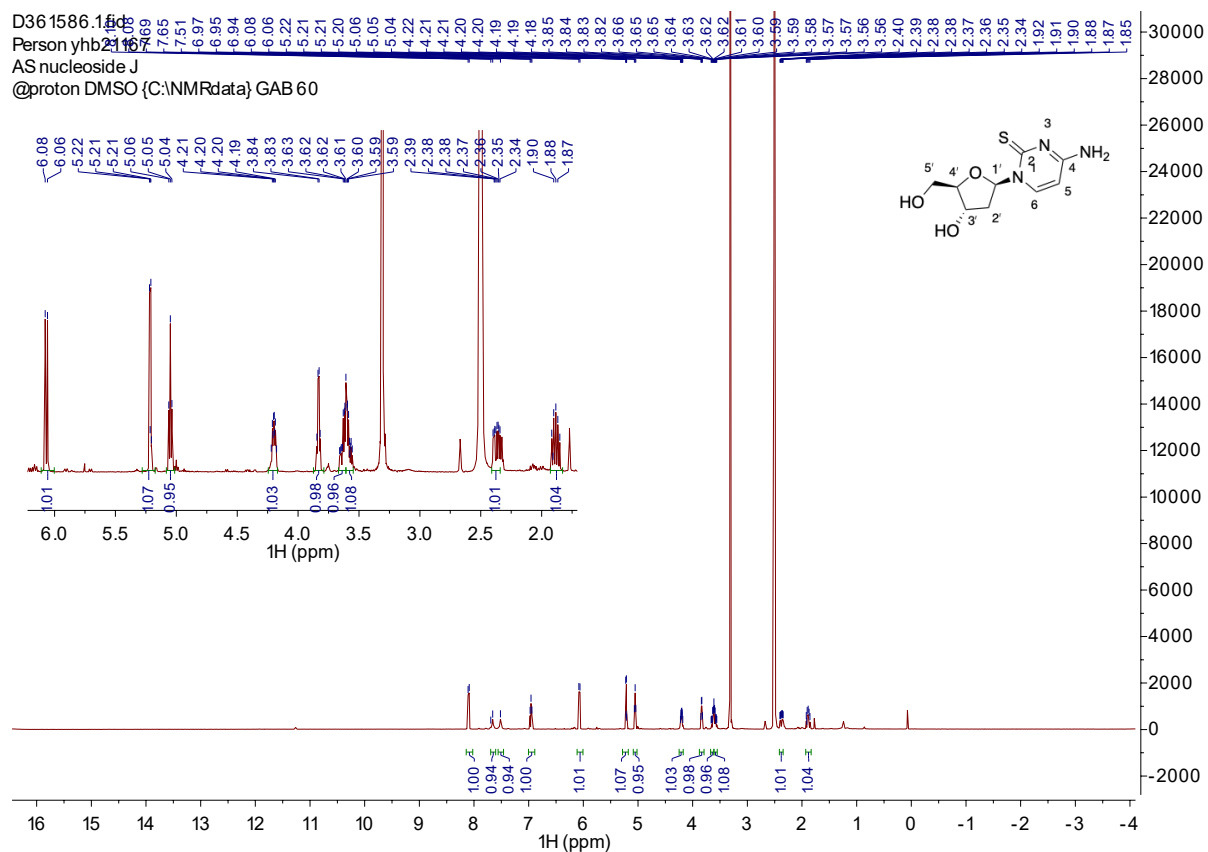

Figure S62 -  $^1\text{H}$  NMR spectra of nucleoside 26

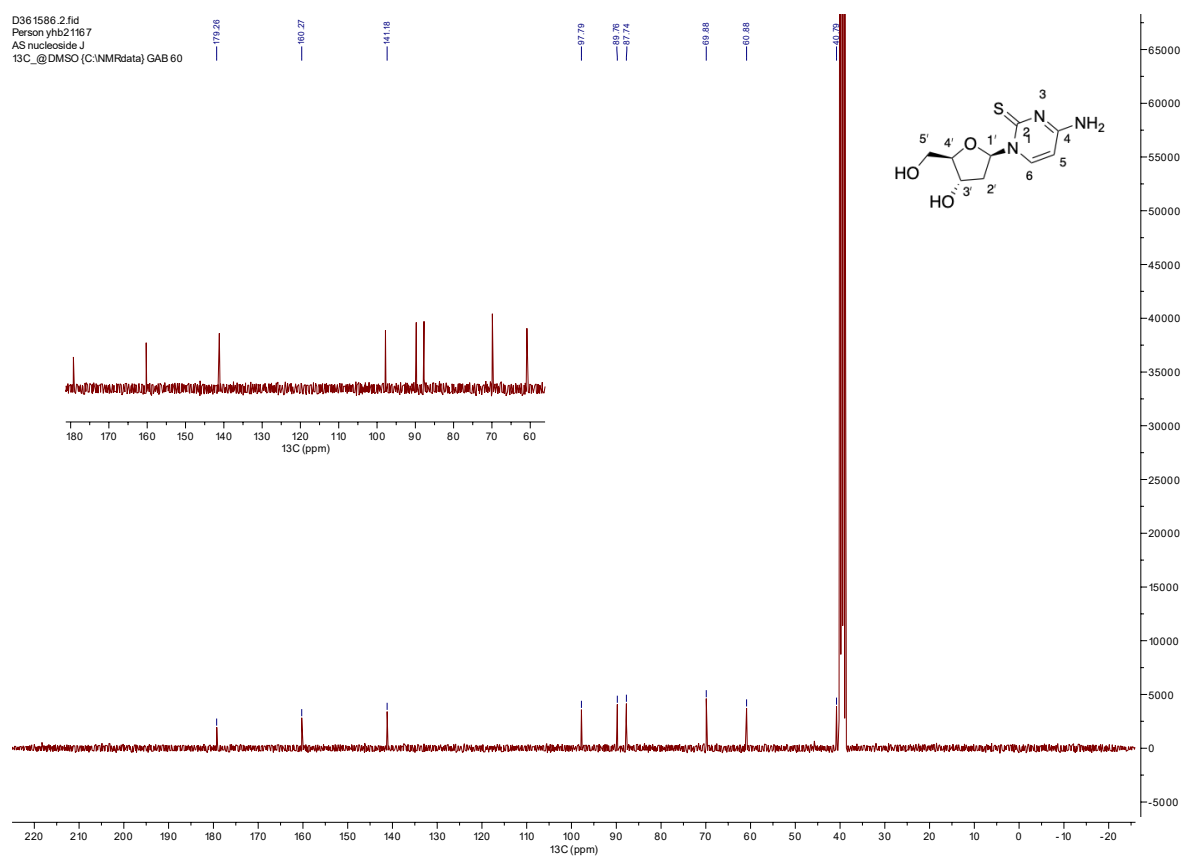

Figure S63 -  $^{13}\text{C}\{^1\text{H}\}$ -NMR spectra of nucleoside 26

Sample Name : J  
Sample ID :  
Data Filename : RXNS\_15062022\_018.lcd  
Method Filename : Admir Trans glyco Run.lcm  
Batch Filename : RXNS.lcb  
Vial # : 1-78  
Injection Volume : 10 uL  
Date Acquired : 15/06/2022 22:19:55  
Date Processed : 15/06/2022 22:31:16

Sample Type : Unknown  
Acquired by : Shimadzu  
Processed by : Shimadzu

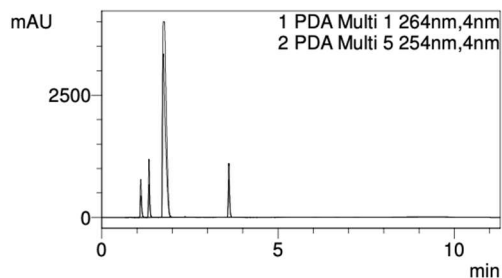

| Peak# | Ret. Time | Area     | Height  | ID# |
|-------|-----------|----------|---------|-----|
| 1     | 0.784     | 5282     | 2134    |     |
| 2     | 1.109     | 1916986  | 769980  |     |
| 3     | 1.343     | 2751862  | 1169326 |     |
| 4     | 1.761     | 29410270 | 3999974 |     |
| 5     | 2.367     | 37554    | 11510   |     |
| 6     | 2.574     | 6928     | 1891    |     |
| 7     | 3.606     | 2890797  | 1097609 |     |
| 8     | 4.992     | 19077    | 4146    |     |
| 9     | 6.033     | 1909     | 589     |     |
| 10    | 6.648     | 1735     | 816     |     |
| 11    | 7.218     | 1126     | 440     |     |
| 12    | 8.260     | 3970     | 1638    |     |
| 13    | 8.333     | 1727     | 650     |     |
| 14    | 8.472     | 1814     | 610     |     |
| 15    | 8.600     | 5725     | 783     |     |
| 16    | 8.700     | 2965     | 982     |     |
| 17    | 8.752     | 3110     | 699     |     |
| 18    | 8.899     | 1673     | 477     |     |
| 19    | 9.813     | 10815    | 1551    |     |
| Total |           | 37075326 | 7065804 |     |

| Peak# | Ret. Time | Area     | Height  | ID# |
|-------|-----------|----------|---------|-----|
| 1     | 1.109     | 1098514  | 439959  |     |
| 2     | 1.343     | 1552086  | 657837  |     |
| 3     | 1.748     | 18657295 | 3332580 |     |
| 4     | 2.366     | 35491    | 10838   |     |
| 5     | 3.606     | 2010206  | 762680  |     |
| 6     | 4.992     | 25757    | 5984    |     |
| Total |           | 23379349 | 5209878 |     |

Figure S64 - HPLC trace of the reaction used to obtain nucleoside 26. R.T = 1.11 = nucleobase cytosine, 1.34 = nucleobase J, 1.76 = nucleoside dC, 3.61 = nucleoside 26

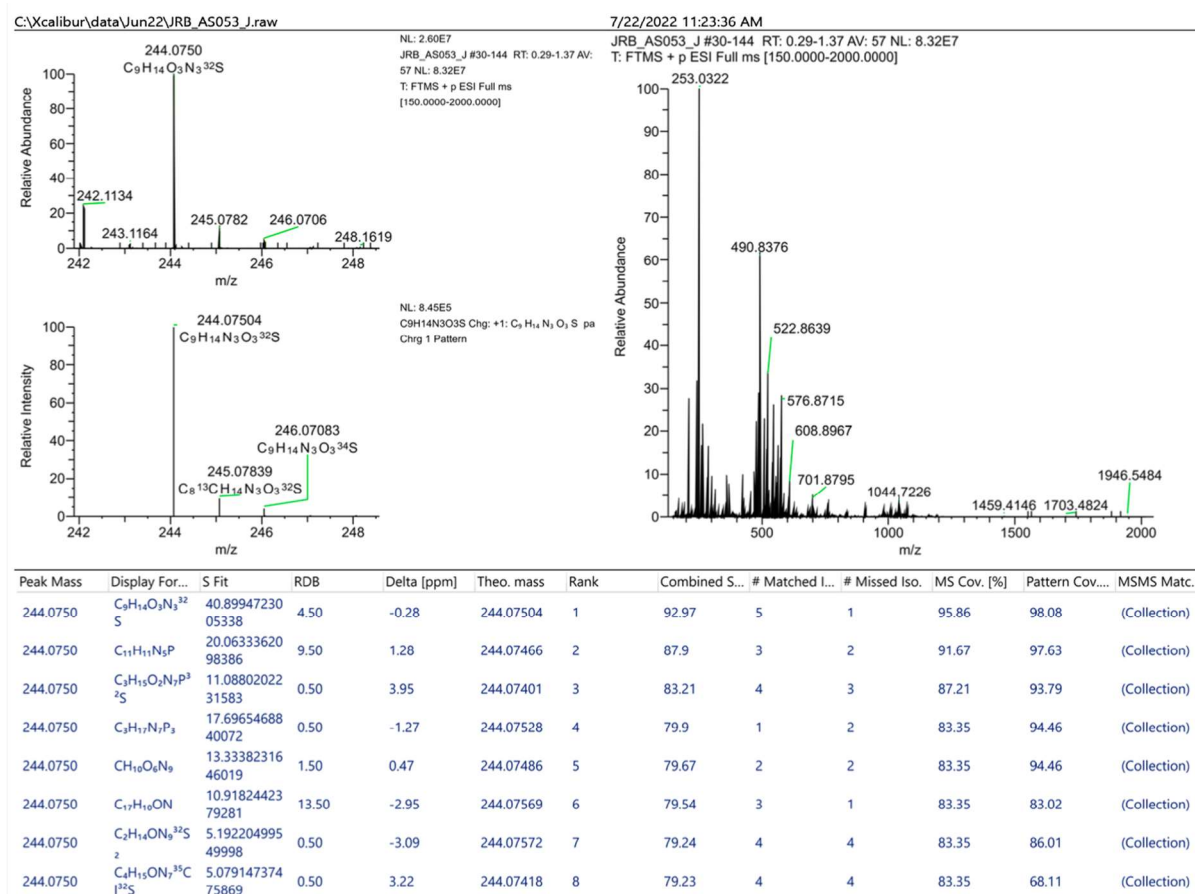

Figure S65 - HRMS of nucleoside 26

## 2'-Deoxy-4-hydroxyaminocytidine (27)

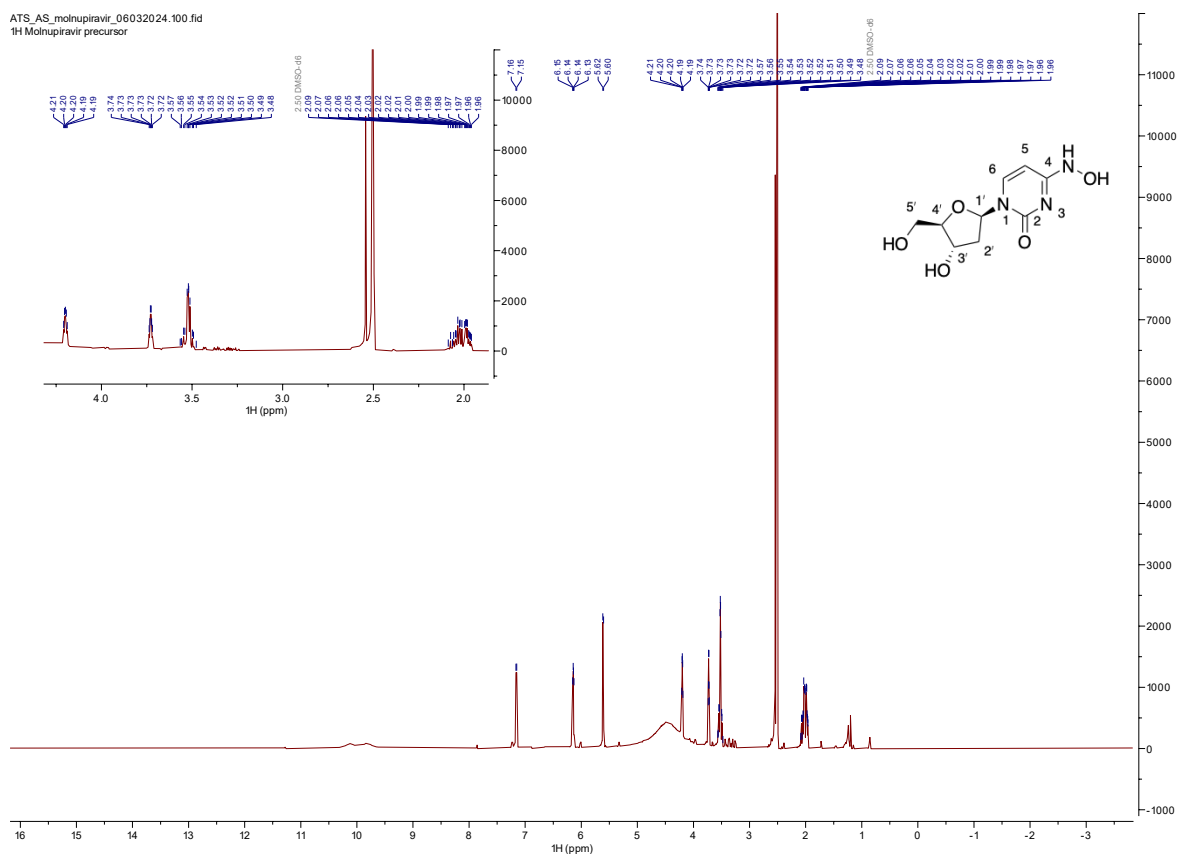

Figure S66 -  $^1\text{H}$  NMR spectra of nucleoside 27

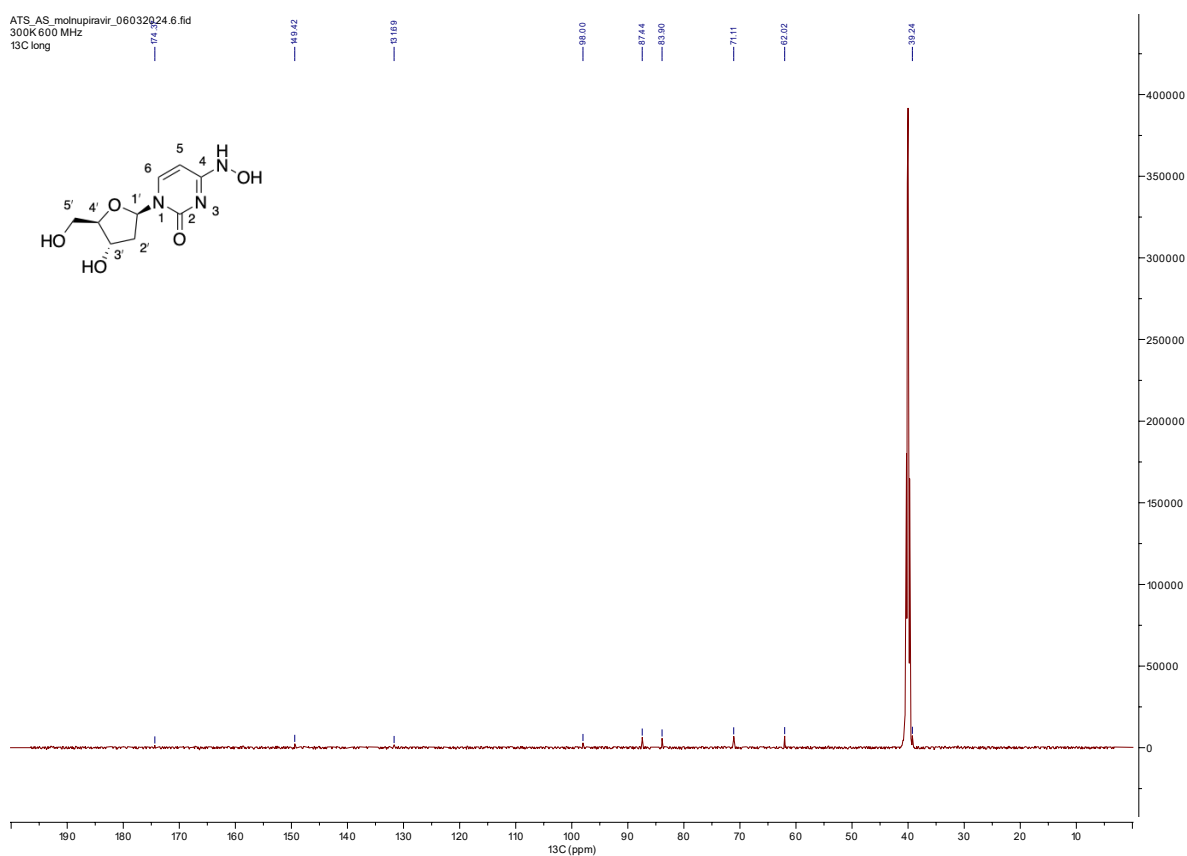

Figure S67 -  $^{13}\text{C}\{^1\text{H}\}$ -NMR spectra of nucleoside 27

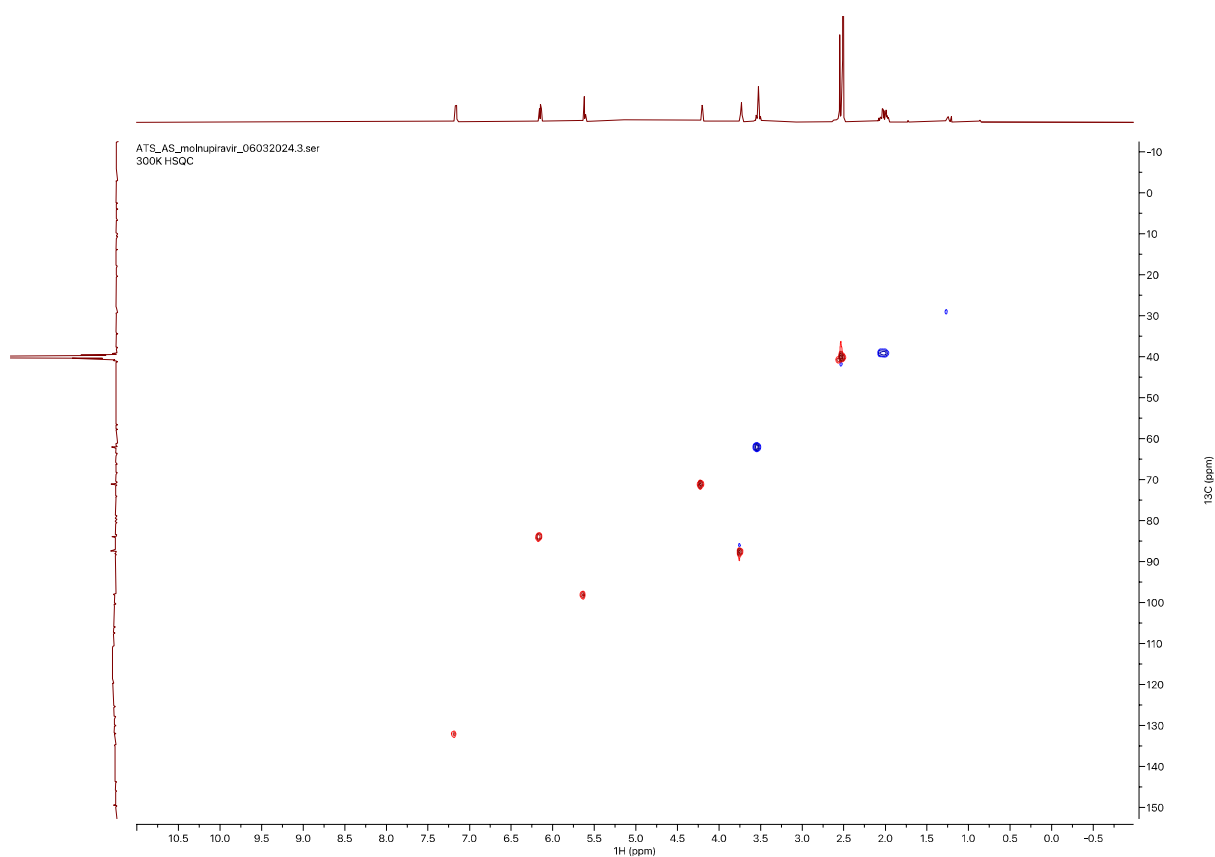

Figure S68 – HSQC NMR spectra of nucleoside 27

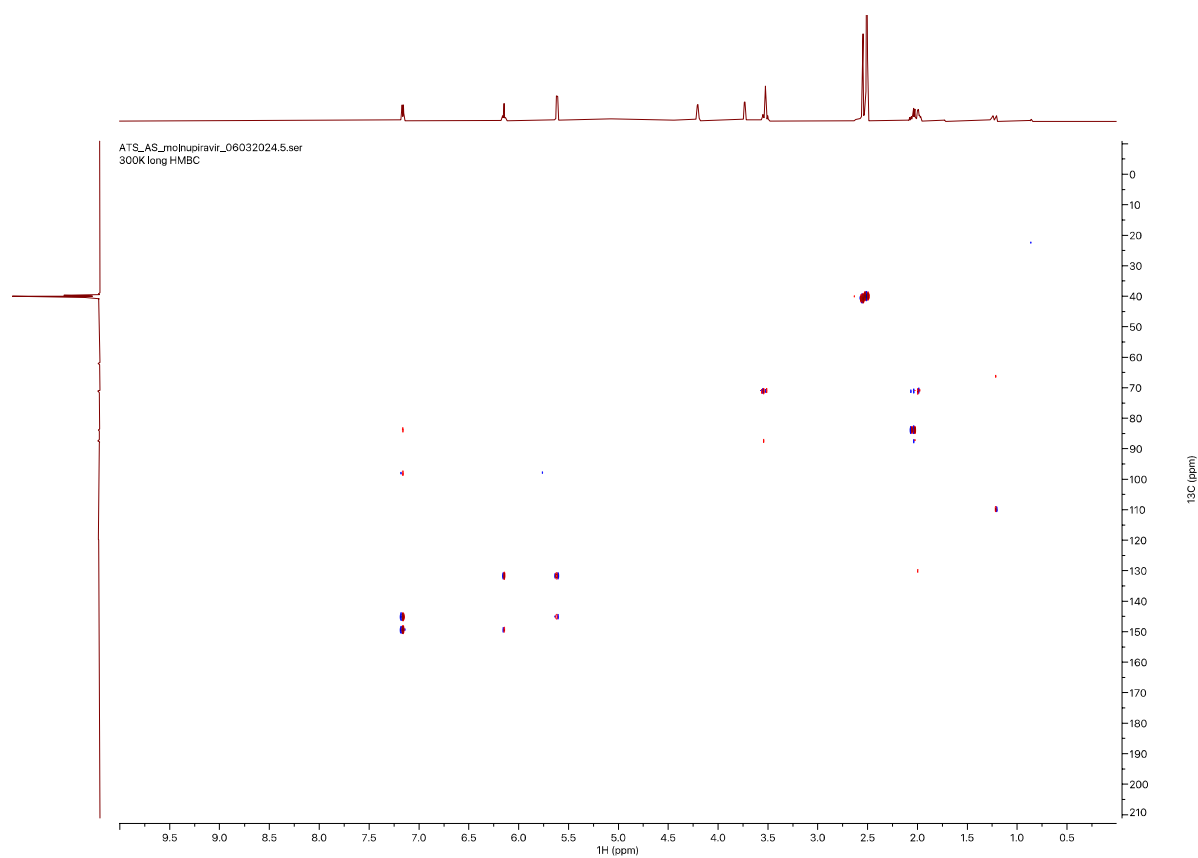

Figure S69 – HMBC NMR spectra of nucleoside 27

Sample Name : 1.4  
Sample ID :  
Data Filename : 1.4\_08092022\_003.lcd  
Method Filename : Admir Trans glyco Run.lcm  
Batch Filename : 1.4.lcb  
Vial # : 1-21  
Injection Volume : 10 uL  
Date Acquired : 08/09/2022 17:14:05  
Date Processed : 08/09/2022 17:25:26

Sample Type : Unknown

Acquired by : Shimadzu  
Processed by : Shimadzu

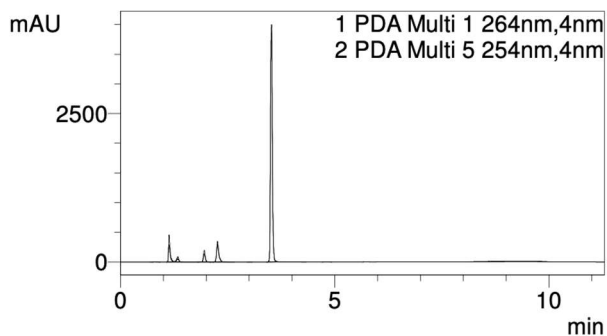

| Peak# | Ret. Time | Area     | Height  | ID# |
|-------|-----------|----------|---------|-----|
| 1     | 0.789     | 5648     | 2616    |     |
| 2     | 1.137     | 1229812  | 439020  |     |
| 3     | 1.340     | 305768   | 86342   |     |
| 4     | 1.957     | 576722   | 191071  |     |
| 5     | 2.267     | 1230115  | 343993  |     |
| 6     | 2.994     | 1055     | 280     |     |
| 7     | 3.523     | 12256196 | 3833717 |     |
| 8     | 4.805     | 2176     | 410     |     |
| 9     | 8.257     | 4008     | 785     |     |
| 10    | 8.336     | 1835     | 651     |     |
| 11    | 8.480     | 2593     | 541     |     |
| 12    | 8.599     | 4379     | 1057    |     |
| 13    | 8.694     | 4183     | 1430    |     |
| 14    | 8.752     | 4239     | 1069    |     |
| 15    | 8.898     | 2083     | 586     |     |
| 16    | 9.807     | 11844    | 2214    |     |
| Total |           | 15642656 | 4905780 |     |

Figure S70 - HPLC trace of the reaction used to obtain nucleoside 27. R.T = 1.13min = nucleobase, 1.95 = nucleoside 27, 2.26 = thymine, 3.52 = dT.

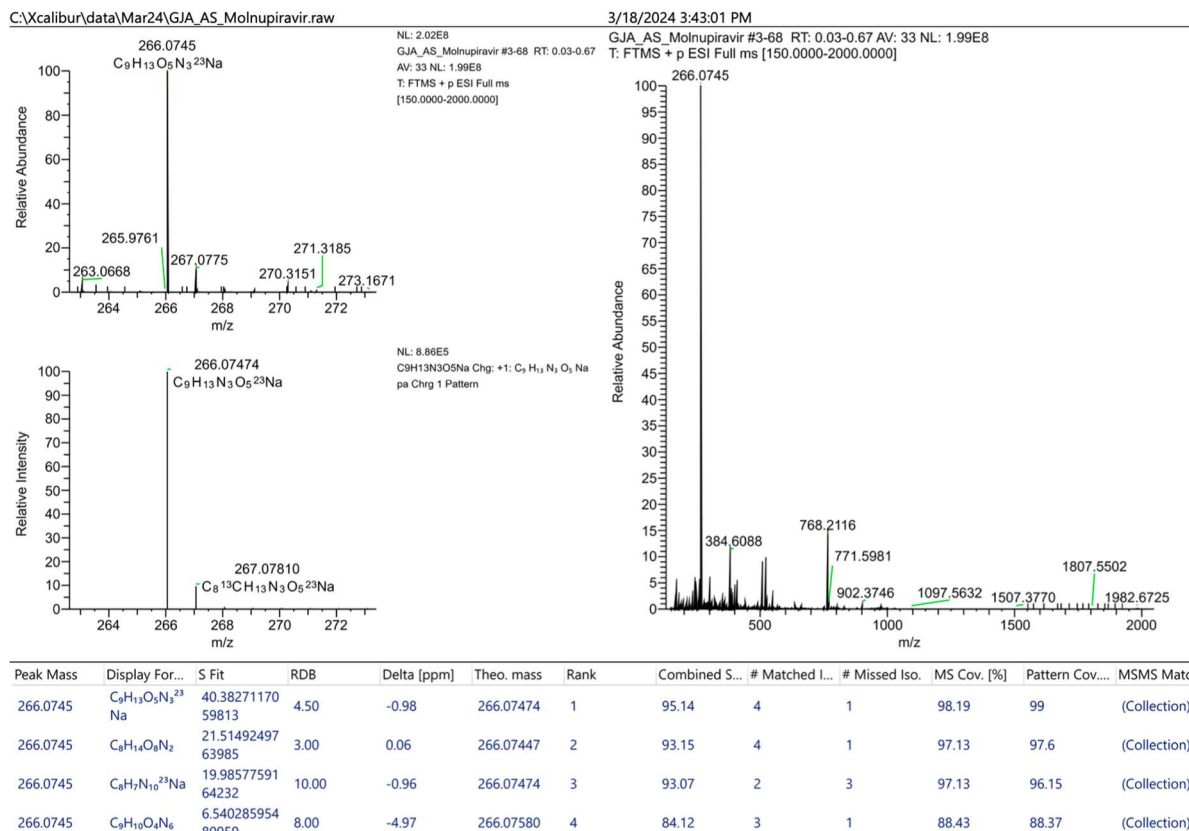

Figure S71- HRMS of nucleoside 27



## 2'-Deoxy-2-fluoro-6-chloropurine (32)

D368532.1.fid  
Person yhb21167  
AS.G.NUC  
@proton DMSO (C:\NMR\data) GAB 92

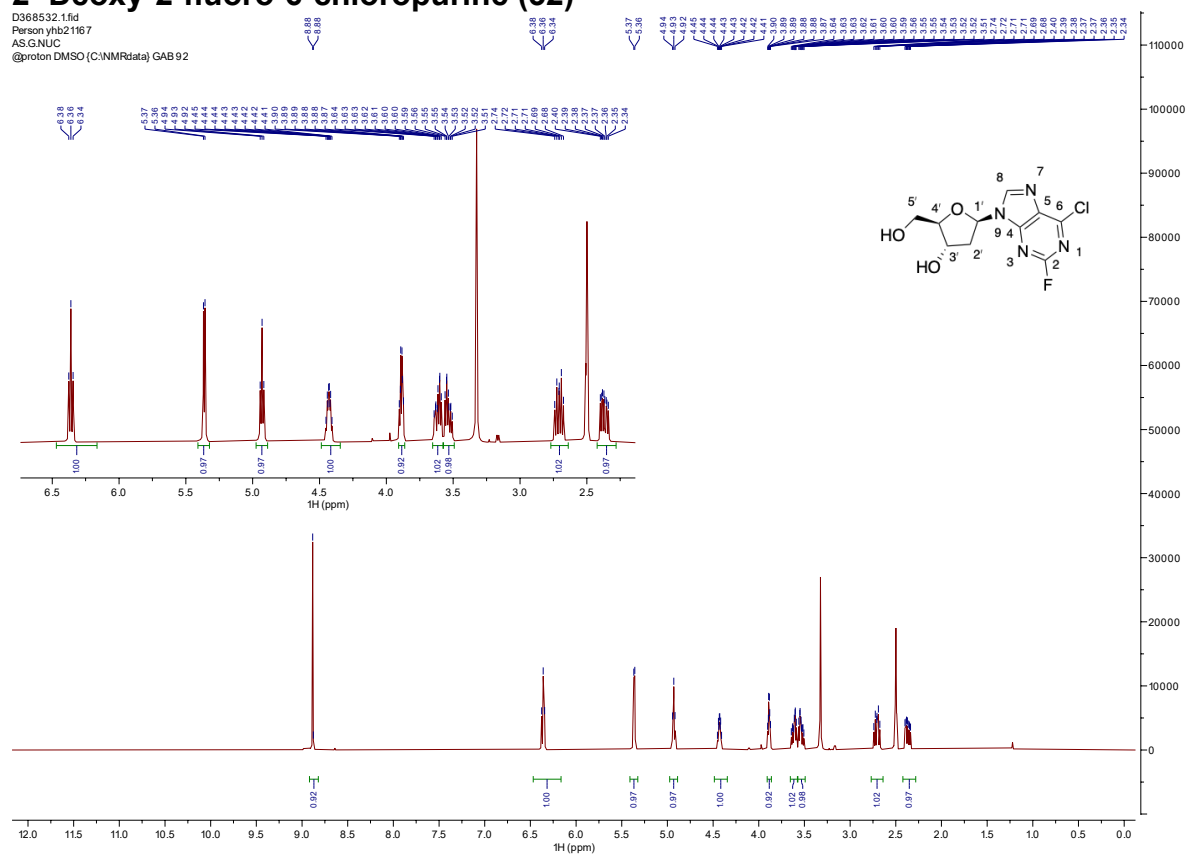

Figure S72 -  $^1\text{H}$  NMR spectra of nucleoside 32.

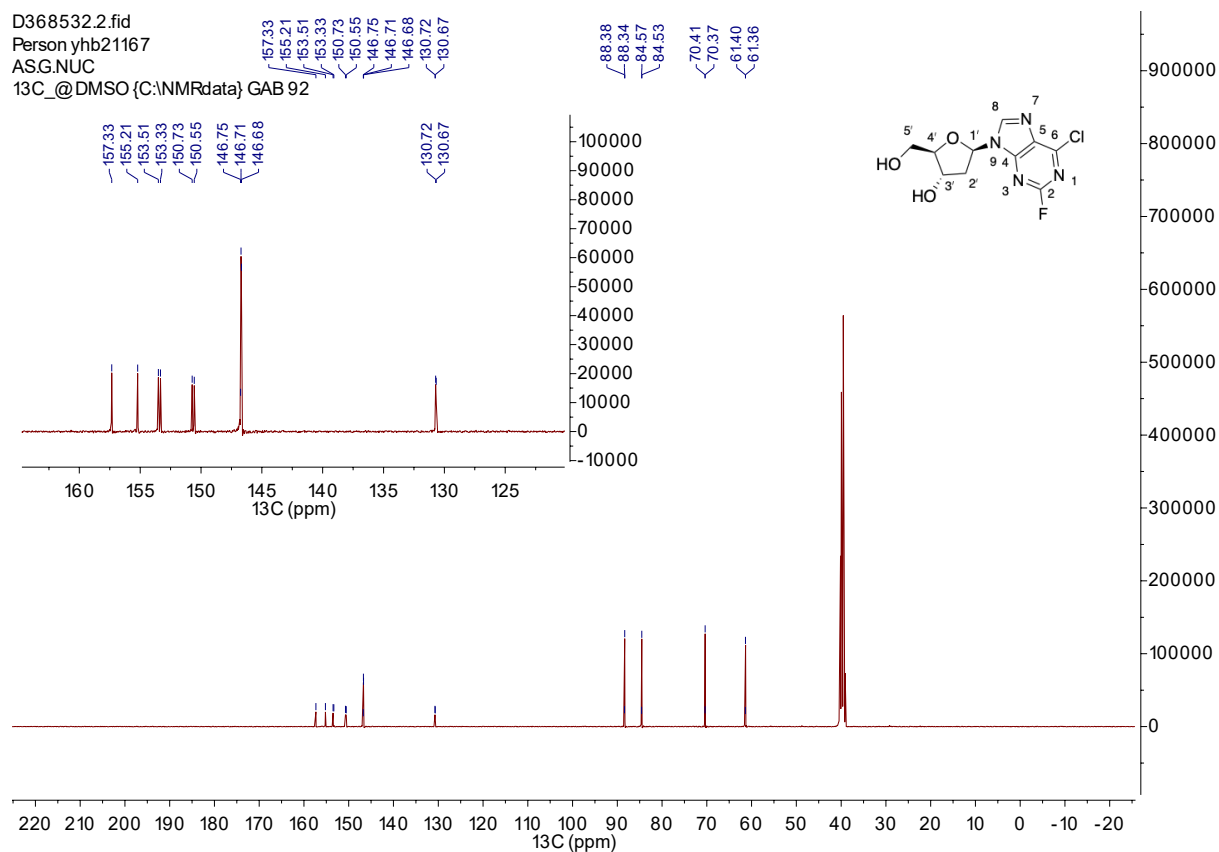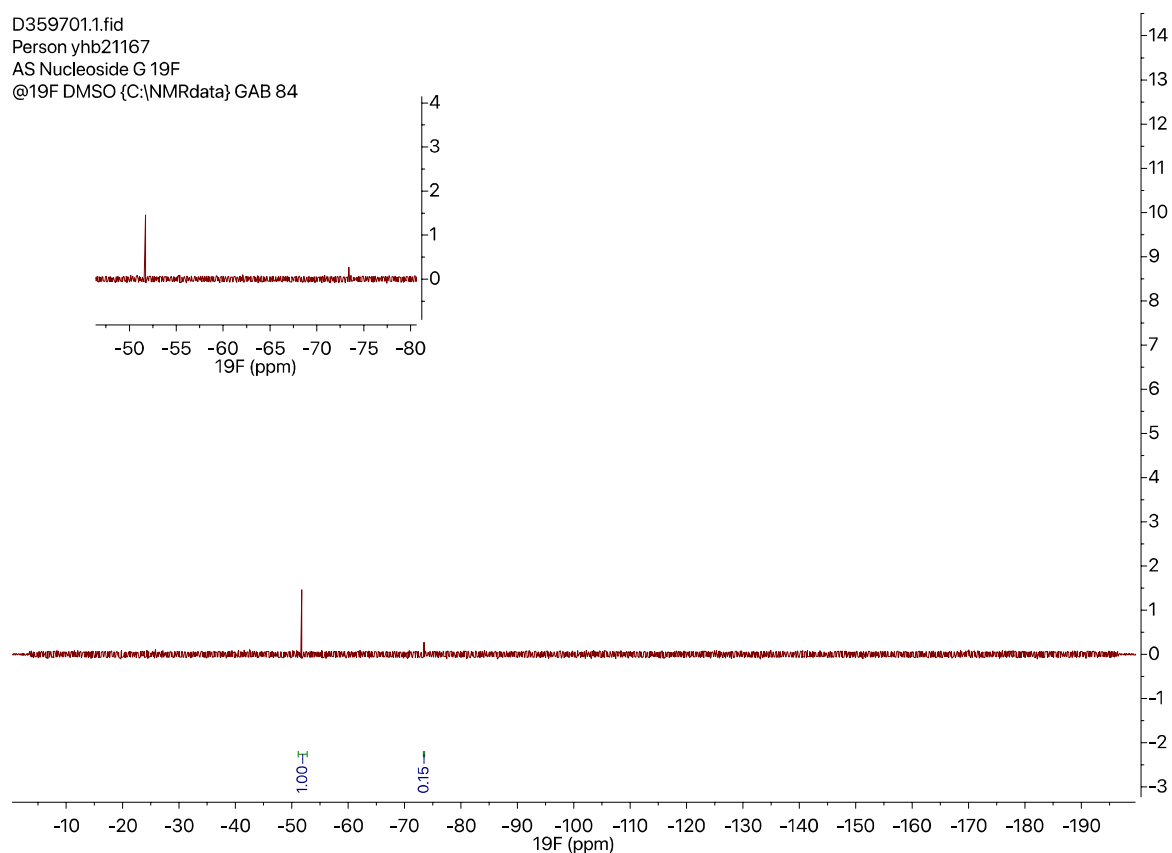

Injection Volume : 10 uL  
 Date Acquired : 22/04/2022 16:02:36  
 Date Processed : 22/04/2022 16:13:57

Acquired by : Shimadzu  
 Processed by : Shimadzu

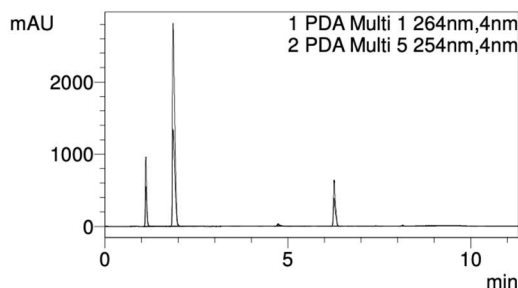

| Peak# | Ret. Time | Area     | Height  | ID# |
|-------|-----------|----------|---------|-----|
| 1     | 0.784     | 5531     | 2451    |     |
| 2     | 1.120     | 2410264  | 932236  |     |
| 3     | 1.316     | 1143     | 638     |     |
| 4     | 1.865     | 12055751 | 2756412 |     |
| 5     | 2.429     | 5875     | 1833    |     |
| 6     | 3.486     | 1740     | 764     |     |
| 7     | 3.616     | 1507     | 520     |     |
| 8     | 4.249     | 1243     | 439     |     |
| 9     | 4.736     | 243300   | 32785   |     |
| 10    | 5.389     | 1148     | 264     |     |
| 11    | 6.267     | 2408413  | 633560  |     |
| 12    | 6.676     | 10845    | 3573    |     |
| 13    | 6.946     | 1450     | 491     |     |
| 14    | 7.202     | 1041     | 293     |     |

Figure S75 - HPLC trace of the reaction used to obtain nucleoside 32. R.T = 1.1 = nucleobase cytosine released. 1.87 = Nucleoside dC. 4.74= Nucleobase left over. 6.27 = nucleoside 32.

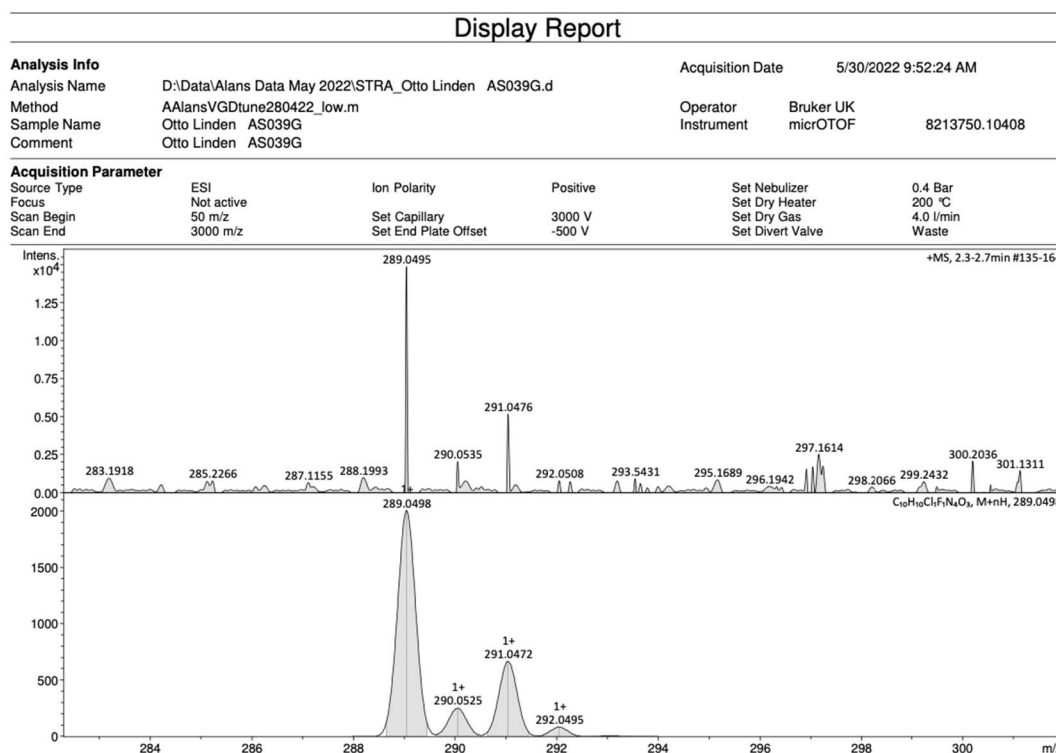

Figure S76 - HRMS of nucleoside 32.

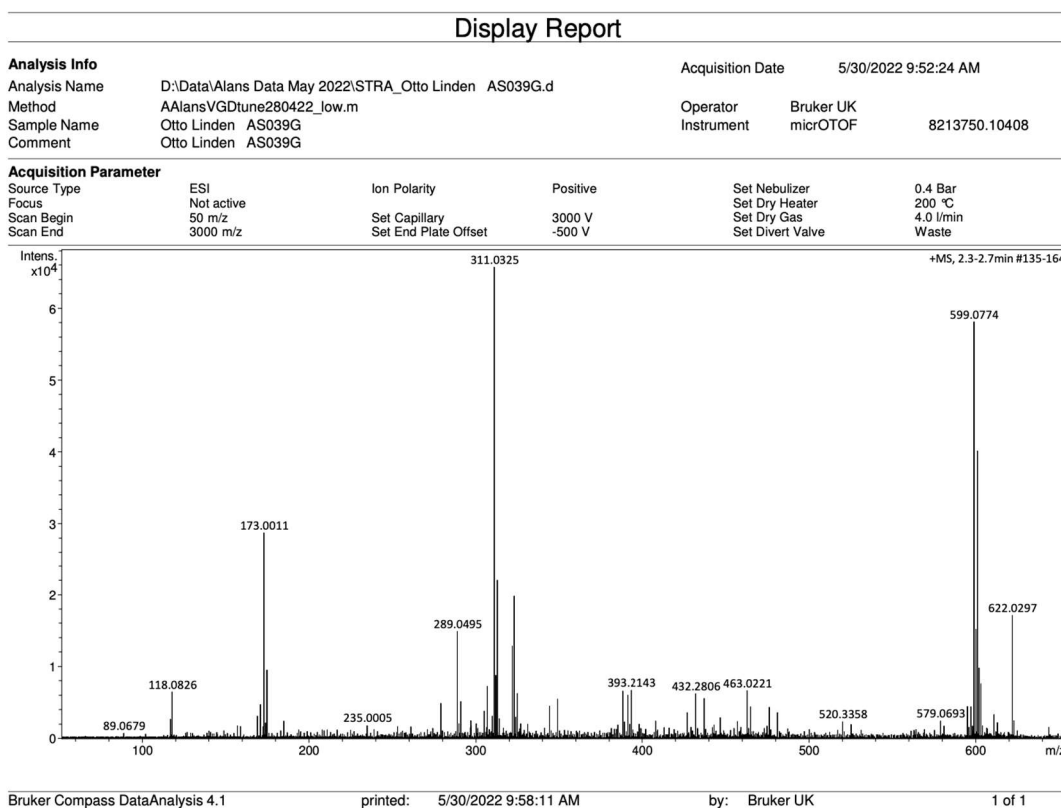

Figure S77 - HRMS of nucleoside 32.

## 2'-Deoxy-6-chloroguanosine (33)

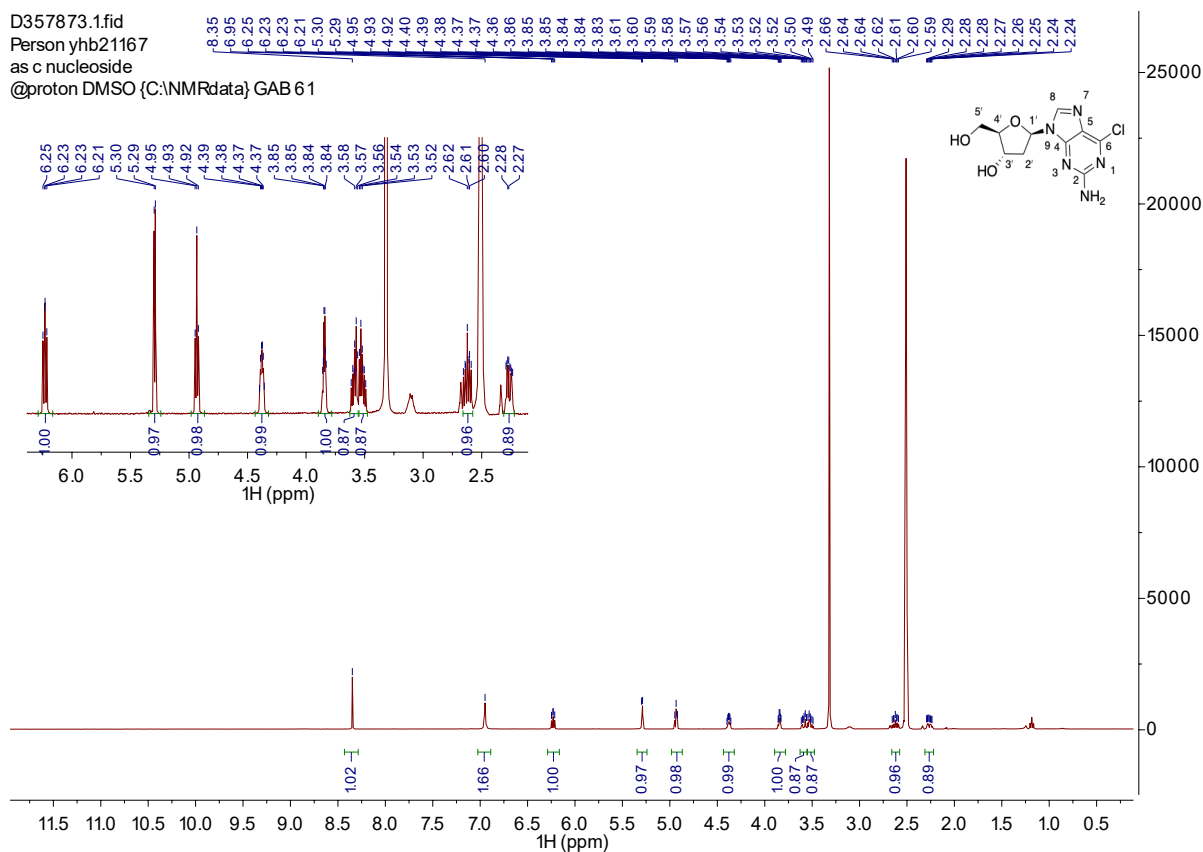

Figure S78 -  $^1\text{H}$  NMR spectra of nucleoside **33**

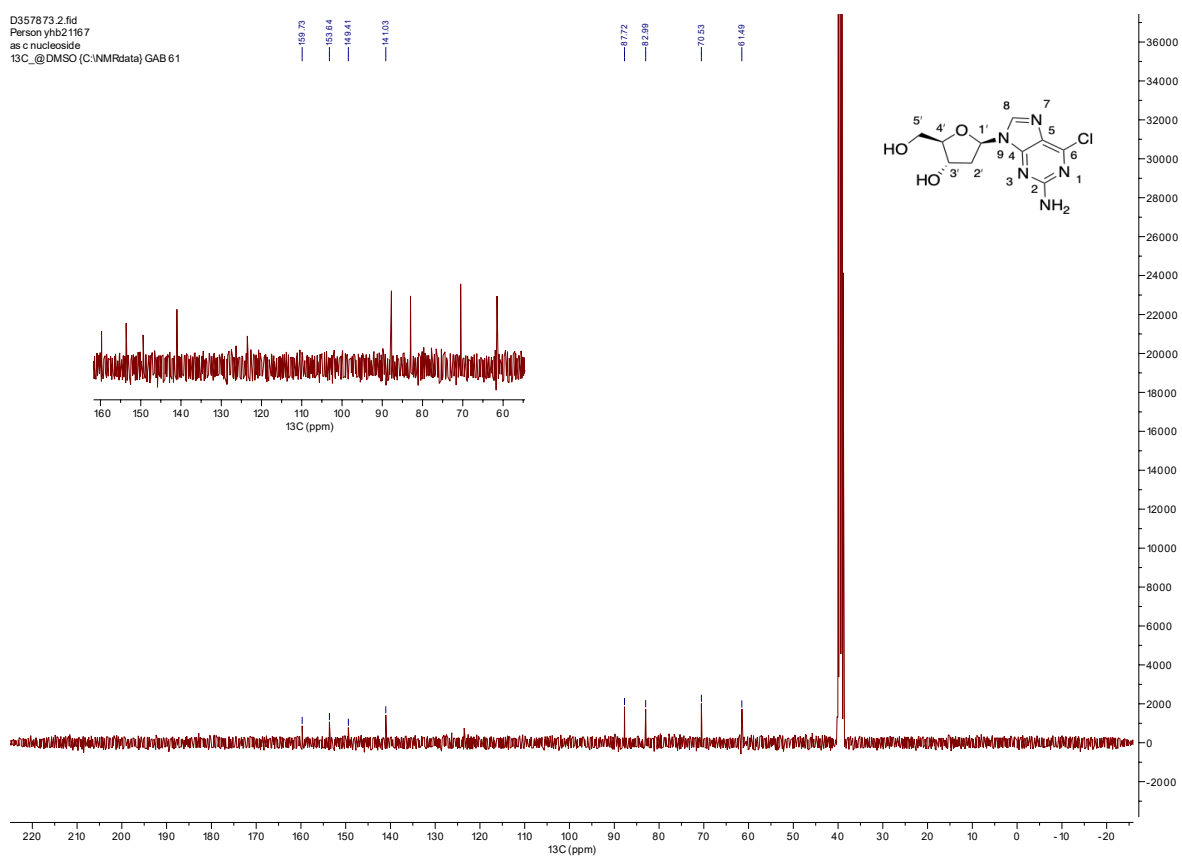

Figure S79 -  $^{13}\text{C}\{^1\text{H}\}$ -NMR spectra of nucleoside **33**

Sample Name : C AS028  
 Sample ID :  
 Data Filename : REACTIONS\_24022022\_010.lcd  
 Method Filename : Admir Trans glyco Run.lcm  
 Batch Filename : REACTIONS.lcb  
 Vial # : 1-18  
 Injection Volume : 10 uL  
 Date Acquired : 24/02/2022 16:49:48  
 Date Processed : 24/02/2022 17:01:09

Sample Type : Unknown  
 Acquired by : Shimadzu  
 Processed by : Shimadzu

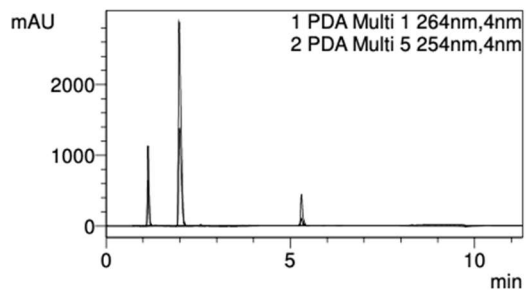

| Peak# | Ret. Time | Area     | Height  | ID# |
|-------|-----------|----------|---------|-----|
| 1     | 0.798     | 4214     | 2127    |     |
| 2     | 0.878     | 2271     | 571     |     |
| 3     | 1.007     | 2844     | 693     |     |
| 4     | 1.140     | 3250098  | 1121268 |     |
| 5     | 1.348     | 34698    | 8632    |     |
| 6     | 1.681     | 5918     | 704     |     |
| 7     | 1.984     | 13869902 | 2842731 |     |
| 8     | 2.459     | 4203     | 1282    |     |
| 9     | 2.571     | 45613    | 12291   |     |
| 10    | 3.096     | 1728     | 136     |     |
| 11    | 3.329     | 2547     | 793     |     |
| 12    | 3.587     | 6290     | 2071    |     |
| 13    | 3.711     | 19967    | 7920    |     |
| 14    | 3.894     | 10641    | 3480    |     |
| 15    | 4.022     | 1284     | 449     |     |
| 16    | 5.303     | 392110   | 102252  |     |
| 17    | 5.890     | 1299     | 483     |     |

Figure S80 - HPLC trace for the reaction used to obtain nucleoside **33**. R.T = 1.14 = nucleobase released cytosine, 1.98 = nucleoside dC, 5.30 = target nucleoside **33**

JRB\_AS028C #14-89 RT: 0.14-0.85 AV: 38 NL: 7.38E7  
T: FTMS + p ESI Full ms [150.0000-2000.0000]

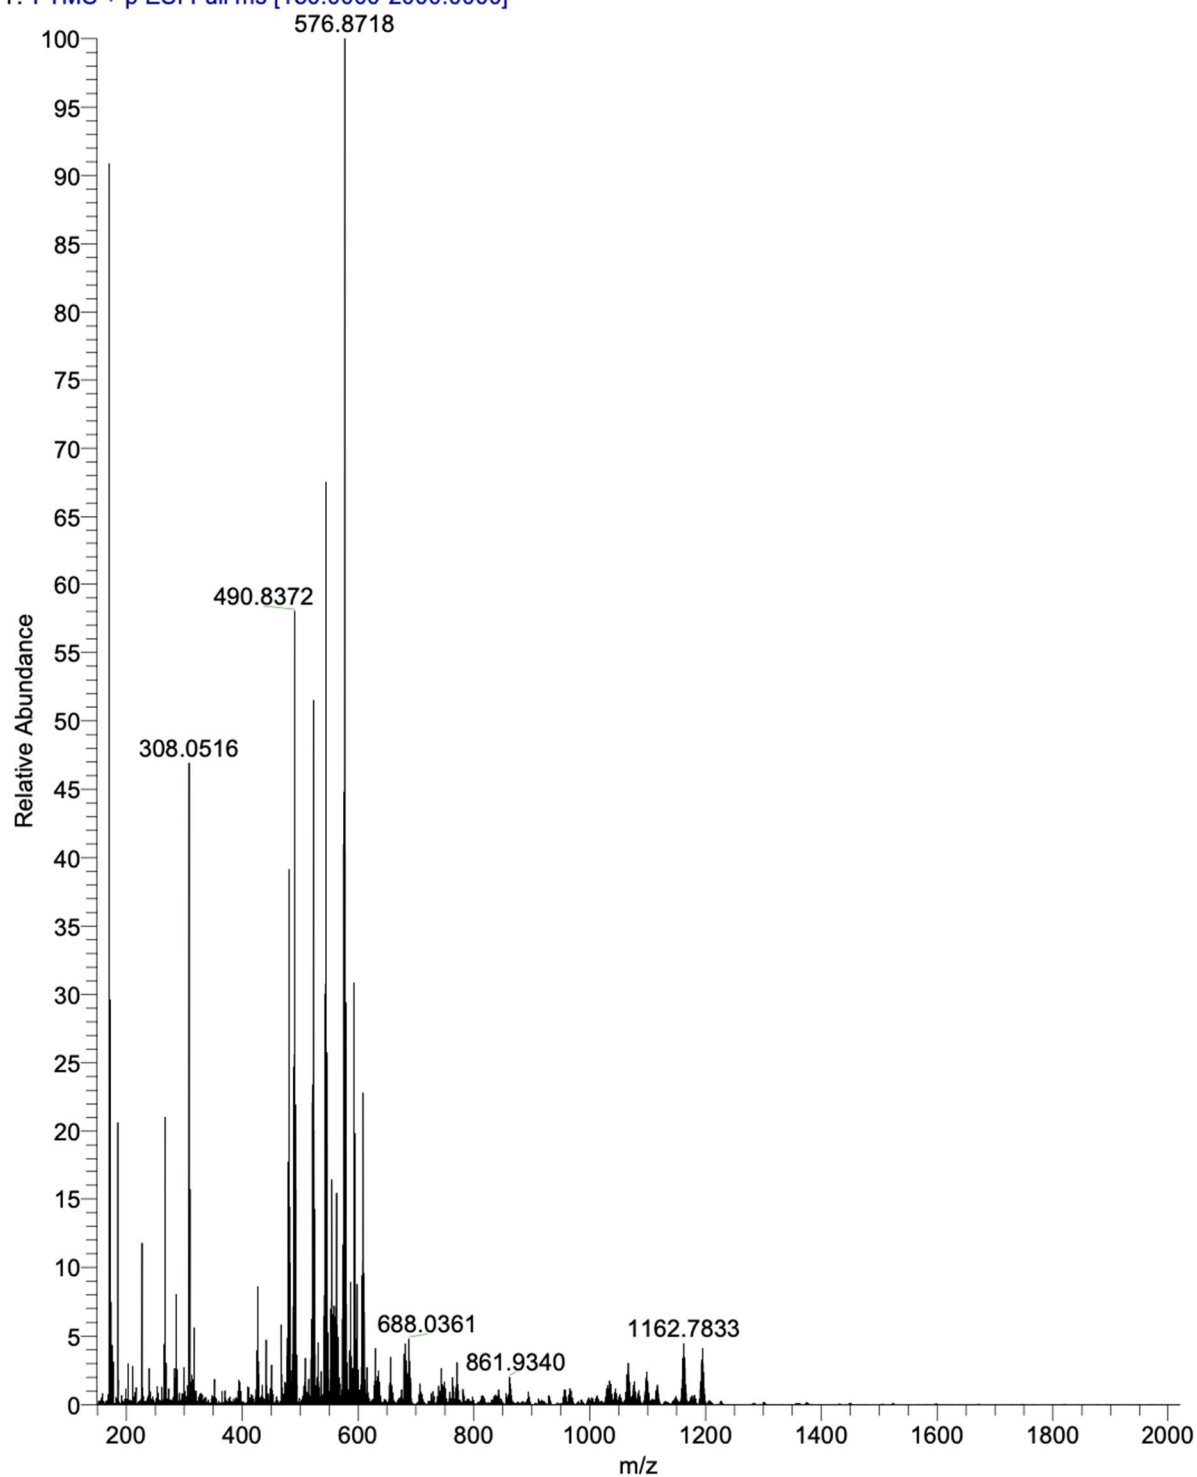

Figure S81 - HRMS of nucleoside 33

JRB\_AS028C #14-89 RT: 0.14-0.85 AV: 38 NL: 5.93E6

T: FTMS + p ESI Full ms [150.0000-2000.0000]

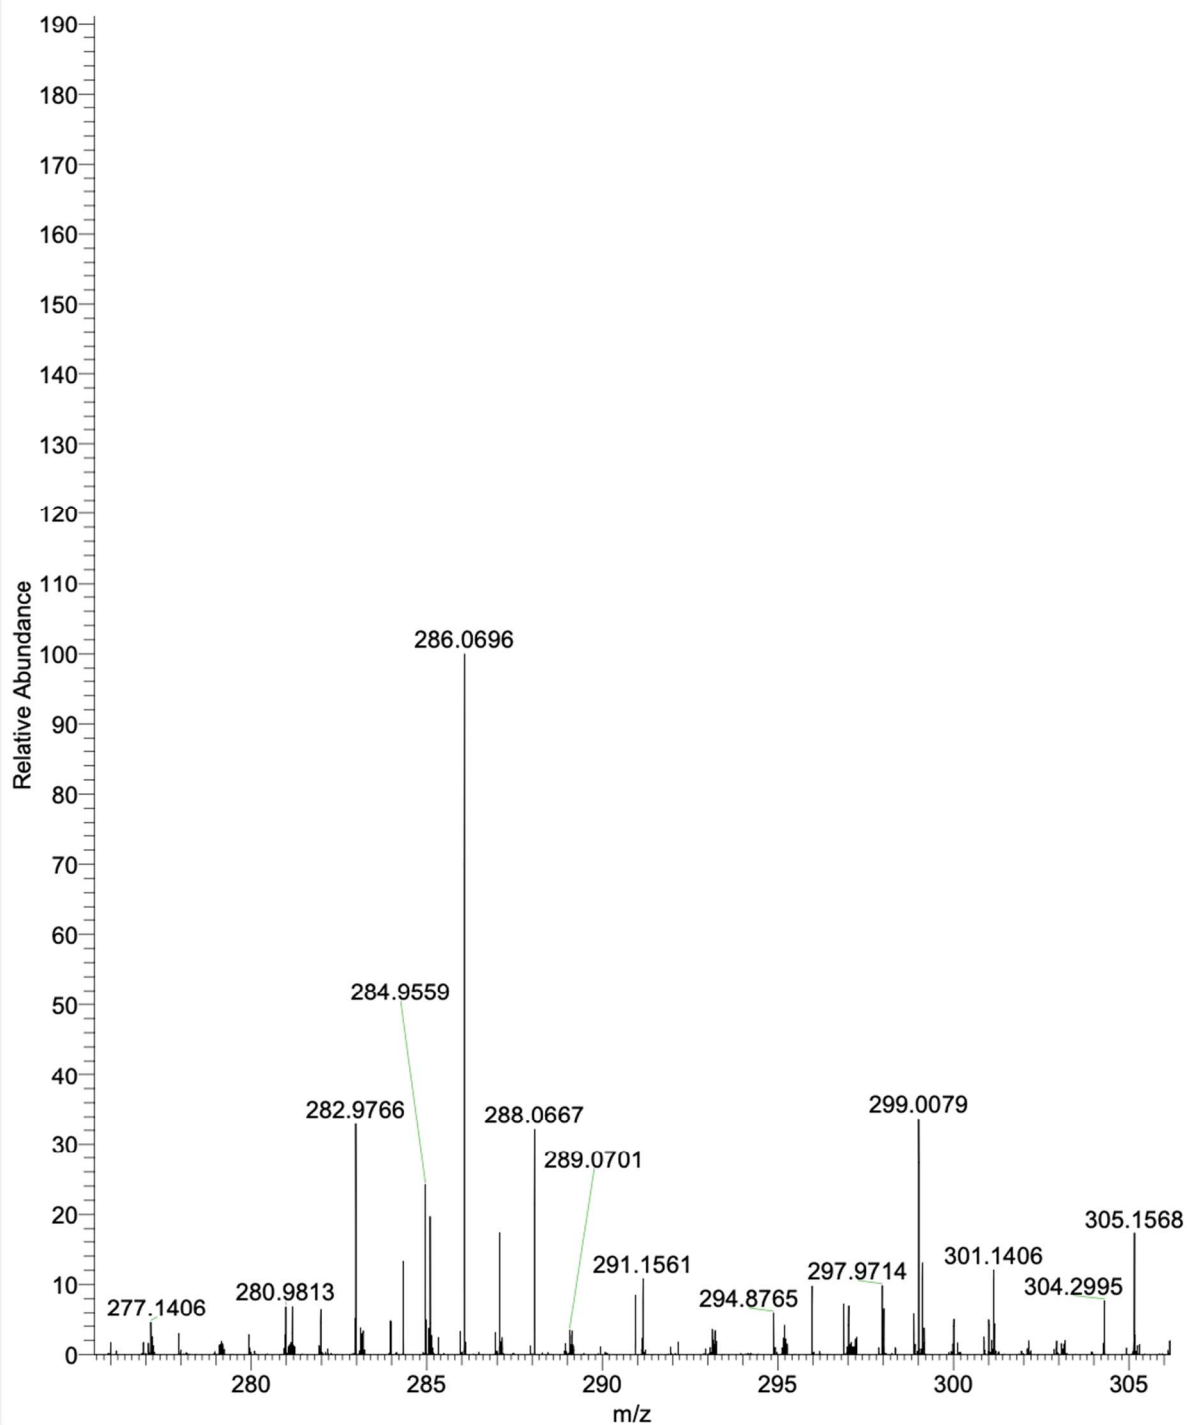

Figure S82 - HRMS of nucleoside 33

**2'-Deoxy-2-iodo-6-chloropurine (34)**



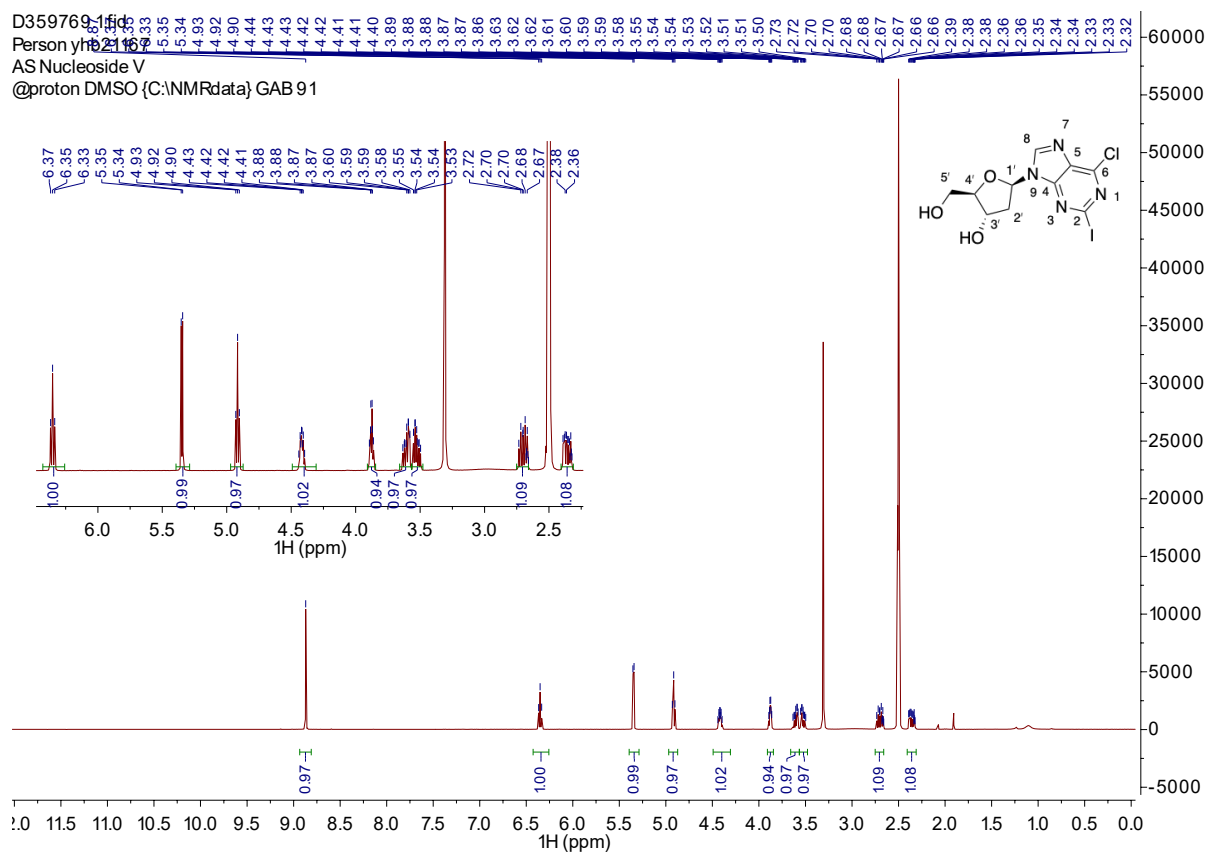

Figure S83 -  $^1\text{H}$  NMR spectra for nucleoside **34**.

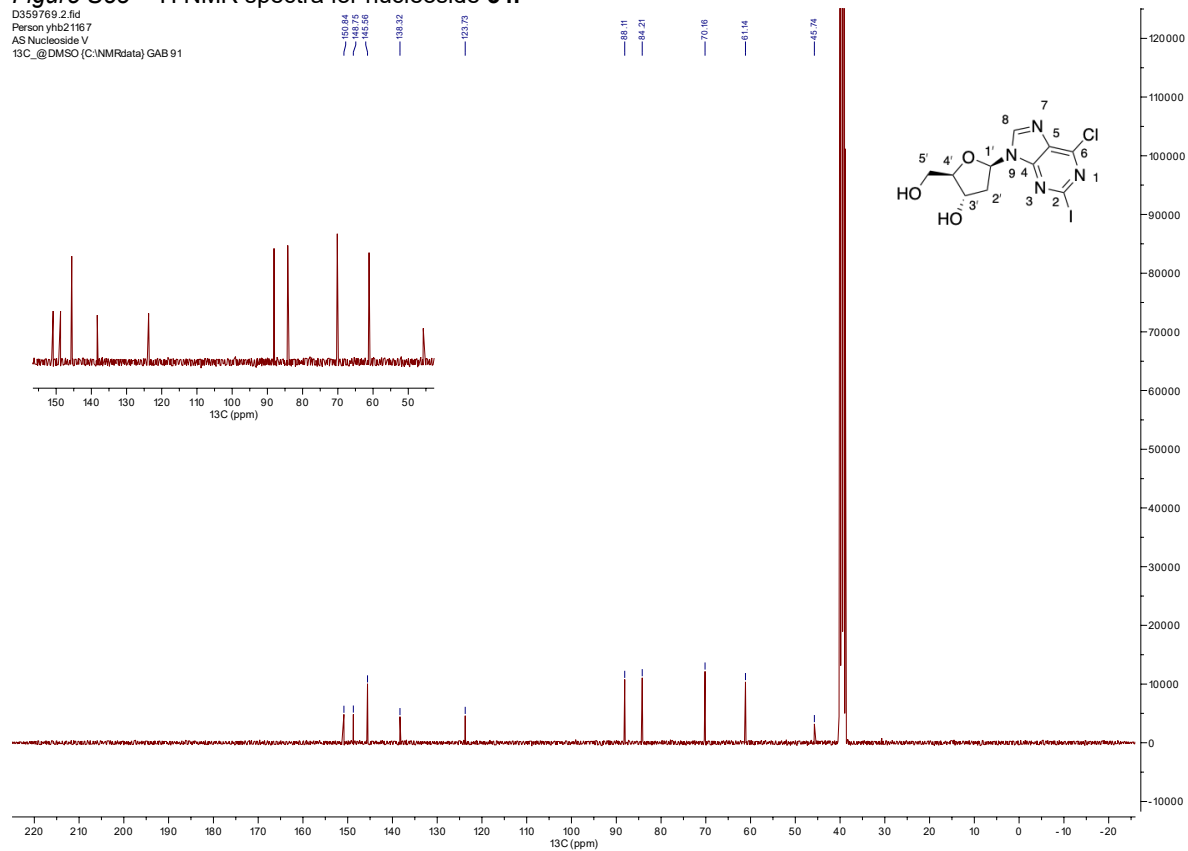

Figure S84 -  $^{13}\text{C}\{^1\text{H}\}$ -NMR spectra for nucleoside **34**.

Sample Name : V2 RXN  
Sample ID :  
Data Filename : V2 RXN\_12052022\_003.lcd  
Method Filename : Admir Trans glyco Run.lcm  
Batch Filename : V2 RXN.lcb  
Vial # : 1-11  
Injection Volume : 10 uL  
Date Acquired : 12/05/2022 12:12:21  
Date Processed : 12/05/2022 12:23:42

Sample Type : Unknown  
Acquired by : Shimadzu  
Processed by : Shimadzu

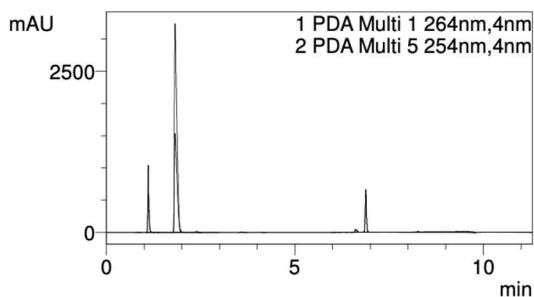

| Peak# | Ret. Time | Area     | Height  | ID# |
|-------|-----------|----------|---------|-----|
| 1     | 0.797     | 5683     | 2717    |     |
| 2     | 0.876     | 1255     | 534     |     |
| 3     | 1.112     | 2269177  | 999098  |     |
| 4     | 1.298     | 8464     | 2957    |     |
| 5     | 1.824     | 14849851 | 3195860 |     |
| 6     | 2.396     | 39746    | 10805   |     |
| 7     | 3.588     | 16828    | 7091    |     |
| 8     | 4.154     | 1226     | 352     |     |
| 9     | 6.102     | 3083     | 570     |     |
| 10    | 6.431     | 1963     | 503     |     |
| 11    | 6.614     | 182796   | 47545   |     |
| 12    | 6.883     | 1550750  | 650555  |     |
| 13    | 7.150     | 1605     | 485     |     |
| 14    | 7.504     | 1058     | 227     |     |
| 15    | 7.575     | 2435     | 479     |     |

Figure S85 - HPLC trace for the reaction used to obtain nucleoside **34**. R.T = 1.11 = nucleobase cytosine, 1.82 = dC, 6.61 = nucleobase V, 6.88 = nucleoside **34**.

### Display Report

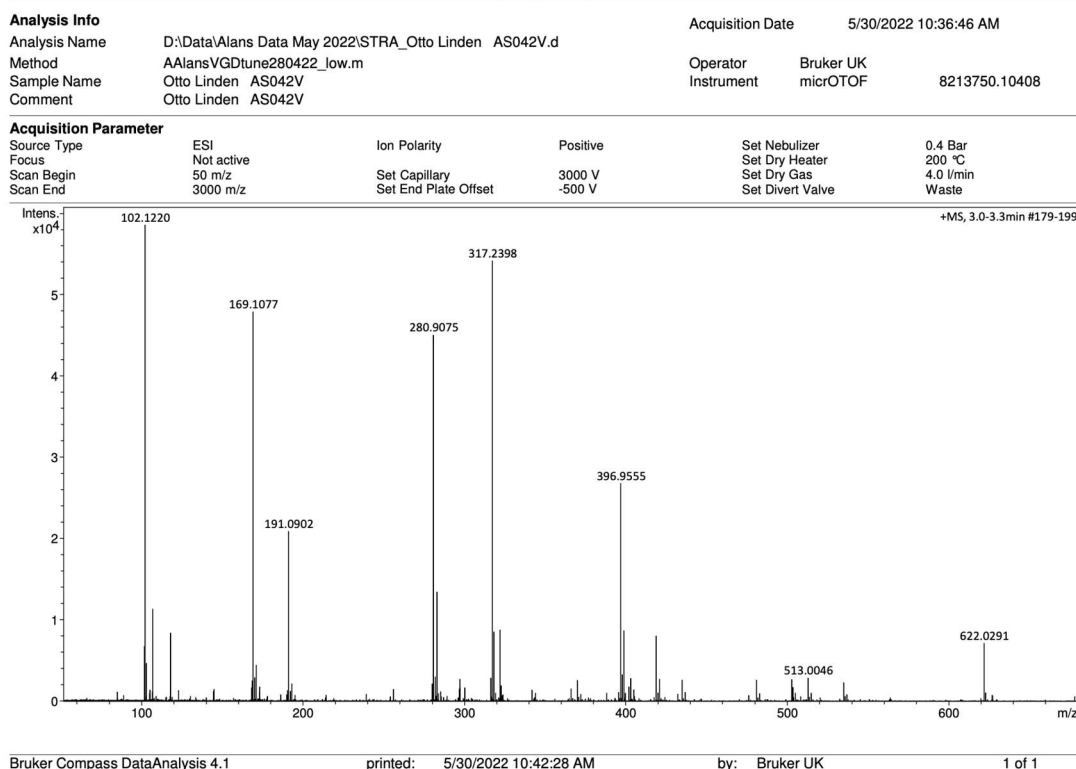

Figure S86 - HRMS of nucleoside **34**.

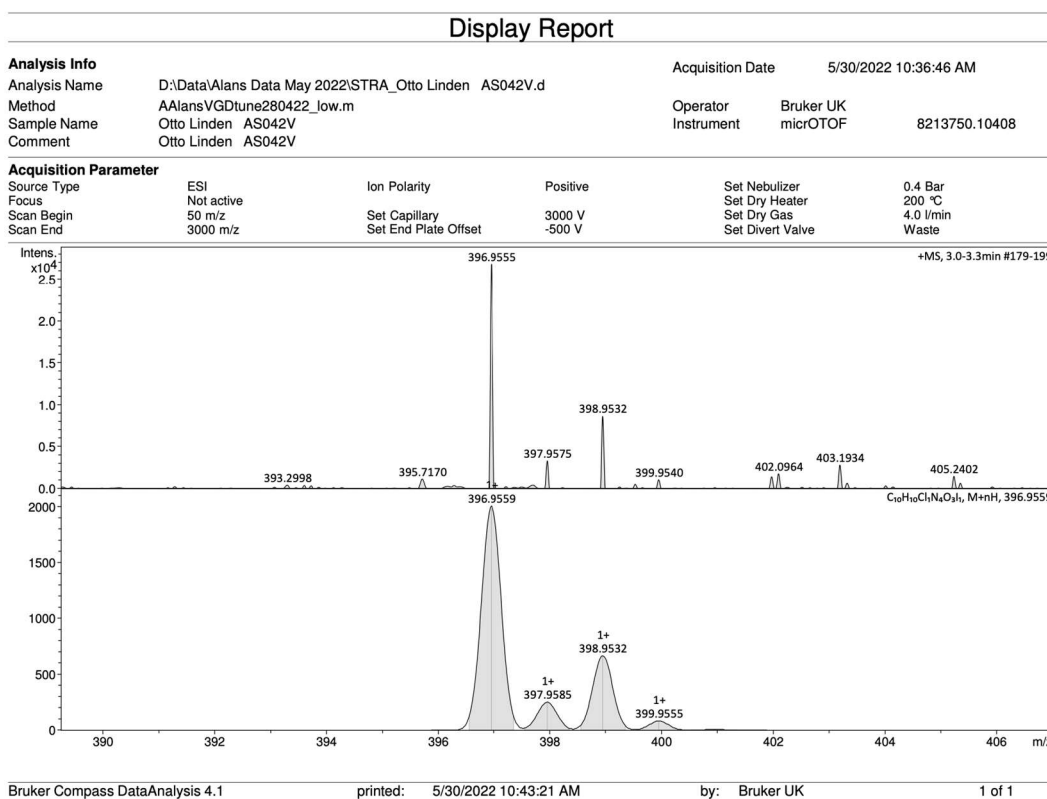

Figure S87 - HRMS of nucleoside **34**.

## 2'-Deoxy-4-acetamide-6chloropurine (35)

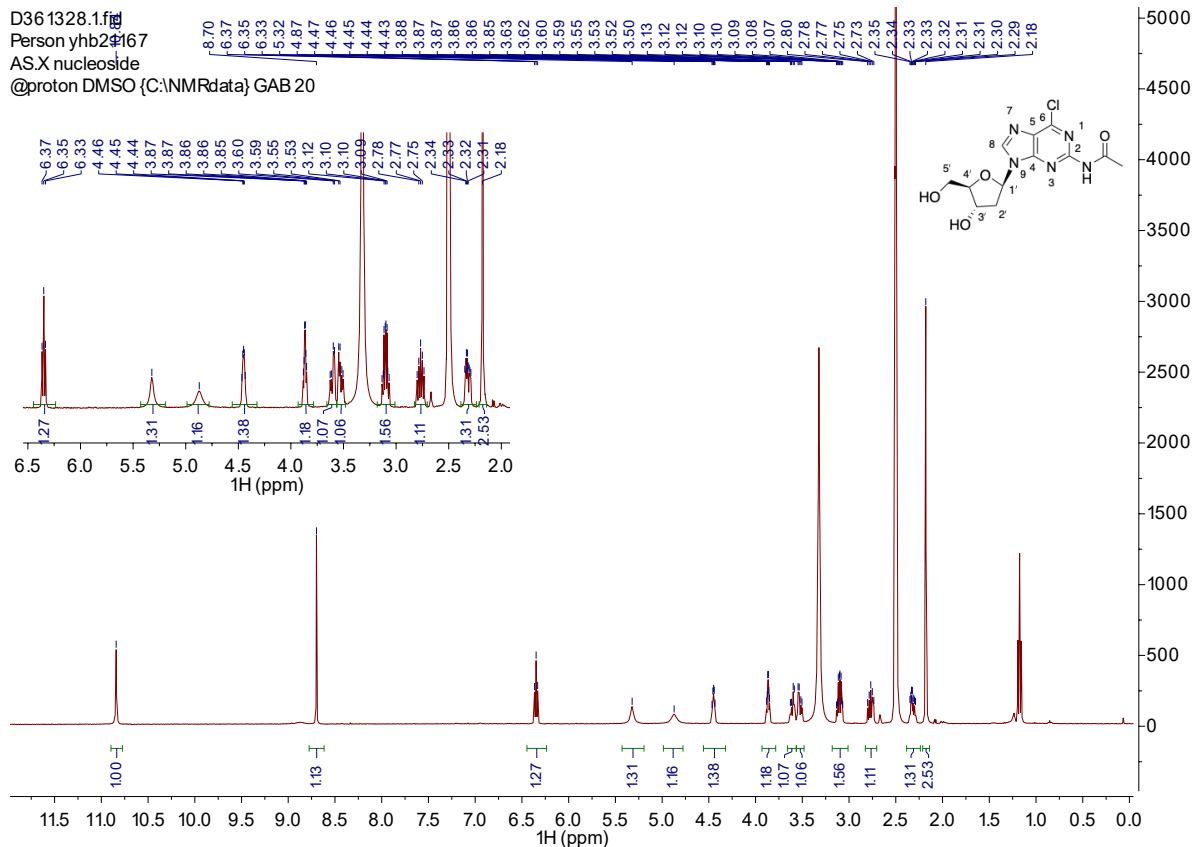

Figure S88 - <sup>1</sup>H of Nucleoside **35**

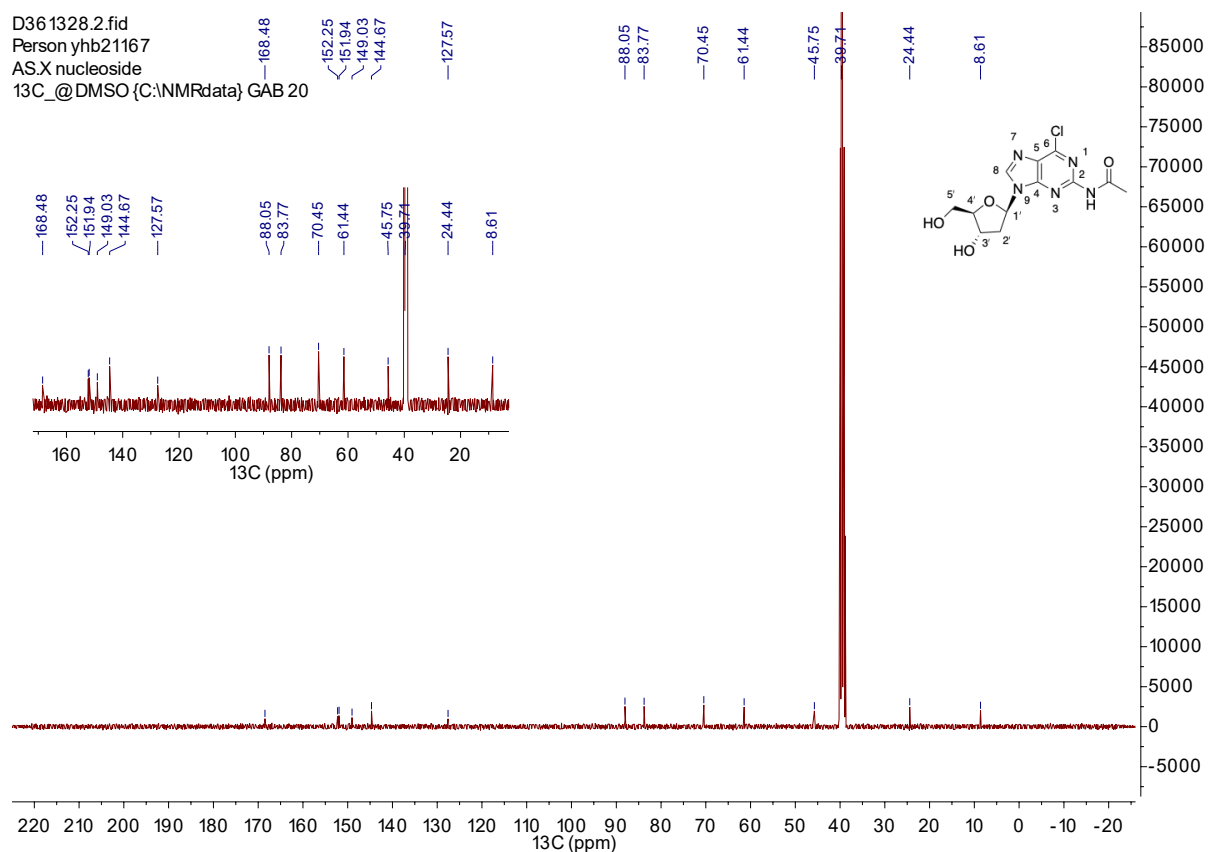

Sample Name : X RXN  
 Sample ID :  
 Data Filename : RXNS\_09062022\_004.lcd  
 Method Filename : Admir Trans glyco Run.lcm  
 Batch Filename : RXNS.lcb  
 Vial # : 1-49  
 Injection Volume : 10  $\mu\text{L}$   
 Date Acquired : 09/06/2022 17:41:21  
 Date Processed : 09/06/2022 17:52:42

Sample Type : Unknown  
 Acquired by : Shimadzu  
 Processed by : Shimadzu

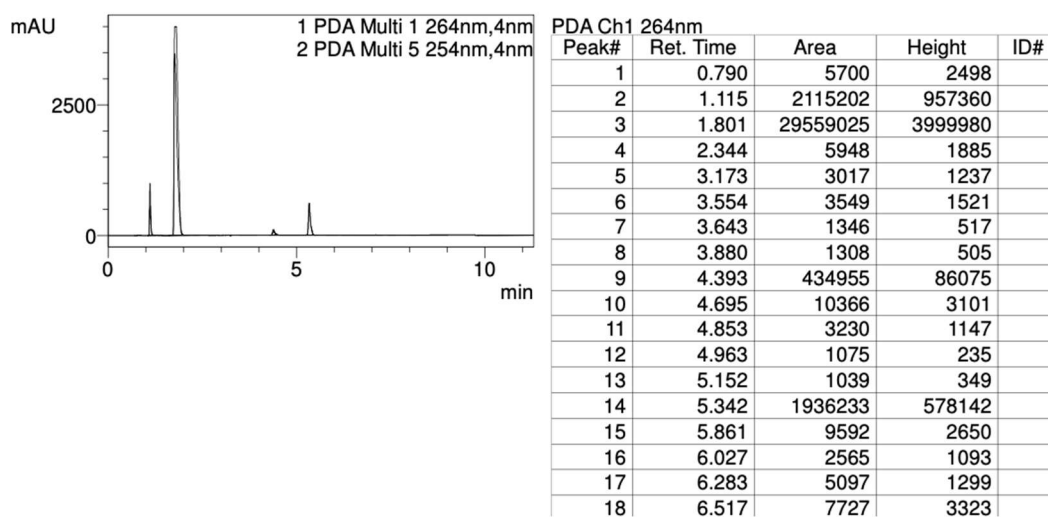

Figure S90 - HPLC trace of the reaction to obtain Nucleoside **35**. R.T = 1.12 = nucleobase cytosine, 1.80 = dC, 4.39 = nucleobase, 5.34 = Nucleoside **35**

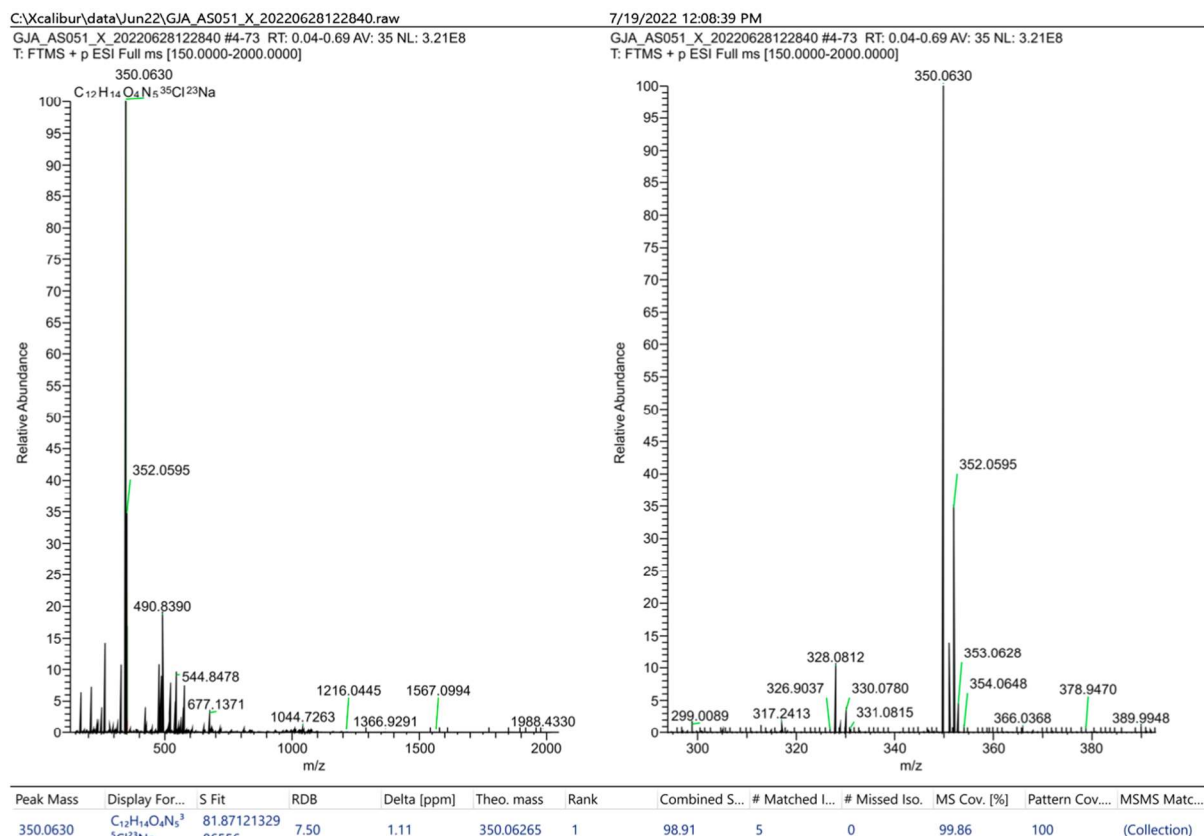

Figure S91 - HRMS spectra of the Nucleoside **35** sodium adduct.

## 2'-Deoxy-6-thioguanosine (**36**)

D368533.1.fid  
 Person\yhb21167

AS.N.Nuc

@proton DMSO {C:\NMRdata} GAB 93

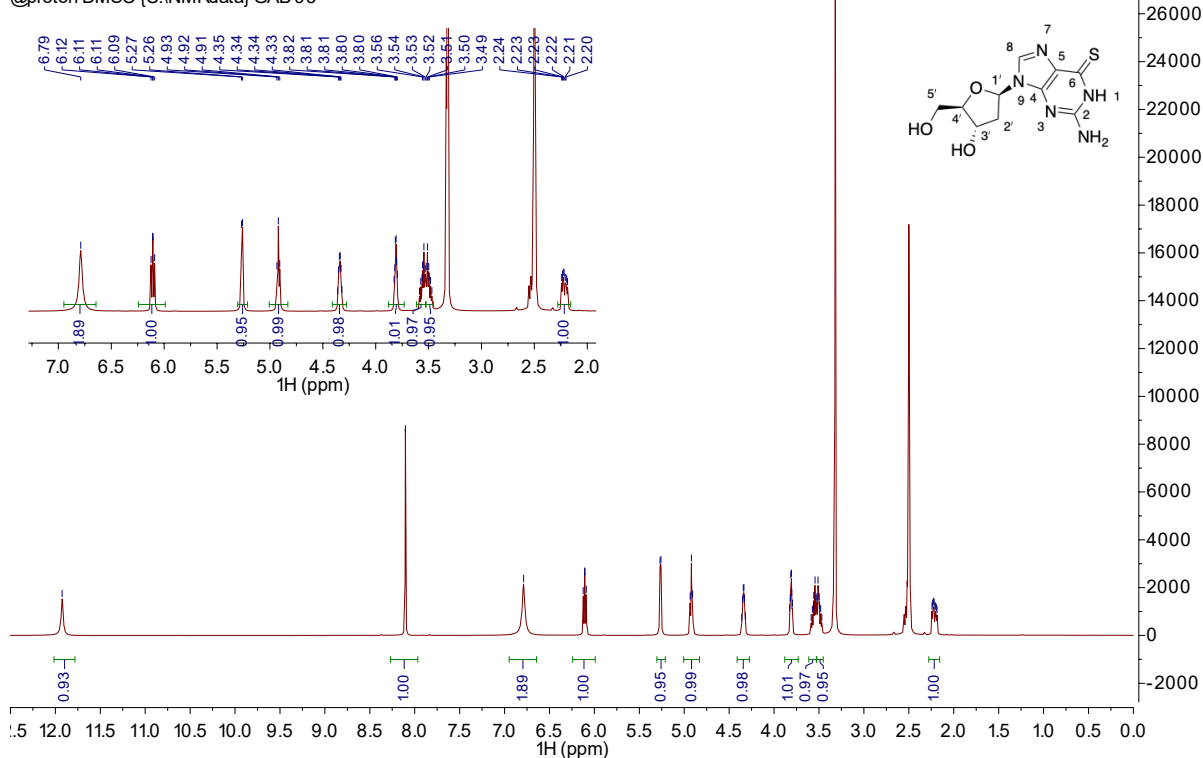

Figure S92 - <sup>1</sup>H NMR spectra for nucleoside **36**

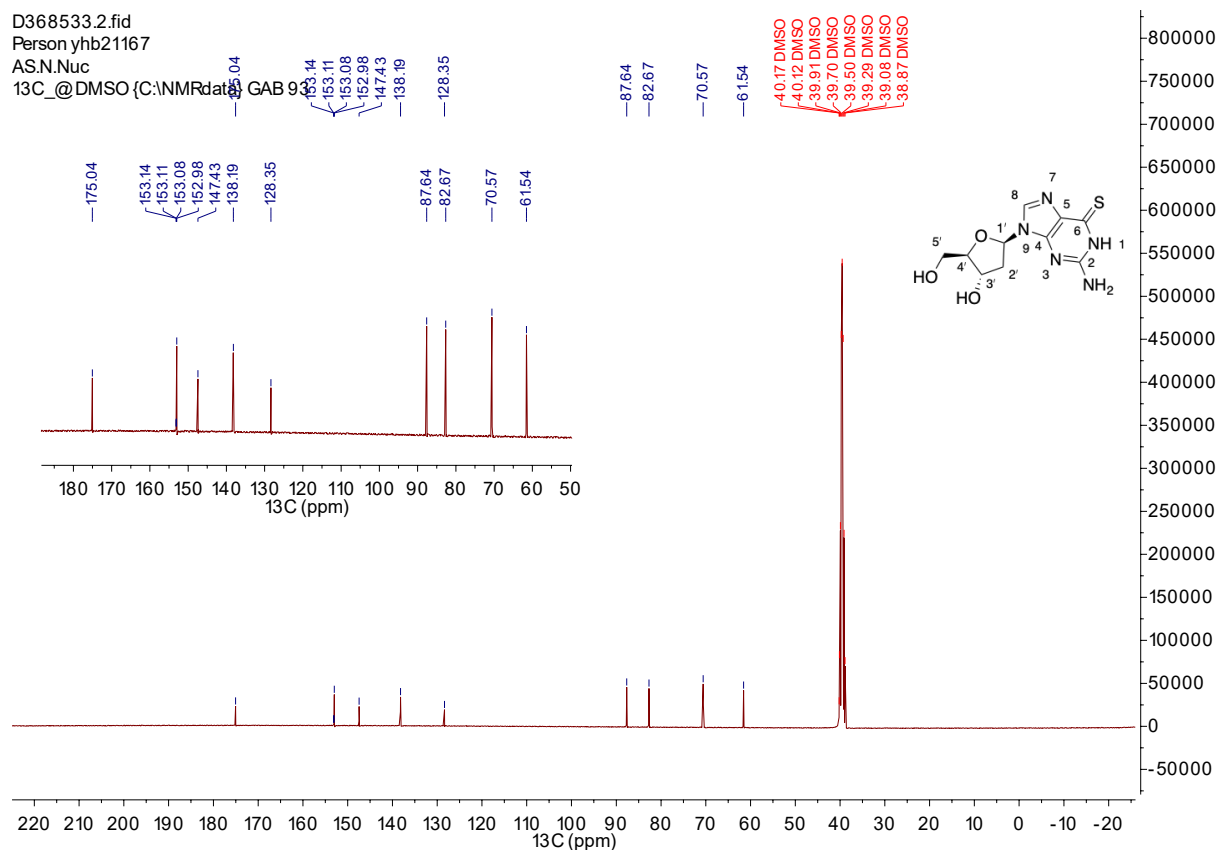

Sample Name : as029 N  
 Sample ID :  
 Data Filename : BASE N\_02032022\_003.lcd  
 Method Filename : Admir Trans glyco Run.lcm  
 Batch Filename : BASE N.lcb  
 Vial # : 1-25  
 Injection Volume : 10 uL  
 Date Acquired : 02/03/2022 16:53:58  
 Date Processed : 02/03/2022 17:05:19

Sample Type : Unknown  
 Acquired by : Shimadzu  
 Processed by : Shimadzu

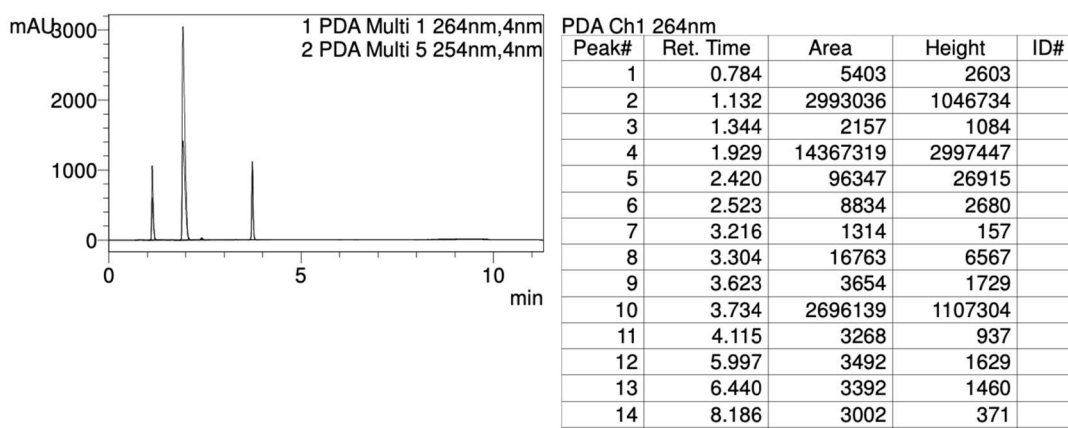

Figure S94 - HPLC trace for the reaction used to obtain nucleoside **36**. R.T 1.13 = released cytosine nucleobase, 1.93 = nucleoside donor dC, 2.42 = nucleobase N, 3.73 = target nucleoside **36**

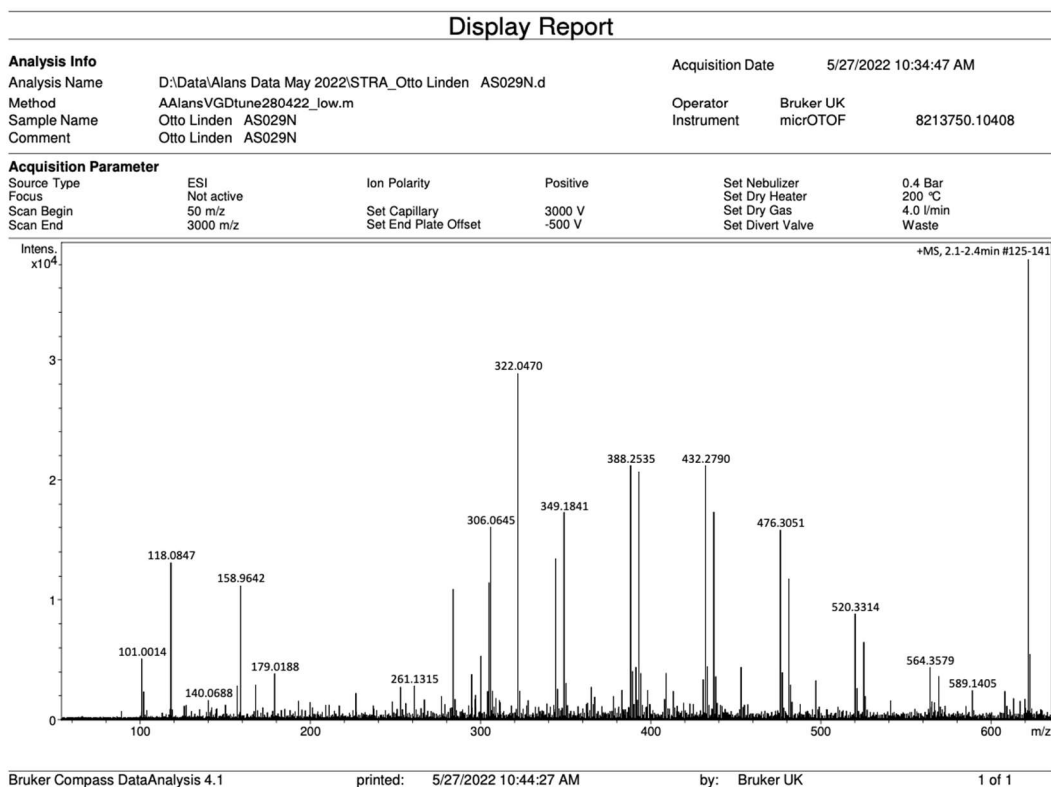

Figure S95 - HRMS for nucleoside **36**

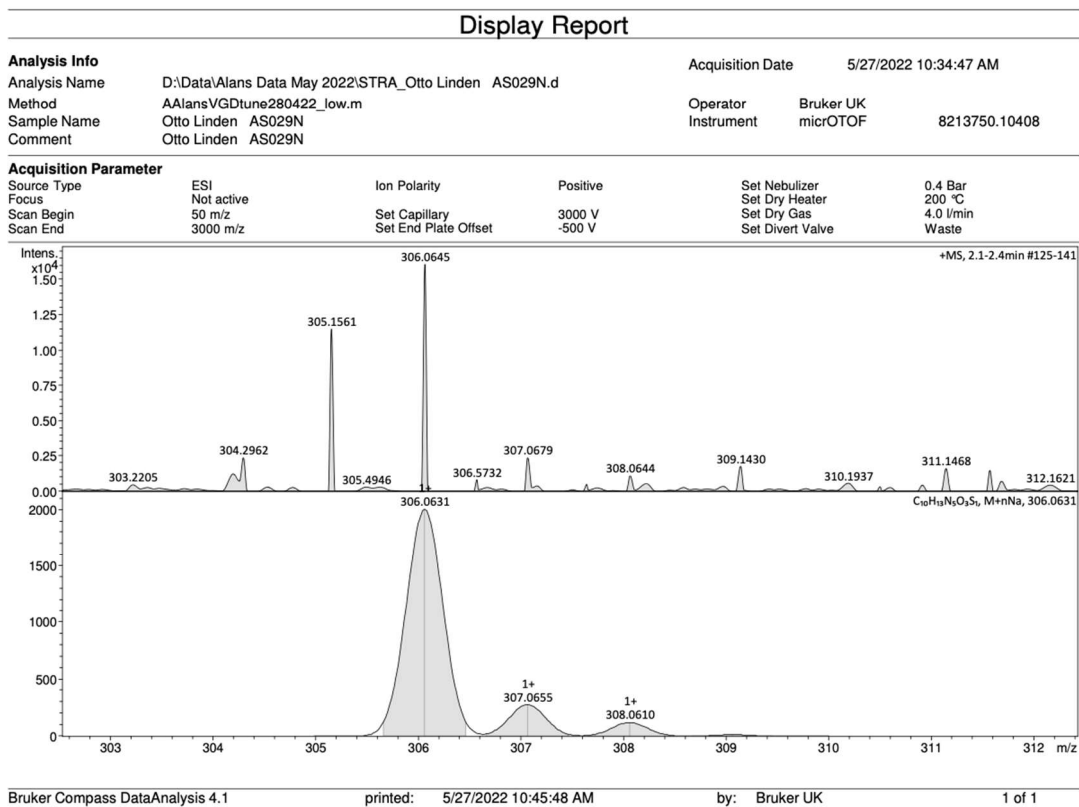

Figure S96 - HRMS for nucleoside **36**

## 2'-Deoxy-6-O-methylguanosine (37)

D357764.1.fid  
Person yhb21167  
AS nucleoside t  
@proton DMSO {C:\NMRdata} GAB 44

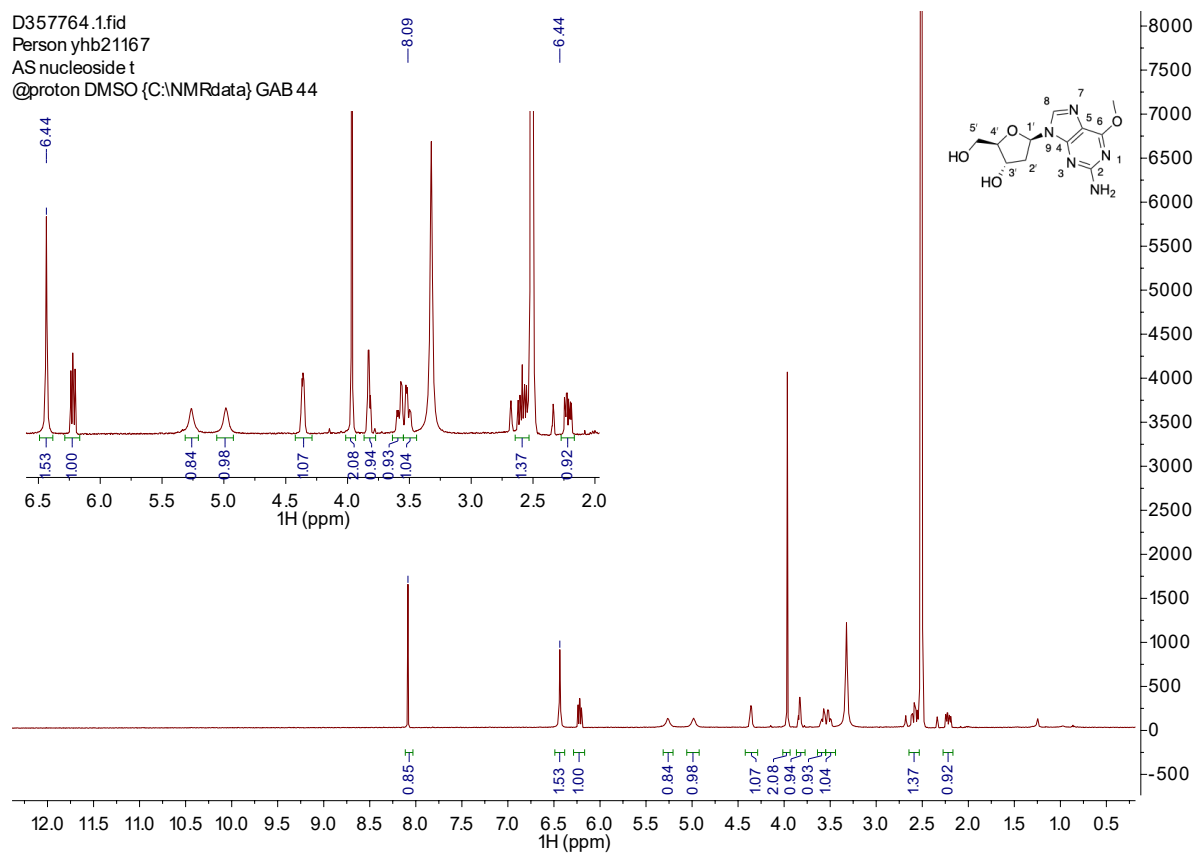

Figure S97 - <sup>1</sup>H NMR spectra of nucleoside **37**

D357986.1.fid  
Person yhb21167  
as nucleoside t  
13C\_@DMSO {C:\NMRdata} GAB 92

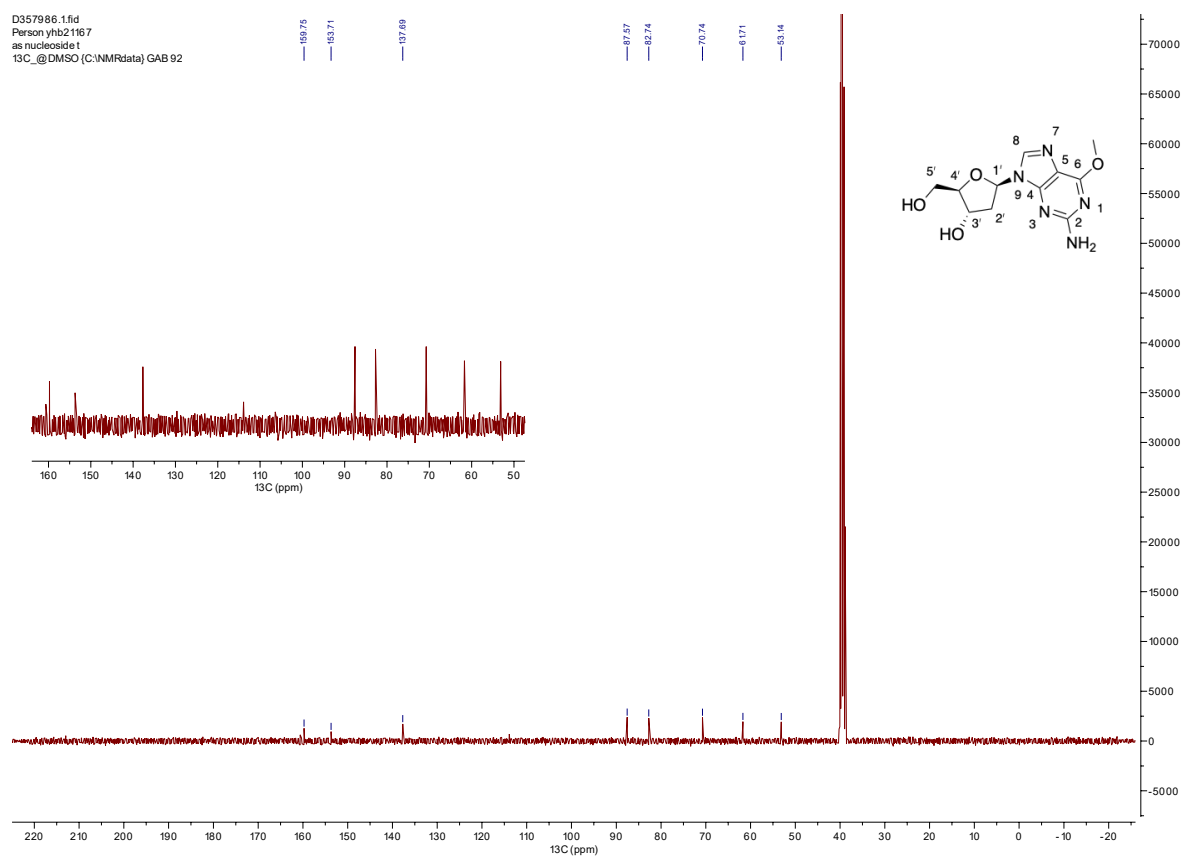



Figure S98 -  $^{13}\text{C}\{^1\text{H}\}$ -NMR spectra of nucleoside **37**

Sample Name : T AS028  
Sample ID :  
Data Filename : REACTIONS\_24022022\_005.lcd  
Method Filename : Admir Trans glyco Run.lcm  
Batch Filename : REACTIONS.lcb  
Vial # : 1-5  
Injection Volume : 10  $\mu\text{L}$   
Date Acquired : 24/02/2022 15:50:55  
Date Processed : 24/02/2022 16:02:15

Sample Type : Unknown  
Acquired by : Shimadzu  
Processed by : Shimadzu

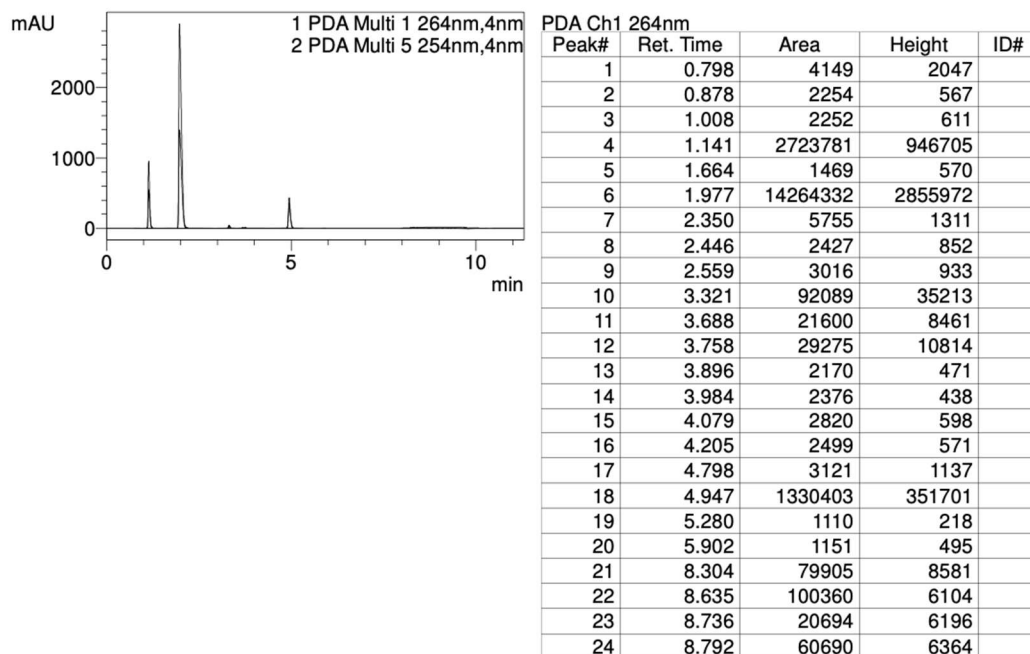

Figure S99 - HPLC spectra of the reaction used to obtain nucleoside **37**. R.T = 1.1 = nucleobase cytosine, 1.98 = nucleoside dC, 4.95 = Target nucleoside **37**.

## Display Report

### Analysis Info

Analysis Name D:\Data\Alans Data May 2022\STRA\_Otto Linden AS028T.d  
Method AAlansVGDtune280422\_low.m  
Sample Name Otto Linden AS028T  
Comment Otto Linden AS028T

Acquisition Date 5/27/2022 10:18:59 AM

Operator Bruker UK  
Instrument micrOTOF 8213750.10408

### Acquisition Parameter

|             |            |                      |          |                  |           |
|-------------|------------|----------------------|----------|------------------|-----------|
| Source Type | ESI        | Ion Polarity         | Positive | Set Nebulizer    | 0.4 Bar   |
| Focus       | Not active |                      |          | Set Dry Heater   | 200 °C    |
| Scan Begin  | 50 m/z     | Set Capillary        | 3000 V   | Set Dry Gas      | 4.0 l/min |
| Scan End    | 3000 m/z   | Set End Plate Offset | -500 V   | Set Divert Valve | Waste     |

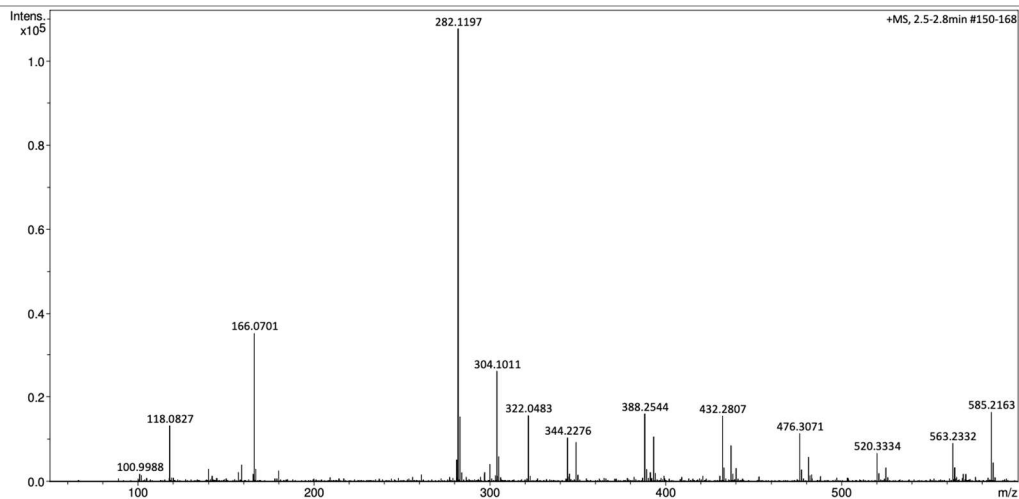

Bruker Compass DataAnalysis 4.1

printed: 5/27/2022 10:23:57 AM

by: Bruker UK

1 of 1

Figure S100 - HRMS of nucleoside 37

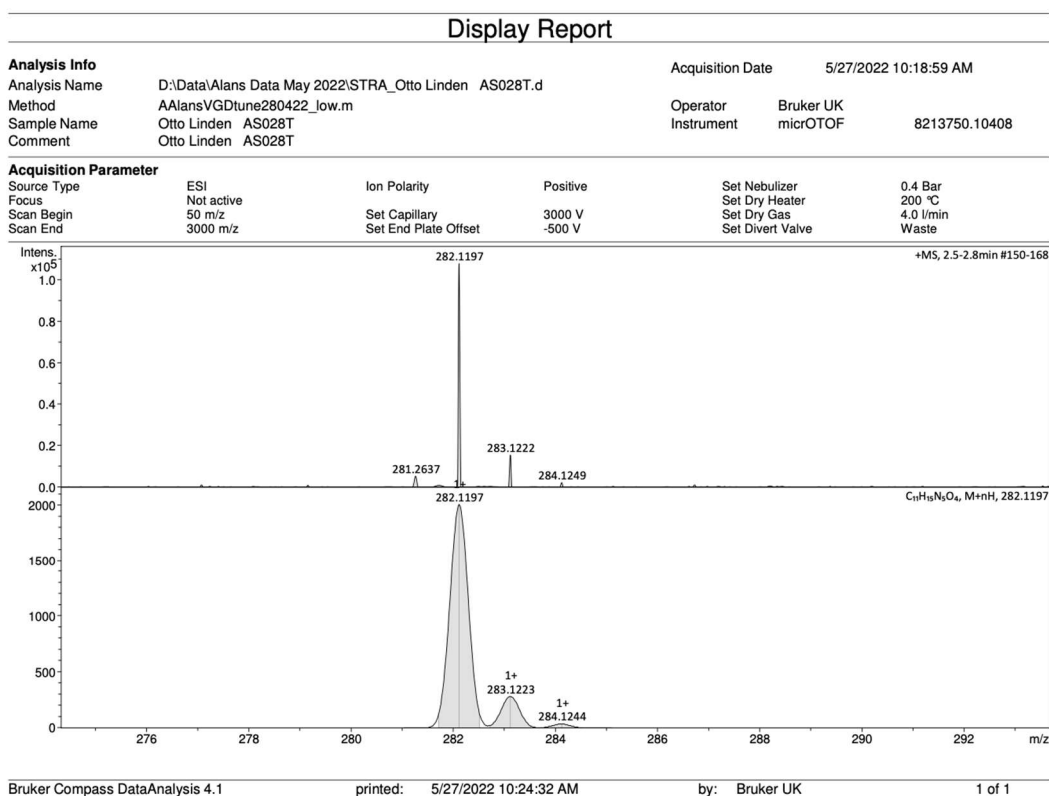

Figure S101 - HRMS to nucleoside **37**

## 2'-Deoxy-N2-Isobutyrylguanosine (**38**)

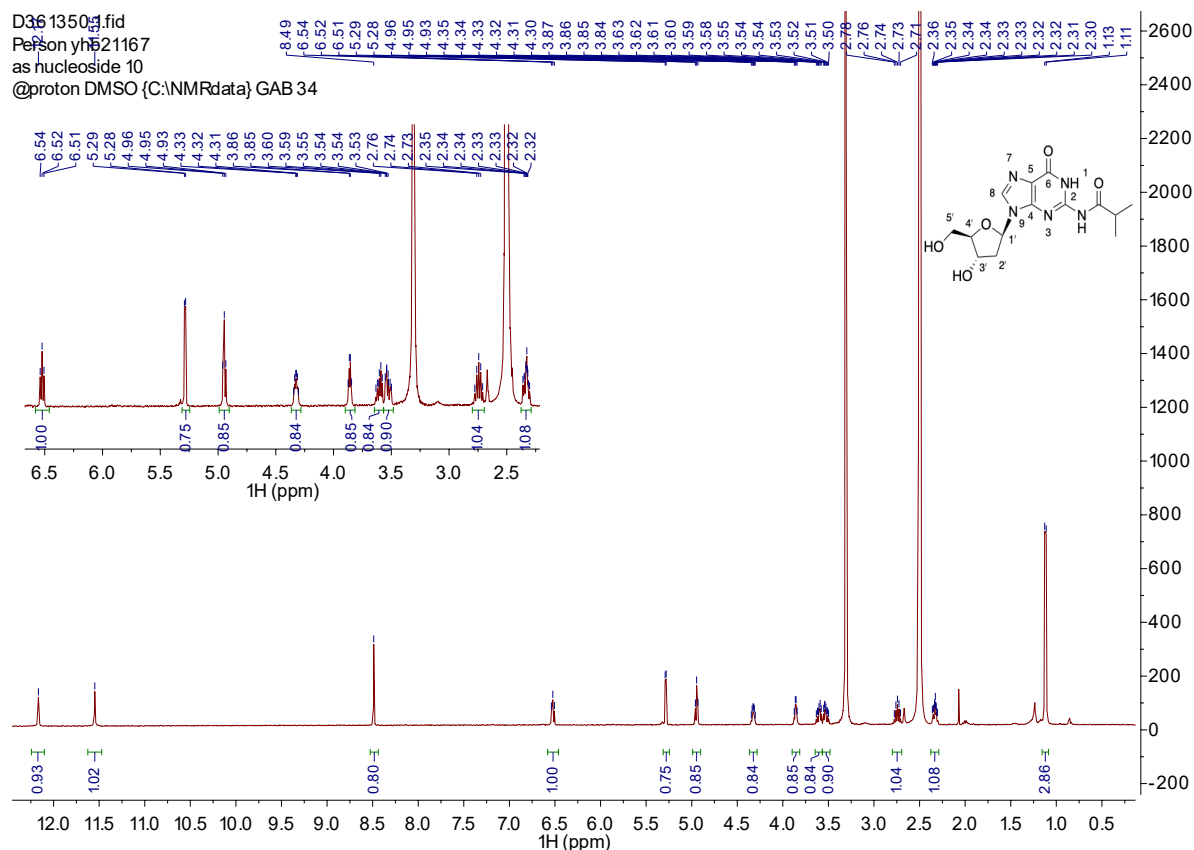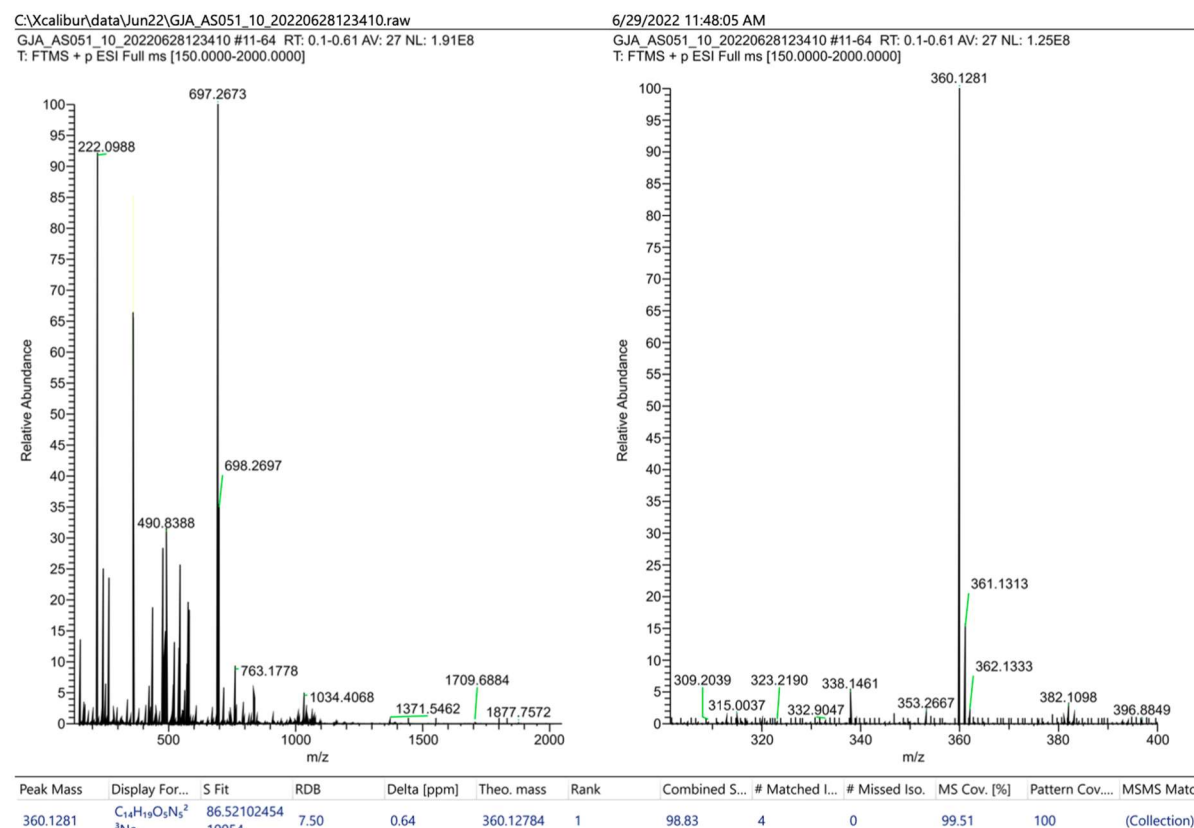

Sample Name : 10 RXN  
 Sample ID :  
 Data Filename : RXNS\_09062022\_012.lcd  
 Method Filename : Admir Trans glyco Run.lcm  
 Batch Filename : RXNS.lcb  
 Vial # : 1-57  
 Injection Volume : 10 uL  
 Date Acquired : 09/06/2022 19:15:35  
 Date Processed : 09/06/2022 19:26:55

Sample Type : Unknown  
 Acquired by : Shimadzu  
 Processed by : Shimadzu

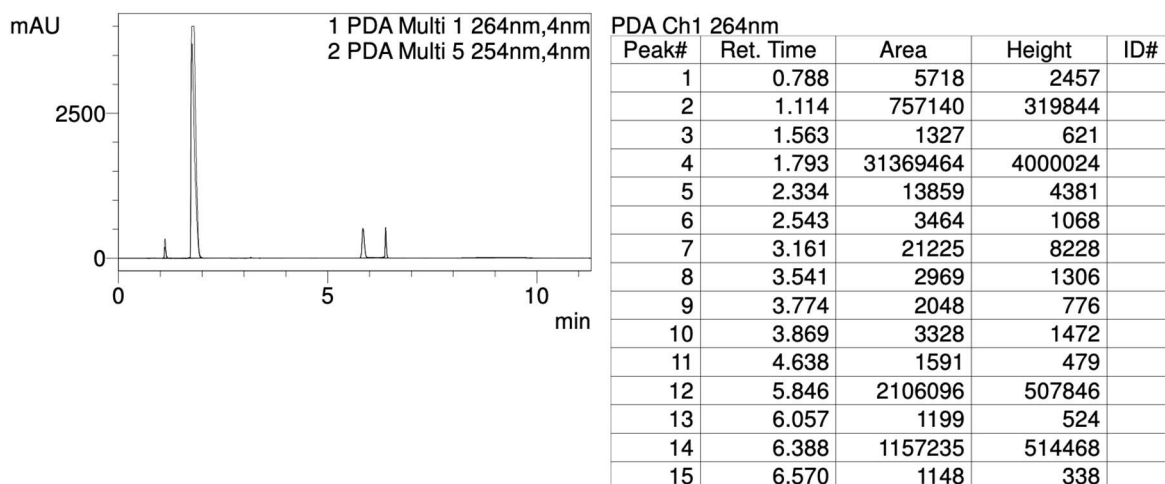

Figure S104 - HPLC spectrum of nucleoside **38**. R.T = 1.11 = released nucleobase cytosine 1.79 = nucleoside deoxycytidine dC, 5.84 = nucleobase 10, 6.39 = nucleoside **38**

## 2'-Deoxy-2-fluoroadenosine (39)

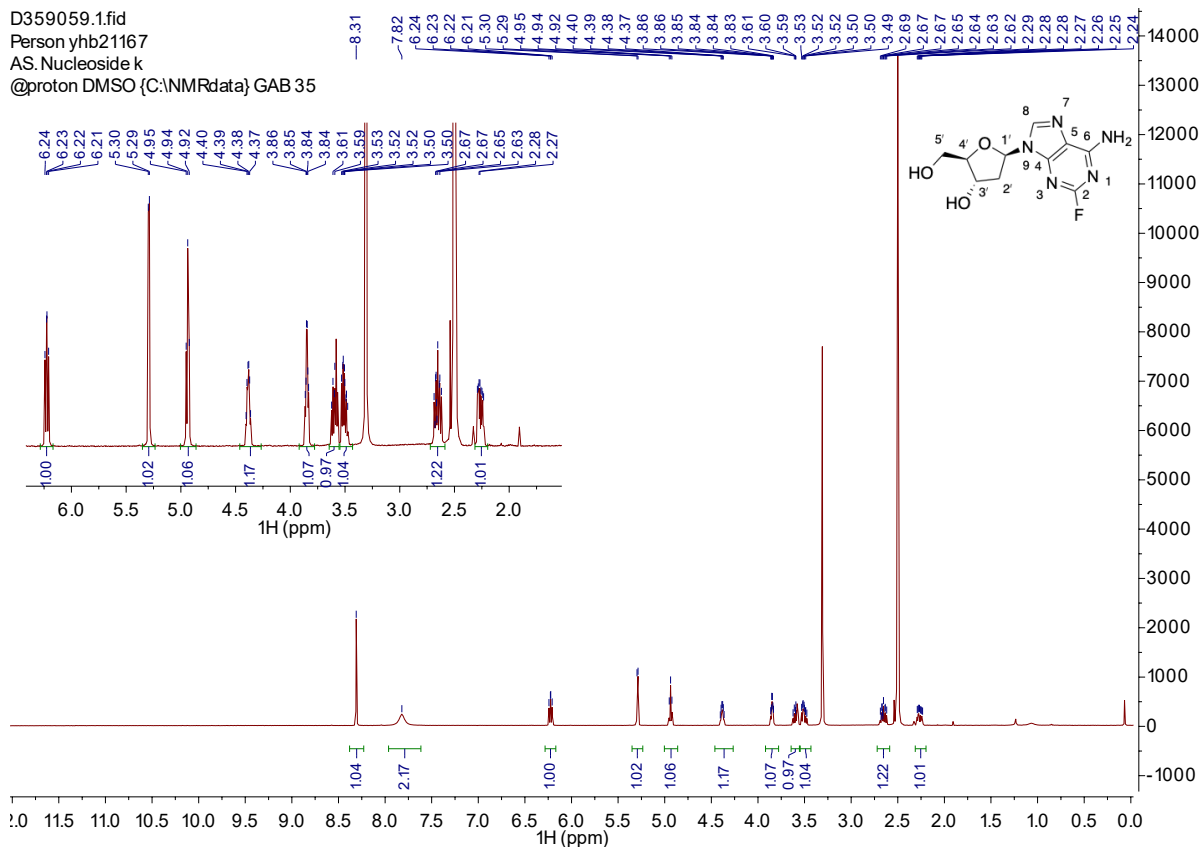

Figure S105 - <sup>1</sup>H NMR spectra of nucleoside **39**

D359059.2.fid  
 Person yhb21167  
 AS. Nucleoside k  
 13C\_@DMSO {C:\NMRdata} GAB 35

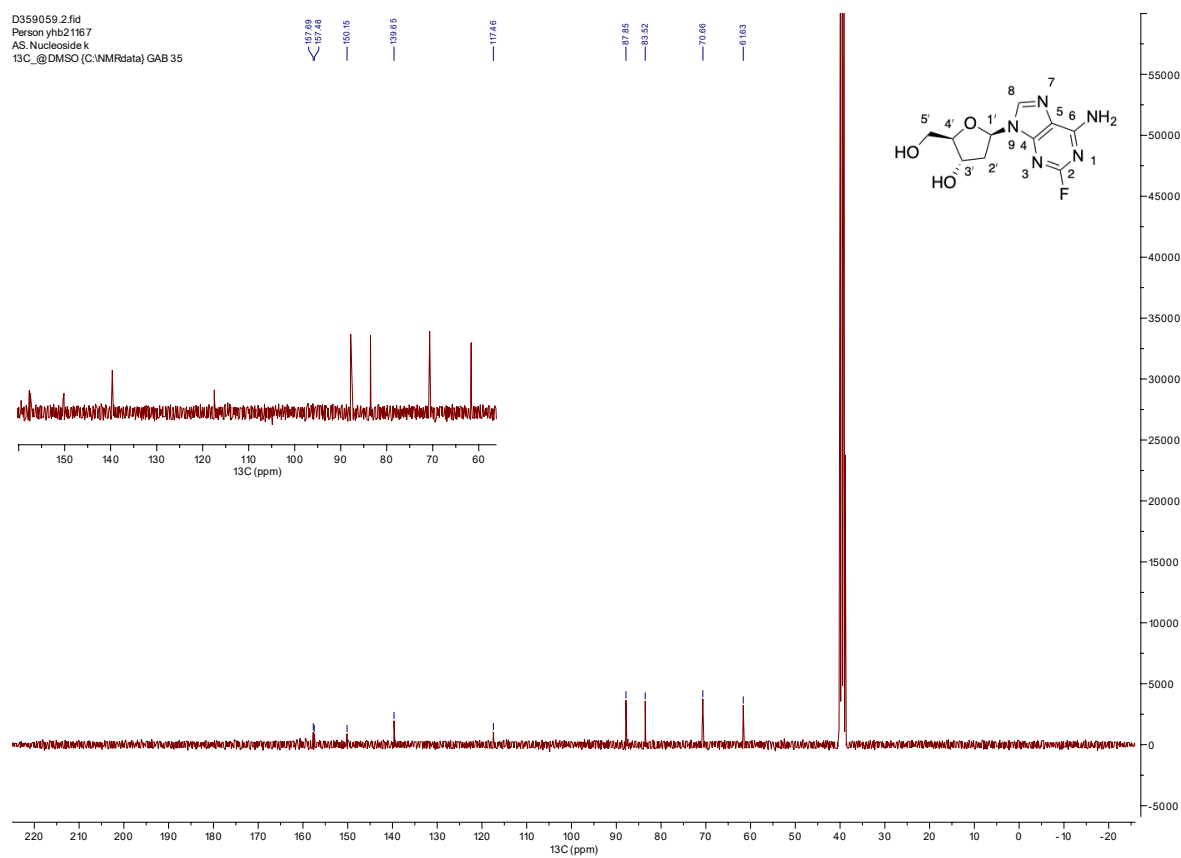

Figure S106 -  $^{13}\text{C}\{^1\text{H}\}$ -NMR spectra of nucleoside 39

D359700.1.fid  
 Person yhb21167  
 AS nucleoside K 19F  
 @19F DMSO {C:\NMRdata} GAB 83

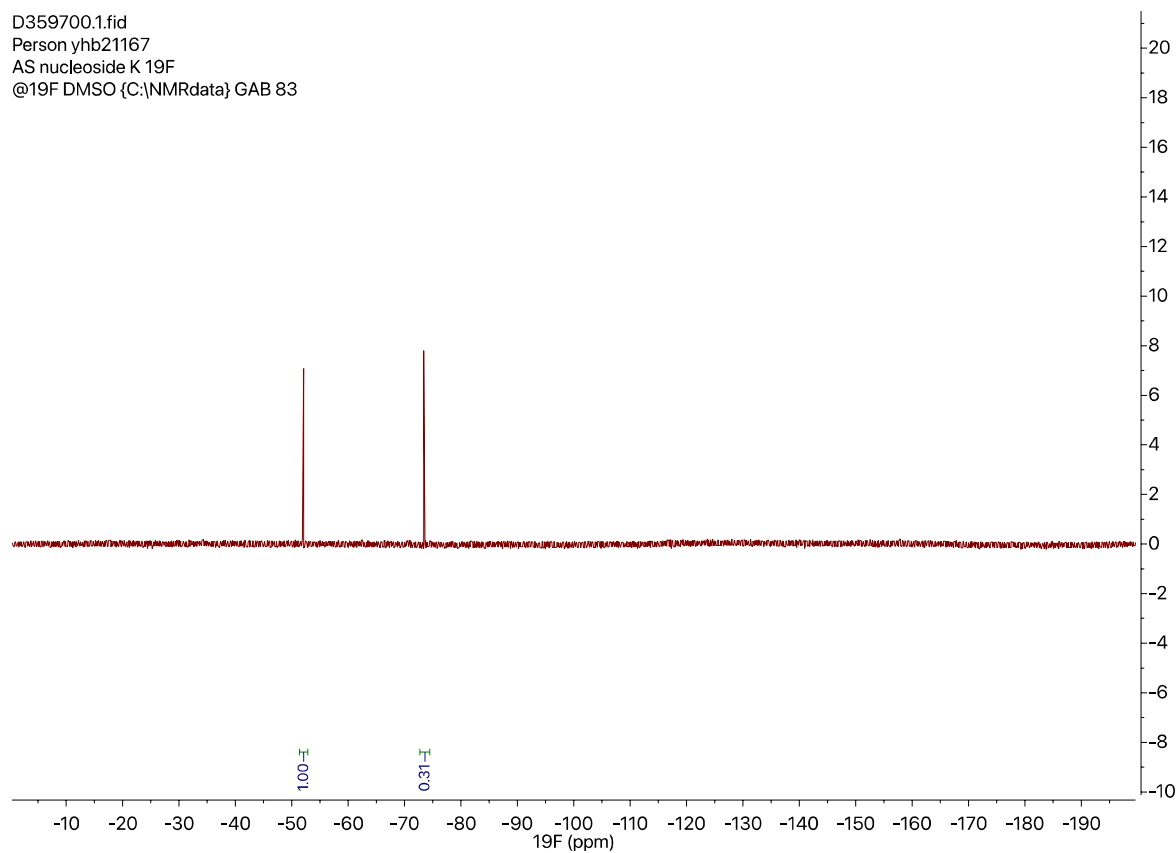

Figure S107 -  $^{19}\text{F}$  NMR of nucleoside 39

Sample Name : K RXN  
Sample ID :  
Data Filename : AS050 RXNS\_09062022\_003.lcd  
Method Filename : Admir Trans glyco Run.lcm  
Batch Filename : AS050 RXNS.lcb  
Vial # : 1-18  
Injection Volume : 10 uL  
Date Acquired : 09/06/2022 13:22:05  
Date Processed : 09/06/2022 13:33:26

Sample Type : Unknown  
Acquired by : Shimadzu  
Processed by : Shimadzu

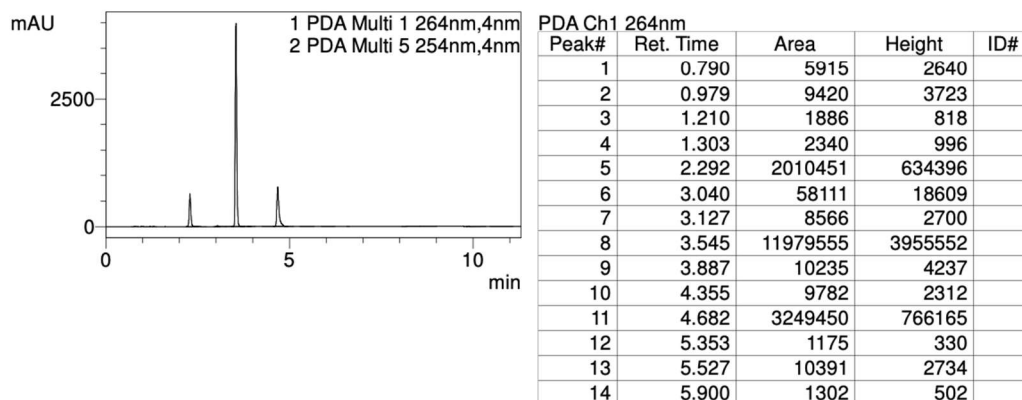

Figure S108 - HPLC trace for the reaction used to obtain nucleoside 39. R.T = 2.29 = nucleobase released thymine, 3.55 = nucleoside dT, 4.68 = nucleoside 39

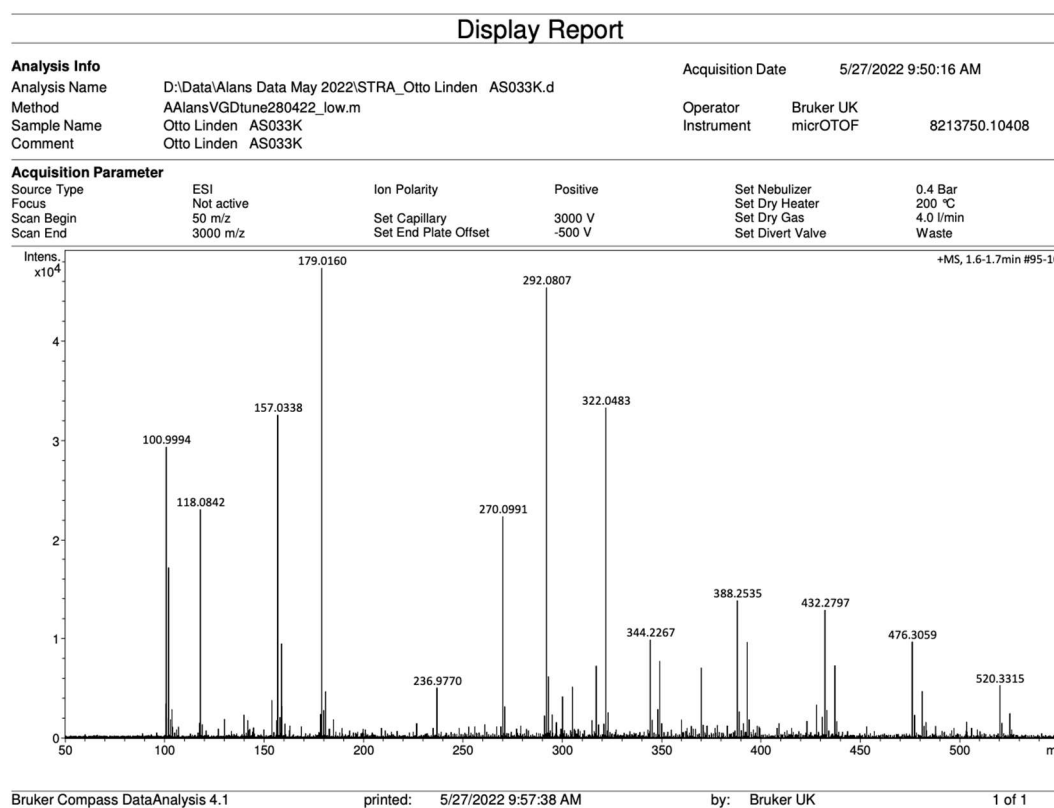

Figure S109 - HRMS of nucleoside 39

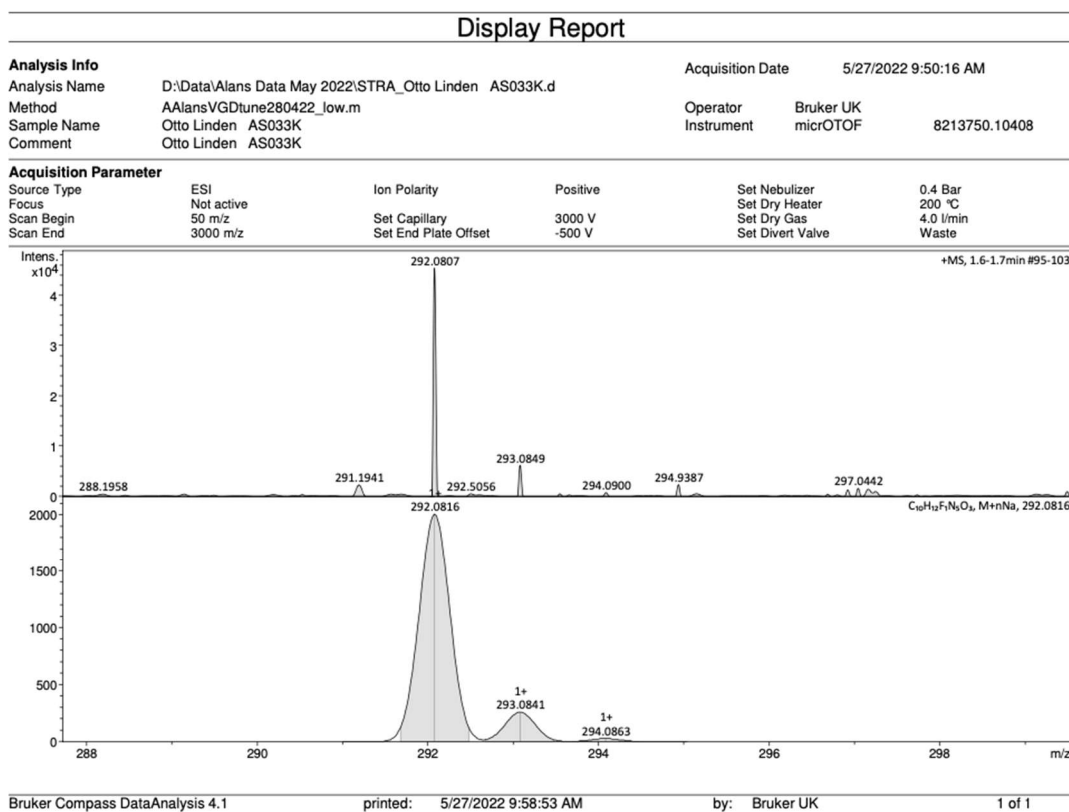

Figure S110 - HRMS of nucleoside 39

## 2'-Deoxy-2-aminoadenosine (40)



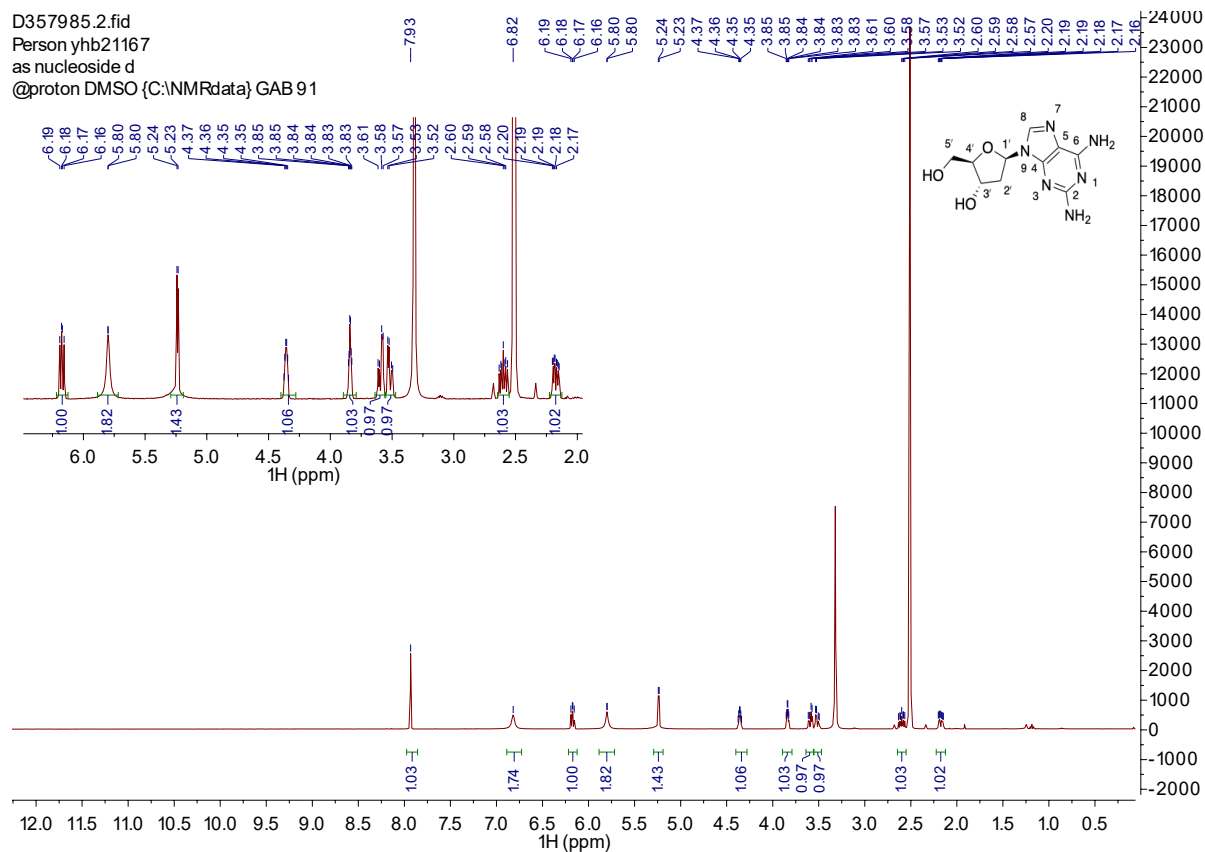

Figure S111 -  $^1\text{H}$  NMR spectra of nucleoside 40

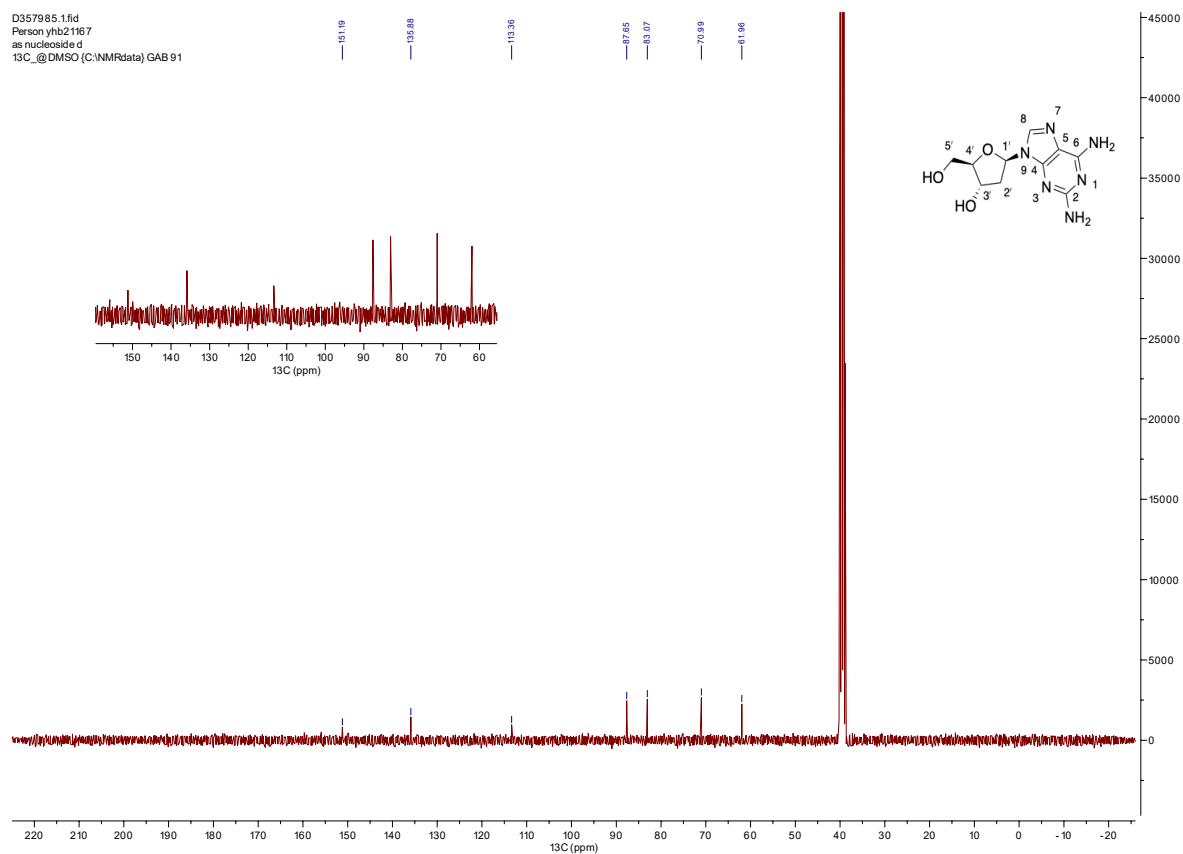

Figure S112 -  $^{13}\text{C}\{^1\text{H}\}$ -NMR spectra of nucleoside 40

Sample Name : as029 D  
 Sample ID :  
 Data Filename : BASE D\_02032022\_003.lcd  
 Method Filename : Admir Trans glyco Run.lcm  
 Batch Filename : BASE D.lcb  
 Vial # : 1-4  
 Injection Volume : 10 uL  
 Date Acquired : 02/03/2022 12:46:14  
 Date Processed : 02/03/2022 12:57:35

Sample Type : Unknown  
 Acquired by : Shimadzu  
 Processed by : Shimadzu

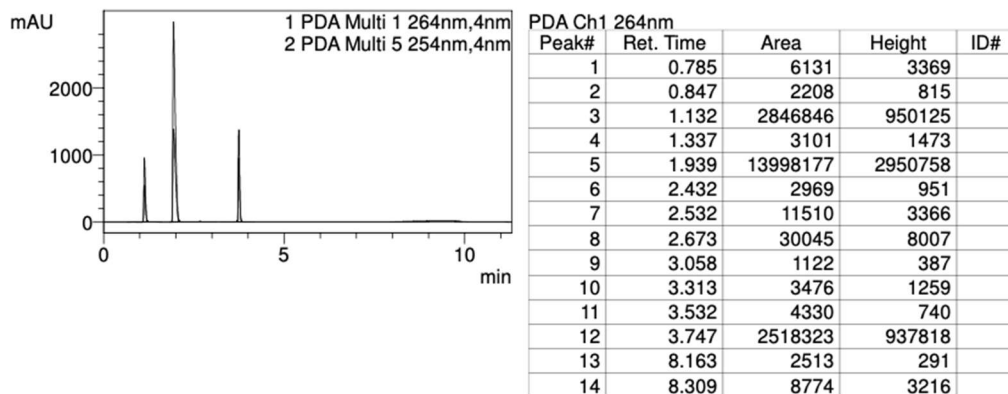

Figure S113 - HPLC trace of the reaction used to obtain nucleoside 40. R.T - 1.1 = nucleobase released cytosine, 1.9 = nucleoside dC, 3.75 = nucleoside 40

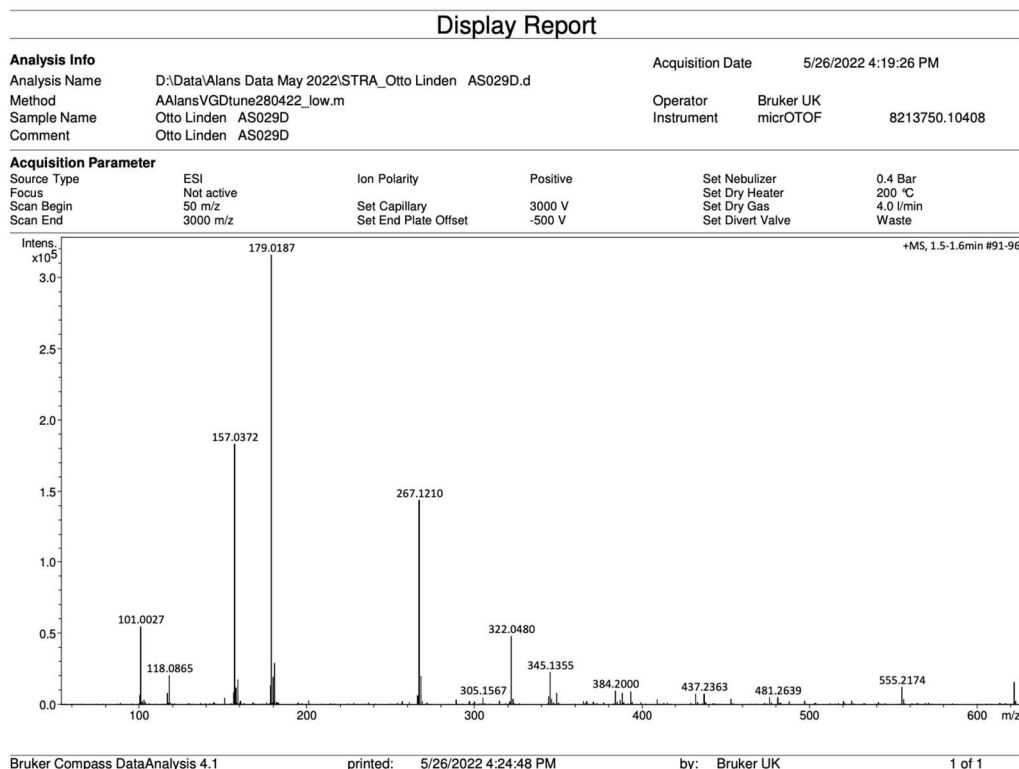

Figure S114 - HRMS of nucleoside 40

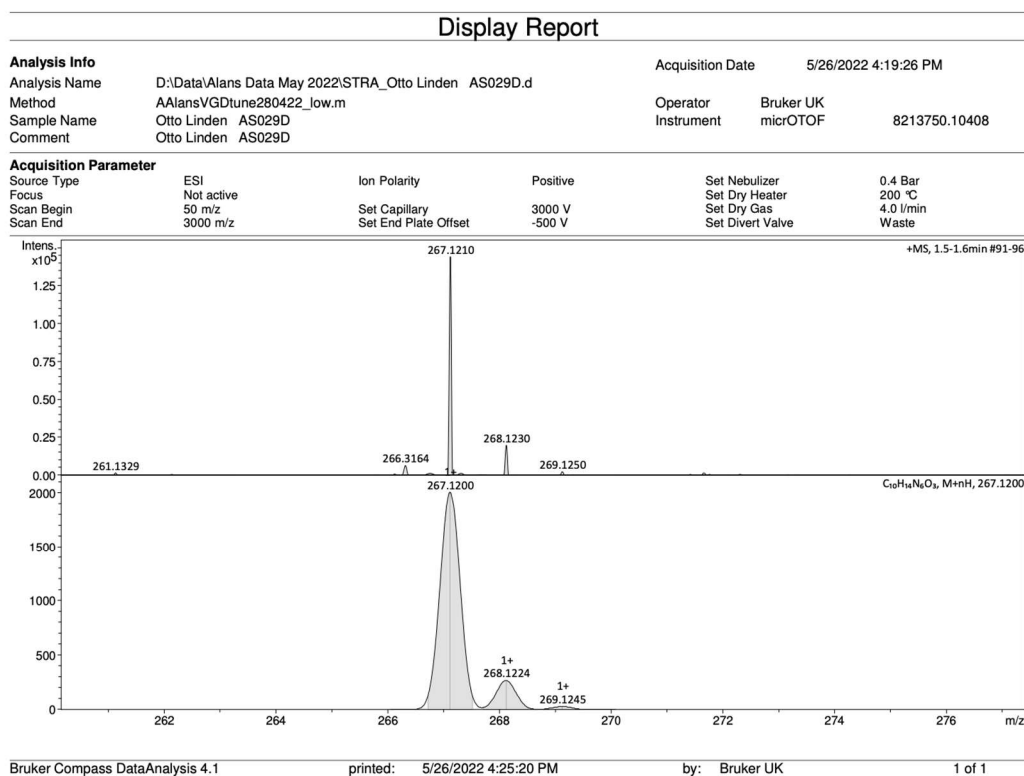

Figure S115 - HRMS of nucleoside 40

## 2'-Deoxy-6-methylpurine (41)

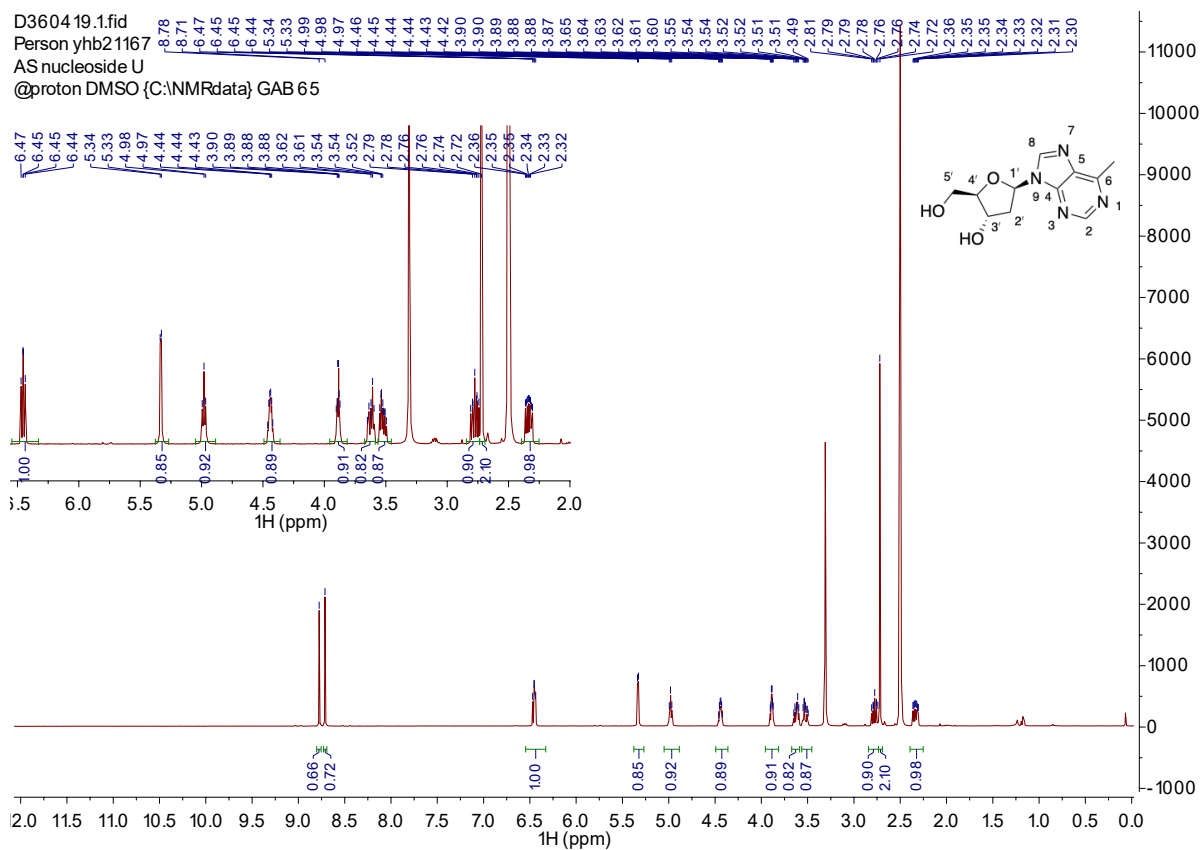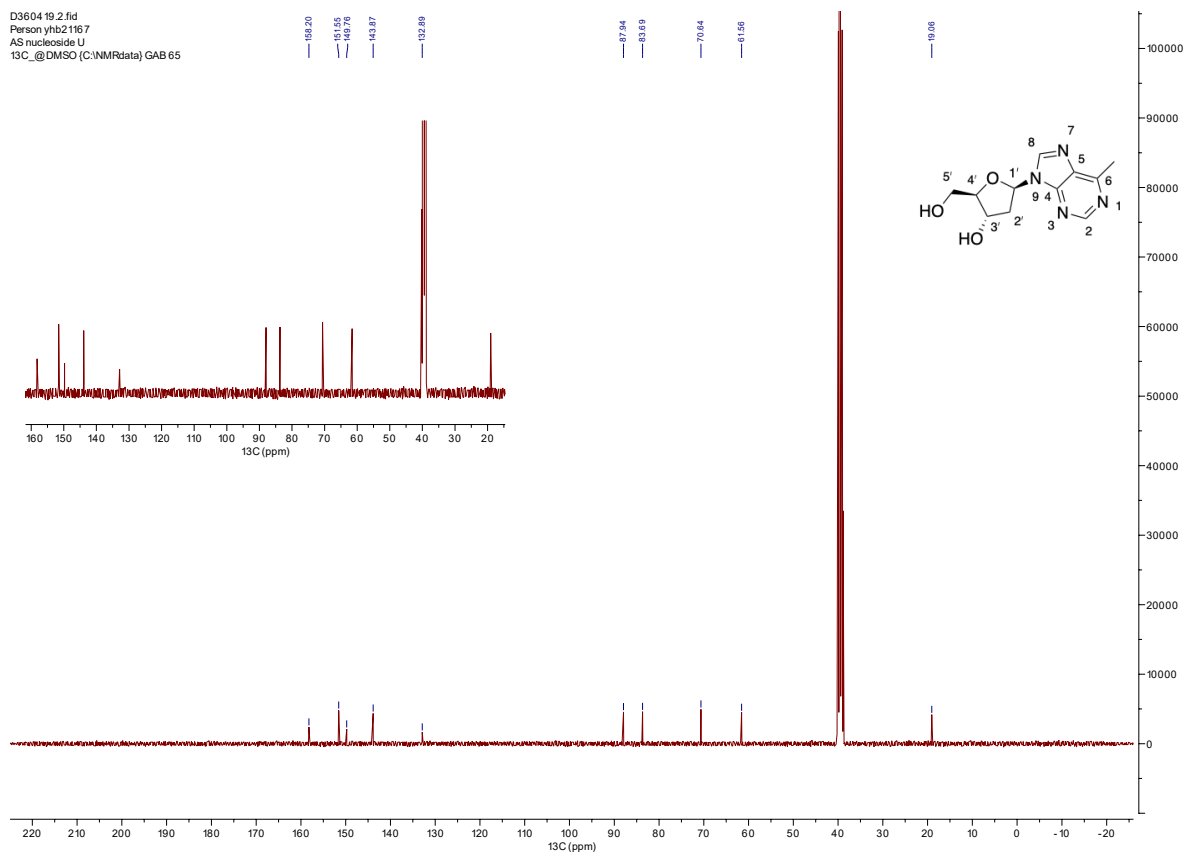

Sample Name : U RXN  
Sample ID :  
Data Filename : U RXN\_12052022\_002.lcd  
Method Filename : Admir Trans glyco Run.lcm  
Batch Filename : U RXN.lcb  
Vial # : 1-13  
Injection Volume : 10 µL  
Date Acquired : 12/05/2022 12:36:00  
Date Processed : 12/05/2022 12:47:20

Sample Type : Unknown

Acquired by : Shimadzu  
Processed by : Shimadzu

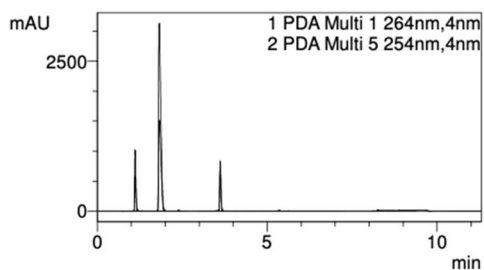

| Peak# | Ret. Time | Area     | Height  | ID# |
|-------|-----------|----------|---------|-----|
| 1     | 0.797     | 6153     | 2861    |     |
| 2     | 0.876     | 1451     | 612     |     |
| 3     | 1.116     | 2523698  | 996498  |     |
| 4     | 1.312     | 7654     | 3718    |     |
| 5     | 1.384     | 2007     | 953     |     |
| 6     | 1.494     | 1842     | 759     |     |
| 7     | 1.585     | 2071     | 395     |     |
| 8     | 1.824     | 14036019 | 3095295 |     |
| 9     | 2.395     | 44486    | 11092   |     |
| 10    | 2.560     | 1284     | 225     |     |
| 11    | 3.108     | 1240     | 208     |     |
| 12    | 3.214     | 4115     | 846     |     |
| 13    | 3.338     | 2769     | 662     |     |
| 14    | 3.506     | 19654    | 7273    |     |
| 15    | 3.621     | 1877739  | 823609  |     |
| 16    | 4.072     | 5334     | 1250    |     |
| 17    | 4.466     | 5755     | 1215    |     |
| 18    | 4.842     | 1404     | 335     |     |
| 19    | 4.944     | 1144     | 178     |     |
| 20    | 5.166     | 2982     | 328     |     |
| 21    | 5.351     | 46774    | 10025   |     |
| 22    | 5.633     | 7324     | 1652    |     |
| 23    | 5.955     | 3658     | 1485    |     |
| 24    | 6.043     | 1471     | 420     |     |
| 25    | 6.135     | 1483     | 468     |     |
| 26    | 6.281     | 9954     | 2656    |     |

Figure S118 - HPLC trace of the reaction to obtain nucleoside 41. R.T = 1.12 = Nucleobase cytosine, 1.82 = nucleoside dC, 3.62 = nucleoside 41

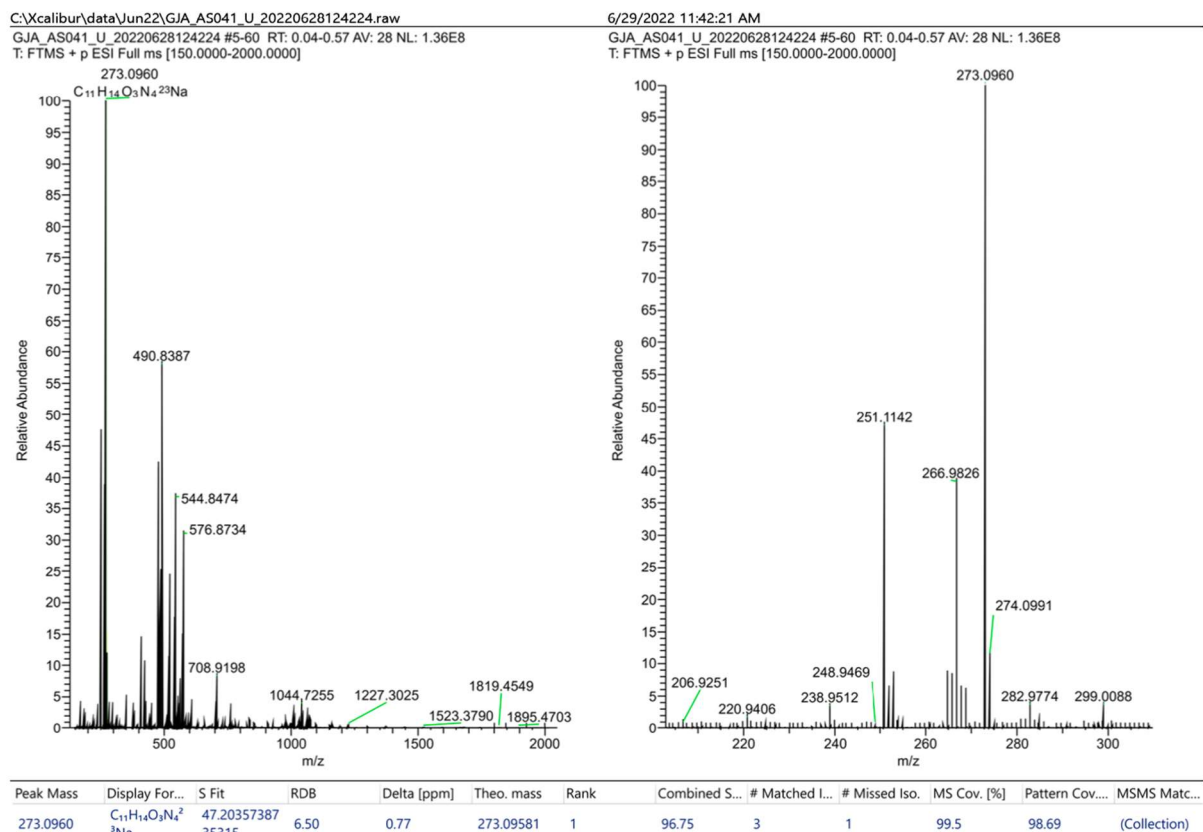

Figure S119 - HRMS trace of the nucleoside 41 sodium adduct.

## 2'-Deoxy-6-chloropurine (42)

D362065.1.fid

Person yhb21167

as nucleoside a

@proton DMSO {C:\NMRdata} GAB 46

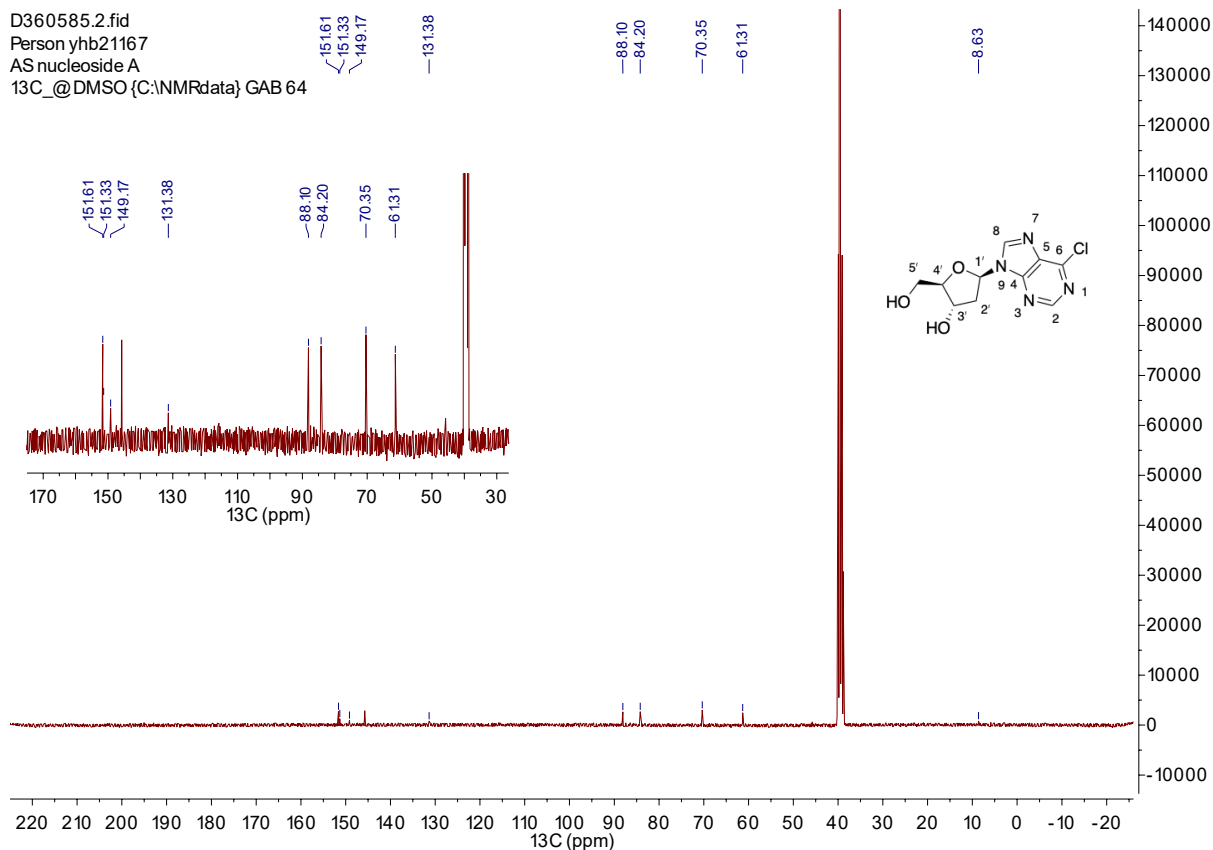

Sample Name : A RXN  
 Sample ID :  
 Data Filename : RXNS AND STDS\_22042022\_004.lcd  
 Method Filename : Admir Trans glyco Run.lcm  
 Batch Filename : RXNS AND STDS.lcb  
 Vial # : 1-64  
 Injection Volume : 10 uL  
 Date Acquired : 22/04/2022 11:31:32  
 Date Processed : 22/04/2022 11:42:53

Sample Type : Unknown  
 Acquired by : Shimadzu  
 Processed by : Shimadzu

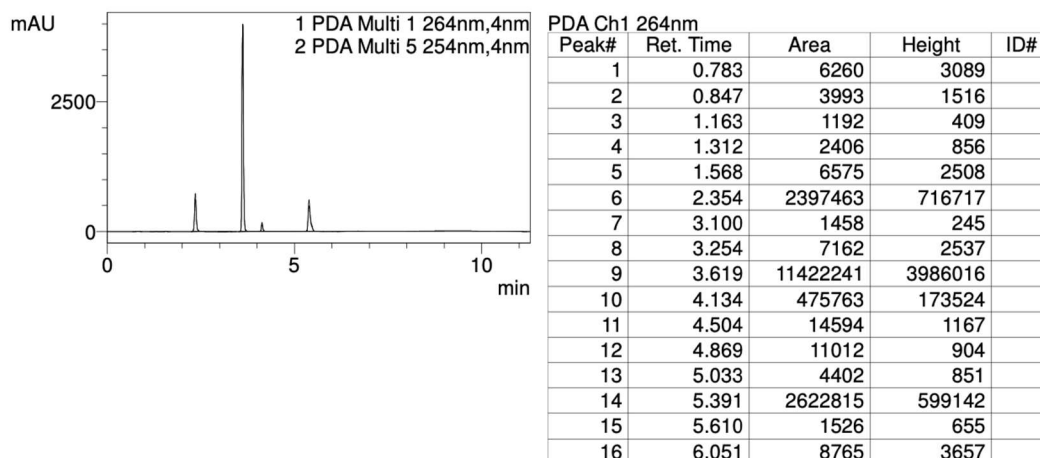

Figure S122 - HPLC trace used in the reaction where nucleoside 42 is obtained.  $R.T = 2.35 = \text{thymine}$ ,  $3.62 = dT$ ,  $4.13 = \text{starting material nucleobase A}$ ,  $5.39 = \text{nucleoside 42}$ .

## Display Report

### Analysis Info

Analysis Name D:\Data\Alans Data May 2022\STRA\_Otto Linden AS037A.d  
Method AAlansVGDtune280422\_low.m  
Sample Name Otto Linden AS037A  
Comment Otto Linden AS037A

Acquisition Date 5/27/2022 10:03:57 AM

Operator Bruker UK  
Instrument micrOTOF 8213750.10408

### Acquisition Parameter

|             |            |                      |          |                  |           |
|-------------|------------|----------------------|----------|------------------|-----------|
| Source Type | ESI        | Ion Polarity         | Positive | Set Nebulizer    | 0.4 Bar   |
| Focus       | Not active |                      |          | Set Dry Heater   | 200 °C    |
| Scan Begin  | 50 m/z     | Set Capillary        | 3000 V   | Set Dry Gas      | 4.0 l/min |
| Scan End    | 3000 m/z   | Set End Plate Offset | -500 V   | Set Divert Valve | Waste     |

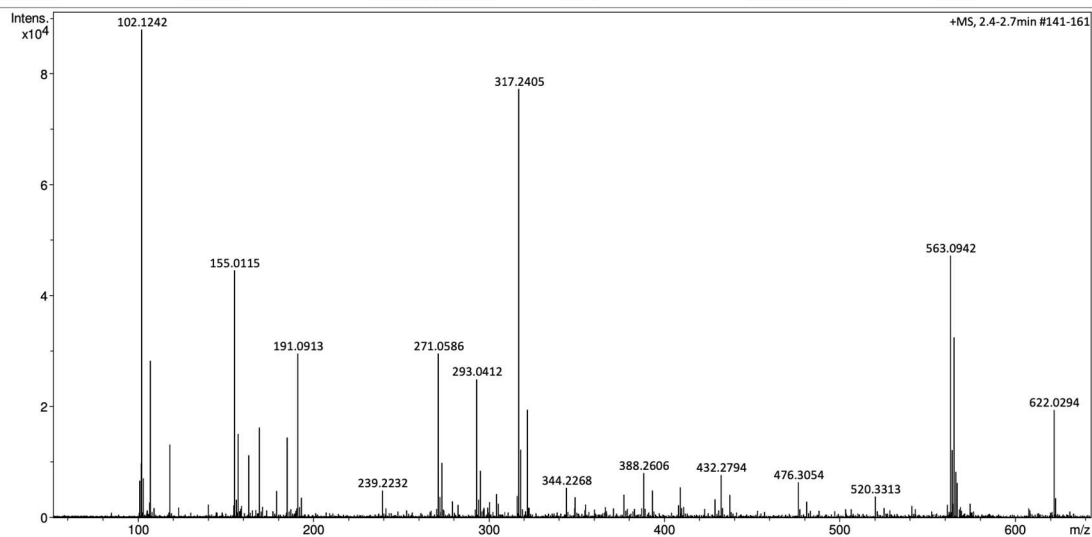

Bruker Compass DataAnalysis 4.1

printed: 5/27/2022 10:11:37 AM

by: Bruker UK

1 of 1

Figure S123 - HRMS of nucleoside 42.



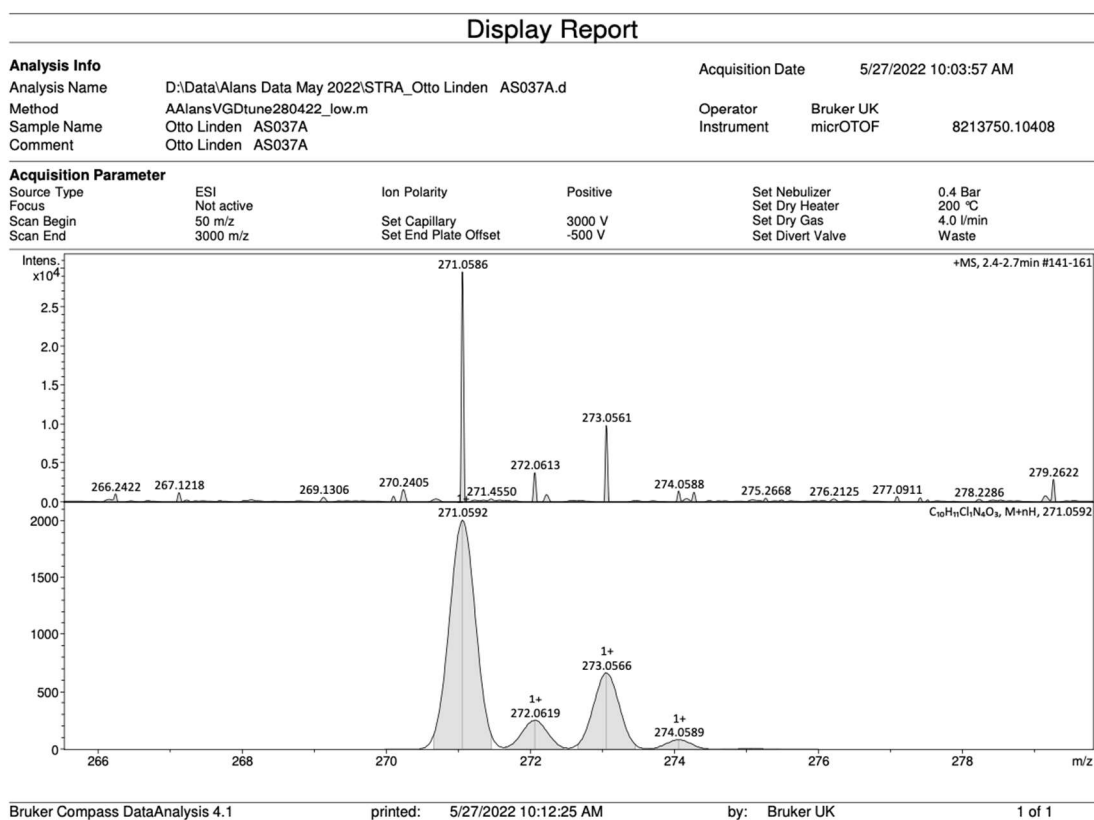

Figure S124 - HRMS of nucleoside 42.

## 2'-Deoxy-6-methyladenosine (43)

[illegible]

D357984 2.fid  
Person yhb21167  
as nucleoside f  
13C\_@DMSO (C:\NMR\data) GAB 90

152.35  
139.22  
87.99  
83.92  
70.98  
61.89

70000  
65000  
60000  
55000  
50000  
45000  
40000  
35000  
30000  
25000  
20000  
15000  
10000  
5000  
0  
-5000

HO  
HO  
5'  
4'  
3'  
2'  
1'  
N  
8  
7  
6  
5  
4  
3  
2  
1

13C (ppm)

220  
210  
200  
190  
180  
170  
160  
150  
140  
130  
120  
110  
100  
90  
80  
70  
60  
50  
40  
30  
20  
10  
0  
-10  
-20

13C (ppm)

CN1C=NC2=C1N=CN2[C@H]3O[C@H](CO)[C@@H](O)[C@H]3O

Sample Name : F AS028  
 Sample ID :  
 Data Filename : REACTIONS\_24022022\_004.lcd  
 Method Filename : Admir Trans glyco Run.lcm  
 Batch Filename : REACTIONS.lcb  
 Vial # : 1-4  
 Injection Volume : 10 uL  
 Date Acquired : 24/02/2022 15:39:08  
 Date Processed : 24/02/2022 15:50:28

Sample Type : Unknown  
 Acquired by : Shimadzu  
 Processed by : Shimadzu

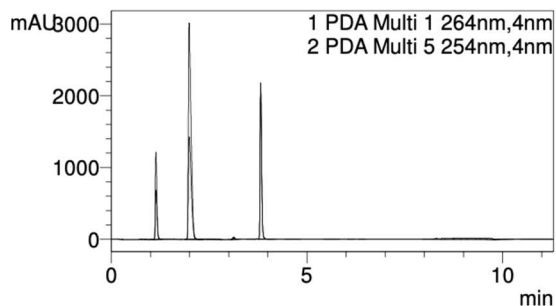

| Peak# | Ret. Time | Area     | Height  | ID# |
|-------|-----------|----------|---------|-----|
| 1     | 0.798     | 4296     | 2170    |     |
| 2     | 0.878     | 2284     | 576     |     |
| 3     | 1.008     | 2535     | 649     |     |
| 4     | 1.142     | 3333757  | 1194309 |     |
| 5     | 1.991     | 14345579 | 2990956 |     |
| 6     | 2.458     | 4410     | 1354    |     |
| 7     | 2.568     | 4627     | 1327    |     |
| 8     | 3.129     | 109524   | 32941   |     |
| 9     | 3.719     | 26537    | 8597    |     |
| 10    | 3.821     | 6109263  | 2167997 |     |
| 11    | 4.495     | 1334     | 350     |     |
| 12    | 4.712     | 18284    | 5320    |     |
| 13    | 5.499     | 12696    | 2787    |     |

Figure S127 - HPLC trace for the reaction used to obtain Nucleoside 43.  $R.T = 1.1$  = nucleobase cytosine released, 1.99 = nucleoside dC, 3.13 = nucleobase F, 3.82 = Nucleoside 43

### Display Report

#### Analysis Info

Analysis Name : D:\Data\Alans Data May 2022\STRA\_Otto Linden AS028F.d  
 Method : AAlansVGDtune280422\_low.m  
 Sample Name : Otto Linden AS028F  
 Comment : Otto Linden AS028F

Acquisition Date : 5/26/2022 4:06:32 PM

Operator : Bruker UK  
 Instrument : micrOTOF  
 8213750.10408

#### Acquisition Parameter

Source Type : ESI  
 Focus : Not active  
 Scan Begin : 50 m/z  
 Scan End : 3000 m/z  
 Ion Polarity : Positive  
 Set Capillary : 3000 V  
 Set End Plate Offset : -500 V  
 Set Nebulizer : 0.4 Bar  
 Set Dry Heater : 200 °C  
 Set Dry Gas : 4.0 l/min  
 Set Divert Valve : Waste

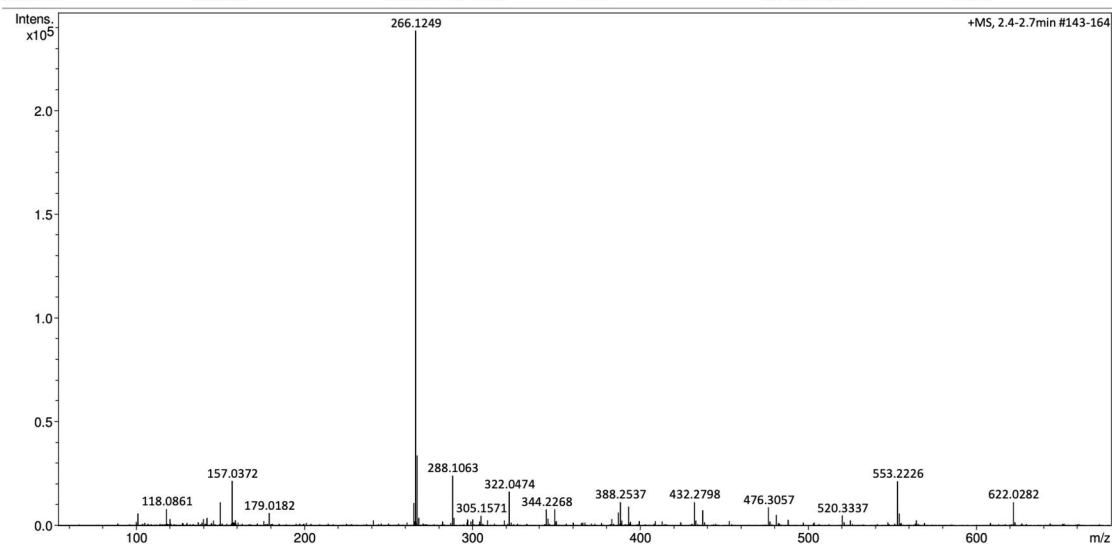

Bruker Compass DataAnalysis 4.1

printed: 5/26/2022 4:11:22 PM

by: Bruker UK

1 of 1

Figure S128 - HRMS of Nucleoside 43

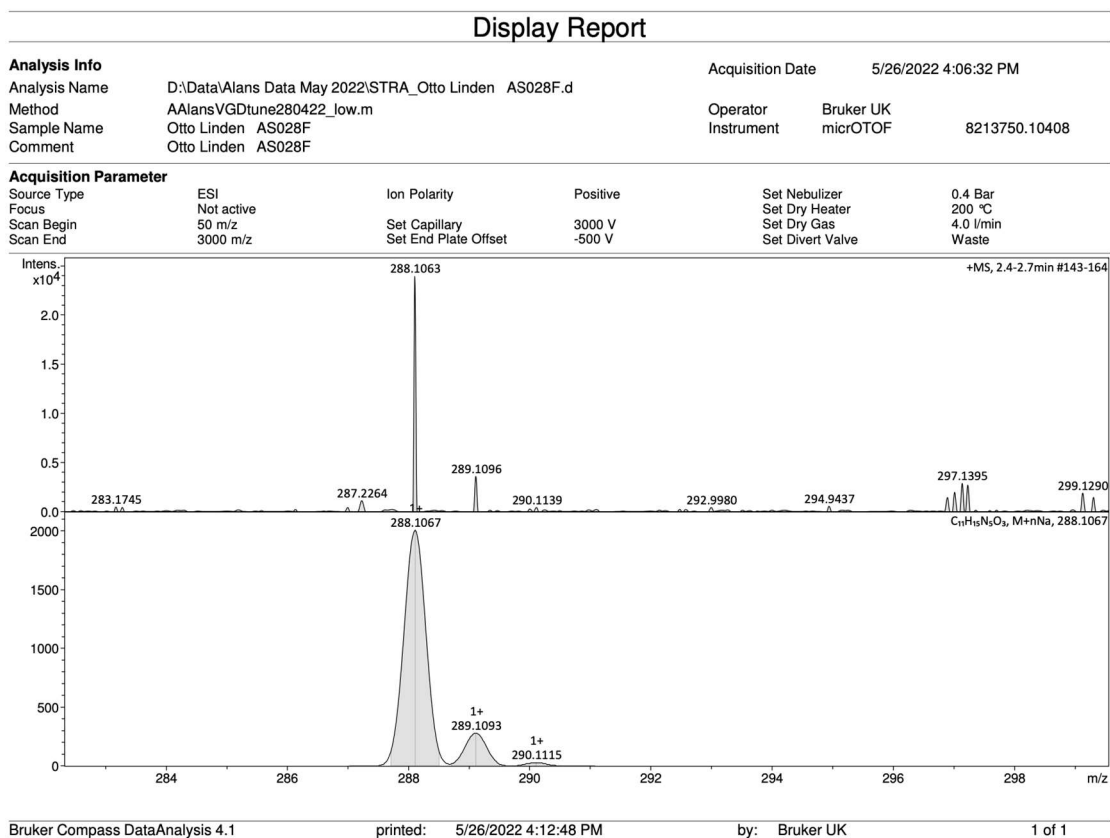

Figure S129 - HRMS of Nucleoside 43

## 2'-Deoxy-N6-benzoyladenosine (44)

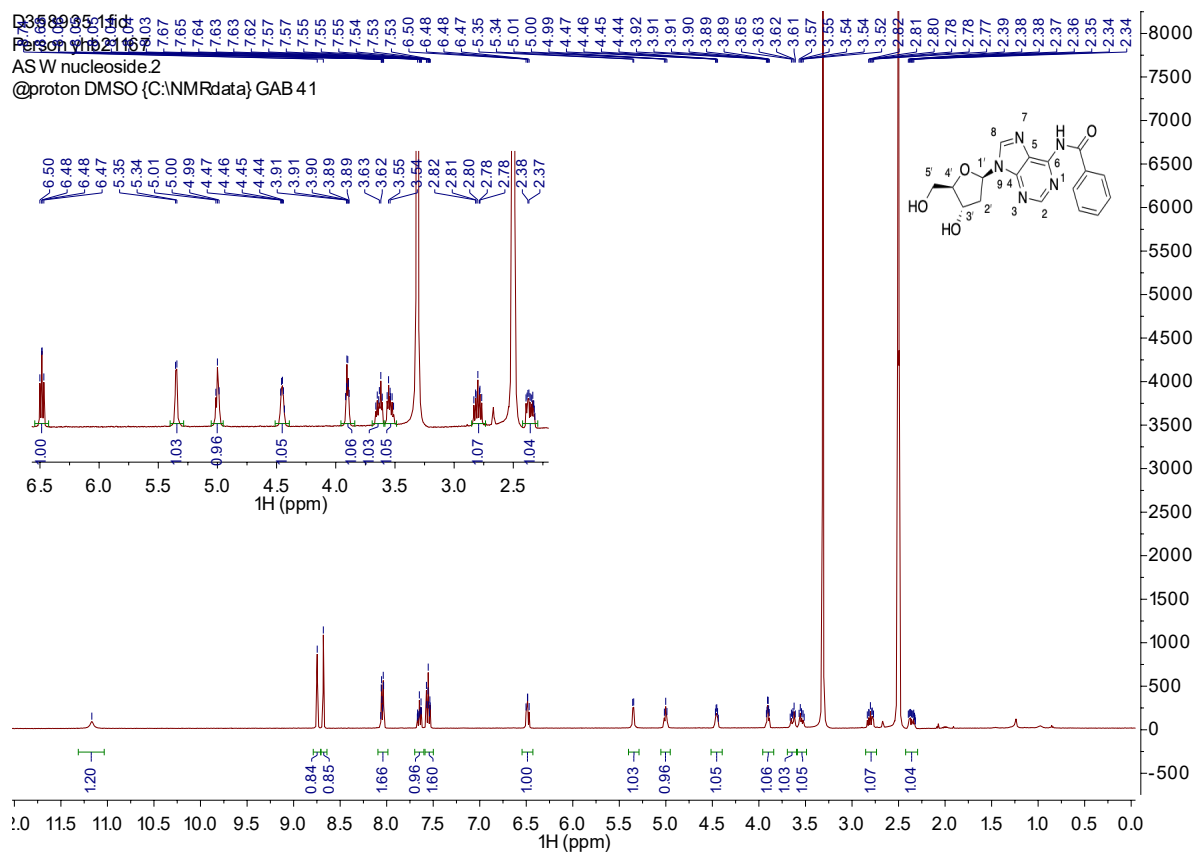

Figure S130 -  $^1\text{H}$  NMR spectra of nucleoside 44

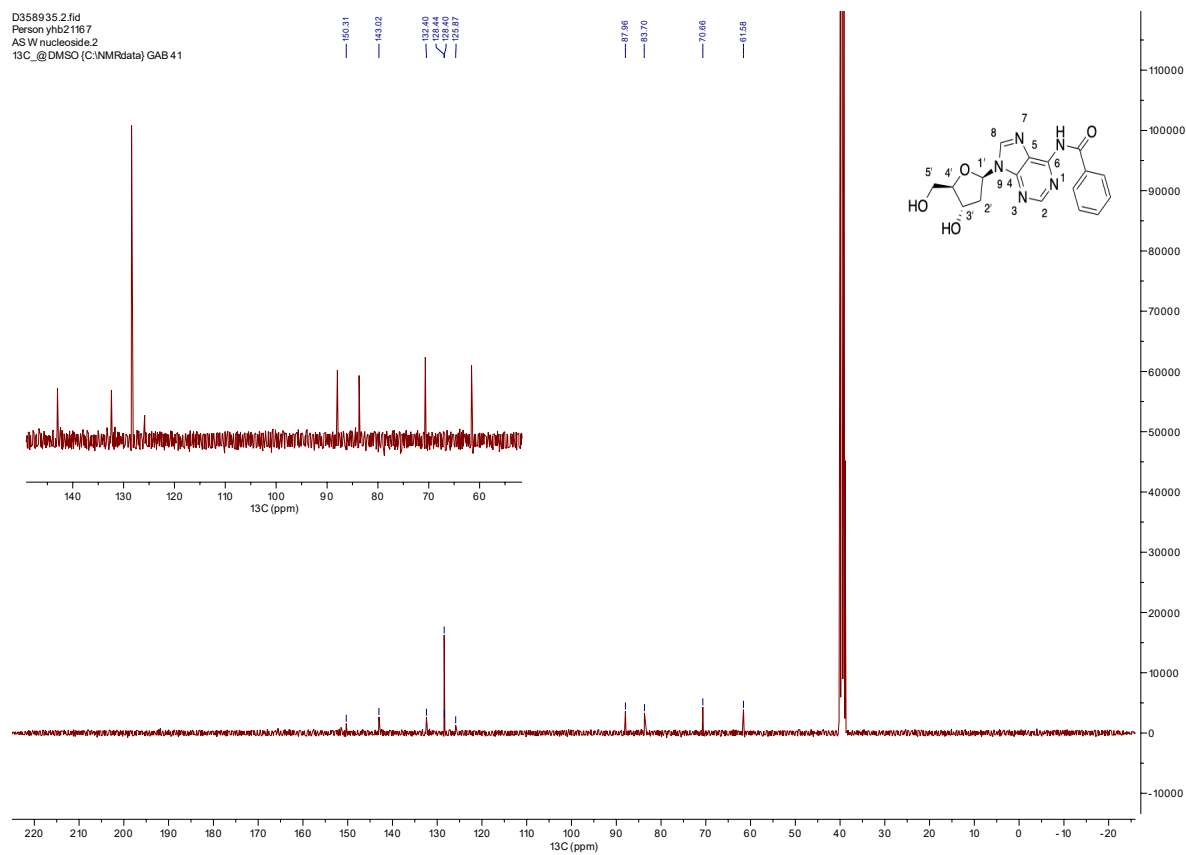

Figure S131 -  $^{13}\text{C}\{^1\text{H}\}$ -NMR spectra of nucleoside 44

Sample Name : as029 w  
Sample ID :  
Data Filename : base w\_02032022\_003.lcd  
Method Filename : Admir Trans glyco Run.lcm  
Batch Filename : base w.lcb  
Vial # : 1-22  
Injection Volume : 10 uL  
Date Acquired : 02/03/2022 16:18:36  
Date Processed : 02/03/2022 16:29:56  
Sample Type : Unknown  
Acquired by : Shimadzu  
Processed by : Shimadzu

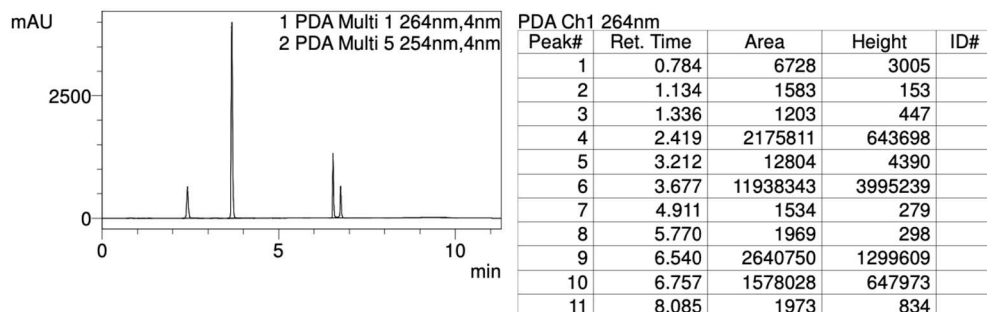

Figure S132 - HPLC trace of the reaction used to obtain nucleoside 44.  $R.T = 2.42 = \text{nucleobase thymine}$ ,  $3.68 = dT$ ,  $6.54 = \text{nucleoside 44}$ ,  $6.76 = \text{starting material nucleobase}$

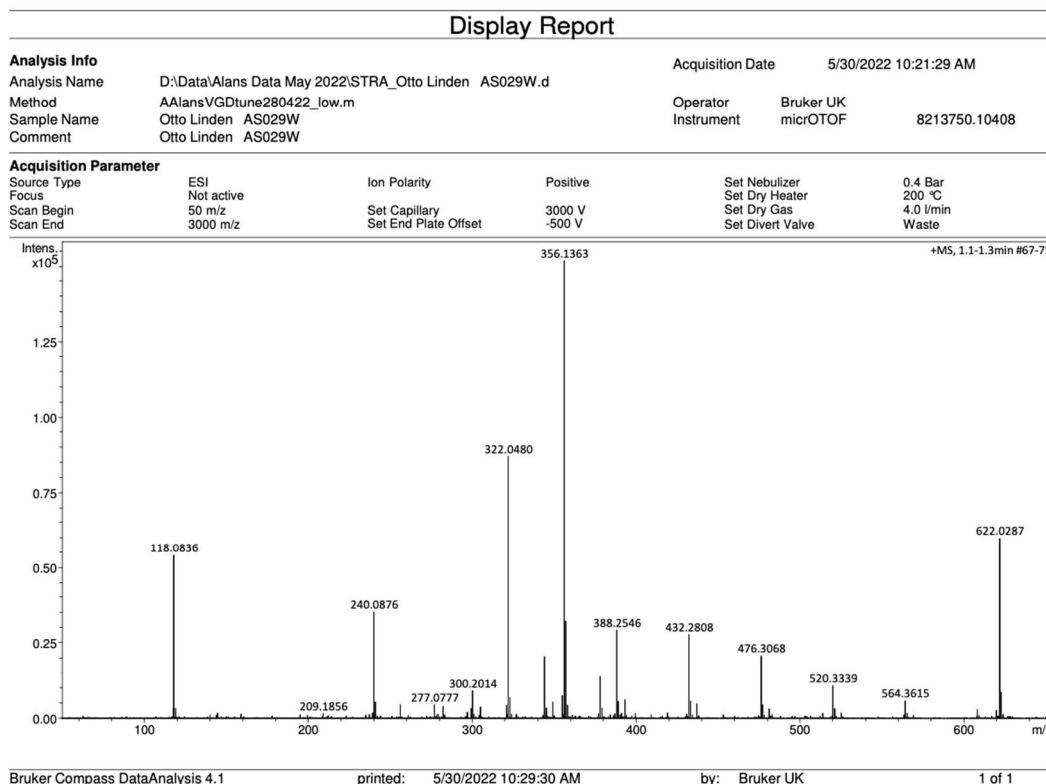

Figure S133 - HRMS of nucleoside 44

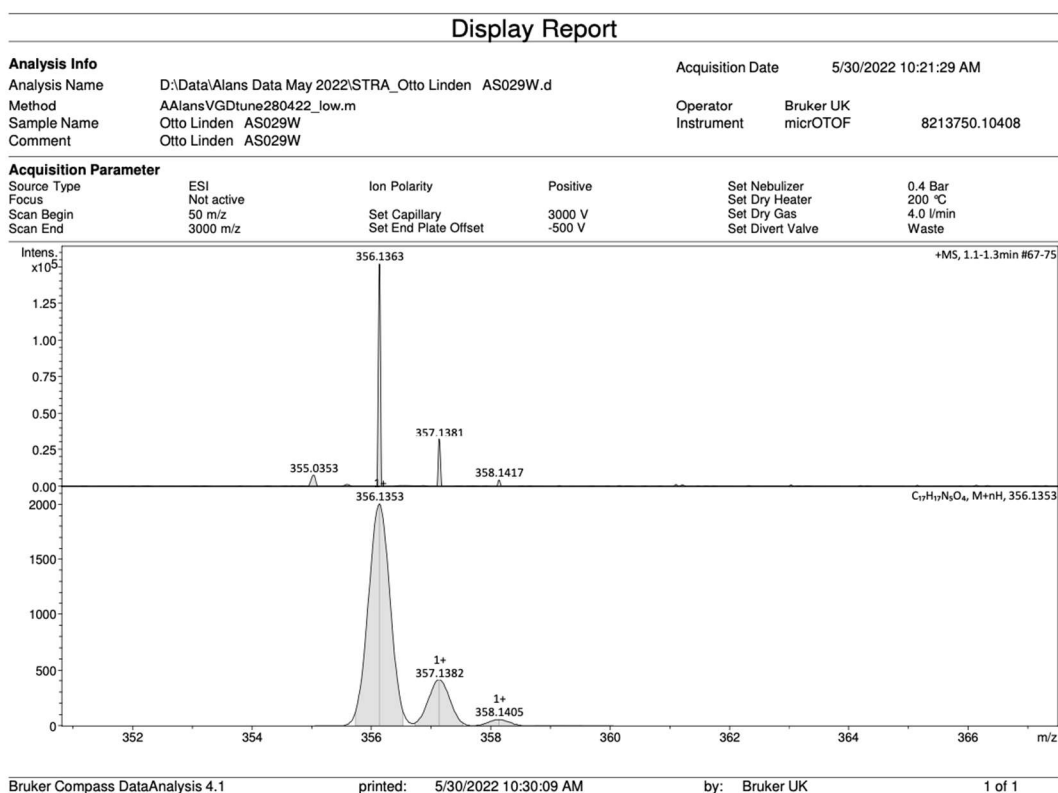

Figure S134 - HRMS of nucleoside 44

## 2'-Deoxy-deaza-2-bromopurine (45)

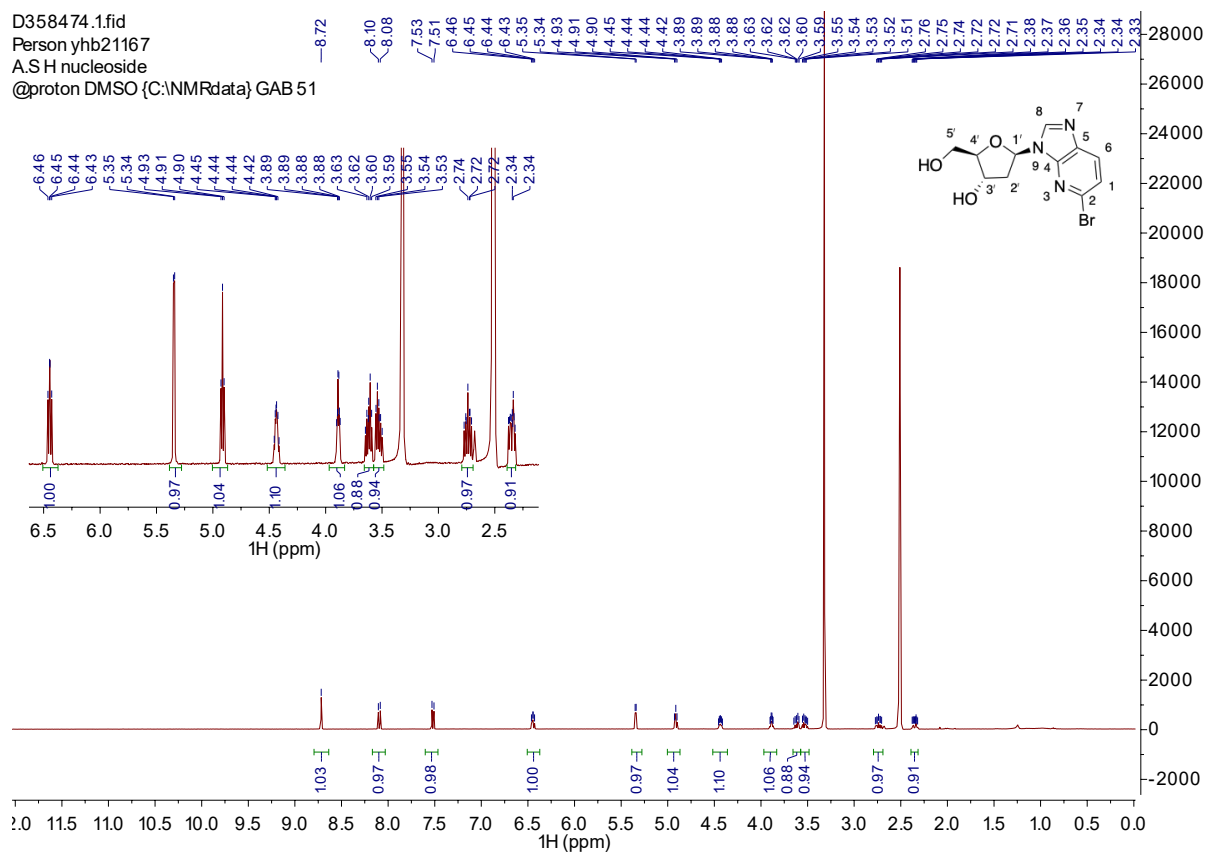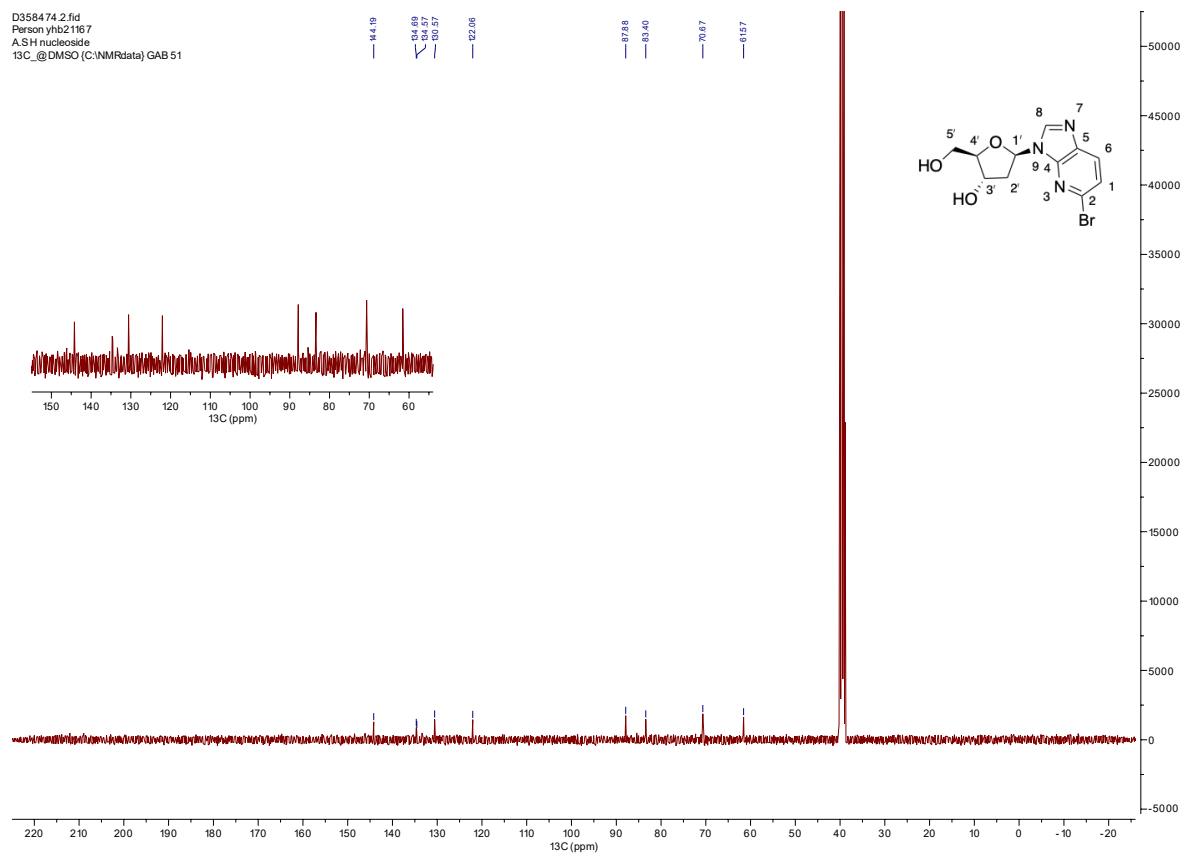



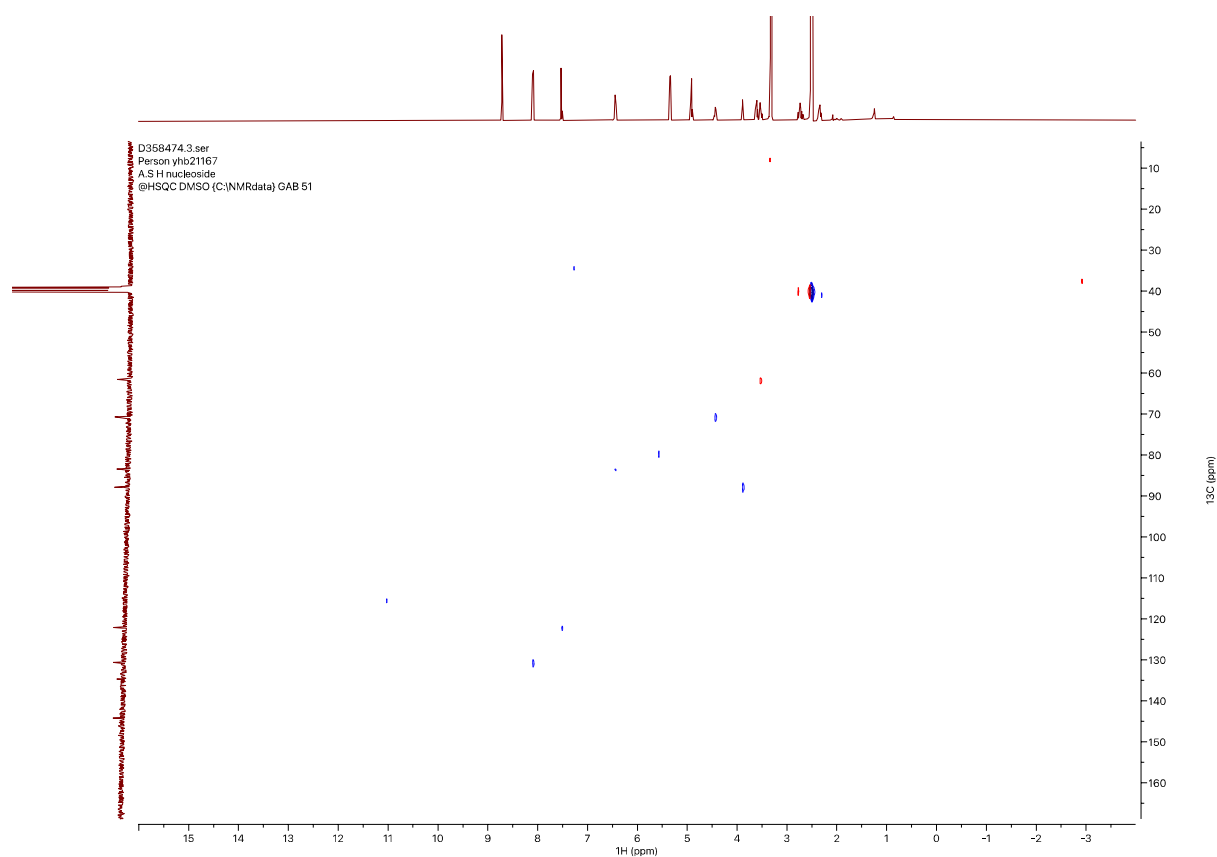

Figure S137 – HSQC NMR spectra of Nucleoside 45

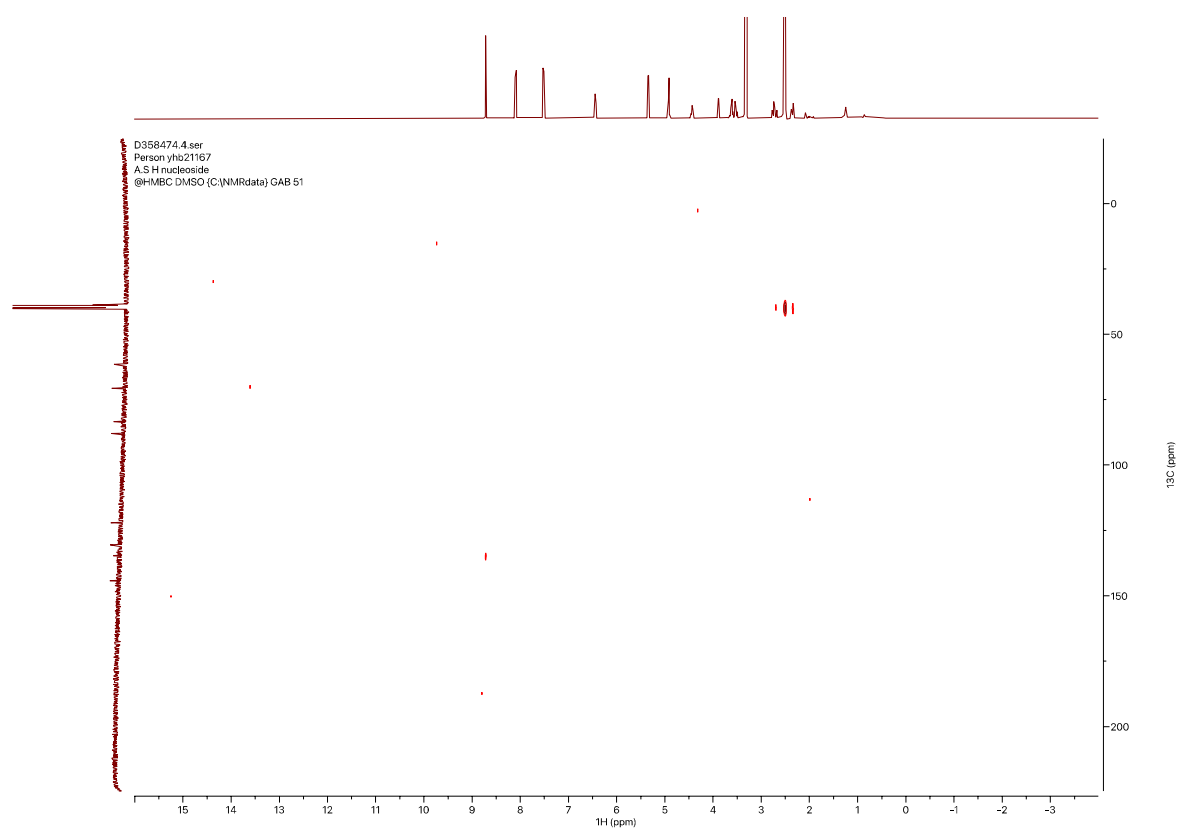

Figure S138 – HMBC NMR spectra of Nucleoside 45

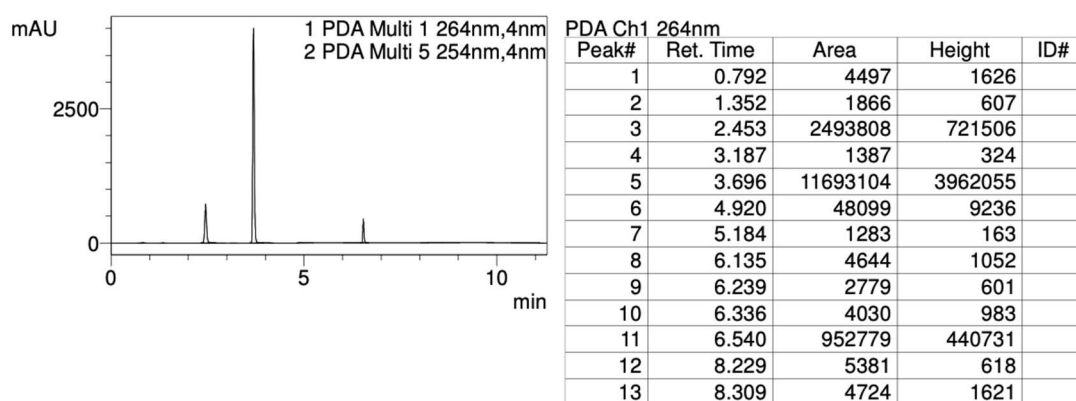

Figure S139 - HPLC trace of the reaction used to obtain Nucleoside 45.  $R.T = 2.4$  = nucleobase released thymine, 3.7 = nucleoside dT, 6.54= Target Nucleoside 45

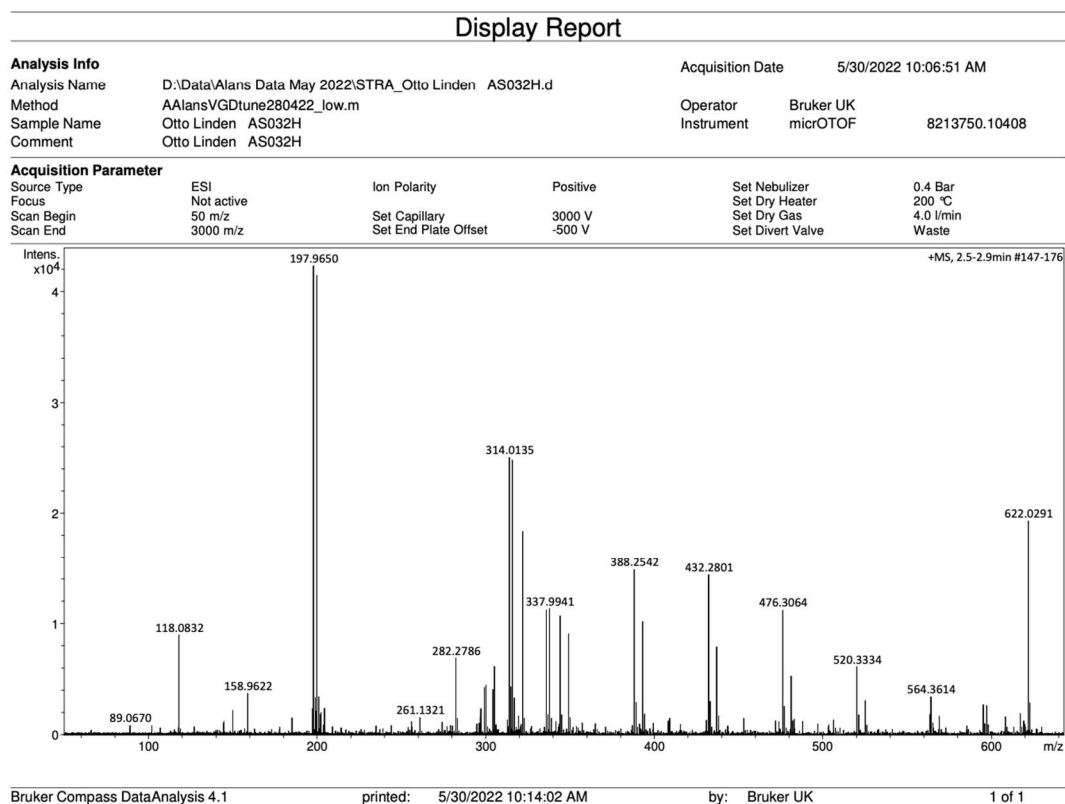

Figure S140 - HRMS of Nucleoside 45

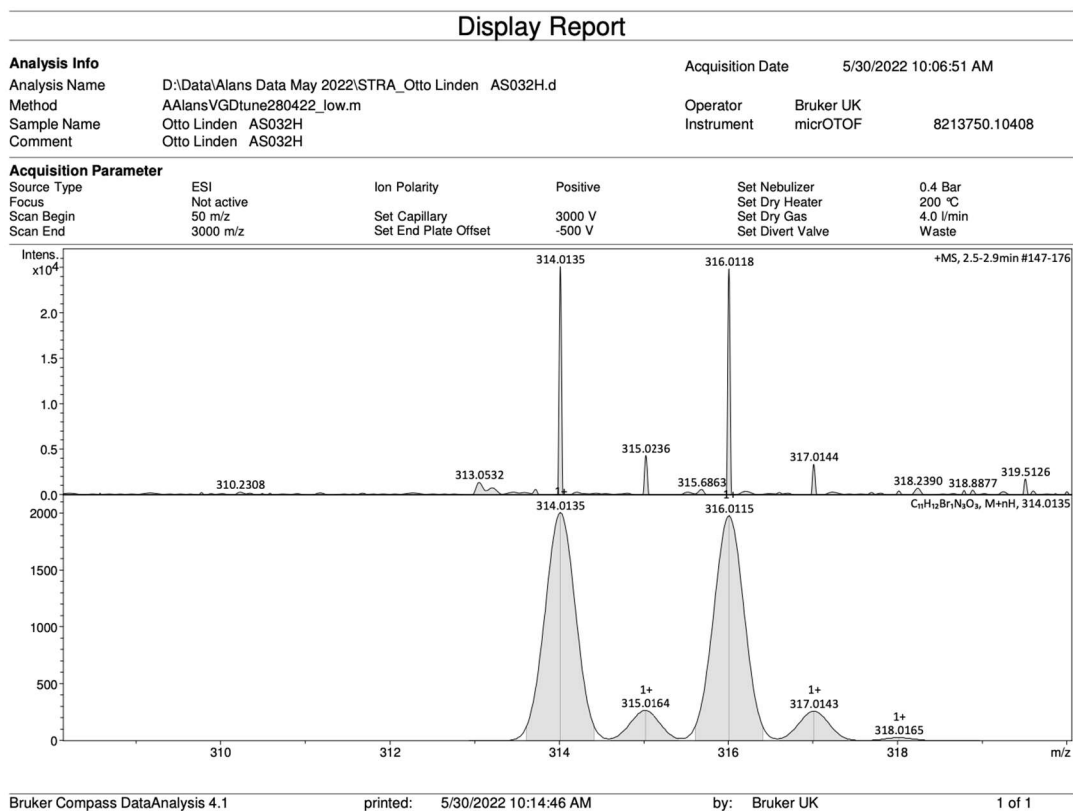

Figure S141 - HRMS of Nucleoside 45

## 2'-Deoxy-deaza-2-methylpurine (46)

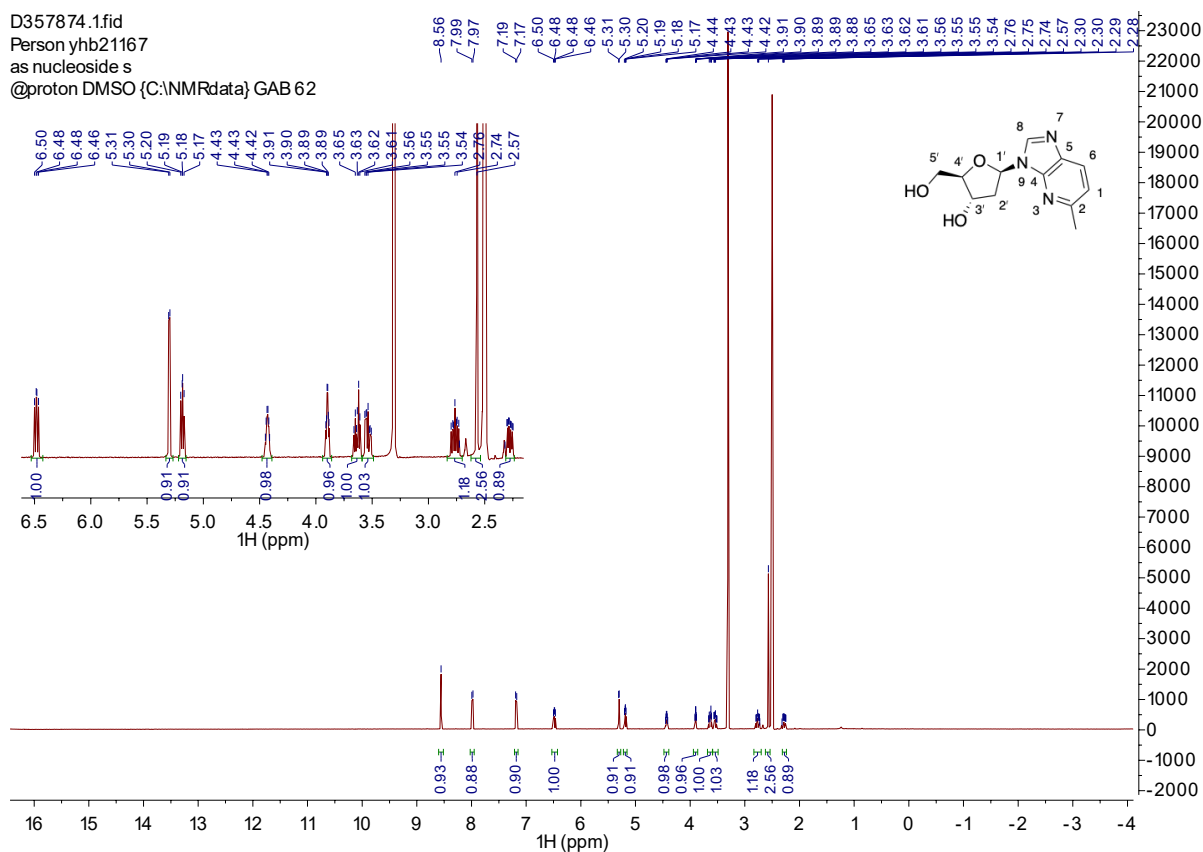

Figure S142 -  $^1\text{H}$  NMR spectra of Nucleoside 46

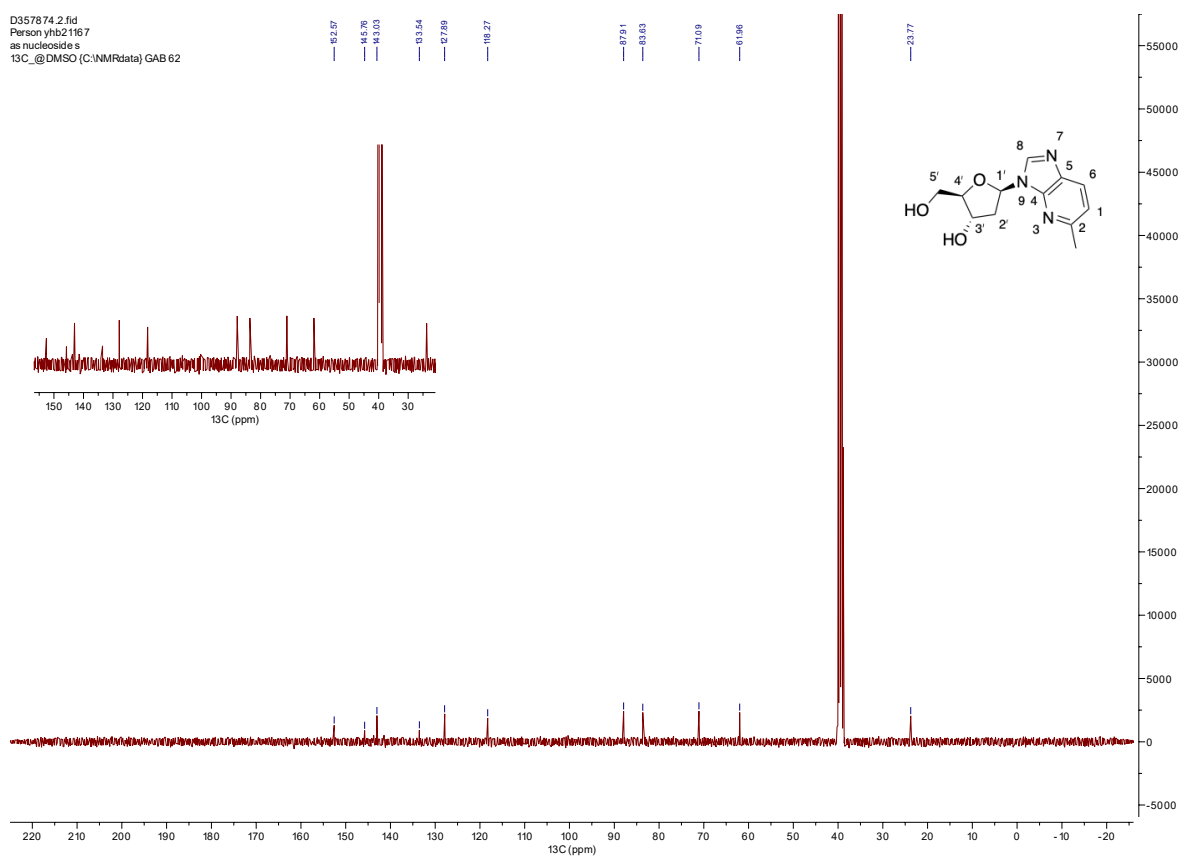

Figure S143 -  $^{13}\text{C}\{^1\text{H}\}$ -NMR spectra of Nucleoside 46

Sample Name : AS032 S  
 Sample ID :  
 Data Filename : BASE S RXN\_08032022\_002.lcd  
 Method Filename : Admir Trans glyco Run.lcm  
 Batch Filename : BASE S RXN.lcb  
 Vial # : 1-85  
 Injection Volume : 10 uL  
 Date Acquired : 08/03/2022 15:17:38  
 Date Processed : 08/03/2022 15:28:59

Sample Type : Unknown  
 Acquired by : Shimadzu  
 Processed by : Shimadzu

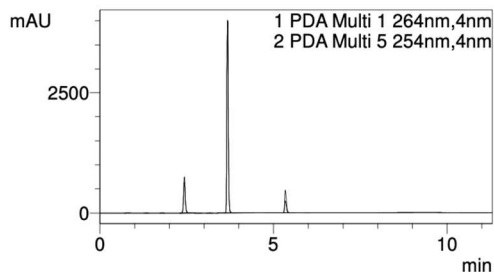

| Peak# | Ret. Time | Area     | Height  | ID# |
|-------|-----------|----------|---------|-----|
| 1     | 0.787     | 4320     | 1544    |     |
| 2     | 1.342     | 1694     | 545     |     |
| 3     | 1.789     | 1175     | 391     |     |
| 4     | 2.435     | 2499073  | 739466  |     |
| 5     | 3.170     | 1380     | 335     |     |
| 6     | 3.440     | 22812    | 6483    |     |
| 7     | 3.680     | 11889360 | 3974722 |     |
| 8     | 4.919     | 4383     | 502     |     |
| 9     | 5.128     | 4582     | 453     |     |
| 10    | 5.343     | 1645117  | 465451  |     |
| 11    | 5.972     | 1048     | 256     |     |
| 12    | 8.233     | 5566     | 650     |     |

Figure S144 - HPLC trace of the final reaction to obtain Nucleoside 46. R.T = 2.44 = thymine nucleobase, 3.68 = nucleoside thymidine, 5.34 = Nucleoside 46

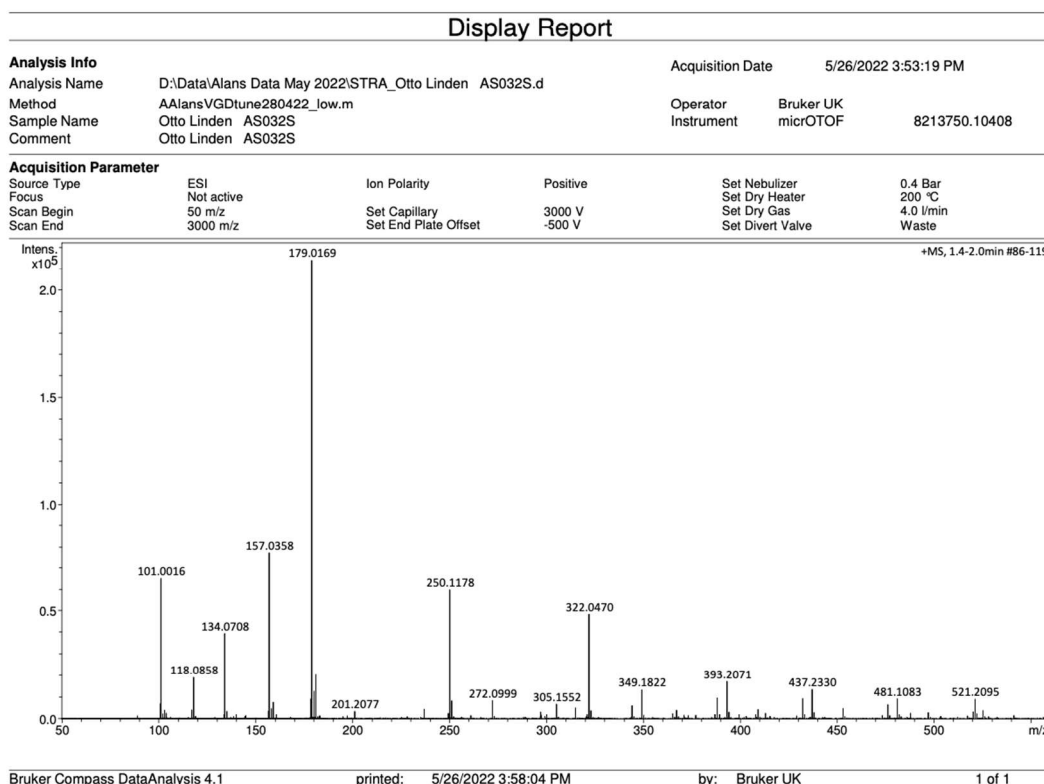

Figure S145 - HRMS of Nucleoside 46

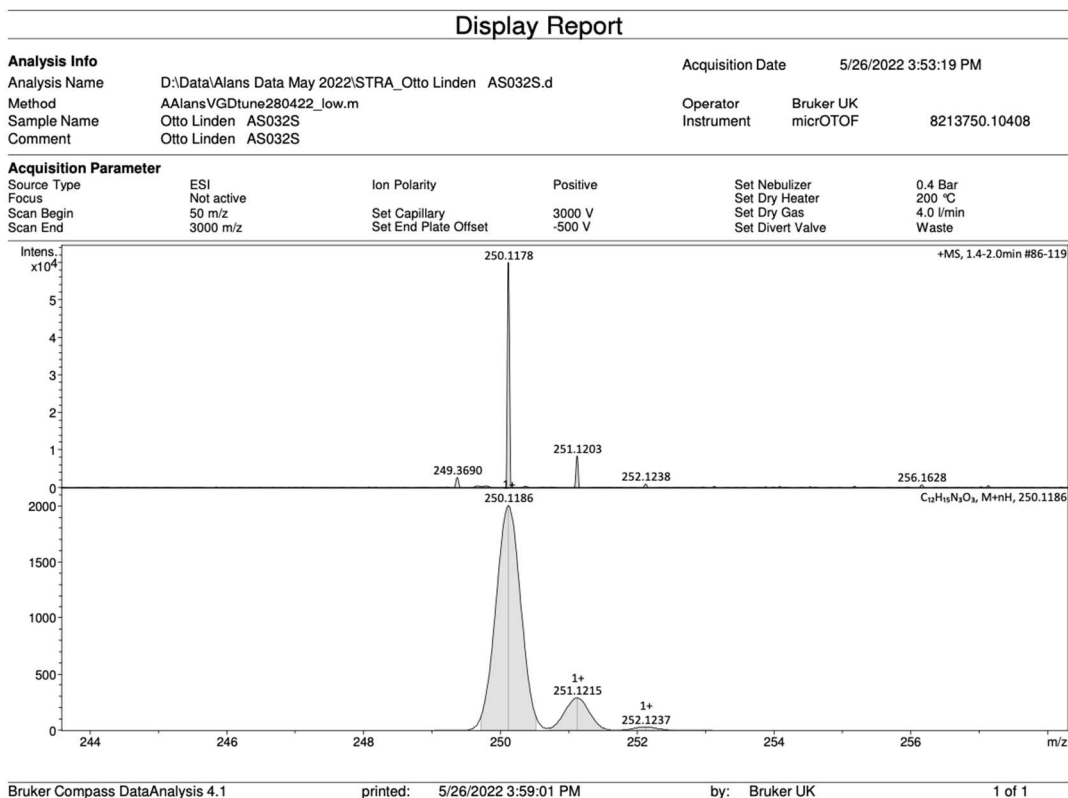

Figure S146 - HRMS of Nucleoside 46

## 2'-Deoxy-deaza-2-trifluoropurine (47)

D368403.1.fid  
 Person yhb21167  
 AS.L.Nuc  
 @proton DMSO {C:\NMRdata} GAB 100

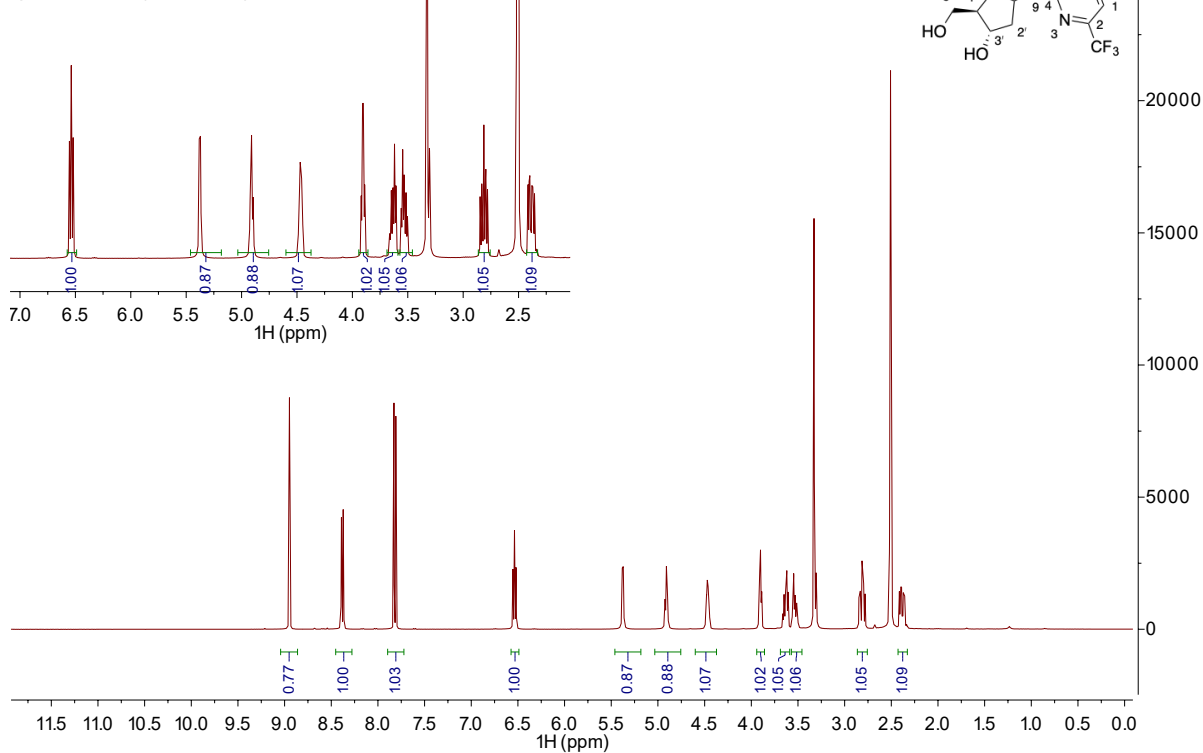

D368403.2.fid  
 Person yhb21167  
 AS.L.Nuc  
 13C\_@DMSO {C:\NMRdata} GAB 100

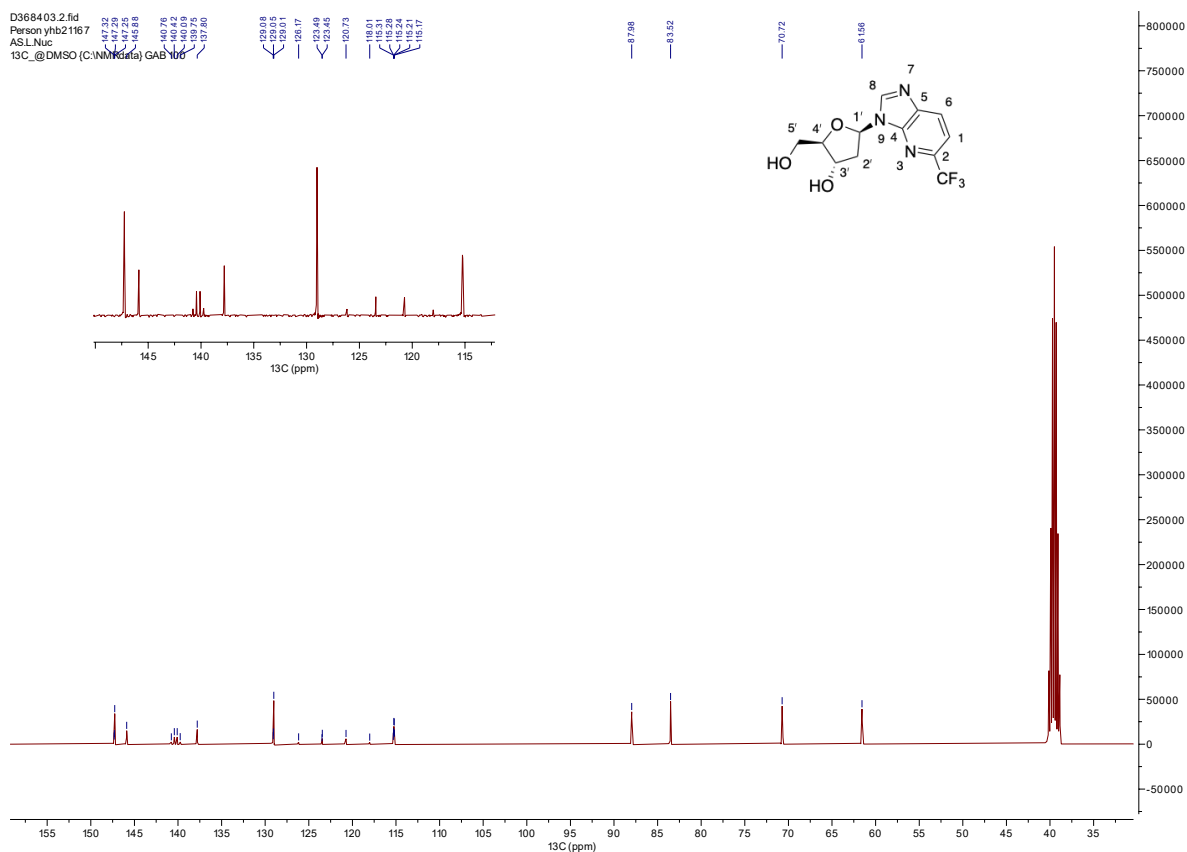

D368403.7.fid  
 Person yhb21167  
 AS.L.Nuc  
 @19F DMSO {C:\NMRdata} GAB 100

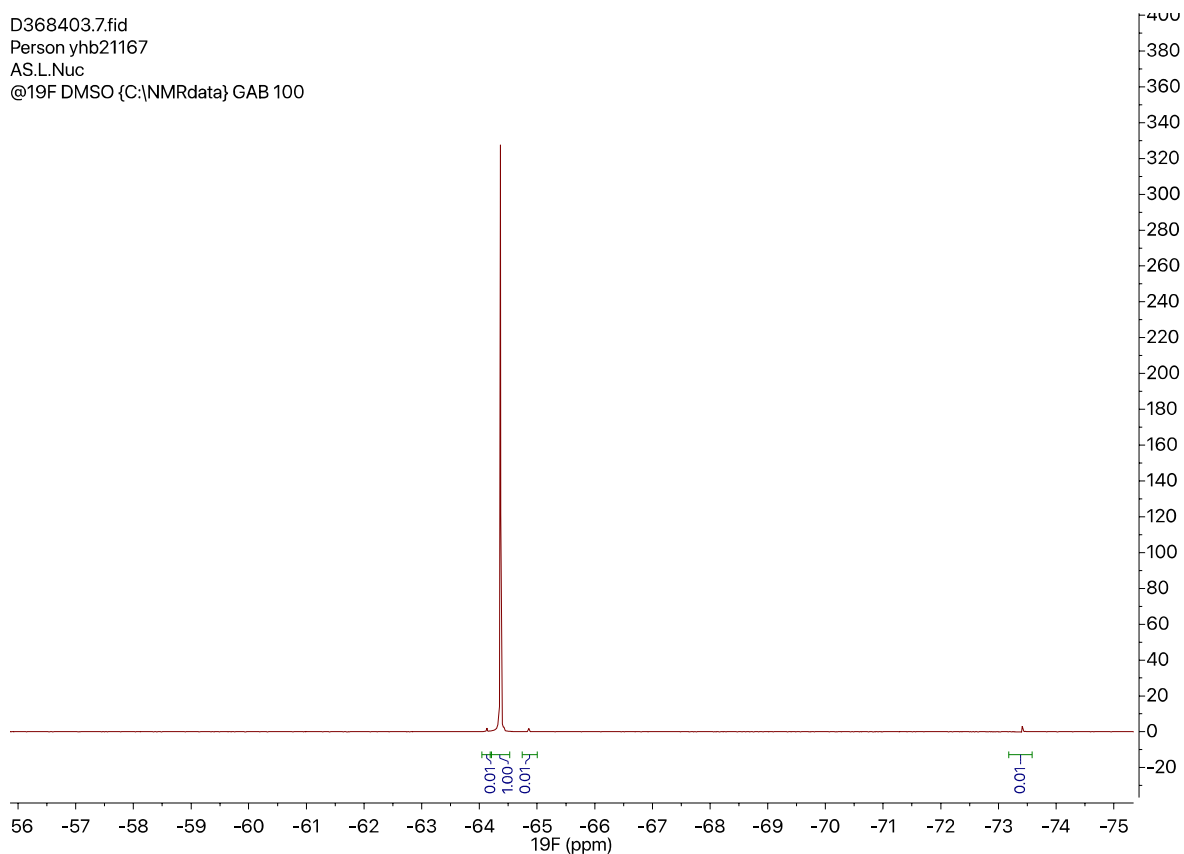

Figure S149 -  $^{19}\text{F}$  NMR spectra for nucleoside 47

Sample Name : L.2 RXN  
 Sample ID :  
 Data Filename : AS050 RXNS\_09062022\_012.lcd  
 Method Filename : Admir Trans glyco Run.lcm  
 Batch Filename : AS050 RXNS.lcb  
 Vial # : 1-27  
 Injection Volume : 10 uL  
 Date Acquired : 09/06/2022 15:08:08  
 Date Processed : 09/06/2022 15:19:29

Sample Type : Unknown  
 Acquired by : Shimadzu  
 Processed by : Shimadzu

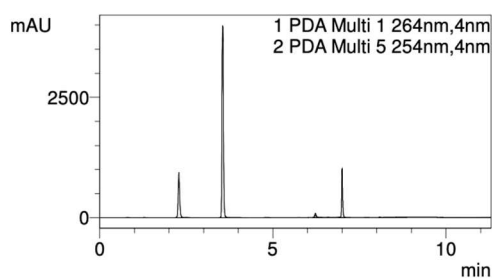

| Peak# | Ret. Time | Area     | Height  | ID# |
|-------|-----------|----------|---------|-----|
| 1     | 0.789     | 5645     | 2499    |     |
| 2     | 1.117     | 1392     | 161     |     |
| 3     | 1.287     | 3089     | 1023    |     |
| 4     | 2.287     | 2999723  | 925809  |     |
| 5     | 3.552     | 11738995 | 3925434 |     |
| 6     | 4.813     | 2265     | 423     |     |
| 7     | 6.228     | 341675   | 90028   |     |
| 8     | 6.593     | 57570    | 5945    |     |
| 9     | 7.000     | 2106961  | 972883  |     |
| 10    | 7.695     | 5197     | 2495    |     |
| 11    | 8.087     | 14627    | 7413    |     |

Figure S150 - HPLC trace for the reaction used to obtain nucleoside 47. R.T- 2.29 = thymine, 3.5 = thymidine, 6.23 = left over nucleobase L, 7.0 = nucleoside 47.



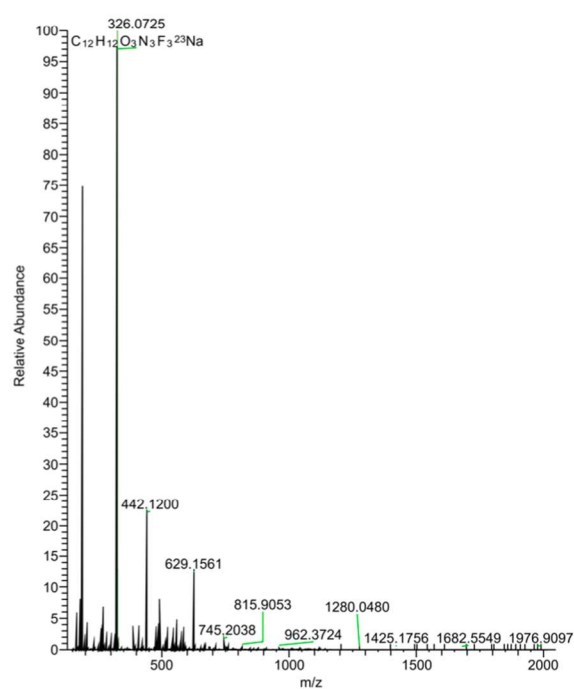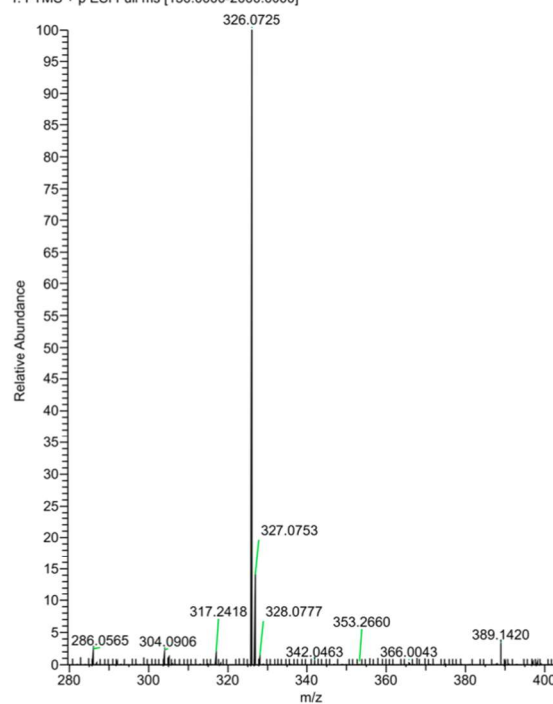

| Peak Mass | Display For...                                                                                | S Fit                | RDB   | Delta [ppm] | Theo. mass | Rank | Combined S... | # Matched I... | # Missed Iso. | MS Cov. [%] | Pattern Cov.... | MSMS Matc... |
|-----------|-----------------------------------------------------------------------------------------------|----------------------|-------|-------------|------------|------|---------------|----------------|---------------|-------------|-----------------|--------------|
| 326.0725  | C <sub>12</sub> H <sub>12</sub> O <sub>3</sub> N <sub>3</sub> F <sub>3</sub> <sup>23</sup> Na | 85.08998321<br>64638 | 6.50  | 0.66        | 326.07230  | 1    | 98.99         | 3              | 0             | 99.77       | 100             | (Collection) |
| 326.0725  | C <sub>15</sub> H <sub>11</sub> O <sub>2</sub> N <sub>3</sub> F <sub>2</sub> <sup>23</sup> Na | 28.89309220<br>14385 | 10.50 | 4.16        | 326.07115  | 2    | 96.04         | 4              | 0             | 99.77       | 99.91           | (Collection) |

Figure S151 - HRMS of nucleoside 47

## 2'-Deoxy-deaza-8-chloropurine (48)

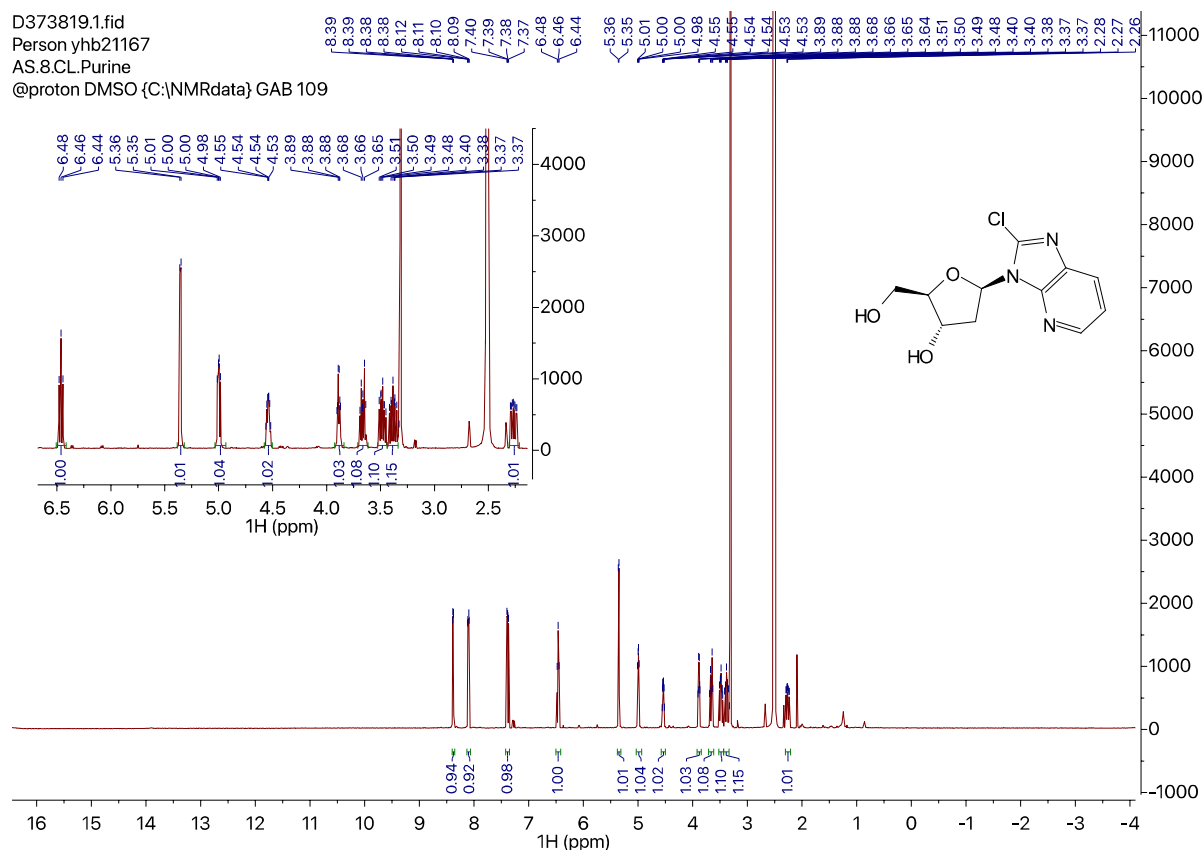

Figure S152 -  $^1\text{H}$  NMR of nucleoside 48

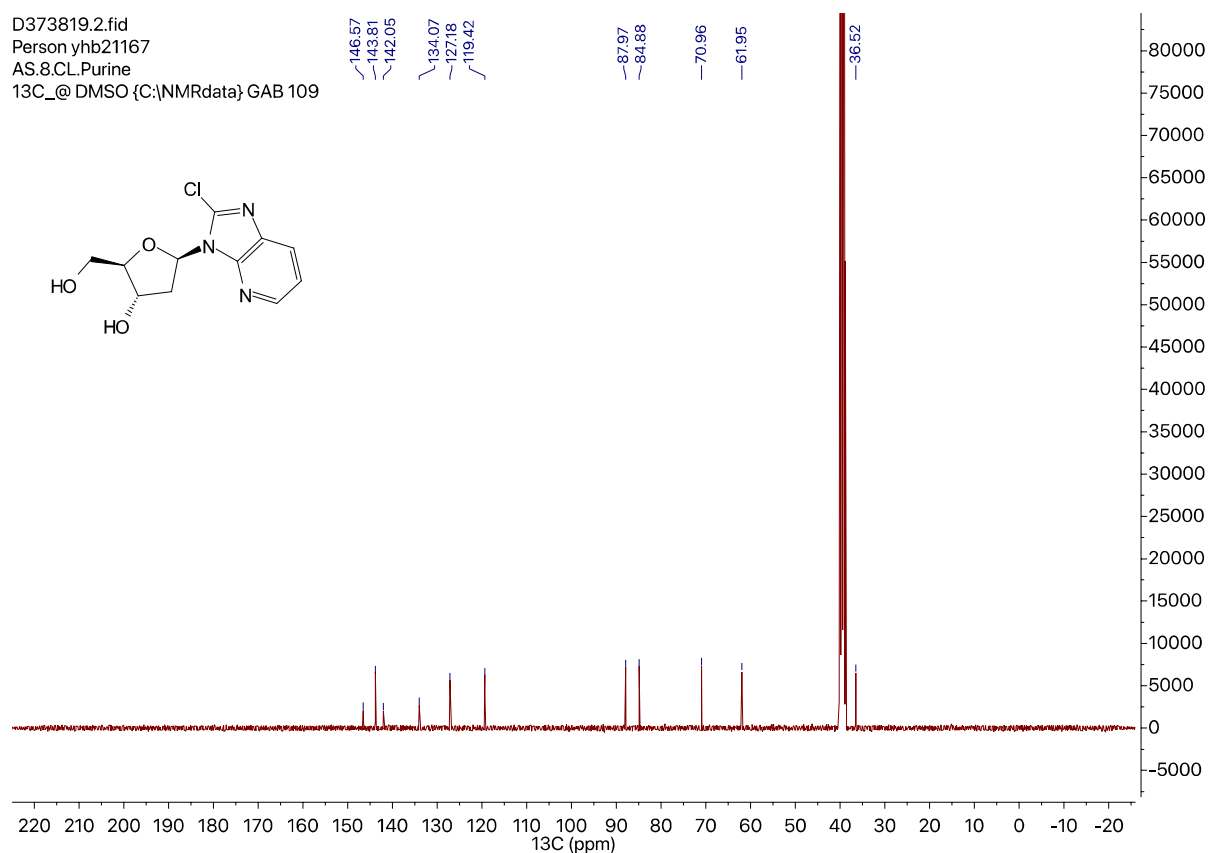

Figure S153 -  $^{13}\text{C}$  NMR of nucleoside 48

Sample Name : 1.2  
Sample ID :  
Data Filename : rxns 1.2,1.4,1.5\_20092022\_001.lcd  
Method Filename : Admir Trans glyco Run.lcm  
Batch Filename : rxns 1.2,1.4,1.5.lcb  
Vial # : 1-16  
Injection Volume : 10 uL  
Date Acquired : 20/09/2022 12:10:11  
Date Processed : 20/09/2022 12:21:32

Sample Type : Unknown  
Acquired by : Shimadzu  
Processed by : Shimadzu

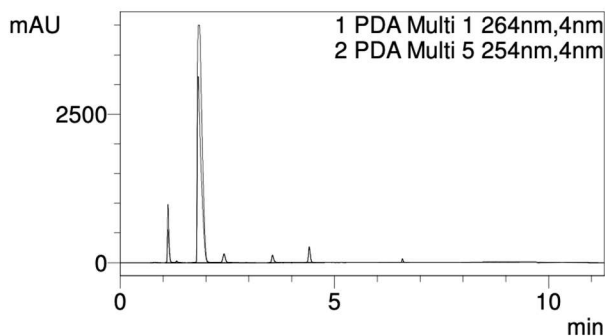

| Peak# | Ret. Time | Area     | Height  | ID# |
|-------|-----------|----------|---------|-----|
| 1     | 0.792     | 9662     | 4698    |     |
| 2     | 1.117     | 2426984  | 967378  |     |
| 3     | 1.319     | 68226    | 23949   |     |
| 4     | 1.833     | 30298234 | 4000096 |     |
| 5     | 2.424     | 611590   | 146754  |     |
| 6     | 3.556     | 466491   | 127865  |     |
| 7     | 3.880     | 42488    | 3659    |     |
| 8     | 4.413     | 900178   | 268008  |     |
| 9     | 6.280     | 3359     | 340     |     |
| 10    | 6.588     | 138583   | 63653   |     |
| 11    | 8.053     | 2460     | 499     |     |
| 12    | 8.319     | 31093    | 3854    |     |
| 13    | 8.472     | 27770    | 3308    |     |

Figure S154 - HPLC spectrum of the reaction. R.T = 1.11 = released cytosine, 1.83 = dc, 3.56 = nucleobase 4.4 = nucleoside 48

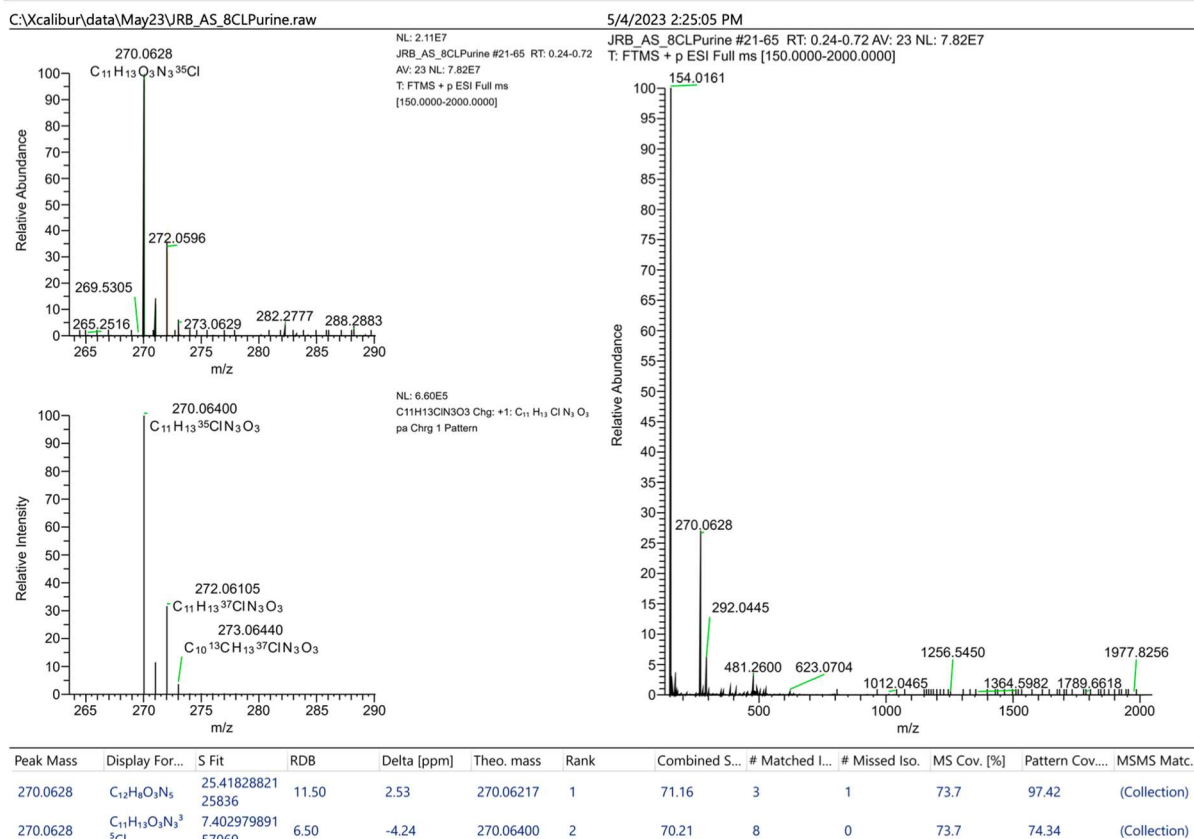

Figure S155 - HRMS of the nucleoside 48

## 2'-Deoxy-deaza-8-trifluoropurine (49)

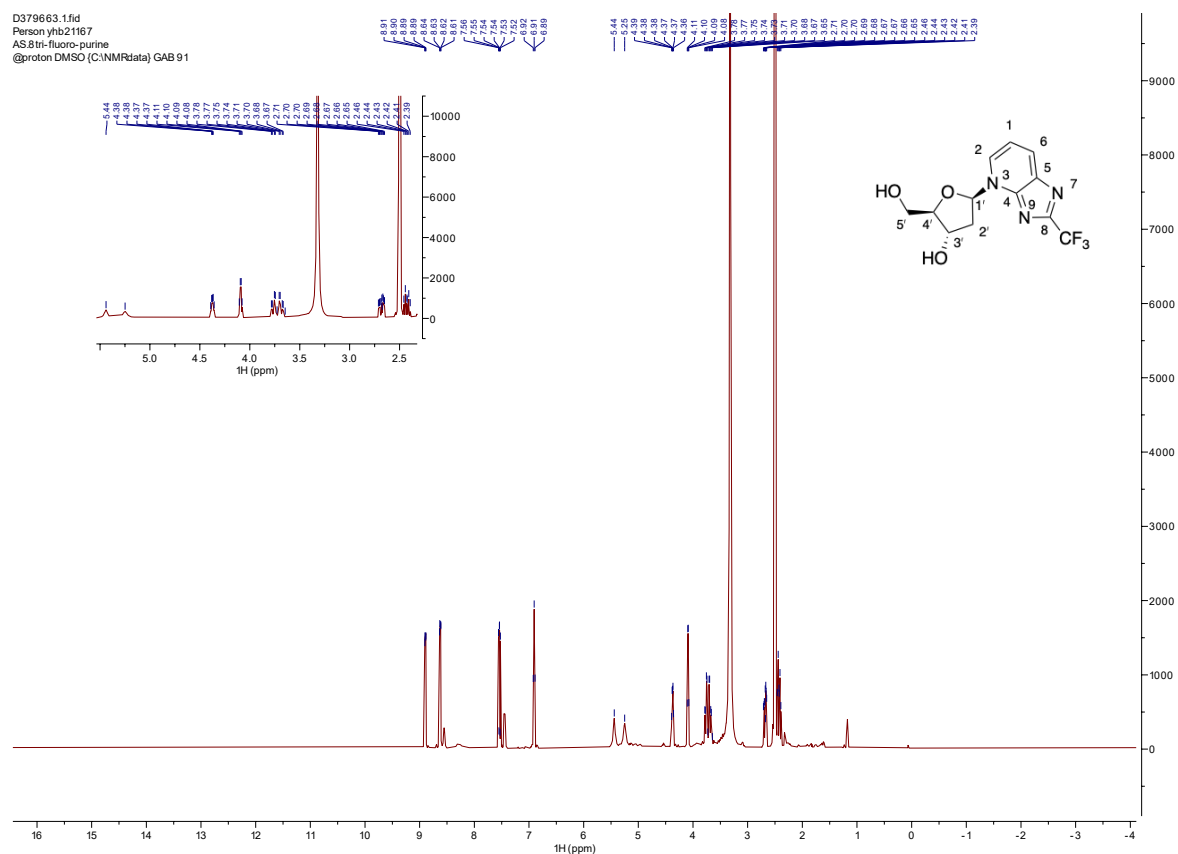

Figure S156 - <sup>1</sup>H NMR of Nucleoside 49

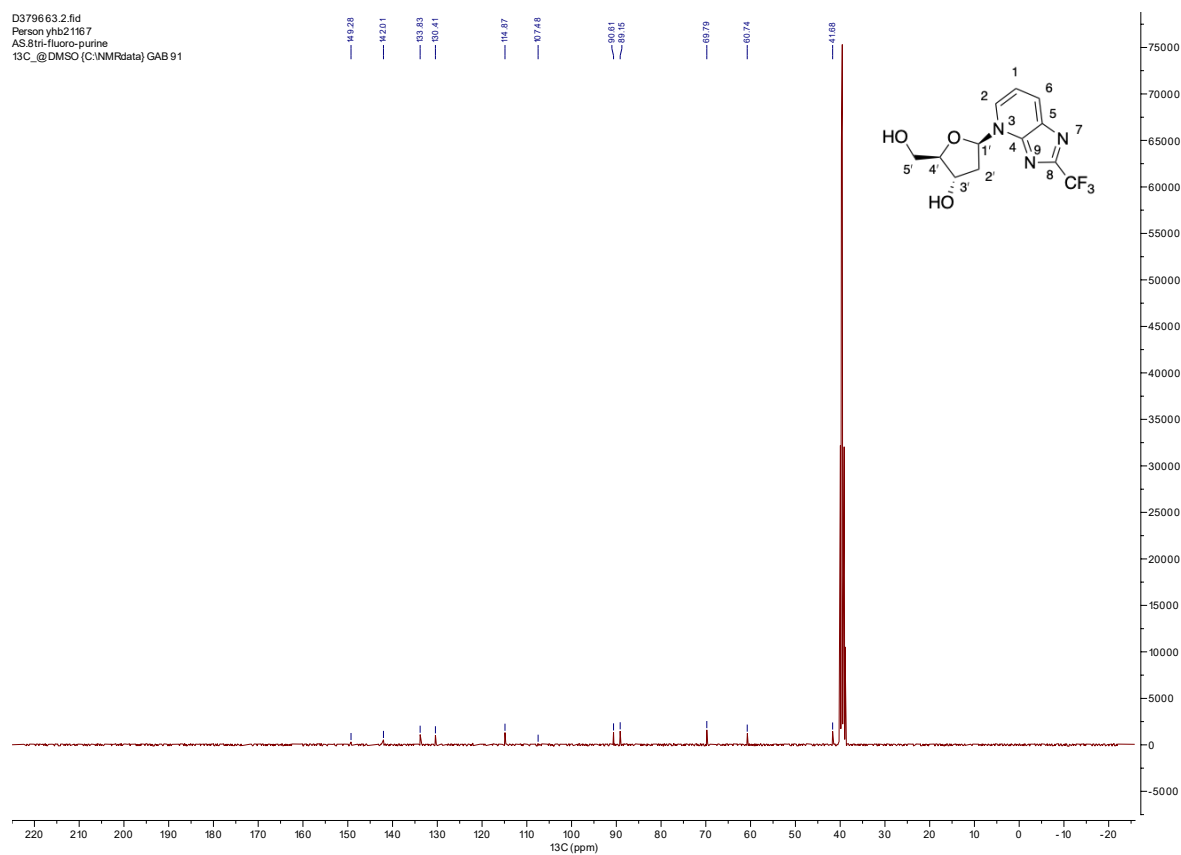

Figure S157 - <sup>13</sup>C NMR of Nucleoside 49

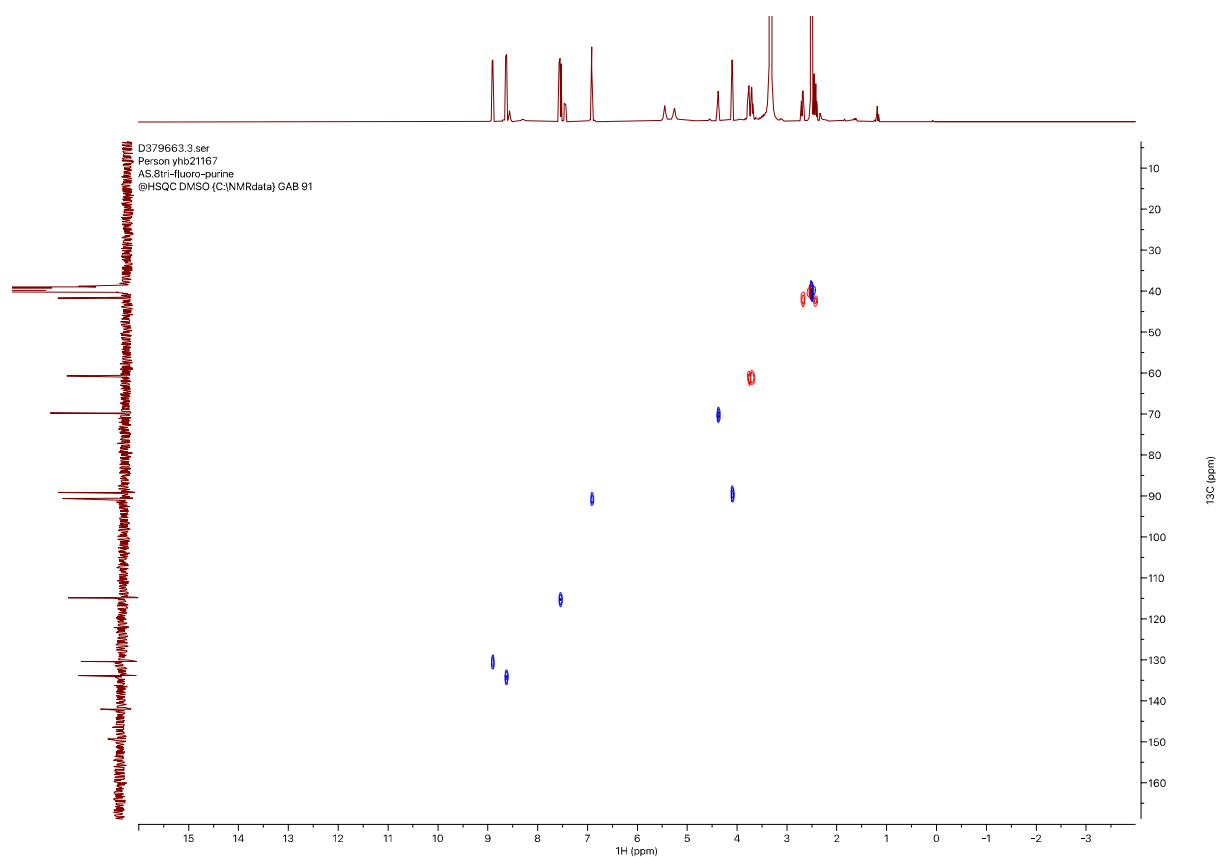

Figure S158 - HSQC NMR of Nucleoside 49

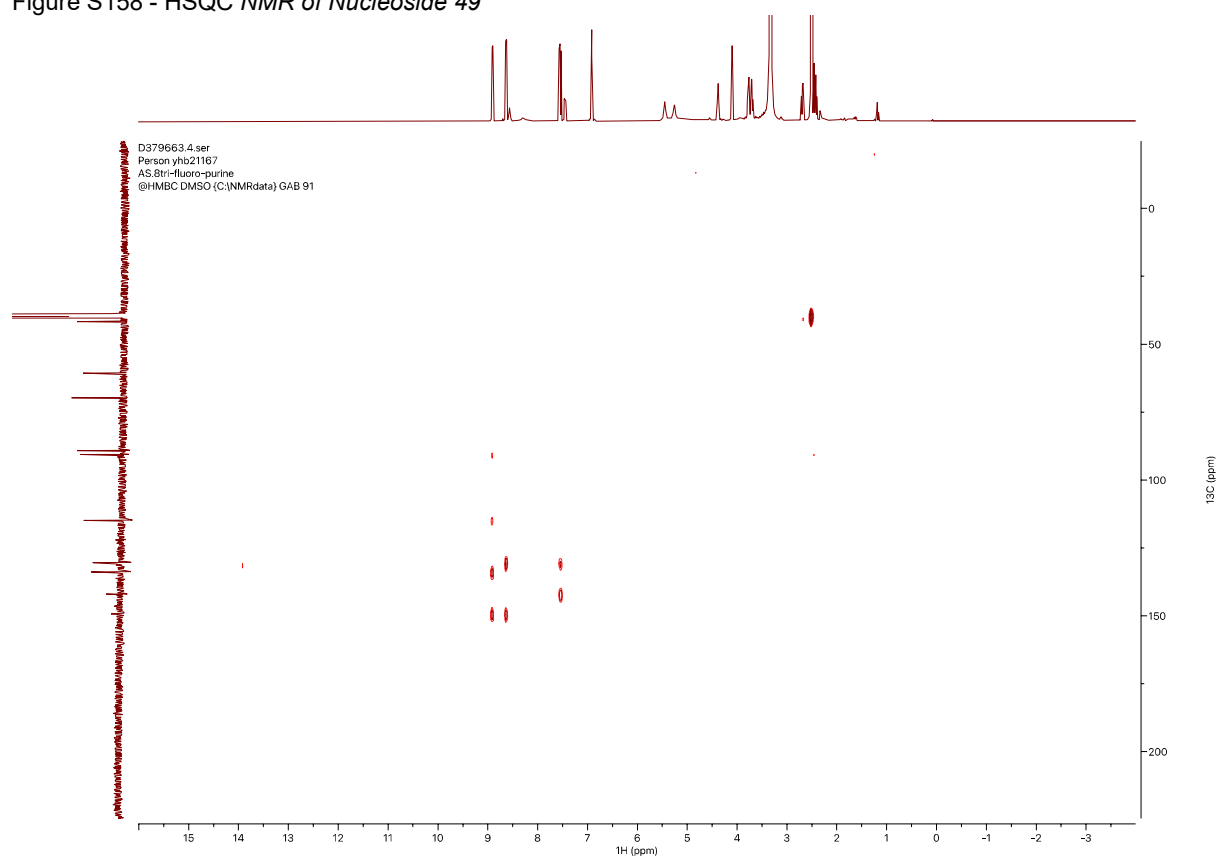

Figure S159 - HMBC NMR of Nucleoside 49

D379663.6.fid  
Person yhb21167  
AS.8tri-fluoro-purine  
@19F DMSO (C:\NMRdata) GAB 91

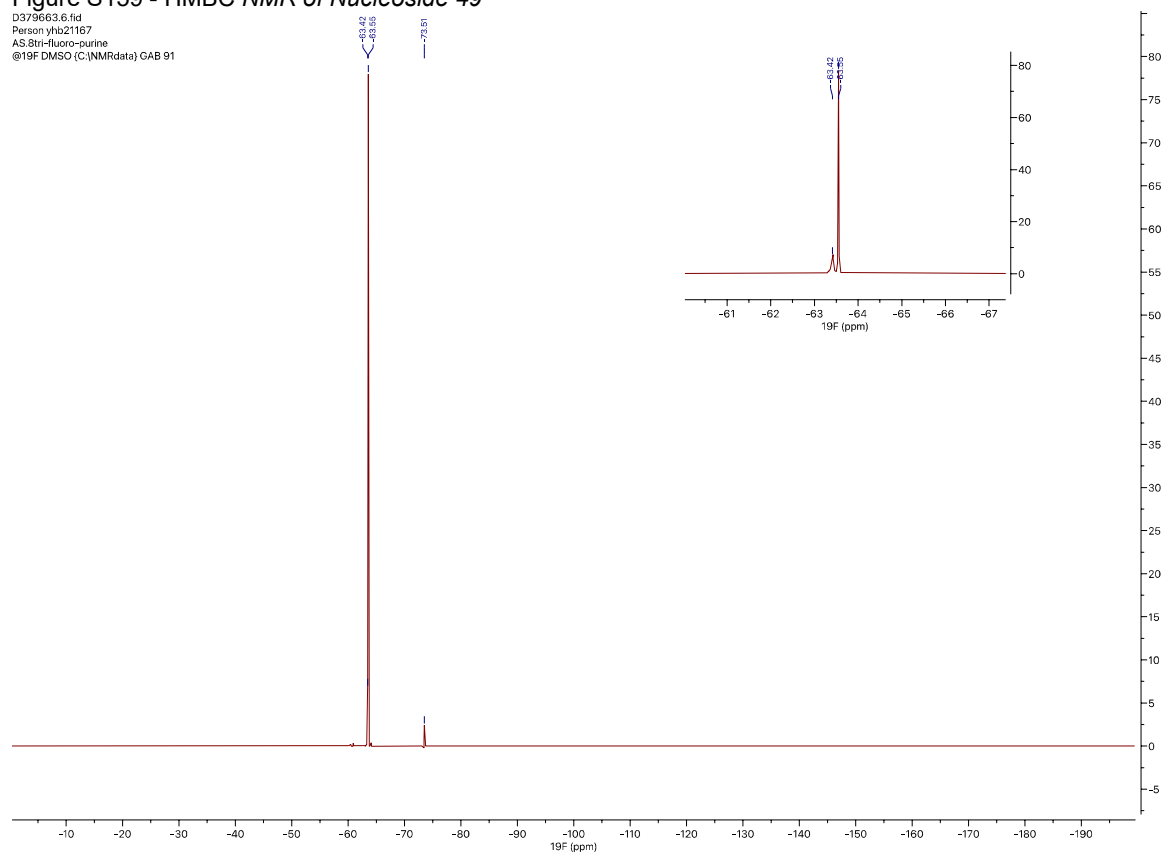

Figure S160 -  $^{19}\text{F}$  NMR of nucleoside 49

Sample Name : trifluoro  
 Sample ID :  
 Data Filename : runs day after 24hr part 2\_22092022\_006.lcd  
 Method Filename : Admir Trans glyco Run.lcm  
 Batch Filename : runs day after 24hr part 2.lcb  
 Vial # : 1-101  
 Injection Volume : 10 uL  
 Date Acquired : 22/09/2022 14:31:26  
 Date Processed : 22/09/2022 14:42:46

Sample Type : Unknown  
 Acquired by : Shimadzu  
 Processed by : Shimadzu

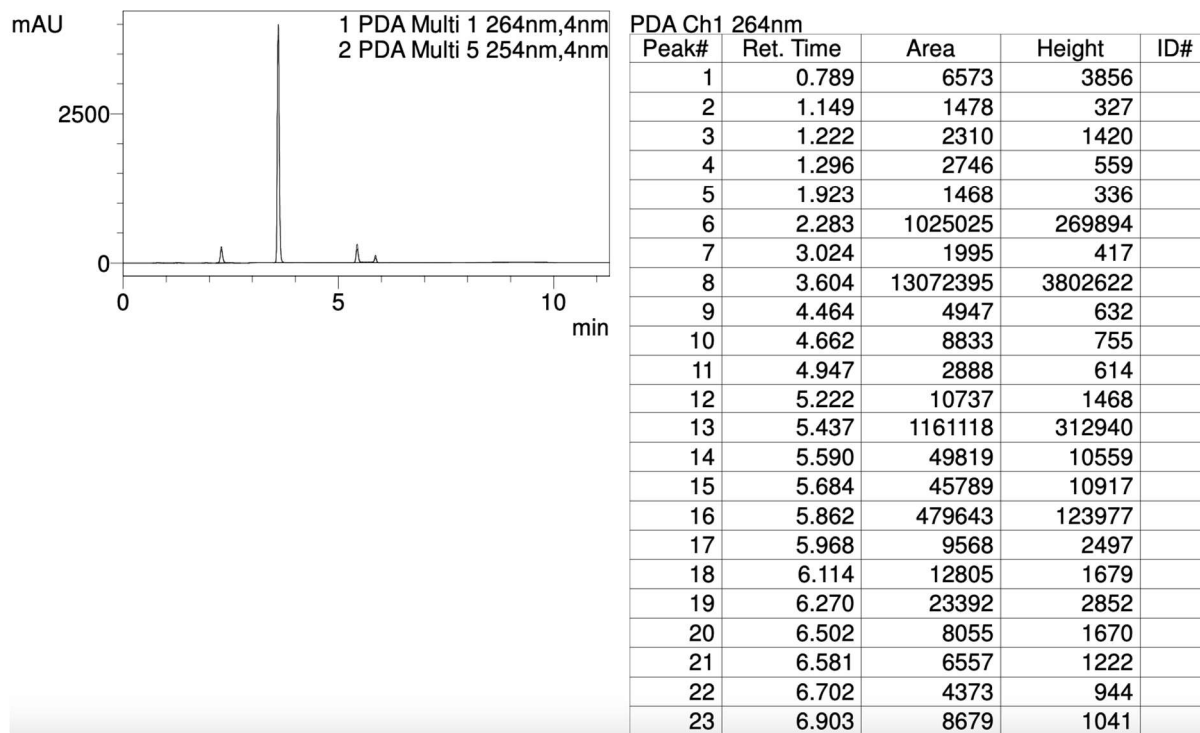

Figure S161 - HPLC spectrum – R.T = 2.28 = thymine released, 3.60 = T, 5.44 = nucleobase, 5.86 = nucleoside 49.

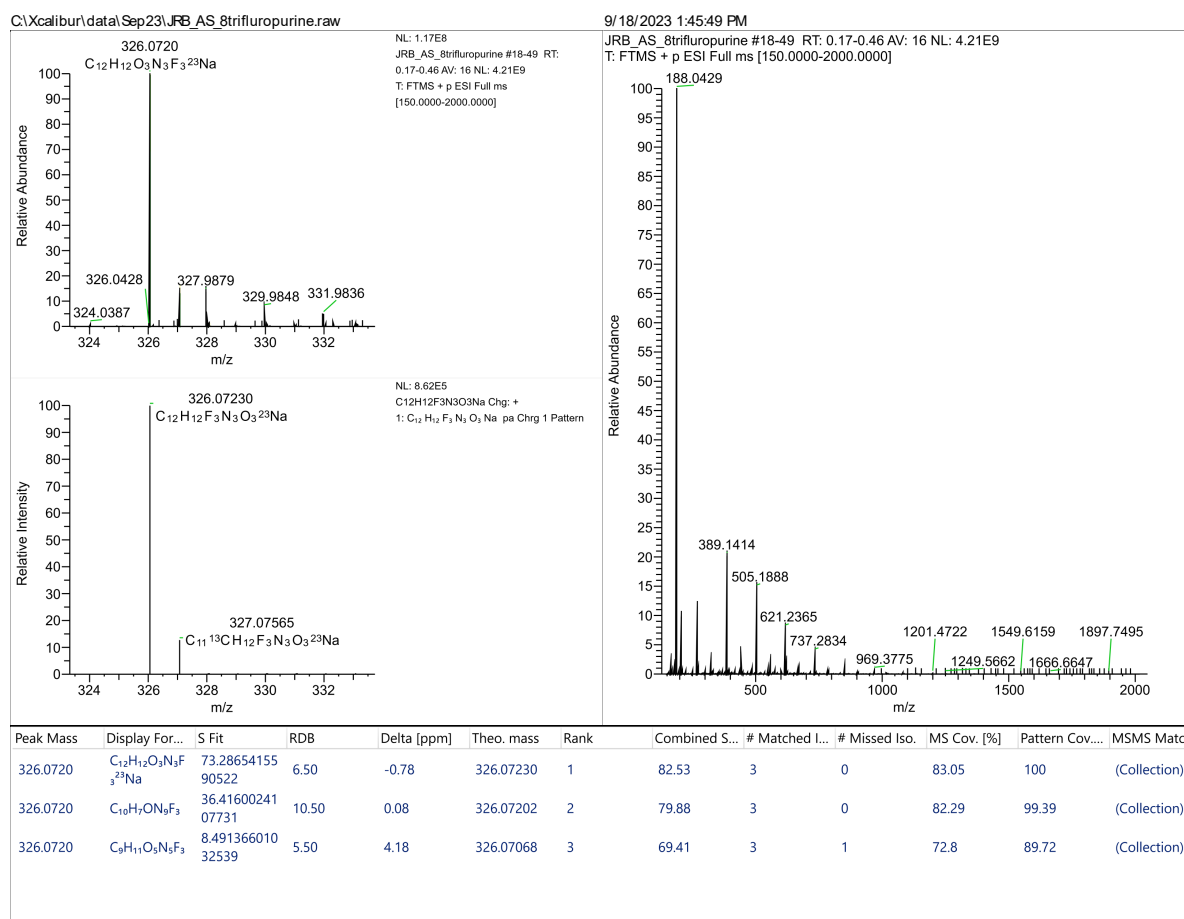

Figure S162 - HRMS of nucleoside 49

## 2'-Deoxy-triazolo-6-chloropurine (50)



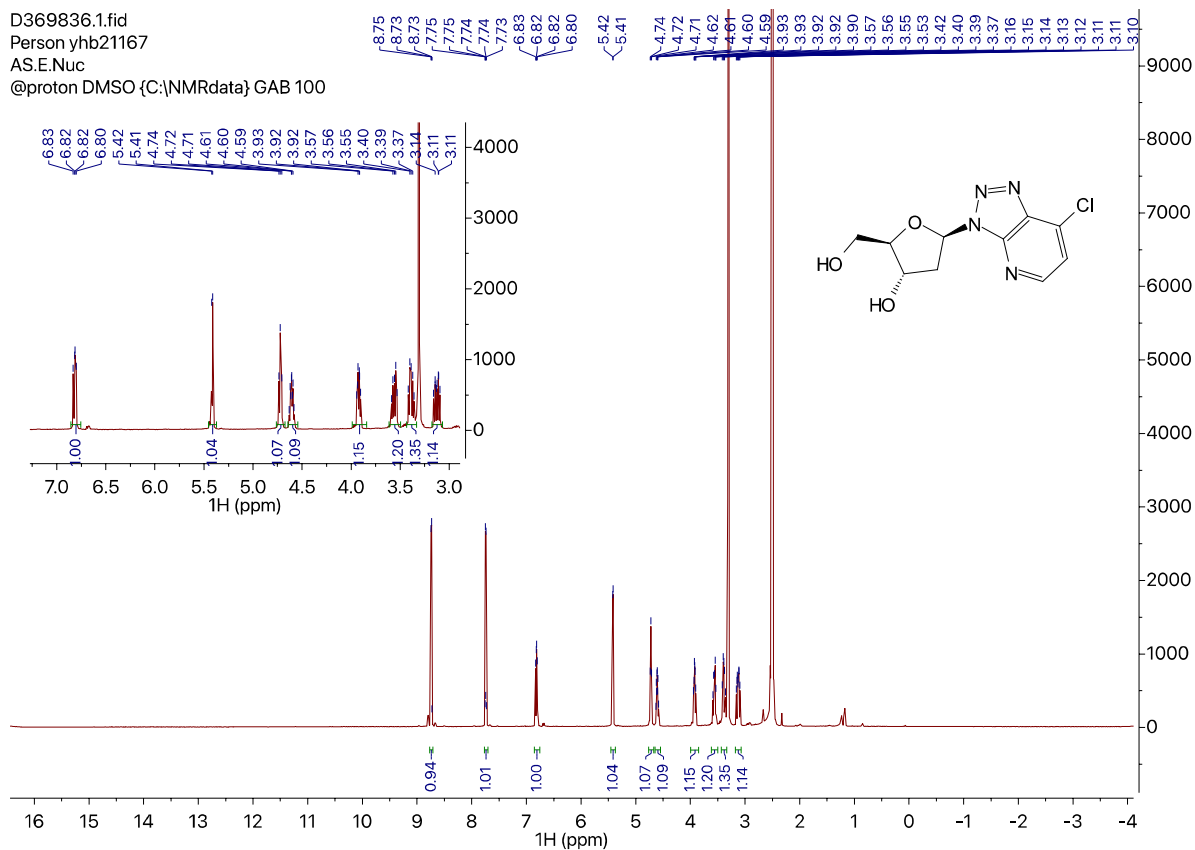

Figure S163 -  $^1\text{H}$  NMR of nucleoside 50

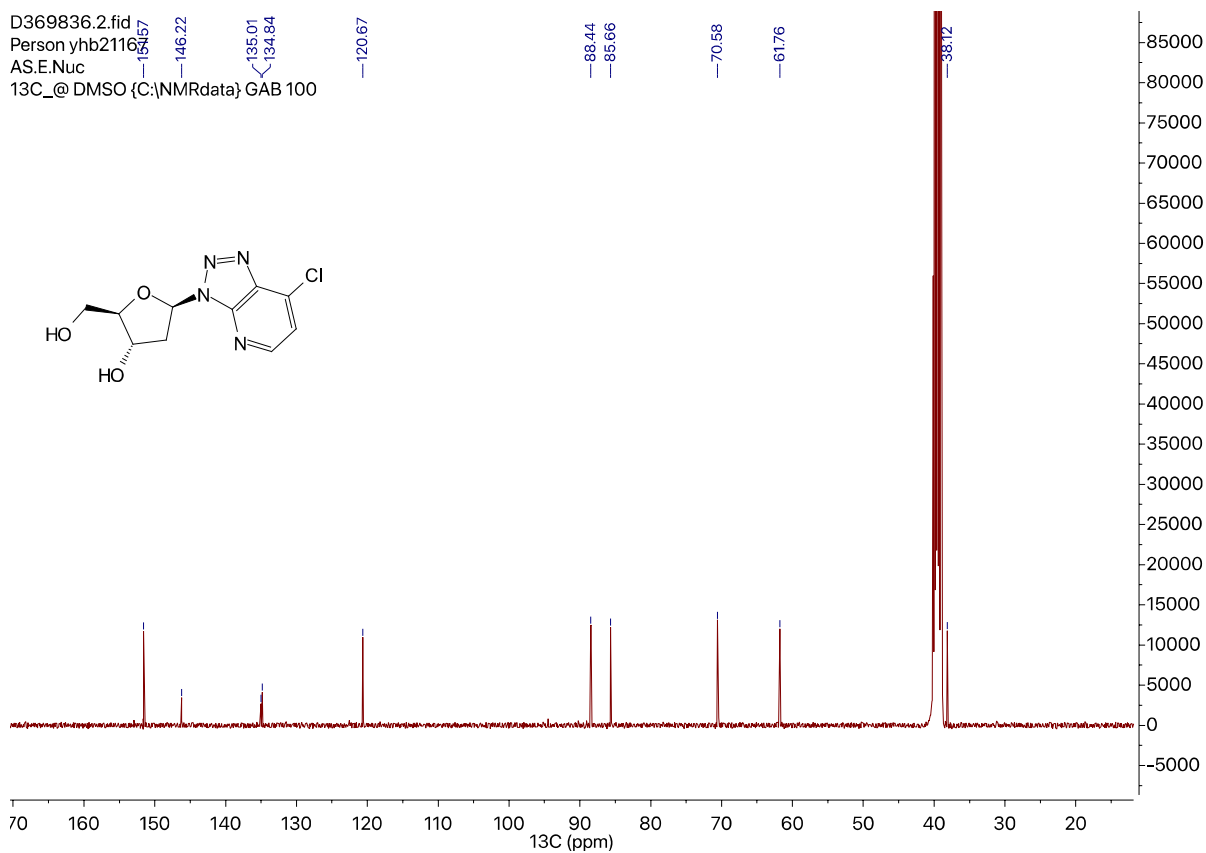

Figure S164 -  $^{13}\text{C}$  NMR spectrum of nucleoside 50

Sample Name : BASE E RXN  
Sample ID :  
Data Filename : BASE E RXN\_17032022\_001.lcd  
Method Filename : Admir Trans glyco Run.lcm  
Batch Filename : BASE E RXN.lcb  
Vial # : 1-37  
Injection Volume : 10 uL  
Date Acquired : 17/03/2022 16:10:52  
Date Processed : 17/03/2022 16:22:13

Sample Type : Unknown  
Acquired by : Shimadzu  
Processed by : Shimadzu

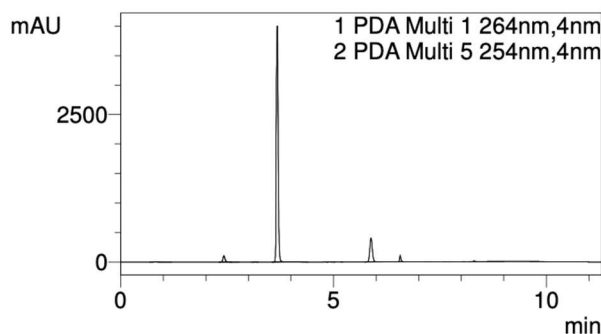

PDA Ch1 264nm

| Peak# | Ret. Time | Area     | Height  | ID# |
|-------|-----------|----------|---------|-----|
| 1     | 0.785     | 8256     | 2726    |     |
| 2     | 1.024     | 1992     | 213     |     |
| 3     | 2.426     | 375090   | 107166  |     |
| 4     | 3.167     | 1920     | 488     |     |
| 5     | 3.680     | 12870173 | 3996706 |     |
| 6     | 3.983     | 6306     | 2325    |     |
| 7     | 4.916     | 1534     | 308     |     |
| 8     | 5.882     | 1636722  | 397847  |     |
| 9     | 6.232     | 2040     | 722     |     |
| 10    | 6.566     | 217494   | 90376   |     |
| 11    | 7.235     | 1252     | 474     |     |
| 12    | 7.714     | 1697     | 289     |     |
| 13    | 8.059     | 8568     | 3301    |     |
| 14    | 8.216     | 3632     | 545     |     |

Figure S165 - HPLC spectrum of nucleoside 50. R.T = 2.4 = thymine released, 3.68 = thymidine, 5.88 = nucleobase, 6.57 = nucleoside 50

C:\Xcalibur\data\Mar24\JRB\_AS\_E\_2.raw

3/7/2024 3:21:22 PM

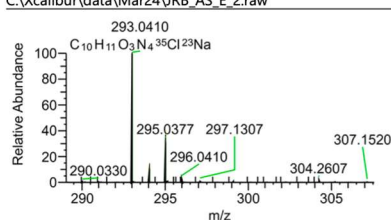

NL: 1.02E8  
JRB\_AS\_E\_2 #14-45 RT: 0.13-0.44 AV: 16  
NL: 1.01E8  
T: FTMS + p ESI Full ms  
[150.0000-2000.0000]

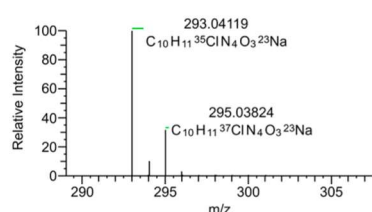

NL: 6.65E5  
C10H11ClN4O3Na Chg: +  
1: C10H11ClN4O3Na pa Chrg 1 Pattern

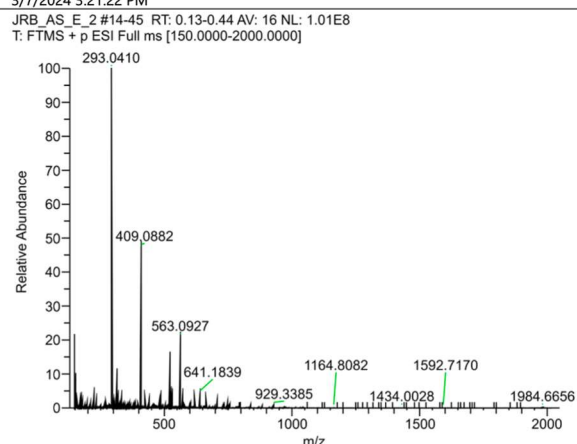

| Peak Mass | Display For...                                                                                     | S Fit                | RDB   | Delta [ppm] | Theo. mass | Rank | Combined S... | # Matched I... | # Missed Iso. | MS Cov. [%] | Pattern Cov.... | MSMS Matc... |
|-----------|----------------------------------------------------------------------------------------------------|----------------------|-------|-------------|------------|------|---------------|----------------|---------------|-------------|-----------------|--------------|
| 293.0410  | C <sub>10</sub> H <sub>11</sub> O <sub>3</sub> N <sub>4</sub> <sup>3</sup><br>5Cl <sup>23</sup> Na | 52.76998800<br>87094 | 6.50  | -0.71       | 293.04119  | 1    | 94.31         | 5              | 1             | 96.61       | 99.34           | (Collection) |
| 293.0410  | C <sub>9</sub> H <sub>12</sub> O <sub>6</sub> N <sub>3</sub> <sup>35</sup><br>Cl                   | 40.60541767<br>80013 | 5.00  | 0.23        | 293.04091  | 2    | 93.5          | 5              | 1             | 96.43       | 98.65           | (Collection) |
| 293.0410  | C <sub>9</sub> H <sub>15</sub> O <sub>7</sub> <sup>35</sup> Cl <sup>2</sup><br>3Na                 | 31.73088581<br>17625 | 1.50  | 3.86        | 293.03985  | 3    | 93.03         | 5              | 1             | 96.43       | 98.49           | (Collection) |
| 293.0410  | C <sub>8</sub> H <sub>9</sub> O <sub>2</sub> N <sub>7</sub> <sup>35</sup> C<br>I <sup>23</sup> Na  | 21.56902260<br>30449 | 7.00  | 3.88        | 293.03985  | 4    | 92.49         | 5              | 2             | 96.43       | 97.48           | (Collection) |
| 293.0410  | C <sub>8</sub> H <sub>6</sub> ON <sub>10</sub> <sup>35</sup> C<br>I                                | 20.99824872<br>84048 | 10.50 | 0.25        | 293.04091  | 5    | 92.46         | 5              | 4             | 96.43       | 96.19           | (Collection) |
| 293.0410  | C <sub>7</sub> H <sub>10</sub> O <sub>5</sub> N <sub>6</sub> <sup>35</sup><br>Cl                   | 9.666070999<br>82584 | 5.50  | 4.81        | 293.03957  | 6    | 83.17         | 5              | 2             | 87.26       | 90.6            | (Collection) |
| 293.0410  | C <sub>11</sub> H <sub>3</sub> O <sub>2</sub> N <sub>9</sub>                                       | 25.77873612<br>96112 | 15.00 | 1.91        | 293.04042  | 7    | 70.18         | 2              | 2             | 72.65       | 96.29           | (Collection) |
| 293.0410  | C <sub>12</sub> H <sub>9</sub> O <sub>7</sub> N <sub>2</sub>                                       | 23.30197011<br>13375 | 9.50  | 1.89        | 293.04043  | 8    | 70.05         | 2              | 2             | 72.65       | 98.18           | (Collection) |
| 293.0410  | C <sub>13</sub> H <sub>6</sub> O <sub>4</sub> N <sub>3</sub> <sup>23</sup><br>Na                   | 22.33205793<br>14074 | 11.00 | 0.96        | 293.04070  | 9    | 70            | 2              | 2             | 72.65       | 98.62           | (Collection) |
| 293.0410  | C <sub>10</sub> H <sub>6</sub> O <sub>2</sub> N <sub>7</sub> <sup>35</sup><br>Cl                   | 7.402430680<br>81283 | 10.00 | -4.33       | 293.04225  | 10   | 69.21         | 5              | 3             | 72.65       | 73.44           | (Collection) |

Figure S166 - HRMS spectrum of Nucleoside 50

## 2'-Deoxy-deaza-6-bromopurine (51)

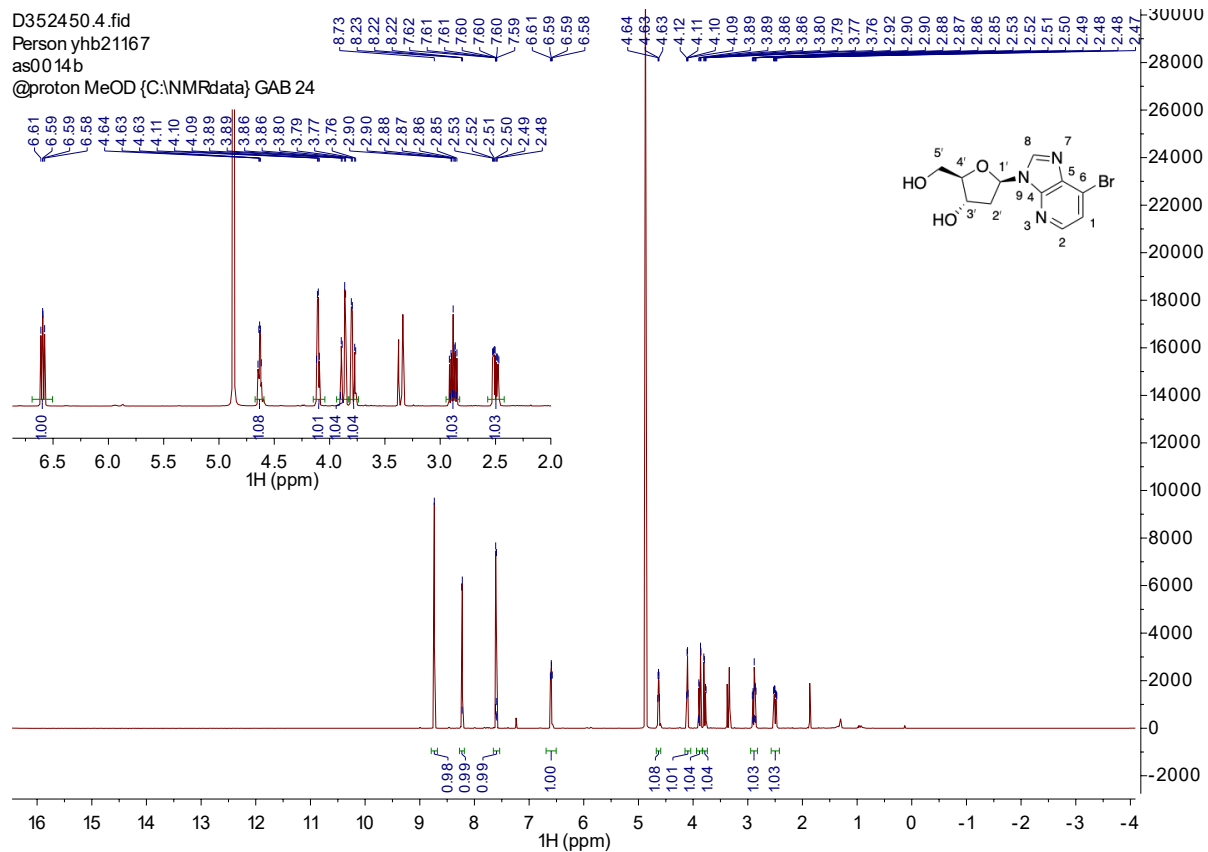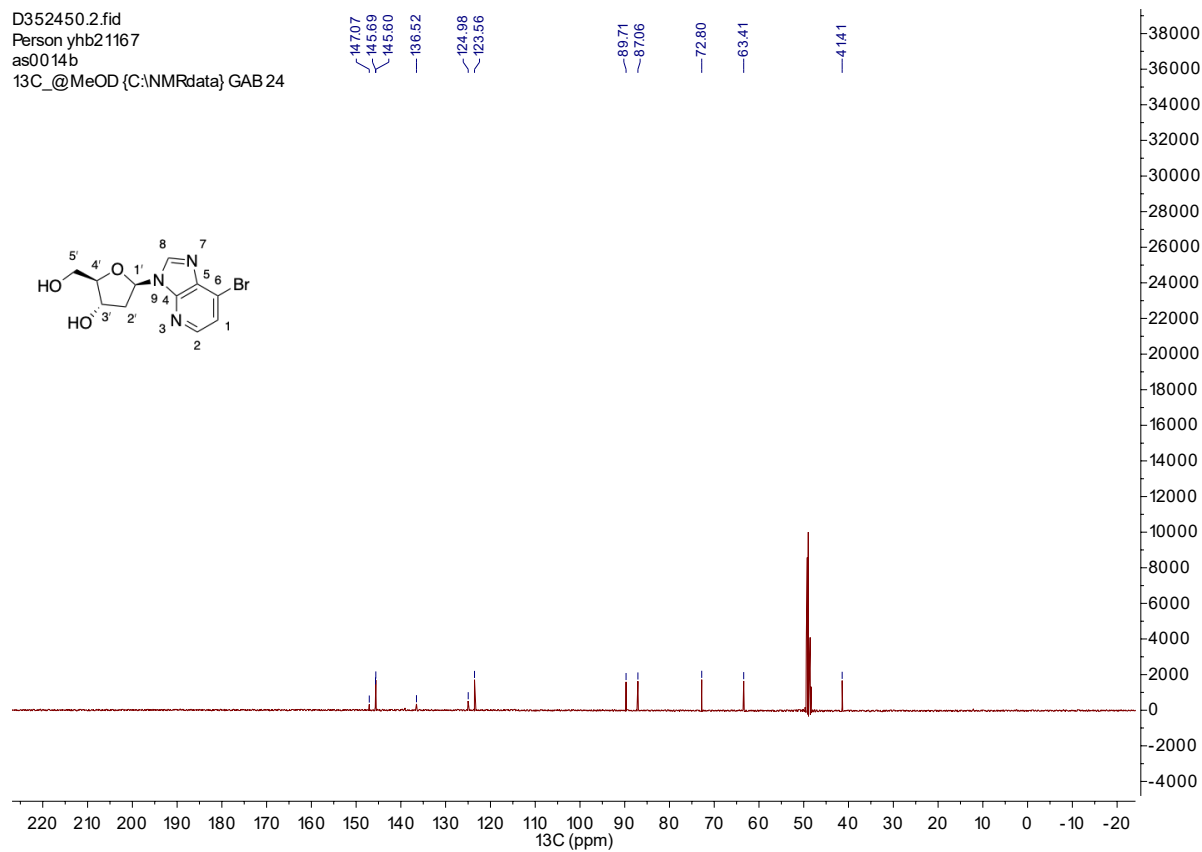

Sample Name : AS014 24HOURS  
 Sample ID :  
 Data Filename : AS014 FINAL RUN\_17112021\_002.lcd  
 Method Filename : JMW NDT method with Thymine calibration.lcm  
 Batch Filename : AS014 FINAL RUN.lcb  
 Vial # : 1-99  
 Injection Volume : 10 uL  
 Date Acquired : 17/11/2021 10:47:39  
 Date Processed : 17/11/2021 11:01:41

Sample Type : Unknown  
 Acquired by : Shimadzu  
 Processed by : Shimadzu

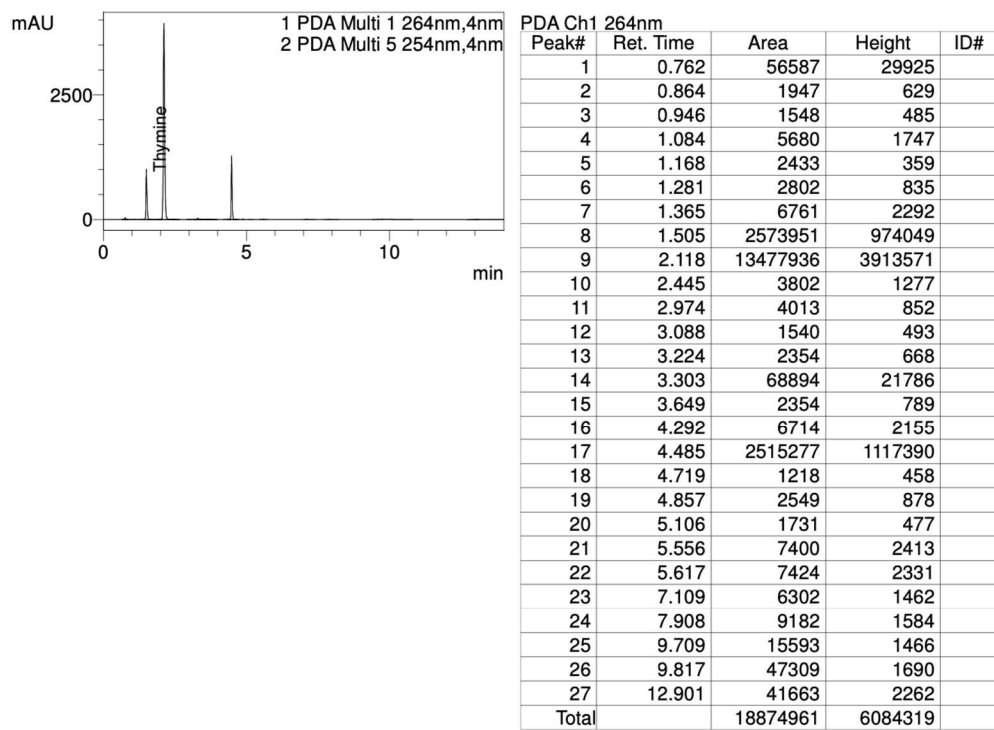

Figure S169 - HPLC trace used to obtain nucleoside 51. *R.T* = 1.5 = nucleobase thymine, 2.12 = nucleoside dT, 4.49 = nucleoside 51 formed.

JRB\_AS014 #40-78 RT: 0.39-0.74 AV: 19 NL: 6.11E7  
T: FTMS + p ESI Full ms [150.0000-2000.0000]

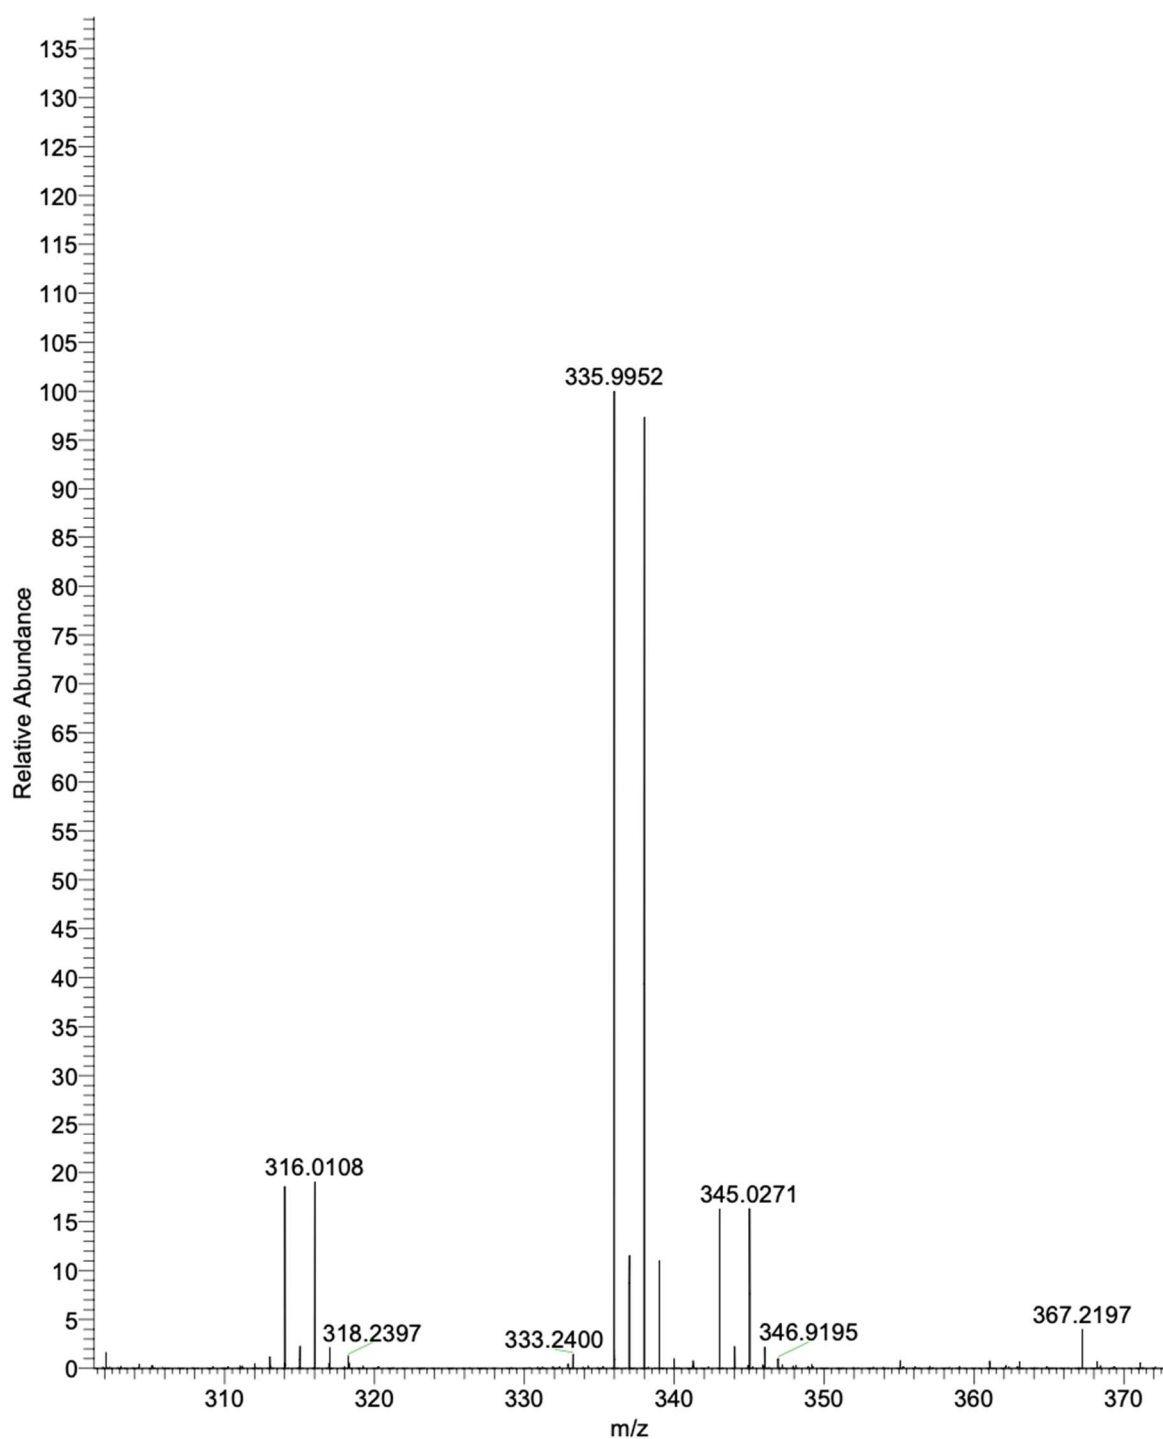

Figure S170 - HRMS spectra of nucleoside 51

**3',5'-tri-O-acetyl-deaza-6-bromopurine (57)**

EB6074.1.fid  
 Person yhb21167  
 AS089.M.OAc

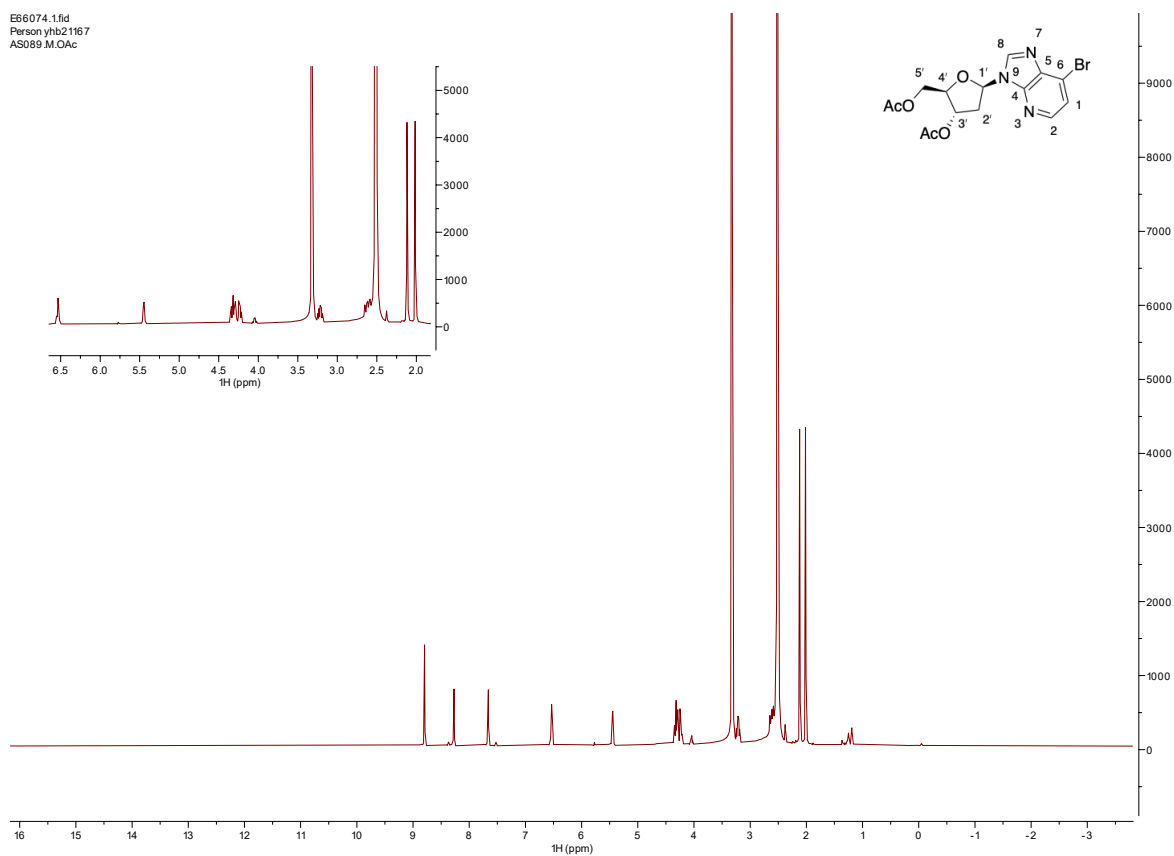

EB6074.2.fid  
 Person yhb21167  
 AS089.M.OAc

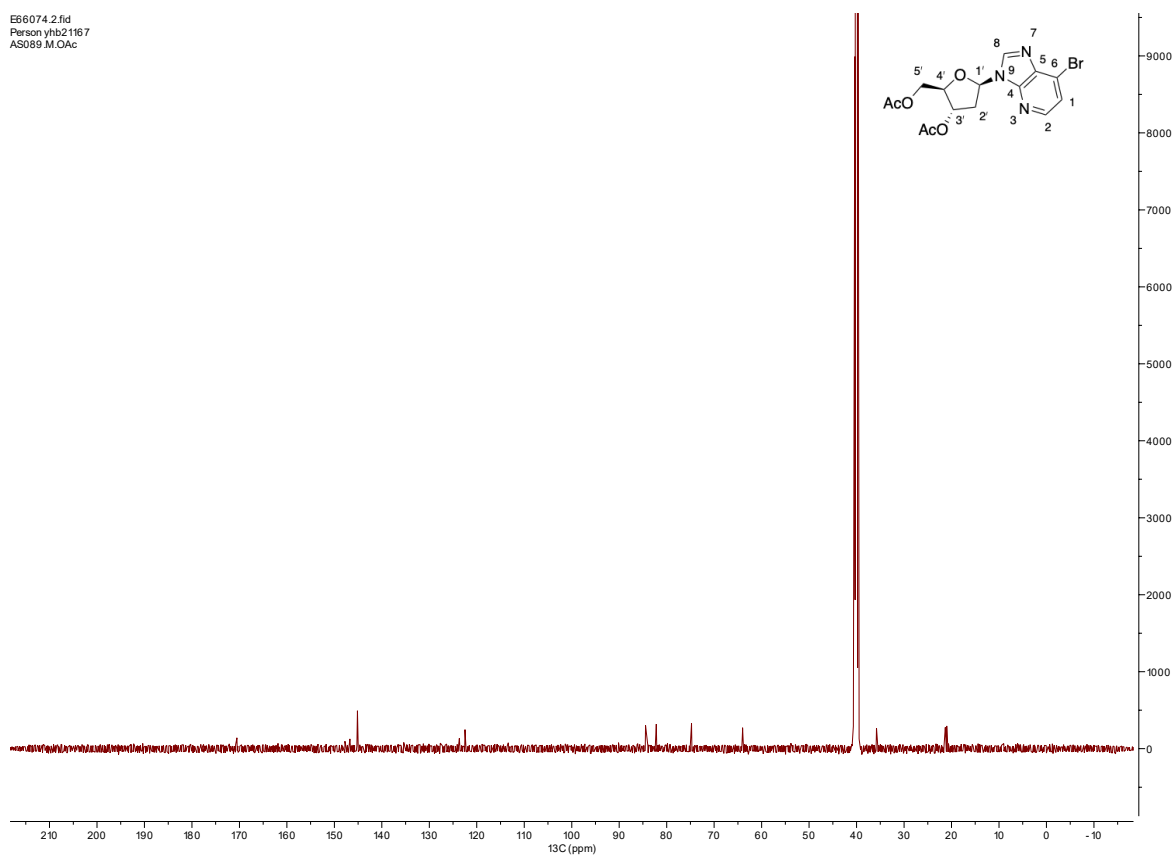

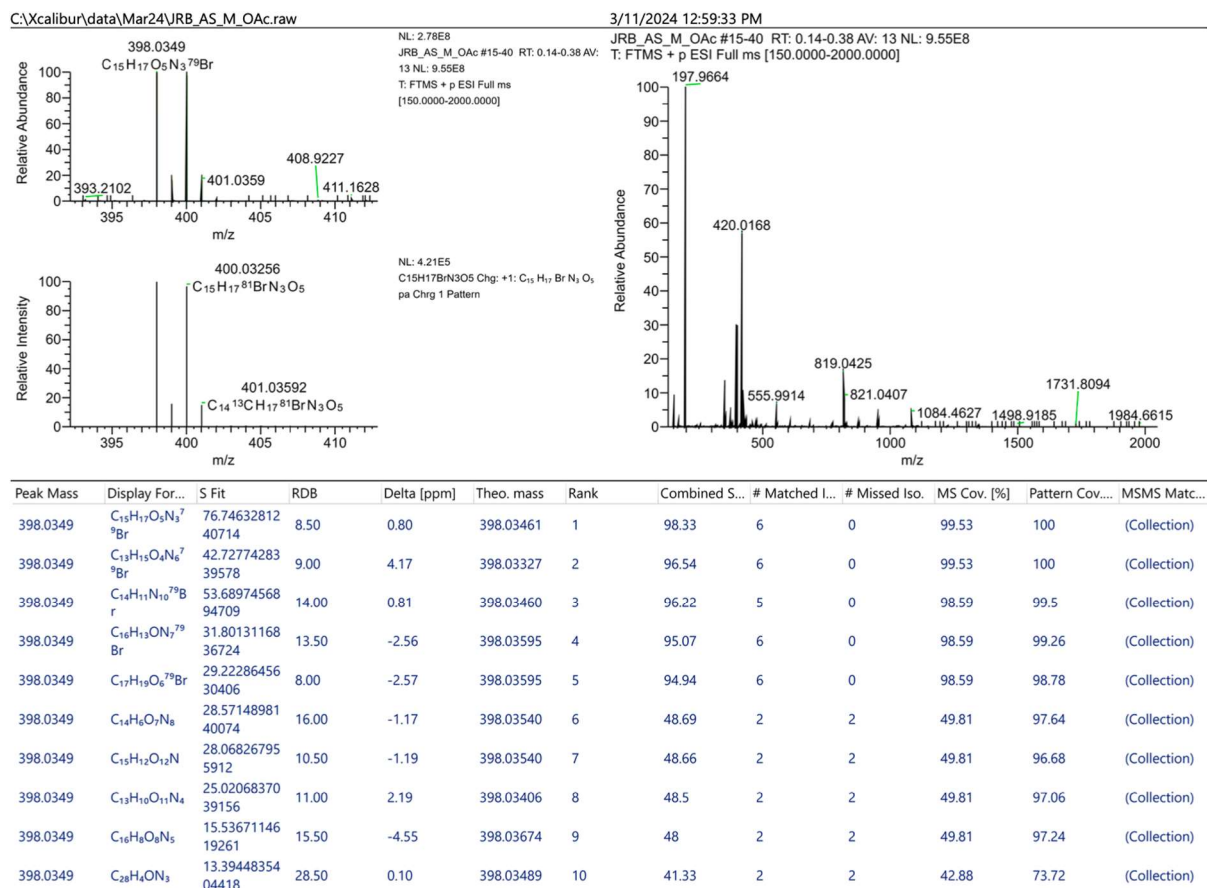

Figure S173 - HRMS spectra of nucleoside 57

## 2'-Deoxy-deaza-6-<sup>15</sup>N-benzamidepurine (58)

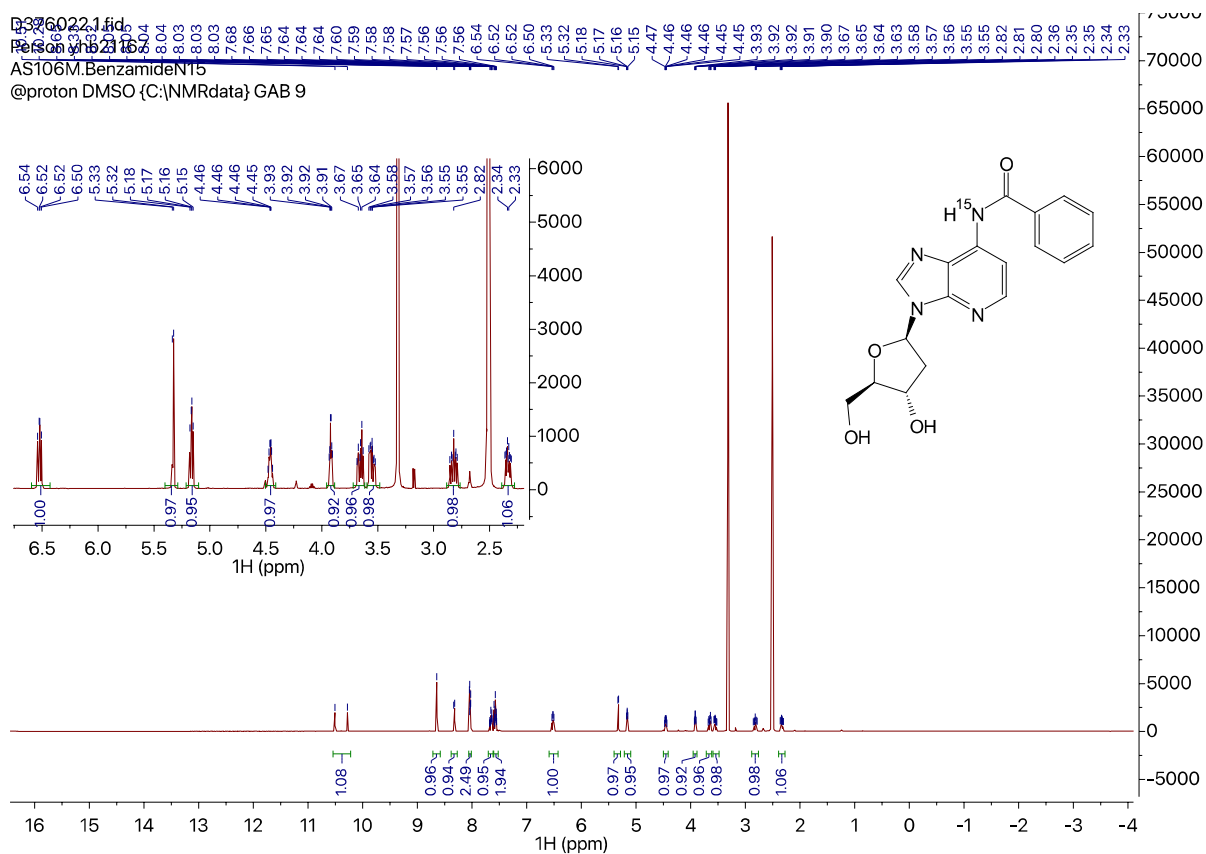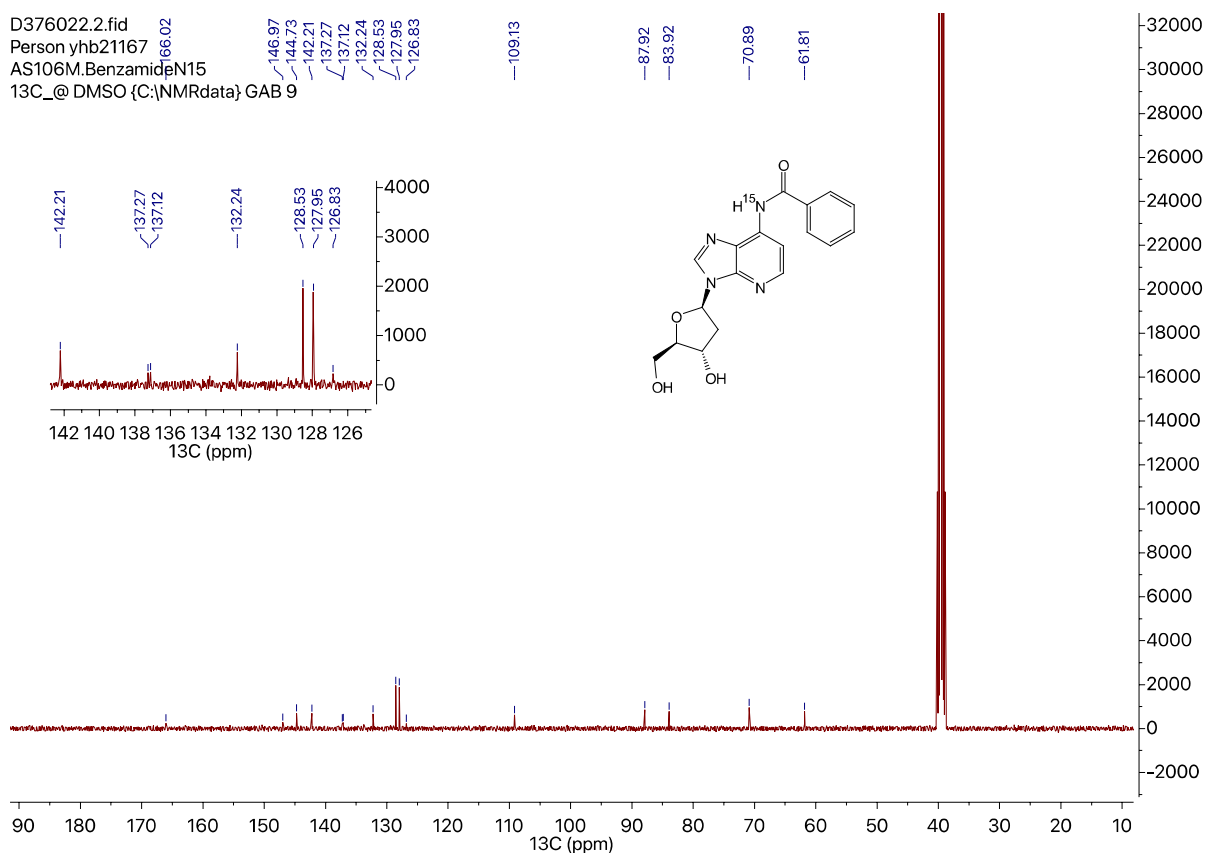



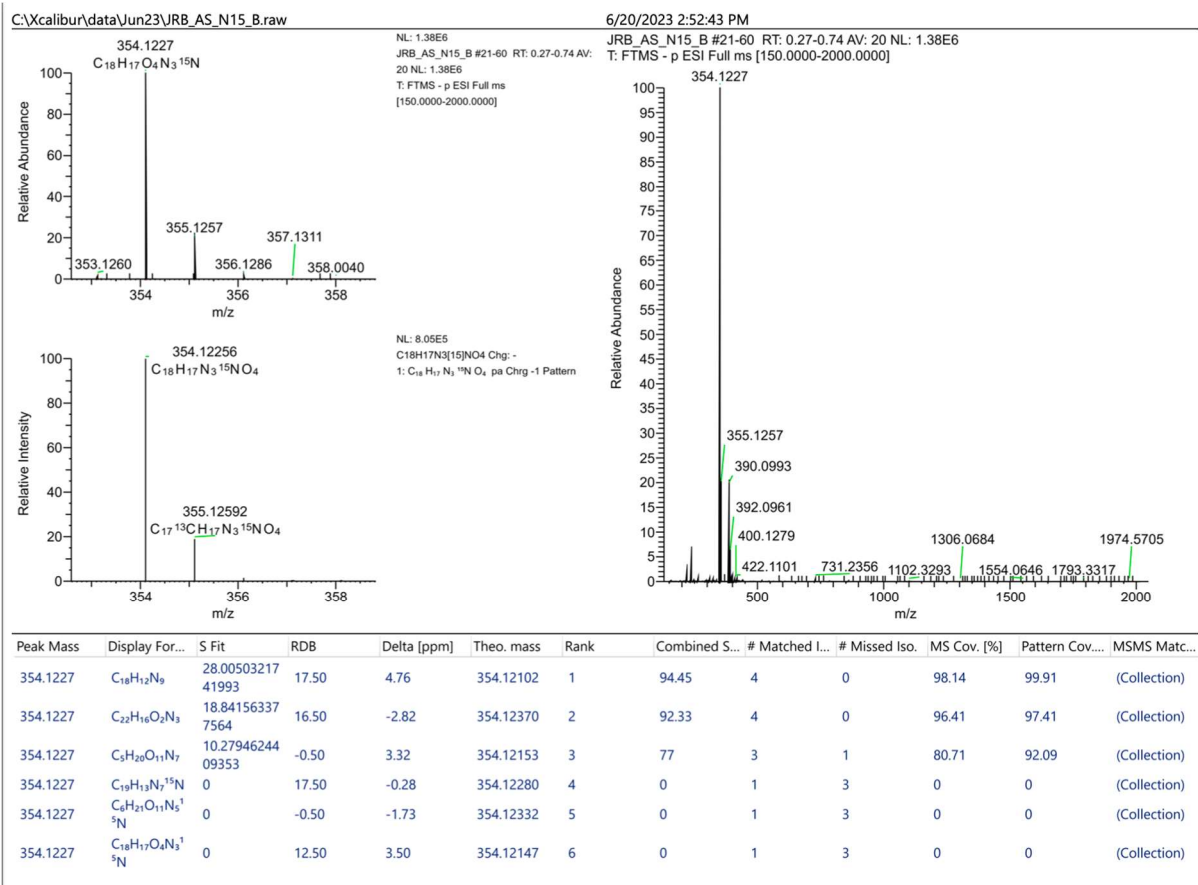

Figure S176 - HRMS of nucleoside 58.
